# Supplementary material for: Distalp-benzylic deuterationviaN-heterocyclic carbene catalyzed ring opening ofp-cyclopropylbenzaldehydes
Source: Royal Society of Chemistry journal article supplement (doi:10.1039/d3ob00394a), 2023-01-01
Supplement: d3ob00394a1.pdf [file d3ob00394a1.pdf]

## Contents

|                                                                                     |     |
|-------------------------------------------------------------------------------------|-----|
| Part I Experimental Part.....                                                       | S1  |
| 1. General information .....                                                        | S1  |
| 2. Substrate Preparation. ....                                                      | S2  |
| 3. Preliminary reaction optimization using MeOH. ....                               | S12 |
| 4. General procedure for 1,3-deuteration via ring opening of DA cyclopropanes. .... | S13 |
| 5. Gram-scale synthesis.....                                                        | S22 |
| 6. Chemical transformations of 2a. ....                                             | S22 |
| 7. References.....                                                                  | S26 |
| Part II NRM spectra.....                                                            | S27 |

## Part I Experimental Part

### 1. General information

Unless otherwise indicated, all reactions were carried out under N<sub>2</sub> protection with magnetic stirring. Anhydrous THF, toluene and 1,4-dioxane were distilled from sodium and benzophenone. Anhydrous CH<sub>3</sub>CN and CH<sub>2</sub>Cl<sub>2</sub> were distilled from CaH<sub>2</sub>. Analytical thin layer chromatography was carried out with silica gel pre-coated glass plates (TLC-Silica gel GF254, coating thickness: 0.25 mm) purchased from Xinnuo Chemical (Yantai, China). Visualization was accomplished with short wave UV light (254 nm, 365 nm) and/or 10% phosphomolybdic acid in ethanol or KMnO<sub>4</sub> staining solutions followed by heating. Column chromatograph was performed on silica gel (200~300 mesh). All <sup>1</sup>H NMR (400 MHz), <sup>13</sup>C NMR (101 MHz); <sup>1</sup>H NMR (500 MHz), <sup>13</sup>C NMR (126 MHz) spectra were recorded on a Bruker-DMX 400 and 500 spectrometers in CDCl<sub>3</sub>, with tetramethylsilane as an internal standard and reported in parts per million (ppm, δ). <sup>1</sup>H NMR

spectroscopy splitting patterns were designated as singlet (s), doublet (d), triplet (t), quartet (q). Splitting patterns that could not be interpreted or easily visualized were designated as multiplet (m) or broad (br). High-resolution mass spectra (HRMS) were obtained with the mass analyzer of an orbitrap. Infrared spectra were recorded on a JASCO FT/IR-480 spectrophotometer and reported as wave number (cm<sup>-1</sup>).

The amount of incorporated deuterium in a sample was quantified by the decrease of <sup>1</sup>H NMR integral intensities at the specified positions compared to the non-deuterated samples. Integral intensities were calibrated against hydrogen signals that do not undergo H/D-exchange.

## 2. Substrate Preparation.

### General procedure A for synthesis of 1a-1i

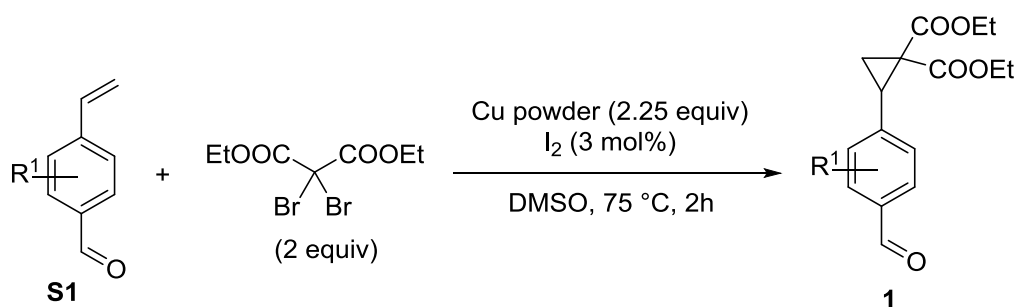

This procedure was performed according to known literature<sup>1</sup>. To a 50 mL Schlenk tube were added Cu powder (2.25 equiv) and I<sub>2</sub> (3 mol%), the reaction tube was sealed with septum, and was evacuated and backfilled with nitrogen three times, vinyl substituted aryl aldehyde **S1** (1 equiv) and diethyl dibromomalonate (2 equiv) and DMSO (1 mL/mmol) were added with syringe. The reaction mixture was stirred at 75 °C under nitrogen atmosphere for 2h. After the reaction was complete, the reaction solution was then diluted with water, and extracted with EtOAc for three times. The combined organic extracts were washed with water, then with brine, dried over anhydrous MgSO<sub>4</sub> and concentrated under reduced pressure. The residual was purified by flash column chromatography and then recrystallization from petroleum ether/Et<sub>2</sub>O afforded the desired product **1**.

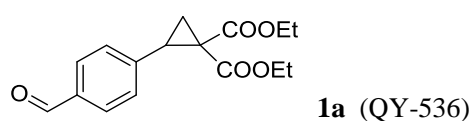

### Diethyl 2-(4-formylphenyl)cyclopropane-1,1-dicarboxylate

2.05 g, 42% yield. White solid, m.p. 62-63 °C.  $R_f = 0.21$  (petroleum ether/ethyl acetate, 7:1).  
 $^1\text{H NMR}$  (500 MHz,  $\text{CDCl}_3$ )  $\delta$  9.98 (s, 1H), 7.80 (d,  $J = 8.1$  Hz, 2H), 7.38 (d,  $J = 8.1$  Hz, 2H), 4.32 – 4.20 (m, 2H), 3.92 – 3.80 (m, 2H), 3.26 (t,  $J = 8.5$  Hz, 1H), 2.21 (dd,  $J = 7.9, 5.4$  Hz, 1H), 1.77 (dd,  $J = 9.1, 5.3$  Hz, 1H), 1.31 (t,  $J = 7.1$  Hz, 3H), 0.89 (t,  $J = 7.1$  Hz, 3H).  
 $^{13}\text{C NMR}$  (126 MHz,  $\text{CDCl}_3$ )  $\delta$  191.8, 169.4, 166.3, 142.0, 135.5, 129.5, 129.2, 62.0, 61.4, 37.9, 31.8, 18.9, 14.1, 13.7.  
**IR** (KBr)  $\nu$  2983, 1725, 1608, 1372, 1277, 1212, 1133, 1026, 836.  
**HRMS** (APCI)  $m/z$ : Calcd for  $\text{C}_{16}\text{H}_{17}\text{O}_5$  ( $[\text{M}-\text{H}]^-$ ) 289.1082, found 289.1076.

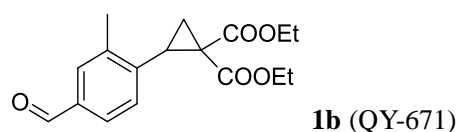

**Diethyl 2-(4-formyl-2-methylphenyl)cyclopropane-1,1-dicarboxylate**

1.09 g, 89% yield. Colorless oil.  $R_f = 0.29$  (petroleum ether/ethyl acetate, 5:1).  
 $^1\text{H NMR}$  (500 MHz,  $\text{CDCl}_3$ )  $\delta$  9.95 (s, 1H), 7.67 (s, 1H), 7.63 (d,  $J = 7.8$  Hz, 1H), 7.22 (d,  $J = 7.8$  Hz, 1H), 4.34 – 4.23 (m, 2H), 3.80 (q,  $J = 7.1$  Hz, 2H), 3.18 (t,  $J = 8.6$  Hz, 1H), 2.46 (s, 3H), 2.31 (dd,  $J = 8.1, 5.2$  Hz, 1H), 1.75 (dd,  $J = 9.0, 5.2$  Hz, 1H), 1.31 (t,  $J = 7.1$  Hz, 3H), 0.83 (t,  $J = 7.1$  Hz, 3H).  
 $^{13}\text{C NMR}$  (126 MHz,  $\text{CDCl}_3$ )  $\delta$  192.1, 169.5, 166.3, 140.30, 140.26, 135.5, 130.3, 128.1, 127.5, 61.9, 61.3, 36.7, 30.8, 19.5, 18.3, 14.1, 13.6.  
**IR** (KBr)  $\nu$  2983, 1725, 1696, 1374, 1321, 1281, 1210, 1132, 1027.  
**HRMS** (APCI)  $m/z$ : Calcd for  $\text{C}_{17}\text{H}_{19}\text{O}_5$  ( $[\text{M}-\text{H}]^-$ ) 303.1238, found 303.1233.

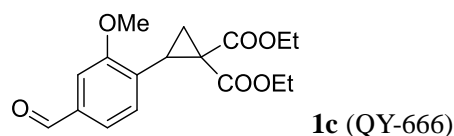

**Diethyl 2-(4-formyl-2-methoxyphenyl)cyclopropane-1,1-dicarboxylate**

0.98 g, 78% yield. White solid, m.p. 52-54 °C.  $R_f = 0.17$  (petroleum ether/ethyl acetate, 5:1).  
 $^1\text{H NMR}$  (500 MHz,  $\text{CDCl}_3$ )  $\delta$  9.94 (s, 1H), 7.37 – 7.34 (m, 2H), 7.17 (d,  $J = 7.6$  Hz, 1H), 4.30 – 4.23 (m, 2H), 3.91 (s, 3H), 3.83 (q,  $J = 7.1$  Hz, 2H), 3.33 (t,  $J = 8.7$  Hz, 1H), 2.19 (dd,  $J = 8.2, 5.2$  Hz, 1H), 1.75 (dd,  $J = 9.0, 5.2$  Hz, 1H), 1.31 (t,  $J = 7.0$  Hz, 3H), 0.85 (t,  $J = 7.1$  Hz, 3H).  
 $^{13}\text{C NMR}$  (126 MHz,  $\text{CDCl}_3$ )  $\delta$  191.8, 169.6, 166.6, 159.8, 136.8, 131.2, 128.4, 123.9, 108.0, 61.7, 61.1, 55.8, 36.8, 27.8, 18.4, 14.1, 13.7.  
**IR** (KBr)  $\nu$  2982, 1722, 1692, 1388, 1267, 1207, 1128, 1032.  
**HRMS** (APCI)  $m/z$ : Calcd for  $\text{C}_{17}\text{H}_{19}\text{O}_6$  ( $[\text{M}-\text{H}]^-$ ) 319.1187, found 319.1181.

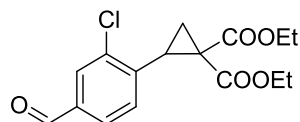

**1d** (QY-670)

**Diethyl 2-(2-chloro-4-formylphenyl)cyclopropane-1,1-dicarboxylate**

1.04 g, 76% yield. Yellow oil.  $R_f = 0.26$  (petroleum ether/ethyl acetate, 5:1).

$^1\text{H NMR}$  (500 MHz,  $\text{CDCl}_3$ )  $\delta$  9.95 (s, 1H), 7.88 (s, 1H), 7.70 (d,  $J = 7.9$ , 1H), 7.29 (d,  $J = 7.9$  Hz, 1H), 4.33 – 4.25 (m, 2H), 3.86 (q,  $J = 7.1$  Hz, 2H), 3.37 (t,  $J = 8.6$  Hz, 1H), 2.25 (dd,  $J = 8.1$ , 5.5 Hz, 1H), 1.83 (dd,  $J = 8.9$ , 5.3 Hz, 1H), 1.32 (t,  $J = 7.1$  Hz, 3H), 0.89 (t,  $J = 7.1$  Hz, 3H).

$^{13}\text{C NMR}$  (126 MHz,  $\text{CDCl}_3$ )  $\delta$  190.4, 169.0, 166.3, 139.8, 137.8, 136.6, 129.6, 127.7, 61.9, 61.4, 36.9, 30.7, 18.6, 14.1, 13.7.

**IR** (KBr)  $\nu$  2982, 1702, 1600, 1373, 1278, 1218, 1132, 835.

**HRMS** (APCI)  $m/z$ : Calcd for  $\text{C}_{16}\text{H}_{16}\text{ClO}_5$  ( $[\text{M}-\text{H}]^-$ ) 323.0692, found 323.0685.

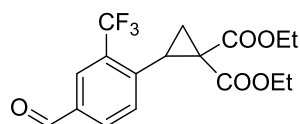

**1e** (QY-713)

**Diethyl 2-(4-formyl-2-(trifluoromethyl)phenyl)cyclopropane-1,1-dicarboxylate**

1.93 g, 87% yield. Yellow oil.  $R_f = 0.26$  (petroleum ether/ethyl acetate, 5:1).

$^1\text{H NMR}$  (500 MHz,  $\text{CDCl}_3$ )  $\delta$  10.03 (s, 1H), 8.16 (s, 1H), 7.97 (d,  $J = 7.9$ , 1H), 7.38 (d,  $J = 8.0$  Hz, 1H), 4.32 – 4.23 (m, 2H), 3.88 – 3.81 (m, 2H), 3.48 (t,  $J = 8.5$  Hz, 1H), 2.33 (dd,  $J = 7.6$ , 5.9 Hz, 1H), 1.87 (dd,  $J = 8.9$ , 5.5 Hz, 1H), 1.31 (t,  $J = 7.1$  Hz, 3H), 0.86 (t,  $J = 7.1$  Hz, 3H).

$^{13}\text{C NMR}$  (126 MHz,  $\text{CDCl}_3$ )  $\delta$  190.3, 168.6, 166.2, 139.9, 135.2, 132.3, 131.9 (q,  $^2J_{\text{CF}} = 30.9$  Hz), 129.5, 127.1 (q,  $^3J_{\text{CF}} = 5.4$  Hz), 123.6 (q,  $^1J_{\text{CF}} = 274.4$  Hz), 62.0, 61.4, 38.3, 29.3, 18.5, 14.1, 13.7.

$^{19}\text{F NMR}$  (376 MHz,  $\text{CDCl}_3$ )  $\delta$  -61.0 (s).

**IR** (KBr)  $\nu$  2921, 1708, 1319, 1289, 1222, 1191, 1167, 1132.

**HRMS** (APCI)  $m/z$ : Calcd for  $\text{C}_{17}\text{H}_{16}\text{O}_5\text{F}_3$  ( $[\text{M}-\text{H}]^-$ ) 357.0955, found 357.0947.

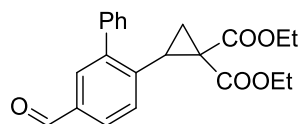

**1f** (QY-701)

**Diethyl 2-(5-formyl-[1,1'-biphenyl]-2-yl)cyclopropane-1,1-dicarboxylate**

1.74 g, 90% yield. Yellow oil.  $R_f = 0.31$  (petroleum ether/ethyl acetate, 5:1).

$^1\text{H NMR}$  (500 MHz,  $\text{CDCl}_3$ )  $\delta$  10.02 (s, 1H), 7.77 – 7.79 (m, 2H), 7.47 – 7.38 (m, 5H), 7.22 (d,  $J = 8.3$  Hz, 1H), 4.21 – 4.10 (m, 2H), 3.92 (q,  $J = 7.1$  Hz, 2H), 3.03 (t,  $J = 8.7$  Hz, 1H), 2.22 (dd,  $J = 8.2$ , 5.6 Hz, 1H), 1.72 (dd,  $J = 9.1$ , 5.5 Hz, 1H), 1.22 (t,  $J = 7.1$  Hz, 3H), 0.90 (t,  $J = 7.1$  Hz, 3H).

$^{13}\text{C NMR}$  (126 MHz,  $\text{CDCl}_3$ )  $\delta$  191.8, 168.7, 166.3, 144.9, 139.6, 139.3, 135.3, 131.1, 129.3, 128.3, 128.0, 127.8, 126.9, 61.7, 61.4, 39.1, 31.7, 19.2, 14.1, 13.8.

IR (KBr)  $\nu$  2980, 1727, 1701, 1373, 1324, 1274, 1211, 1132, 1025, 703.

HRMS (APCI)  $m/z$ : Calcd for  $C_{22}H_{21}O_6$  ( $[M-H]^-$ ) 365.1395, found 365.1386.

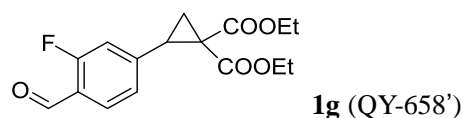

**Diethyl 2-(3-fluoro-4-formylphenyl)cyclopropane-1,1-dicarboxylate**

2.34 g, 48% yield. White solid, m.p. 76-77 °C.  $R_f$  = 0.17 (petroleum ether/ethyl acetate, 10:1).

$^1H$  NMR (500 MHz,  $CDCl_3$ )  $\delta$  10.30 (s, 1H), 7.78 (t,  $J$  = 7.6 Hz, 1H), 7.13 (d,  $J$  = 8.0 Hz, 1H), 7.03 (d,  $J$  = 11.2 Hz, 1H), 4.32 – 4.20 (m, 2H), 3.98 – 3.87 (m, 2H), 3.21 (t,  $J$  = 8.5 Hz, 1H), 2.16 (dd,  $J$  = 7.6, 5.6 Hz, 1H), 1.78 (dd,  $J$  = 9.0, 5.5 Hz, 1H), 1.31 (t,  $J$  = 7.1 Hz, 3H), 0.96 (t,  $J$  = 7.1 Hz, 3H).

$^{13}C$  NMR (126 MHz,  $CDCl_3$ )  $\delta$  186.7 (d,  $^3J_{CF}$  = 6.1 Hz), 169.1, 166.0, 164.3 (d,  $^1J_{CF}$  = 258.9 Hz), 144.9 (d,  $^3J_{CF}$  = 8.9 Hz), 128.4 (d,  $^3J_{CF}$  = 2.0 Hz), 125.0 (d,  $^4J_{CF}$  = 2.9 Hz), 123.1 (d,  $^2J_{CF}$  = 8.2 Hz), 116.5 (d,  $^2J_{CF}$  = 21.3 Hz), 62.1, 61.5, 38.0, 31.3, 19.0, 14.1, 13.8.

$^{19}F$  NMR (376 MHz,  $CDCl_3$ )  $\delta$  -122.1 (s)

IR (KBr)  $\nu$  2985, 1726, 1696, 1621, 1323, 1280, 1207, 1133.

HRMS (APCI)  $m/z$ : Calcd for  $C_{16}H_{16}FO_5$  ( $[M-H]^-$ ) 307.0987, found 307.0984.

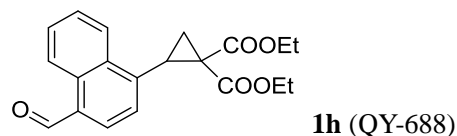

**Diethyl 2-(4-formylnaphthalen-1-yl)cyclopropane-1,1-dicarboxylate**

0.36 g, 26% yield. White solid, m.p. 82-84 °C.  $R_f$  = 0.19 (petroleum ether/ethyl acetate, 10:1).

$^1H$  NMR (500 MHz,  $CDCl_3$ )  $\delta$  10.35 (s, 1H), 9.27 (d,  $J$  = 8.2, 1H), 8.31 (dd,  $J$  = 8.4, 1H), 7.91 (d,  $J$  = 7.3 Hz, 1H), 7.71 – 7.64 (m, 2H), 7.48 (d,  $J$  = 7.3 Hz, 1H), 4.42 – 4.30 (m, 2H), 3.70 (t,  $J$  = 8.6 Hz, 1H), 3.62 – 3.51 (m, 2H), 2.44 (dd,  $J$  = 8.0, 5.2 Hz, 1H), 1.86 (dd,  $J$  = 8.9, 5.2 Hz, 1H), 1.36 (t,  $J$  = 7.1 Hz, 3H), 0.41 (t,  $J$  = 7.1 Hz, 3H).

$^{13}C$  NMR (126 MHz,  $CDCl_3$ )  $\delta$  193.3, 169.5, 166.4, 139.0, 136.0, 133.4, 131.1, 130.4, 128.9, 127.2, 125.2, 125.00, 124.96, 62.1, 61.1, 37.3, 30.0, 18.4, 14.1, 13.2.

IR (KBr)  $\nu$  2985, 1723, 1690, 1316, 1288, 1202, 1132, 760.

HRMS (APCI)  $m/z$ : Calcd for  $C_{20}H_{19}O_5$  ( $[M-H]^-$ ) 339.1238, found 339.1231.

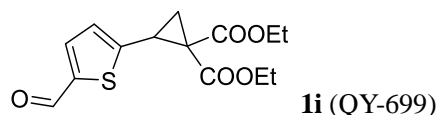

**Diethyl 2-(5-formylthiophen-2-yl)cyclopropane-1,1-dicarboxylate**

0.74 g, 50% yield. Yellow oil.  $R_f = 0.27$  (petroleum ether/ethyl acetate, 4:1).

$^1\text{H NMR}$  (500 MHz,  $\text{CDCl}_3$ )  $\delta$  9.81 (s, 1H), 7.59 (d,  $J = 3.8$  Hz, 1H), 6.94 (d,  $J = 3.8$  Hz, 1H), 4.32 – 4.19 (m, 2H), 4.04 – 3.93 (m, 2H), 3.29 (t,  $J = 8.3$  Hz, 1H), 2.13 (dd,  $J = 7.6, 5.4$  Hz, 1H), 1.86 (dd,  $J = 9.1, 5.4$  Hz, 1H), 1.30 (t,  $J = 7.1$  Hz, 3H), 1.02 (t,  $J = 7.1$  Hz, 3H).

$^{13}\text{C NMR}$  (126 MHz,  $\text{CDCl}_3$ )  $\delta$  182.5, 168.8, 165.9, 149.5, 142.9, 136.1, 127.3, 62.2, 61.7, 38.6, 26.9, 20.8, 14.1, 13.8.

**IR** (KBr)  $\nu$  2980, 2912, 1720, 1665, 1319, 1272, 1200, 1132, 670.

**HRMS** (APCI)  $m/z$ : Calcd for  $\text{C}_{14}\text{H}_{15}\text{O}_5$  ( $[\text{M}-\text{H}]^-$ ) 295.0646, found 295.0640.

**Synthesis of 1j.**

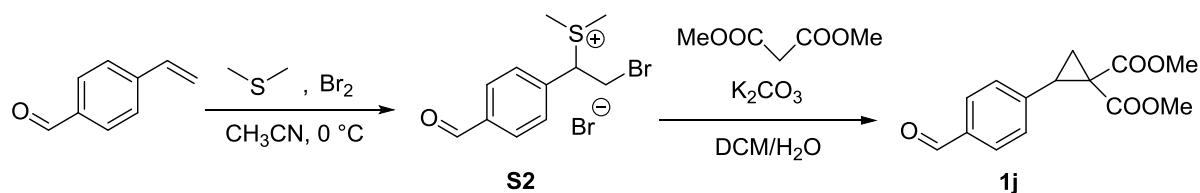

To a solution of dimethyl sulfide (3.4 mL, 46 mmol) in  $\text{CH}_3\text{CN}$  (20 mL) kept at 0 °C was added bromine (0.67 mL, 13 mmol) to give a yellow precipitate. 4-vinylbenzaldehyde (2.60 g, 19.7 mmol) was then added and stirring was continued for 30 min at the same temperature. The solution was then brought to room temperature and stirred further for 1 h, and diethyl ether (30 mL) was added to it to give a white precipitate that was then filtered and washed with diethyl ether to give the corresponding bromosulfonium bromide **S2** as a white solid (2.30 g, 50% yield), which was directly used in the next step.

Potassium carbonate (2.07 g, 15 mmol) was added to a solution containing **S2** (1.77 g, 5 mmol) in  $\text{CH}_2\text{Cl}_2:\text{H}_2\text{O}$  (1:1) mixture (50 mL). Dimethyl malonate (0.63 mL, 5.5 mmol) was added to it and the reaction mixture was stirred for 48 h at room temperature. The  $\text{CH}_2\text{Cl}_2$  layer was then separated and the aqueous layer was washed three times with dichloromethane (20 mL) and added to the organic layer. The combined organic layers were dried over anhydrous  $\text{Na}_2\text{SO}_4$  and then evaporated. The residue was then purified by column chromatography on silica gel (petroleum ether/ethyl acetate, 5:1 - 3:1) to give product **1j**.

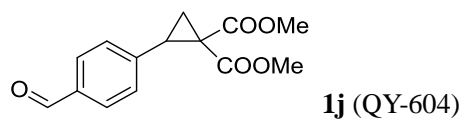

**Dimethyl 2-(4-formylphenyl)cyclopropane-1,1-dicarboxylate**

0.39 g, 30% yield. Colorless crystalline solid (0.39g, 30%), m.p. 44-46 °C.  $R_f = 0.21$  (petroleum ether/ethyl acetate, 5:1).

$^1\text{H NMR}$  (500 MHz,  $\text{CDCl}_3$ )  $\delta$  9.98 (s, 1H), 7.80 (d,  $J = 8.2$  Hz, 2H), 7.36 (d,  $J = 8.1$  Hz, 2H), 3.81 (s, 3H), 3.39 (s, 3H), 3.27 (t,  $J = 8.6$  Hz, 1H), 2.24 (dd,  $J = 8.0, 5.4$  Hz, 1H), 1.81 (dd,  $J = 9.1, 5.4$  Hz, 1H).

$^{13}\text{C NMR}$  (126 MHz,  $\text{CDCl}_3$ )  $\delta$  191.8, 169.8, 166.7, 141.9, 135.5, 129.6, 129.1, 53.1, 52.50, 37.7, 32.2, 19.3.

**IR** (KBr)  $\nu$  2955, 1730, 1702, 1608, 1439, 1334, 1280, 1175, 1132, 839.

**HRMS** (APCI)  $m/z$ : Calcd for  $\text{C}_{14}\text{H}_{13}\text{O}_5$  ( $[\text{M}-\text{H}]^-$ ) 261.0768, found 261.0763.

### General procedure B for synthesis of 1k-1o

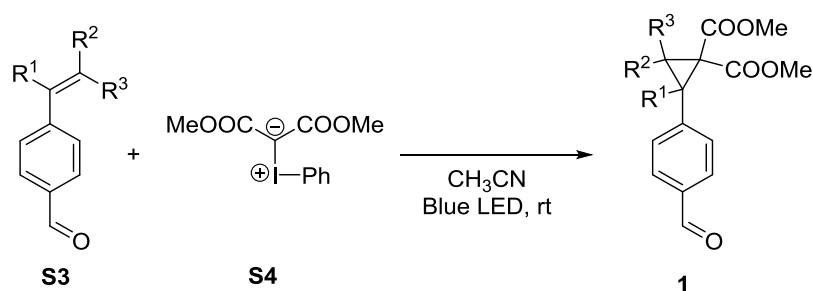

This procedure was performed according to the known literature<sup>2</sup>. Into a suspension of iodonium ylide (1 equiv) in  $\text{CH}_3\text{CN}$  (10 mL/mmol) was added **S4** (2 equiv) in one portion under nitrogen atmosphere. The reaction mixture was irradiated with blue LED and stirred at room temperature for 24h. The mixture was then evaporated to dryness and diluted with EtOAc and washed with saturated aq.  $\text{Na}_2\text{S}_2\text{O}_3$ . The aqueous layer was washed with EtOAc once, and the combined organic layers were dried over anhydrous  $\text{MgSO}_4$  and then evaporated. The residue was then purified by column chromatography on silica gel to afford the desired product **1**.

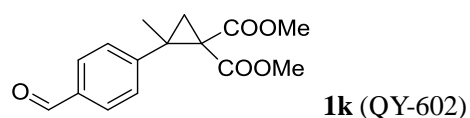

#### Dimethyl 2-(4-formylphenyl)-2-methylcyclopropane-1,1-dicarboxylate

0.59 g, 27% yield. Yellow oil.  $R_f = 0.19$  (petroleum ether/ethyl acetate, 5:1).

$^1\text{H NMR}$  (500 MHz,  $\text{CDCl}_3$ )  $\delta$  9.98 (s, 1H), 7.83 (d,  $J = 7.6$  Hz, 2H), 7.47 (d,  $J = 7.6$  Hz, 2H), 3.86 (s, 3H), 3.39 (s, 3H), 2.21 (d,  $J = 5.0$  Hz, 1H), 1.77 (d,  $J = 4.9$  Hz, 1H), 1.51 (s, 3H).

$^{13}\text{C NMR}$  (126 MHz,  $\text{CDCl}_3$ )  $\delta$  191.9, 168.3, 167.9, 148.2, 135.2, 129.8, 129.0, 52.9, 52.46, 40.4, 37.6, 25.0, 24.2.

**IR** (KBr)  $\nu$  2952, 1732, 1702, 1608, 1436, 1307, 1269, 1128, 1103, 835.

**HRMS** (APCI)  $m/z$ : Calcd for  $\text{C}_{15}\text{H}_{15}\text{O}_5$  ( $[\text{M}-\text{H}]^-$ ) 275.0925, found 275.0921.

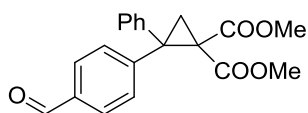

**1l** (QY-633)

**Dimethyl 2-(4-formylphenyl)-2-phenylcyclopropane-1,1-dicarboxylate**

0.43 g, 18% yield. Yellow oil.  $R_f = 0.16$  (petroleum ether/ethyl acetate, 5:1).

$^1\text{H NMR}$  (500 MHz,  $\text{CDCl}_3$ )  $\delta$  9.94 (s, 1H), 7.78 (d,  $J = 8.2$  Hz, 2H), 7.60 (d,  $J = 8.1$  Hz, 2H), 7.42 (d,  $J = 7.4$  Hz, 2H), 7.29 – 7.25 (m, 2H), 7.21 – 7.19 (m, 1H), 3.49 (s, 3H), 3.46 (s, 3H), 2.57 (d,  $J = 5.4$  Hz, 1H), 2.48 (d,  $J = 5.4$  Hz, 1H).

$^{13}\text{C NMR}$  (126 MHz,  $\text{CDCl}_3$ )  $\delta$  191.6, 167.5, 167.1, 147.2, 139.1, 135.2, 129.8, 129.5, 128.9, 128.6, 127.8, 52.6, 52.5, 46.9, 41.3, 23.8.

**IR** (KBr)  $\nu$  2954, 1734, 1701, 1605, 1436, 1338, 1248, 1118, 756, 701.

**HRMS** (APCI)  $m/z$ : Calcd for  $\text{C}_{20}\text{H}_{17}\text{O}_5$  ( $[\text{M}-\text{H}]^-$ ) 337.1081, found 337.1078.

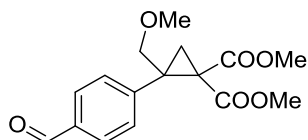

**1m** (QY-611)

**Dimethyl 2-(4-formylphenyl)-2-(methoxymethyl)cyclopropane-1,1-dicarboxylate**

0.45 g, 24% yield. Yellow oil.  $R_f = 0.19$  (petroleum ether/ethyl acetate, 3:1).

$^1\text{H NMR}$  (500 MHz,  $\text{CDCl}_3$ )  $\delta$  9.99 (s, 1H), 7.83 (d,  $J = 8.0$ , 2H), 7.50 (d,  $J = 8.0$ , 2H), 3.82 (s, 3H), 3.73 (d,  $J = 10.0$ , 1H), 3.59 (d,  $J = 10.0$ , 1H), 3.41 (s, 3H), 3.23 (s, 3H), 2.16 (d,  $J = 5.3$  Hz, 1H), 2.04 (d,  $J = 5.2$ , 1H).

$^{13}\text{C NMR}$  (126 MHz,  $\text{CDCl}_3$ )  $\delta$  191.8, 167.8, 167.7, 144.9, 135.6, 129.9, 129.6, 74.7, 58.8, 52.8, 52.6, 40.7, 38.4, 21.3.

**IR** (KBr)  $\nu$  2952, 1735, 1702, 1608, 1436, 1231, 1134, 1110, 837.

**HRMS** (APCI)  $m/z$ : Calcd for  $\text{C}_{16}\text{H}_{19}\text{O}_6$  ( $[\text{M}-\text{H}]^-$ ) 307.1176, found 307.1182.

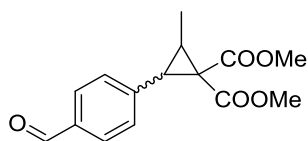

**1n** (QY-617)

**Dimethyl 2-(4-formylphenyl)-3-methylcyclopropane-1,1-dicarboxylate**

0.64 g, 29% yield. Colorless oil.  $R_f = 0.26$  (petroleum ether/ethyl acetate, 5:1).

$^1\text{H NMR}$  (500 MHz,  $\text{CDCl}_3$ )  $\delta$  9.97 (s, 1H), 7.79 (d,  $J = 7.9$  Hz, 2H), 7.37 (d,  $J = 7.9$  Hz, 2H), 3.82 (s, 3H), 3.41 (s, 3H), 3.10 (d,  $J = 8.0$  Hz, 1H), 2.64 – 2.58 (m, 1H), 1.30 (d,  $J = 6.3$  Hz, 3H).

$^{13}\text{C NMR}$  (126 MHz,  $\text{CDCl}_3$ )  $\delta$  191.8, 167.9, 167.2, 142.4, 135.3, 129.5, 129.2, 52.8, 52.4, 43.6, 37.6, 25.5, 12.5.

**IR** (KBr)  $\nu$  2954, 1730, 1702, 1437, 1297, 1215, 1142, 841.

**HRMS** (APCI)  $m/z$ : Calcd for  $\text{C}_{15}\text{H}_{17}\text{O}_5$  ( $[\text{M}-\text{H}]^-$ ) 277.1071, found 277.1077.



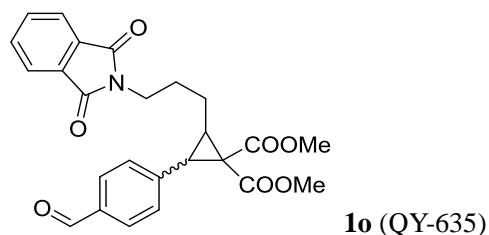

**dimethyl 2-(3-(1,3-dioxoisindolin-2-yl)propyl)-3-(4-formylphenyl)cyclopropane-1,1-dicarboxylate**

0.60 g, 22% yield. Colorless wax.  $R_f = 0.24$  (petroleum ether/dichloromethane/ethyl acetate/, 5:3:1).

$^1\text{H NMR}$  (400 MHz,  $\text{CDCl}_3$ )  $\delta$  9.97 (s, 1H), 7.85 – 7.83 (m, 2H), 7.78 (d,  $J = 8.0$  Hz, 2H), 7.73 – 7.71 (m, 2H), 7.37 (d,  $J = 8.0$  Hz, 2H), 3.80 (s, 3H), 3.77 – 3.73 (m, 2H), 3.39 (s, 3H), 3.14 (d,  $J = 8.1$  Hz, 1H), 2.63 (q,  $J = 7.6$  Hz, 1H), 1.90 – 1.84 (m, 2H), 1.62 (q,  $J = 7.5$  Hz, 2H).

$^{13}\text{C NMR}$  (101 MHz,  $\text{CDCl}_3$ )  $\delta$  191.8, 168.3, 167.9, 167.0, 142.1, 135.4, 134.0, 132.1, 129.6, 129.2, 123.2, 53.0, 52.5, 43.1, 37.4, 36.8, 30.5, 27.8, 24.8.

**IR** (KBr)  $\nu$  2946, 2845, 1711, 1608, 1437, 1397, 1297, 1211, 721.

**HRMS** (APCI)  $m/z$ : Calcd for  $\text{C}_{25}\text{H}_{22}\text{O}_7\text{N}$  ( $[\text{M}-\text{H}]^-$ ) 448.1402, found 448.1401.

**Synthesis of 1p.**

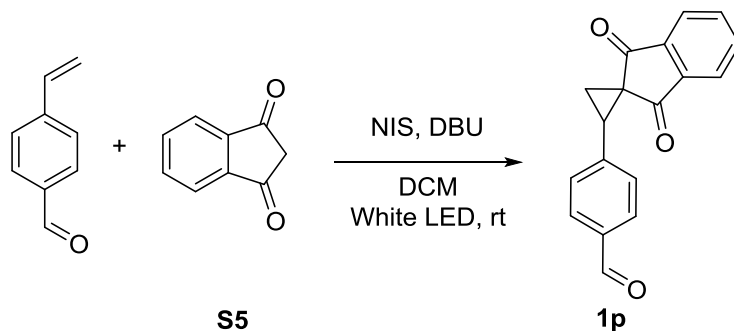

This procedure was performed according to the known literature<sup>3</sup>. Into an oven-dried reaction flask flushed with nitrogen was added **S5** (0.58g, 4 mmol), 4-vinylbenzaldehyde (1.0 mL, 8 mmol), NIS (1.80 g, 8 mmol), DBU (0.6 mL, 4 mmol), and DCM (40 mL). Then the reaction mixture was stirred for 2 h at room temperature under nitrogen atmosphere in the presence of white LED light. After the reaction was complete, the mixture was washed with aq.  $\text{Na}_2\text{S}_2\text{O}_3$  (30 mL) and extracted with DCM three times. The combined organic layers were dried with anhydrous  $\text{MgSO}_4$  and evaporated under vacuum. The crude mixture was purified by column chromatography on silica gel (petroleum ether/ethyl acetate, 5:1 – pure ethyl acetate) and then recrystallization from dichloromethane/petroleum ether to give product **1p**.

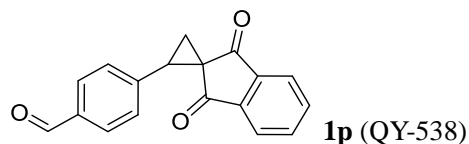

**4-(1',3'-dioxo-1',3'-dihydrospiro[cyclopropane-1,2'-inden]-2-yl)benzaldehyde**

0.81 g, 74% yield. White solid, m.p. 176-178 °C.  $R_f = 0.17$  (petroleum ether/ethyl acetate, 5:1).

$^1\text{H NMR}$  (500 MHz,  $\text{CDCl}_3$ )  $\delta$  9.99 (s, 1H), 8.00 (d,  $J = 8.0$  Hz, 1H), 7.84 – 7.77 (m, 5H), 7.48 (d,  $J = 7.9$  Hz, 2H), 3.47 (t,  $J = 8.8$  Hz, 1H), 2.51 (dd,  $J = 8.6, 4.4$  Hz, 1H), 2.35 (dd,  $J = 8.9, 4.3$  Hz, 1H).

$^{13}\text{C NMR}$  (126 MHz,  $\text{CDCl}_3$ )  $\delta$  197.6, 195.6, 191.7, 142.5, 141.6, 140.7, 135.7, 135.1, 135.0, 129.9, 129.5, 122.7, 122.6, 42.5, 39.9, 22.2.

**IR** (KBr)  $\nu$  2923, 1702, 1605, 1334, 1313, 1221, 1039, 768.

**HRMS** (APCI)  $m/z$ : Calcd for  $\text{C}_{18}\text{H}_{11}\text{O}_3$  ( $[\text{M}-\text{H}]^-$ ) 275.0714, found 275.0711.

**Synthesis of 1q.**

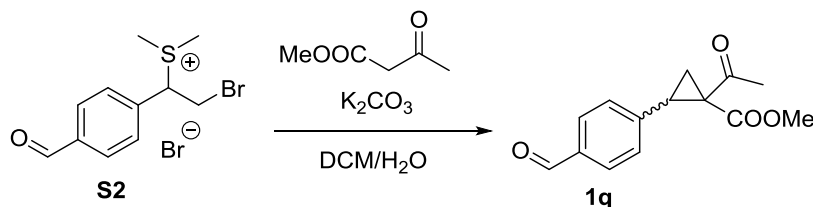

Prepared from procedure similar with **1q**.

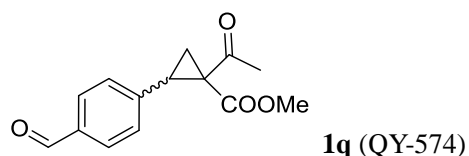

**Methyl 1-acetyl-2-(4-formylphenyl)cyclopropane-1-carboxylate**

0.53 g, 72% yield, 2:1 dr. Colorless oil.  $R_f = 0.26$  (petroleum ether/ethyl acetate, 5:1).

$^1\text{H NMR}$  (500 MHz,  $\text{CDCl}_3$ )  $\delta$  Major 9.99 (s, 1H), 7.81 – 7.79 (m, 2H), 7.36 (d,  $J = 7.8$  Hz, 2H), 3.39 (d,  $J = 19.3$  Hz, 3H), 3.36 (m, 1H), 2.46 (s, 3H), 2.28 (dd,  $J = 7.7, 4.8$  Hz, 1H), 1.81 – 1.74 (m, 1H).

Minor  $\delta$  9.97 (s, 1H), 7.83 – 7.77 (m, 2H), 7.30 (d,  $J = 7.8$  Hz, 2H), 3.83 (s, 3H), 3.35 (m, 1H), 2.38 (dd,  $J = 7.7, 5.4$  Hz, 1H), 1.97 (s, 3H), 1.81 – 1.74 (m, 1H).

$^{13}\text{C NMR}$  (126 MHz,  $\text{CDCl}_3$ )  $\delta$  201.6, 199.3, 191.8, 191.7, 170.5, 168.3, 142.1, 141.0, 135.5, 135.4, 129.7, 129.5, 129.4, 129.1, 52.9, 52.2, 44.8, 44.6, 34.6, 34.3, 30.3, 29.6, 21.7, 18.3.

**IR** (KBr)  $\nu$  2954, 1701, 1608, 1437, 1324, 1210, 1170, 1119, 838.

**HRMS** (APCI)  $m/z$ : Calcd for  $\text{C}_{14}\text{H}_{13}\text{O}_4$  ( $[\text{M}-\text{H}]^-$ ) 245.0819, found 245.0813.

### Synthesis of 1r.

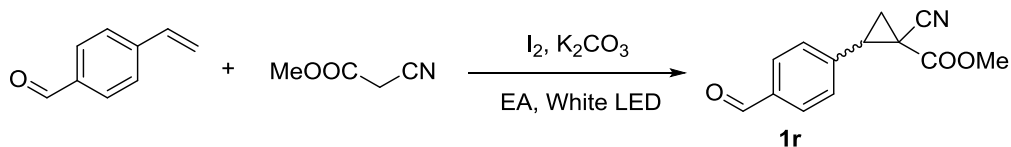

This procedure was performed according to the known literature<sup>4</sup>. A solution of 4-vinylbenzaldehyde (0.51 mL, 4 mmol), methyl 2-cyanoacetate (0.35 mL, 4 mmol),  $I_2$  (1.02 g, 4 mmol) and  $K_2CO_3$  (0.55 g, 4 mmol) in EtOAc (40 mL) was irradiated with White LED under a nitrogen atmosphere and stirred for 20 h. The reaction mixture was washed with aq.  $Na_2S_2O_3$ , extracted with EtOAc, and then the organic layer was dried over  $MgSO_4$  and concentrated in vacuo. Purification of the crude product by flash chromatography on silica gel (petroleum ether/acetone, 4:1) provided desired product **1r**.

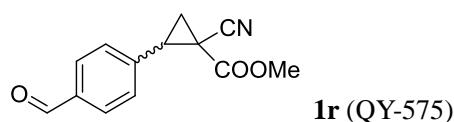

### Methyl 1-cyano-2-(4-formylphenyl)cyclopropane-1-carboxylate

0.49 g, 54% yield, 6:1 dr. White solid, m.p. 96-98 °C.  $R_f$  = 0.28 (petroleum ether/acetone, 4:1).

$^1H$  NMR (500 MHz,  $CDCl_3$ ) Major  $\delta$  10.03 (s, 1H), 7.91 (d,  $J$  = 8.0 Hz, 2H), 7.46 (d,  $J$  = 7.7 Hz, 2H), 3.89 (s, 3H), 3.24 (t,  $J$  = 8.7 Hz, 1H), 2.25 (dd,  $J$  = 9.0, 5.5 Hz, 1H), 2.17 (dd,  $J$  = 8.3, 5.5 Hz, 1H).

Minor  $\delta$  10.00 (s, 1H), 7.85 (d,  $J$  = 8.0 Hz, 2H), 7.46 (d,  $J$  = 7.7 Hz, 2H), 3.59 (s, 3H), 3.34 (t,  $J$  = 9.1 Hz, 1H), 2.42 (dd,  $J$  = 8.8, 5.8 Hz, 1H), 2.17 (m, 1H).

$^{13}C$  NMR (126 MHz,  $CDCl_3$ )  $\delta$  191.5, 191.5, 167.4, 164.4, 139.5, 138.7, 136.4, 136.2, 130.1, 130.0, 129.7, 129.0, 118.4, 115.8, 53.9, 53.5, 36.1, 34.9, 23.0, 23.0, 21.0, 20.5.

IR (KBr)  $\nu$  2242, 1738, 1699, 1608, 1443, 1299, 1267, 1207, 1158.

HRMS (APCI)  $m/z$ : Calcd for  $C_{13}H_{10}O_3N$  ( $[M-H]^+$ ) 228.0666, found 228.0660.

### Synthesis of 1s.

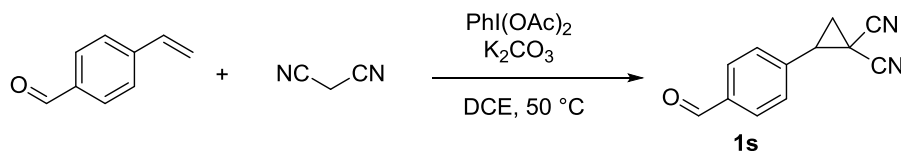

This procedure was performed according to the known literature<sup>5</sup>.  $PhI(OAc)_2$  (4.25 g, 13.2 mmol),  $K_2CO_3$  (1.82 g, 13.2 mmol), malononitrile (0.48 g, 7.2 mmol) and 4-vinylbenzaldehyde (0.76 mL, 6 mmol) were dissolved in DCE (30 mL). The mixture was stirred at 50 °C for 2 h (monitored by TLC). Then the reaction mixture was cooled to room temperature. The undissolved solid was removed by filtration through a pad of Celite. The filtrate was concentrated under reduced pressure, and the residue was purified by flash silica gel column chromatography (petroleum

ether/acetone, 4:1) to give **1s**.

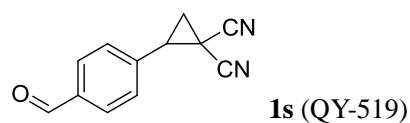

### 2-(4-formylphenyl)cyclopropane-1,1-dicarbonitrile

0.69 g, 58% yield. White solid, m.p. 82-84 °C.  $R_f$  = 0.31 (petroleum ether/acetone, 4:1).

$^1\text{H NMR}$  (500 MHz,  $\text{CDCl}_3$ )  $\delta$  10.05 (s, 1H), 7.95 (d,  $J$  = 8.0 Hz, 2H), 7.49 (d,  $J$  = 7.9 Hz, 2H), 3.36 (t,  $J$  = 9.0 Hz, 1H), 2.34 (d,  $J$  = 8.9 Hz, 2H).

$^{13}\text{C NMR}$  (126 MHz,  $\text{CDCl}_3$ )  $\delta$  191.2, 137.0, 136.9, 130.3, 129.1, 114.8, 112.6, 34.5, 22.5, 7.6.

**IR** (KBr)  $\nu$  2248, 1700, 1609, 1574, 1312, 1211, 1172, 987, 836.

**HRMS** (APCI)  $m/z$ : Calcd for  $\text{C}_{12}\text{H}_7\text{ON}_2$  ( $[\text{M}-\text{H}]^-$ ) 195.0564, found 195.0555.

### 3. Preliminary reaction optimization using MeOH.

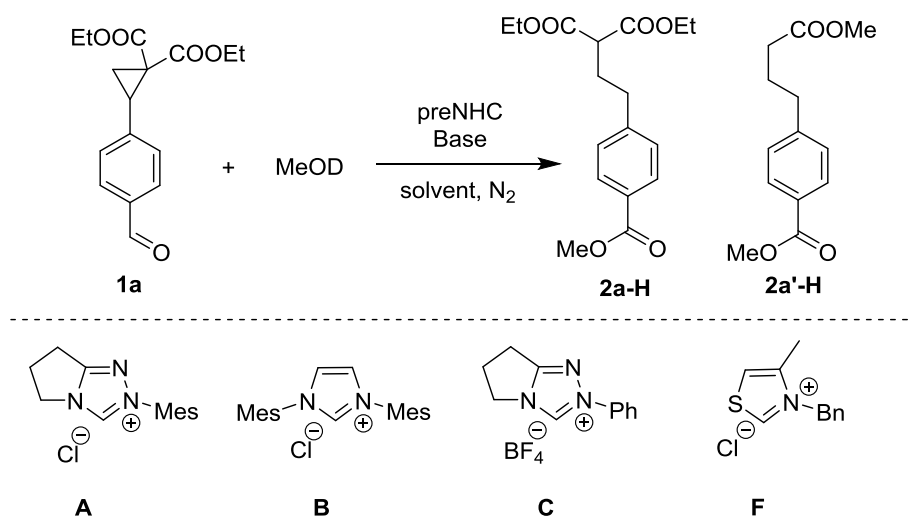

| Entry | PreNHC (20 mol%) | Base (1.5 equiv)                  | T (°C) | Solvent | Yield/3a (%) | Yield/3a' (%) |
|-------|------------------|-----------------------------------|--------|---------|--------------|---------------|
| 1     | <b>A</b>         | $\text{Cs}_2\text{CO}_3$          | rt     | THF     | 0            | 0             |
| 2     | <b>A</b>         | $\text{Cs}_2\text{CO}_3$          | 70     | THF     | trace        | 0             |
| 3     | <b>A</b>         | $\text{Cs}_2\text{CO}_3$          | 100    | THF     | 0            | 30            |
| 4     | <b>A</b>         | KOAc                              | 100    | THF     | 74           | 0             |
| 5     | <b>B</b>         | KOAc                              | 100    | THF     | 16           | 0             |
| 6     | <b>C</b>         | KOAc                              | 100    | THF     | 60           | 0             |
| 7     | <b>F</b>         | KOAc                              | 100    | THF     | 7            | 0             |
| 8     | <b>A</b>         | $\text{Cs}_2\text{CO}_3$ (0.2 eq) | 100    | THF     | 51           | 0             |

|    |          |                                |     |                    |       |       |
|----|----------|--------------------------------|-----|--------------------|-------|-------|
| 9  | <b>A</b> | K <sub>3</sub> PO <sub>4</sub> | 100 | THF                | 0     | trace |
| 10 | <b>A</b> | DIPEA                          | 100 | THF                | trace | 0     |
| 11 | <b>A</b> | KOAc                           | 100 | CH <sub>3</sub> CN | 66    | 0     |
| 12 | <b>A</b> | KOAc                           | 100 | PhMe               | 28    | 0     |
| 13 | <b>A</b> | KOAc                           | 100 | DCE                | 34    | 0     |

Reaction conditions: **1a** (0.3 mmol), **preNHC D** (20 mol%), Base (1.5 equiv), and MeOH (50 equiv) in solvent (4 mL) at indicated temperature for 12 h. Isolated yields reported.

#### 4. General procedure for 1,3-deuteration via ring opening of DA cyclopropanes.

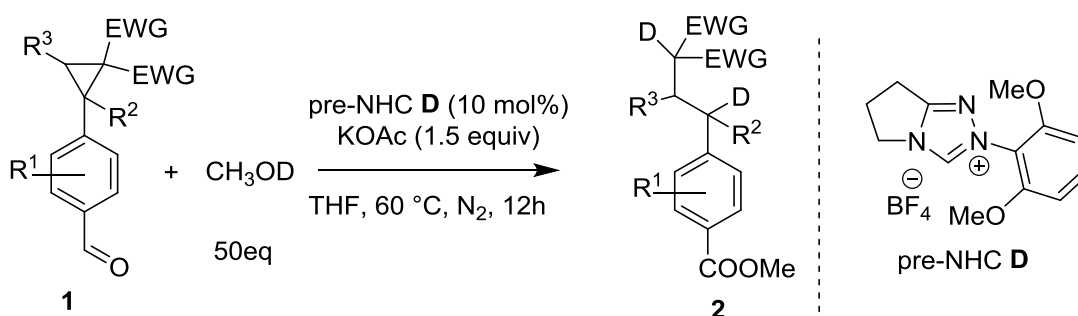

Typical procedure: To an oven-dried 25 mL Schlenk tube equipped with a stir bar was charged with donor-acceptor cyclopropane **1a** (R<sup>1</sup>, R<sup>2</sup>, R<sup>3</sup> = H, EWG = COOEt, 58.0 mg, 0.2 mmol), pre-NHC **D** (6.7 mg, 0.02 mmol) and KOAc (29.4 mg, 0.3 mmol). This tube was closed with a septum, evacuated, backfilled with nitrogen three times. To this mixture was added CH<sub>3</sub>OD (0.4 mL, 10 mmol) freshly distilled dry THF (4 mL). The reaction mixture was stirred at 60 °C until the full consumption of **1a** (Typically within 12 h). The reaction mixture was concentrated under reduced pressure, and the residue was purified by column chromatography on silica gel (petroleum ether/EtOAc, 5:1 as the eluent) to give the product **2a** (45.7 mg, 71% yield). The non-deuterated samples for NMR Spectroscopy analysis were prepared using MeOH under the same conditions.

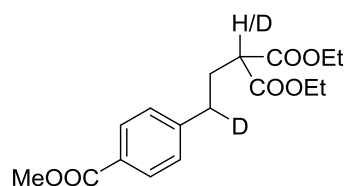

**2a** (QY-565-1)

**Diethyl 2-(2-(4-(methoxycarbonyl)phenyl)ethyl-2-*d*)malonate-*d***

46 mg, 71% yield. Colorless oil.  $R_f = 0.42$  (petroleum ether/ethyl acetate, 5:1).

$^1\text{H NMR}$  (400 MHz,  $\text{CDCl}_3$ )  $\delta$  7.96 (d,  $J = 8.2$  Hz, 2H), 7.26 (d,  $J = 8.2$  Hz, 2H), 4.23 – 4.17 (m, 4H), 3.90 (s, 3H), 3.32 (t,  $J = 7.4$  Hz, 0.91H, 9% D), 2.74 – 2.68 (m, 1.16H, 84% D), 2.22 (t,  $J = 7.6$  Hz, 2H), 1.27 (t,  $J = 7.1$  Hz, 6H).

$^{13}\text{C NMR}$  (101 MHz,  $\text{CDCl}_3$ )  $\delta$  169.1, 167.0, 146.1, 129.8, 128.6, 128.3, 61.4, 52.0, 51.2, 33.3, 33.2, 33.0, 32.8, 29.9, 14.1.

**IR** (KBr)  $\nu$  2983, 1725, 1612, 1436, 1279, 1179, 1108.

**HRMS** (ESI)  $m/z$ : Calcd for  $\text{C}_{17}\text{H}_{21}\text{DNaO}_6$  ( $[\text{M}+\text{Na}]^+$ ) 346.1377, found 346.1386.

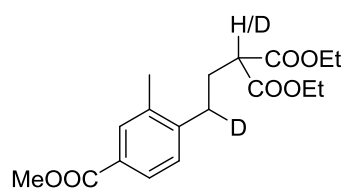

**2b** (QY-697)

**Diethyl 2-(2-(4-(methoxycarbonyl)-2-methylphenyl)ethyl-2-*d*)malonate-*d***

55 mg, 81% yield. Colorless oil.  $R_f = 0.40$  (petroleum ether/ethyl acetate, 5:1).

$^1\text{H NMR}$  (400 MHz,  $\text{CDCl}_3$ )  $\delta$  7.82 – 7.78 (m, 2H), 7.20 (d,  $J = 7.9$  Hz, 1H), 4.24 – 4.18 (m, 4H), 3.89 (s, 3H), 3.38 (t,  $J = 7.3$  Hz, 1H, <5% D), 2.72 – 2.66 (m, 1.22H, 78% D), 2.36 (s, 3H), 2.15 (t,  $J = 7.8$  Hz, 2H), 1.28 (t,  $J = 7.1$  Hz, 6H).

$^{13}\text{C NMR}$  (101 MHz,  $\text{CDCl}_3$ )  $\delta$  169.2, 167.2, 144.5, 136.3, 131.4, 129.1, 128.2, 127.3, 61.5, 52.0, 51.6, 31.0, 30.8, 30.6, 30.5, 28.8, 28.7, 19.1, 14.1.

**IR** (KBr)  $\nu$  2981, 1725, 1438, 1370, 1294, 1268, 1195, 1025.

**HRMS** (ESI)  $m/z$ : Calcd for  $\text{C}_{18}\text{H}_{23}\text{DNaO}_6$  ( $[\text{M}+\text{Na}]^+$ ) 360.1533, found 360.1525.

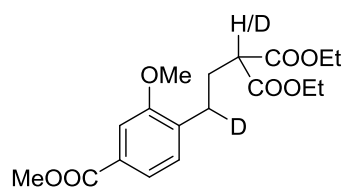

**2c** (QY-680)

**Diethyl 2-(2-(2-methoxy-4-(methoxycarbonyl)phenyl)ethyl-2-*d*)malonate-*d***

50 mg, 71% yield. Colorless oil.  $R_f = 0.29$  (petroleum ether/ethyl acetate, 5:1).

**<sup>1</sup>H NMR** (500 MHz, CDCl<sub>3</sub>) δ 7.59 – 7.57 (m, 1H), 7.49 (s, 1H), 7.18 (d, *J* = 7.7 Hz, 1H), 4.22 – 4.17 (m, 4H), 3.91 (s, 3H), 3.87 (s, 3H), 3.32 (t, *J* = 7.5 Hz, 0.99H, <5% D), 2.73 – 2.68 (m, 1.20H, 80% D), 2.19 (q, *J* = 7.5 Hz, 2H), 1.27 (t, *J* = 7.1 Hz, 6H).

**<sup>13</sup>C NMR** (126 MHz, CDCl<sub>3</sub>) δ 169.4, 167.1, 157.4, 134.7, 129.9, 129.5, 122.0, 110.9, 61.3, 55.4, 52.1, 51.5, 28.4, 28.3, 28.0, 27.8, 27.7, 27.5, 14.1.

**IR** (KBr) ν 2982, 1722, 1436, 1410, 1289, 1272, 1036, 760.

**HRMS** (ESI) *m/z*: Calcd for C<sub>18</sub>H<sub>23</sub>DNaO<sub>7</sub> ([M+Na]<sup>+</sup>) 376.1482, found 376.1475.

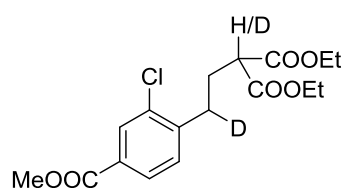

**2d** (QY-690)

**Diethyl 2-(2-(2-chloro-4-(methoxycarbonyl)phenyl)ethyl-2-*d*)malonate-*d***

41 mg, 57% yield. Colorless oil. *R*<sub>f</sub> = 0.39 (petroleum ether/ethyl acetate, 5:1).

**<sup>1</sup>H NMR** (400 MHz, CDCl<sub>3</sub>) δ 8.02 (d, *J* = 1.5 Hz, 1H), 7.86 (dd, *J* = 8.0, 1.6 Hz, 1H), 7.31 (d, *J* = 8.0 Hz, 1H), 4.24 – 4.18 (m, 4H), 3.91 (s, 3H), 3.36 (t, *J* = 7.4 Hz, 1H, <5% D), 2.86 – 2.80 (m, 1.17H, 83% D), 2.22 (q, *J* = 7.7 Hz, 2H), 1.28 (t, *J* = 7.1 Hz, 6H).

**<sup>13</sup>C NMR** (101 MHz, CDCl<sub>3</sub>) δ 169.05, 165.9, 143.6, 134.2, 130.7, 130.5, 129.9, 128.0, 61.5, 52.3, 51.4, 31.2, 31.1, 30.9, 30.8, 28.1, 14.1.

**IR** (KBr) ν 2983, 1729, 1438, 1290, 1258, 1154, 1045, 763.

**HRMS** (ESI) *m/z*: Calcd for C<sub>17</sub>H<sub>20</sub>DClNaO<sub>6</sub> ([M+Na]<sup>+</sup>) 380.0987, found 380.0979.

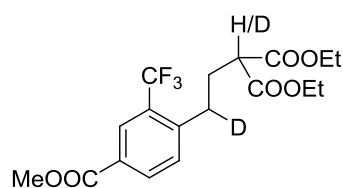

**2e** (QY-717)

**Diethyl 2-(2-(4-(methoxycarbonyl)-2-(trifluoromethyl)phenyl)ethyl-2-*d*)malonate-*d***

50 mg, 64% yield. Colorless oil. *R*<sub>f</sub> = 0.35 (petroleum ether/ethyl acetate, 10:1).

**<sup>1</sup>H NMR** (500 MHz, CDCl<sub>3</sub>) δ 8.30 (s, 1H), 8.14 (d, *J* = 8.0, 1H), 7.47 (d, *J* = 8.0 Hz, 1H), 4.24 – 4.20 (m, 4H), 3.94 (s, 3H), 3.42 (t, *J* = 7.3 Hz, 0.97H, <5% D), 2.91 – 2.85 (m, 1.17H, 83% D), 2.21 (t, *J* = 7.8 Hz, 2H), 1.29 (t, *J* = 7.1 Hz, 6H).

**<sup>13</sup>C NMR** (126 MHz, CDCl<sub>3</sub>) δ 169.0, 165.8, 144.9, 132.8, 131.5, 128.9 (q, <sup>2</sup>*J*<sub>CF</sub> = 30.6 Hz), 128.6, 127.5 (q, <sup>3</sup>*J*<sub>CF</sub> = 5.6 Hz), 124.0 (q, <sup>1</sup>*J*<sub>CF</sub> = 274.2 Hz), 61.6, 52.4, 51.6, 30.2, 30.1, 30.0, 29.9, 29.8, 14.1.

**<sup>19</sup>F NMR** (376 MHz, CDCl<sub>3</sub>) δ -60.0 (s)

**IR** (KBr) ν 2985, 1731, 1620, 1442, 1327, 1257, 1123, 1054, 761.

**HRMS** (ESI)  $m/z$ : Calcd for  $C_{18}H_{20}DF_3NaO_6$  ( $[M+Na]^+$ ) 414.1251, found 414.1248.

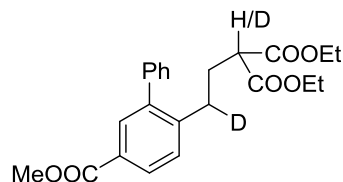

**2f** (QY-705)

**Diethyl 2-(2-(5-(methoxycarbonyl)-[1,1'-biphenyl]-2-yl)ethyl-2-*d*)malonate-*d***

64 mg (0.2mmol scale), 80% yield. Colorless oil.  $R_f$  = 0.33 (petroleum ether/ethyl acetate, 5:1).

**$^1H$  NMR** (500 MHz,  $CDCl_3$ )  $\delta$  7.96 (dd,  $J$  = 7.9, 1.6 Hz, 1H), 7.89 (d,  $J$  = 1.5 Hz, 1H), 7.44 – 7.35 (m, 4H), 7.29 – 7.26 (m, 2H), 4.10 (q,  $J$  = 7.1 Hz, 4H), 3.90 (s, 3H), 3.18 (t,  $J$  = 7.4 Hz, 0.94H, 6% D), 2.70 – 2.65 (m, 1.18H, 82% D), 2.05 (t,  $J$  = 7.8 Hz, 2H), 1.20 (t,  $J$  = 7.1 Hz, 6H).

**$^{13}C$  NMR** (126 MHz,  $CDCl_3$ )  $\delta$  169.0, 167.0, 143.6, 142.2, 140.5, 131.4, 129.5, 129.1, 128.6, 128.3, 128.1, 127.3, 61.4, 52.1, 51.5, 30.7, 30.5, 30.4, 30.2, 29.7, 29.6, 14.0.

**IR** (KBr)  $\nu$  2924, 1724, 1439, 1306, 1240, 1153, 1109, 1025.

**HRMS** (ESI)  $m/z$ : Calcd for  $C_{23}H_{25}DNaO_6$  ( $[M+Na]^+$ ) 422.1690, found 422.1686.

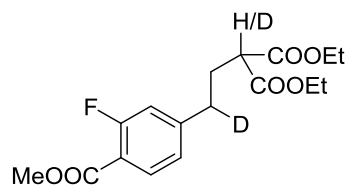

**2g** (QY-661)

**Diethyl 2-(2-(3-fluoro-4-(methoxycarbonyl)phenyl)ethyl-2-*d*)malonate-*d***

27 mg, 39% yield. Colorless oil.  $R_f$  = 0.34 (petroleum ether/ethyl acetate, 10:1).

**$^1H$  NMR** (500 MHz,  $CDCl_3$ )  $\delta$  7.86 (t,  $J$  = 7.8 Hz, 1H), 7.04 – 7.02 (m, 1H), 6.98 (d,  $J$  = 11.5 Hz, 1H), 4.23 – 4.18 (m, 4H), 3.92 (s, 3H), 3.31 (t,  $J$  = 7.4 Hz, 0.90H, 10% D), 2.72 – 2.67 (m, 1.15H, 85% D), 2.24 – 2.20 (m, 2H), 1.28 (t,  $J$  = 7.1 Hz, 6H).

**$^{13}C$  NMR** (126 MHz,  $CDCl_3$ )  $\delta$  169.0, 164.8 (d,  $^3J_{CF}$  = 3.6 Hz), 162.0 (d,  $^1J_{CF}$  = 206.2 Hz), 148.6, 132.3, 124.2 (d,  $^4J_{CF}$  = 3.0 Hz), 116.9 (d,  $^2J_{CF}$  = 22.4 Hz), 116.5 (d,  $^2J_{CF}$  = 10.0 Hz), 61.6, 52.2, 51.1, 33.0, 29.7, 29.6, 29.5, 14.1.

**$^{19}F$  NMR** (376 MHz,  $CDCl_3$ )  $\delta$  -109.6 (s)

**IR** (KBr)  $\nu$  2921, 1730, 1623, 1432, 1296, 1152, 1021.

**HRMS** (ESI)  $m/z$ : Calcd for  $C_{17}H_{20}DFNaO_6$  ( $[M+Na]^+$ ) 364.1283, found 364.1278.

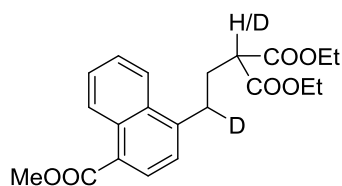

**2h** (QY-696)



**Diethyl 2-(2-(4-(methoxycarbonyl)naphthalen-1-yl)ethyl-2-*d*)malonate-*d***

51 mg, 68% yield. Colorless oil.  $R_f = 0.33$  (petroleum ether/ethyl acetate, 5:1).

$^1\text{H NMR}$  (500 MHz,  $\text{CDCl}_3$ )  $\delta$  8.96 – 8.94 (m, 1H), 8.15 – 8.13 (m, 1H), 8.09 (d,  $J = 7.4$  Hz, 1H), 7.62 – 7.57 (m, 2H), 7.36 (d,  $J = 7.4$  Hz, 1H), 4.25 – 4.19 (m, 4H), 3.99 (s, 3H), 3.45 (t,  $J = 7.3$  Hz, 0.82H, 18% D), 3.19 – 3.13 (m, 1.17H, 83% D), 2.34 (t,  $J = 7.7$  Hz, 2H), 1.28 (t,  $J = 7.1$  Hz, 6H).

$^{13}\text{C NMR}$  (126 MHz,  $\text{CDCl}_3$ )  $\delta$  169.2, 168.0, 142.7, 132.1, 131.7, 129.9, 127.4, 126.5, 126.4, 126.1, 125.2, 124.1, 61.5, 52.1, 51.6, 31.2, 31.0, 30.9, 30.7, 29.6, 29.5, 29.4, 14.1.

**IR** (KBr)  $\nu$  2983, 1725, 1588, 1516, 1437, 1250, 1129, 1037, 777.

**HRMS** (ESI)  $m/z$ : Calcd for  $\text{C}_{21}\text{H}_{23}\text{DNaO}_6$  ( $[\text{M}+\text{Na}]^+$ ) 396.1533, found 396.1528.

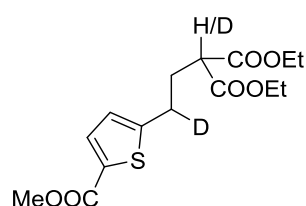

**2i** (QY-704)

**Diethyl 2-(2-(5-(methoxycarbonyl)thiophen-2-yl)ethyl-2-*d*)malonate-*d***

28 mg, 42% yield. Yellow oil.  $R_f = 0.31$  (petroleum ether/ethyl acetate, 5:1).

$^1\text{H NMR}$  (500 MHz,  $\text{CDCl}_3$ )  $\delta$  7.64 (d,  $J = 3.6$  Hz, 1H), 6.82 (d,  $J = 3.6$  Hz, 1H), 4.23 – 4.19 (m, 4H), 3.86 (s, 3H), 3.38 (t,  $J = 7.4$  Hz, 0.99H, <5% D), 2.92 – 2.87 (m, 1.21H, 79% D), 2.27 (t,  $J = 7.6$  Hz, 2H), 1.28 (t,  $J = 7.1$  Hz, 6H).

$^{13}\text{C NMR}$  (126 MHz,  $\text{CDCl}_3$ )  $\delta$  168.9, 162.6, 151.2, 133.7, 131.4, 125.9, 61.6, 52.0, 50.83, 50.81, 30.14, 30.06, 27.9, 27.7, 27.5, 27.4, 14.1.

**IR** (KBr)  $\nu$  2982, 1715, 1460, 1290, 1260, 1154, 1094, 1025, 750.

**HRMS** (ESI)  $m/z$ : Calcd for  $\text{C}_{15}\text{H}_{19}\text{DNaO}_6\text{S}$  ( $[\text{M}+\text{Na}]^+$ ) 352.0941, found 352.0937.

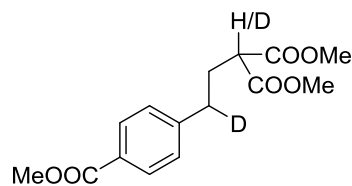

**2j** (QY-614)

**Dimethyl 2-(2-(4-(methoxycarbonyl)phenyl)ethyl-2-*d*)malonate-*d***

36 mg, 60% yield. Colorless oil.  $R_f = 0.29$  (petroleum ether/ethyl acetate, 5:1).

$^1\text{H NMR}$  (500 MHz,  $\text{CDCl}_3$ )  $\delta$  7.97 (d,  $J = 7.9$  Hz, 2H), 7.26 (d,  $J = 7.9$  Hz, 2H), 3.91 (s, 3H), 3.74 (s, 6H), 3.37 (t,  $J = 7.4$  Hz, 0.99H, <5% D), 2.73 – 2.68 (m, 1.16H, 84% D), 2.24 (t,  $J = 7.5$  Hz, 2H).

$^{13}\text{C NMR}$  (126 MHz,  $\text{CDCl}_3$ )  $\delta$  169.5, 167.0, 145.9, 129.8, 128.6, 128.3, 52.6, 52.1, 50.8, 33.3, 33.1, 33.0, 32.8, 30.0, 29.9.

**IR** (KBr)  $\nu$  2955, 1732, 1649, 1613, 1435, 1280, 1108, 760.

**HRMS** (APCI)  $m/z$ : Calcd for  $\text{C}_{15}\text{H}_{18}\text{DO}_6$  ( $[\text{M}+\text{H}]^+$ ) 296.1239, found 296.1236.

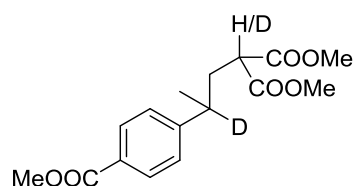

**2k** (QY-615)

**Dimethyl 2-(2-(4-(methoxycarbonyl)phenyl)propyl-2-*d*)malonate-*d***

32 mg, 52% yield. Colorless oil.  $R_f = 0.33$  (petroleum ether/ethyl acetate, 5:1).

$^1\text{H NMR}$  (500 MHz,  $\text{CDCl}_3$ )  $\delta$  7.98 (d,  $J = 8.0$  Hz, 2H), 7.24 (d,  $J = 8.0$  Hz, 2H), 3.91 (d,  $J = 1.8$  Hz, 3H), 3.74 (s, 3H), 3.64 (s, 3H), 3.18 (dd,  $J = 8.7, 6.4$  Hz, 0.99H, <5% D), 2.81 – 2.77 (m, 0.32H, 68% D), 2.27 – 2.15 (m, 2H), 1.29 (s, 3H).

$^{13}\text{C NMR}$  (126 MHz,  $\text{CDCl}_3$ )  $\delta$  169.73, 169.64, 167.0, 150.72, 150.68, 130.0, 128.5, 127.18, 127.16, 52.59, 52.57, 52.1, 49.9, 49.8, 37.9, 37.6, 37.5, 37.3, 36.7, 36.6, 22.2, 22.1.

**IR** (KBr)  $\nu$  2956, 1731, 1611, 1436, 1281, 1155, 1113, 776, 709.

**HRMS** (ESI)  $m/z$ : Calcd for  $\text{C}_{16}\text{H}_{20}\text{DO}_6$  ( $[\text{M}+\text{H}]^+$ ) 310.1395, found 310.1400.

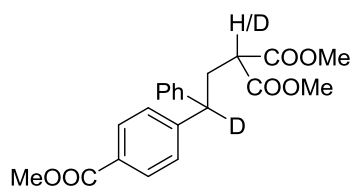

**2l** (QY-645)

**Dimethyl 2-(2-(4-(methoxycarbonyl)phenyl)-2-phenylethyl-2-*d*)malonate-*d***

58 mg, 78% yield. Yellow oil.  $R_f = 0.31$  (petroleum ether/ethyl acetate, 5:1).

$^1\text{H NMR}$  (500 MHz,  $\text{CDCl}_3$ )  $\delta$  7.96 (d,  $J = 8.0$  Hz, 2H), 7.32 – 7.21 (m, 7H), 4.03 – 4.00 (m, 0.17H, 83% D), 3.88 (s, 3H), 3.70 (s, 3H), 3.69 (s, 3H), 3.26 (t,  $J = 7.3$  Hz, 0.73H, 27% D), 2.68 (d,  $J = 7.2$  Hz, 2H).

$^{13}\text{C NMR}$  (126 MHz,  $\text{CDCl}_3$ )  $\delta$  169.5, 166.9, 148.6, 142.3, 130.0, 128.8, 128.6, 127.89, 127.86, 126.9, 52.6, 52.1, 49.8, 48.7, 48.2, 48.1, 34.1.

**IR** (KBr)  $\nu$  2954, 1725, 1611, 1435, 1280, 1155, 1110, 707.

**HRMS** (ESI)  $m/z$ : Calcd for  $\text{C}_{21}\text{H}_{21}\text{DNaO}_6$  ( $[\text{M}+\text{Na}]^+$ ) 394.1377, found 394.1372.

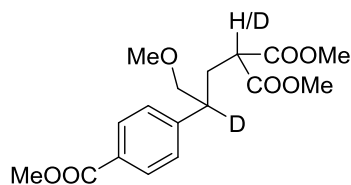

**2m** (QY-622)

**Dimethyl 2-(3-methoxy-2-(4-(methoxycarbonyl)phenyl)propyl-2-*d*)malonate-*d***

35 mg, 52% yield. Colorless oil.  $R_f = 0.30$  (petroleum ether/ethyl acetate, 3:1).

$^1\text{H NMR}$  (500 MHz,  $\text{CDCl}_3$ )  $\delta$  7.99 (d,  $J = 8.2$  Hz, 2H), 7.27 – 7.26 (m, 2H), 3.91 (s, 3H), 3.73 (s, 3H), 3.61 (s, 3H), 3.53 – 3.52 (m, 2H), 3.29 (s, 3H), 3.23 (dd,  $J = 9.2, 5.6$  Hz, 1H, <5% D), 2.99 – 2.93 (m, 0.19H, 81% D), 2.45 (dd,  $J = 14.1, 9.4$  Hz, 1H), 2.17 (dd,  $J = 14.1, 5.6$  Hz, 1H).

$^{13}\text{C NMR}$  (126 MHz,  $\text{CDCl}_3$ )  $\delta$  169.6, 169.5, 166.9, 146.6, 129.9, 129.0, 128.0, 58.9, 52.6, 52.5, 52.1, 49.6, 31.6.

IR (KBr)  $\nu$  2921, 2850, 1731, 1718, 1435, 1279, 1106, 1018.

HRMS (ESI)  $m/z$ : Calcd for  $\text{C}_{17}\text{H}_{22}\text{DO}_7$  ( $[\text{M}+\text{H}]^+$ ) 340.1501, found 340.1502.

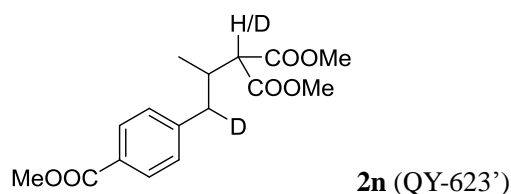

**Dimethyl 2-(1-(4-(methoxycarbonyl)phenyl)propan-2-yl-1-*d*)malonate-*d***

44 mg, 72% yield. Temperature: 100 °C. Reaction time: 60 h. Colorless oil.  $R_f = 0.23$  (petroleum ether/ethyl acetate, 7:1).

$^1\text{H NMR}$  (500 MHz,  $\text{CDCl}_3$ )  $\delta$  7.96 (d,  $J = 8.1$  Hz, 2H), 7.26 (d,  $J = 8.0$  Hz, 2H), 3.91 (s, 3H), 3.75 (s, 3H), 3.74 (s, 3H), 3.32 (d,  $J = 7.4, 0.81\text{H}$ , 19% D), 2.90 – 2.86 (m, 0.72H, 28% D), 2.60 – 2.55 (m, 1H), 2.50 – 2.45 (m, 0.43H, 57% D), 0.94 – 0.93 (m, 3H).

$^{13}\text{C NMR}$  (126 MHz,  $\text{CDCl}_3$ )  $\delta$  169.2, 168.9, 167.1, 145.3, 129.7, 129.3, 128.3, 56.5, 52.45, 52.38, 52.0, 40.6, 40.4, 40.2, 40.1, 35.3, 35.2, 35.1, 16.8.

IR (KBr)  $\nu$  2954, 1722, 1645, 1435, 1384, 1279, 688, 560.

HRMS (ESI)  $m/z$ : Calcd for  $\text{C}_{16}\text{H}_{18}\text{D}_2\text{NaO}_6$  ( $[\text{M}+\text{Na}]^+$ ) 333.1278, found 333.1276.

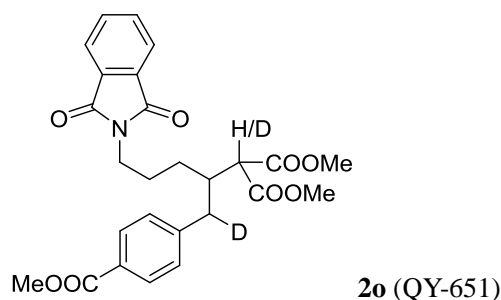

**Dimethyl 2-(1-(4-(methoxycarbonyl)phenyl)propan-2-yl-1-*d*)malonate-*d***

25 mg (0.1 mmol scale), 52% yield. Temperature: 100 °C. Reaction time: 24 h. Colorless wax.  $R_f = 0.19$  (petroleum ether/ethyl acetate, 3:1).

$^1\text{H NMR}$  (500 MHz,  $\text{CDCl}_3$ )  $\delta$  7.88 (d,  $J = 8.1$  Hz, 2H), 7.82 (dd,  $J = 5.4, 3.0$  Hz, 2H), 7.71 (dd,  $J = 5.5, 3.0$  Hz, 2H), 7.23 (d,  $J = 8.1$  Hz, 2H), 3.89 (s, 3H), 3.72 (s, 3H), 3.68 (s, 3H), 3.61 (t,  $J = 7.1$  Hz, 2H), 3.43 – 3.41 (m, 0.93H, 7% D), 2.82 – 2.78 (m, 0.63H, 37% D), 2.67 – 2.63 (m, 0.55H, 45% D), 2.52 – 2.48 (m, 1H), 1.76 – 1.66 (m, 2H), 1.47 – 1.36 (m, 2H).

$^{13}\text{C}$  NMR (126 MHz,  $\text{CDCl}_3$ )  $\delta$  169.0, 168.9, 168.3, 166.9, 145.1, 133.9, 132.0, 129.7, 129.2, 128.3, 123.2, 53.8, 52.44, 52.40, 52.0, 39.7, 37.7, 37.5, 37.0, 29.7, 27.8, 25.5.

IR (KBr)  $\nu$  2953, 2924, 1711, 1436, 1397, 1280, 1108, 1021, 721.

HRMS (ESI)  $m/z$ : Calcd for  $\text{C}_{26}\text{H}_{26}\text{DNNaO}_8$  ( $[\text{M}+\text{Na}]^+$ ) 505.1697, found 505.1691.

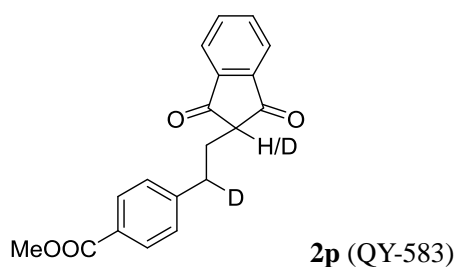

**Methyl 4-(2-(1,3-dioxo-2,3-dihydro-1H-inden-2-yl-2-*d*)ethyl-1-*d*)benzoate**

29 mg (0.2 mmol scale), 47% yield. White solid, m.p. 114-116 °C.  $R_f$  = 0.33 (petroleum ether/dichloromethane/ethyl acetate, 9:3:1).

$^1\text{H}$  NMR (500 MHz,  $\text{CDCl}_3$ )  $\delta$  7.98 – 7.92 (m, 4H), 7.86 – 7.84 (m, 2H), 7.29 (d,  $J$  = 8.1 Hz, 2H), 3.89 (s, 3H), 3.00 (t,  $J$  = 6.4 Hz, 0.95 H, <5% D), 2.88 (t,  $J$  = 7.9 Hz, 1.06H, 94% D), 2.24 (t,  $J$  = 6.9 Hz, 2H).

$^{13}\text{C}$  NMR (126 MHz,  $\text{CDCl}_3$ )  $\delta$  199.5, 166.0, 145.2, 141.2, 134.7, 128.8, 127.7, 127.2, 122.2, 51.2, 51.0, 31.4, 31.2, 31.0, 30.9, 27.2.

IR (KBr)  $\nu$  1702, 1593, 1281, 1179, 1110, 753, 709.

HRMS (ESI)  $m/z$ : Calcd for  $\text{C}_{19}\text{H}_{14}\text{DO}_4$  ( $[\text{M}-\text{H}]^-$ ) 308.1039, found 308.1047.

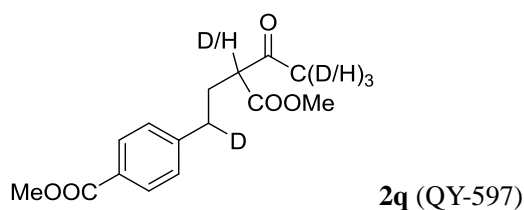

**Methyl 4-(3-(methoxycarbonyl)-4-oxopentyl-1,3,5,5,5-*d*5)benzoate**

39 mg, 70% yield. Colorless oil.  $R_f$  = 0.22 (petroleum ether/ethyl acetate, 5:1).

$^1\text{H}$  NMR (500 MHz,  $\text{CDCl}_3$ )  $\delta$  7.96 (d,  $J$  = 7.5 Hz, 2H), 7.24 (d,  $J$  = 7.7 Hz, 2H), 3.90 (s, 3H), 3.74 (s, 3H), 3.43 (t,  $J$  = 7.1 Hz, 0.92H, 8% D), 2.69 – 2.62 (m, 1.07H, 93% D), 2.21 – 2.16 (m, 3.71H, 43% D(C(D/H)<sub>3</sub>)).

$^{13}\text{C}$  NMR (126 MHz,  $\text{CDCl}_3$ )  $\delta$  202.59, 202.54, 202.49, 170.0, 167.0, 146.0, 129.9, 128.5, 128.3, 58.5, 52.5, 52.0, 33.3, 33.1, 33.0, 32.8, 29.1, 29.0, 28.9, 28.8, 28.6.

IR (KBr)  $\nu$  2954, 1717, 1612, 1436, 1281, 1179, 1109.

HRMS (ESI)  $m/z$ : Calcd for  $\text{C}_{15}\text{H}_{15}\text{D}_2\text{O}_5$  ( $[\text{M}-\text{H}]^-$ ) 279.1207, found 279.1214.

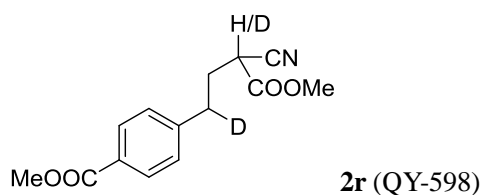

**Methyl 4-(3-cyano-4-methoxy-4-oxobutyl-1,3-*d*2)benzoate**

20 mg, 38% yield. Colorless oil.  $R_f = 0.26$  (petroleum ether/ethyl acetate, 4:1).

$^1\text{H NMR}$  (500 MHz,  $\text{CDCl}_3$ )  $\delta$  7.99 (d,  $J = 7.9$  Hz, 2H), 7.29 (d,  $J = 7.7$  Hz, 2H), 3.91 (s, 3H), 3.80 (s, 3H), 3.47 (t,  $J = 7.1$  Hz, 0.98H, <5% D), 2.94 – 2.84 (m, 1.16H, 84% D), 2.28 (t,  $J = 6.8$  Hz, 2H).

$^{13}\text{C NMR}$  (126 MHz,  $\text{CDCl}_3$ )  $\delta$  166.8, 166.2, 144.3, 130.1, 128.8, 128.6, 116.0, 53.6, 52.1, 36.5, 32.6, 32.5, 32.3, 32.1, 30.9, 30.8.

**IR** (KBr)  $\nu$  2955, 1747, 1716, 1612, 1436, 1279, 1108, 758, 706.

**HRMS** (ESI)  $m/z$ : Calcd for  $\text{C}_{14}\text{H}_{13}\text{DNO}_4$  ( $[\text{M}-\text{H}]^-$ ) 261.0991, found 261.0997.

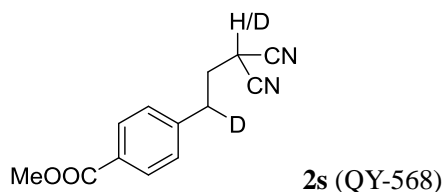

**Methyl 4-(3,3-dicyanopropyl-1,3-*d*2)benzoate**

17 mg, 25% yield. Colorless oil.  $R_f = 0.26$  (petroleum ether/acetone, 4:1).

$^1\text{H NMR}$  (500 MHz,  $\text{CDCl}_3$ )  $\delta$  8.02 (d,  $J = 7.9$  Hz, 2H), 7.29 (d,  $J = 7.9$  Hz, 2H), 3.92 (s, 3H), 3.63 (t,  $J = 7.0$  Hz, 0.95H, 5% D), 3.02 – 2.98 (m, 1.10H, 90% D), 2.38 (t,  $J = 7.2$  Hz, 2H).

$^{13}\text{C NMR}$  (126 MHz,  $\text{CDCl}_3$ )  $\delta$  166.6, 142.5, 130.4, 129.4, 128.5, 112.2, 52.2, 32.2, 32.1, 32.03, 31.96, 31.9, 31.8, 21.7.

**IR** (KBr)  $\nu$  2953, 2919, 1715, 1648, 1613, 1435, 1280, 1108, 757.

**HRMS** (ESI)  $m/z$ : Calcd for  $\text{C}_{13}\text{H}_{10}\text{DN}_2\text{O}_2$  ( $[\text{M}-\text{H}]^-$ ) 228.0889, found 228.0892.

## 5. Gram-scale synthesis.

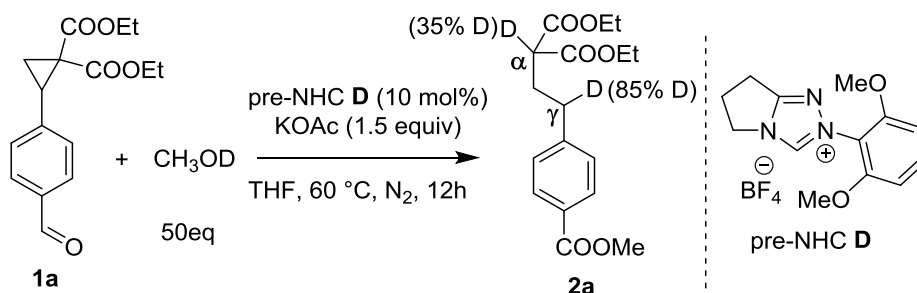

To an oven-dried 250 mL flask equipped with a stir bar was charged with pre-NHC **D** (0.17 g, 0.5 mmol) and  $\text{KOAc}$  (0.77 g, 7.8 mmol). This tube was closed with a septum, evacuated, backfilled with nitrogen three times. To this mixture was added **1a** (1.51 g, 5.2 mmol),  $\text{MeOD}$  (10.4 mL, 260 mmol), freshly distilled dry  $\text{THF}$  (100 mL). The reaction was complete after stirring at  $60^\circ\text{C}$  for 12 h, as indicated by TLC. The reaction mixture was concentrated under reduced pressure, and the residue was purified by column chromatography on silica gel (petroleum ether/ethyl acetate, 5:1) to give the product **2a** (1.03 g, 61% yield,  $\alpha$ : 35%  $\text{D}$ ,  $\gamma$ : 85%  $\text{D}$ ).

## 6. Chemical transformations of **2a**.

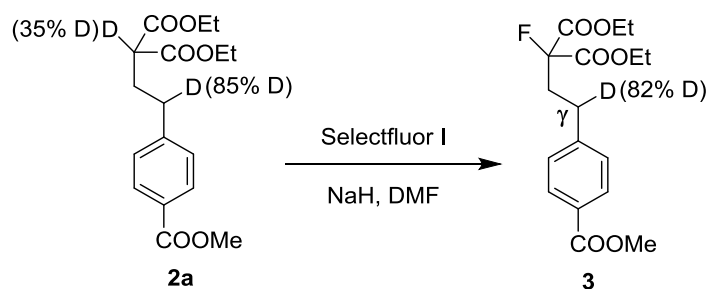

To a 10 mL Schlenk tube was added  $\text{NaH}$  (60% w/w in mineral oil) (14.4 mg, 0.36 mmol), 0.5 mL dry  $\text{DMF}$  and then **2a** (87  $\mu\text{L}$ , 0.3 mmol) under  $\text{N}_2$  atmosphere. The reaction mixture was stirred at room temperature for 1 h, then Selectfluor I (127.5 mg, 0.36 mmol) was added, and 1 mL dry  $\text{DMF}$  was added to rinse the tube. The mixture was stirred at room temperature overnight, then diluted with water (15 mL), and extracted with  $\text{EtOAc}$  for three times ( $3 \times 10$  mL). The combined organic extracts were washed with water, then with brine, dried over anhydrous  $\text{MgSO}_4$  and concentrated under reduced pressure. The residual was purified by flash column chromatography on silica gel (petroleum ether/ethyl acetate, 5:1) to give the product **3** colorless oil (92 mg, 90% yield,  $\gamma$ : 82%  $\text{D}$ ).

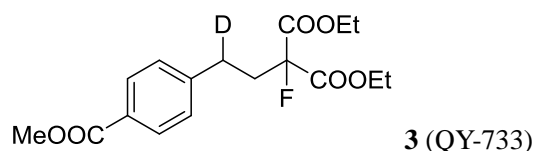

**Diethyl 2-fluoro-2-(2-(4-(methoxycarbonyl)phenyl)ethyl-2-*d*)malonate**

92 mg, 90% yield. Colorless oil.  $R_f = 0.35$  (petroleum ether/ethyl acetate, 5:1).

$^1\text{H NMR}$  (400 MHz,  $\text{CDCl}_3$ )  $\delta$  7.97 (d,  $J = 8.2$  Hz, 2H), 7.27 (d,  $J = 8.2$  Hz, 2H), 4.28 (q,  $J = 7.1$  Hz, 4H), 3.90 (s, 3H), 2.81 – 2.75 (m, 1.18H, 82% D), 2.53 – 2.44 (m, 2H), 2.48 – 2.42 (m, 1H), 1.31 (t,  $J = 7.1$  Hz, 6H).

$^{13}\text{C NMR}$  (101 MHz,  $\text{CDCl}_3$ )  $\delta$  166.9, 166.1, 165.8, 145.5, 129.9, 128.49, 128.43, 94.2 (d,  $^1J_{\text{CF}} = 199.4$  Hz), 62.7, 52.0, 35.5 (d,  $^2J_{\text{CF}} = 21.2$  Hz), 14.0.

$^{19}\text{F NMR}$  (376 MHz,  $\text{CDCl}_3$ )  $\delta$  -167.4 (s)

**IR** (KBr)  $\nu$  2982, 1749, 1720, 1279, 1195, 1097, 1063, 1020.

**HRMS** (ESI)  $m/z$ : Calcd for  $\text{C}_{17}\text{H}_{21}\text{FNaO}_6$  ( $[\text{M}+\text{Na}]^+$ ) 364.1283, found 364.1293.

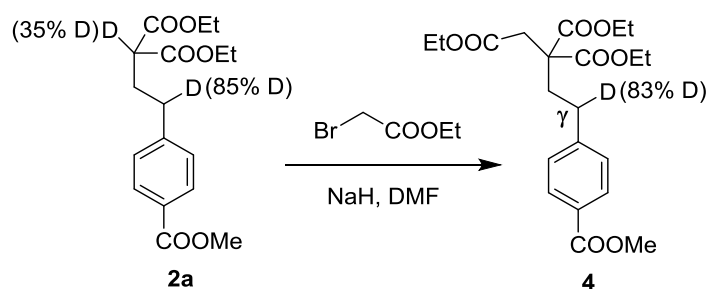

To a 10 mL Schlenk tube was added NaH (60% w/w in mineral oil) (9.6 mg, 0.24 mmol), 0.5 mL dry DMF and then **2a** (58  $\mu\text{L}$ , 0.2 mmol) under  $\text{N}_2$  atmosphere. The reaction mixture was stirred at room temperature for 1 h, then ethyl 2-bromoacetate (27  $\mu\text{L}$ , 0.24 mmol) was added, and 1 mL dry DMF was added to rinse the tube. The mixture was stirred at room temperature overnight, then diluted with water (15 mL), and extracted with EtOAc for three times ( $3 \times 10$  mL). The combined organic extracts were washed with water, then with brine, dried over anhydrous  $\text{MgSO}_4$  and concentrated under reduced pressure. The residual was purified by flash column chromatography on silica gel (petroleum ether/ethyl acetate, 5:1) to give the product **4** colorless oil (73 mg, 89% yield,  $\gamma$ : 83% D).

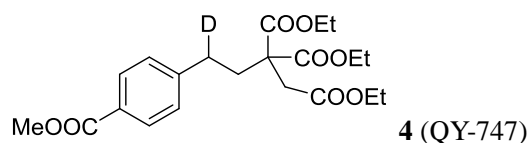

**Triethyl 4-(4-(methoxycarbonyl)phenyl)butane-1,2,2-tricarboxylate-4-*d***

73 mg, 89% yield. Colorless oil.  $R_f = 0.31$  (petroleum ether/acetone, 5:1).

$^1\text{H NMR}$  (400 MHz,  $\text{CDCl}_3$ )  $\delta$  7.95 (d,  $J = 8.2$  Hz, 2H), 7.24 (d,  $J = 8.1$  Hz, 2H), 4.22 (q,  $J = 7.1$  Hz, 4H), 4.13 (q,  $J = 7.1$  Hz, 1H), 3.90 (s, 3H), 3.04 (s, 2H), 2.66 – 2.58 (m, 1.16H, 84% D), 2.33 – 2.28 (m, 2H), 1.30 – 1.23 (m, 9H).

$^{13}\text{C NMR}$  (101 MHz,  $\text{CDCl}_3$ )  $\delta$  170.17, 170.14, 167.0, 146.5, 129.8, 128.4, 128.2, 61.7, 60.8, 55.5, 52.0, 37.8, 34.6, 31.0, 30.9, 30.7, 30.5, 14.1, 14.0.

**IR** (KBr)  $\nu$  2982, 1725, 1612, 1438, 1370, 1280, 1181, 1106, 760.

**HRMS** (ESI)  $m/z$ : Calcd for  $\text{C}_{21}\text{H}_{27}\text{DNaO}_8$  ( $[\text{M}+\text{Na}]^+$ ) 432.1739, found 432.1752.

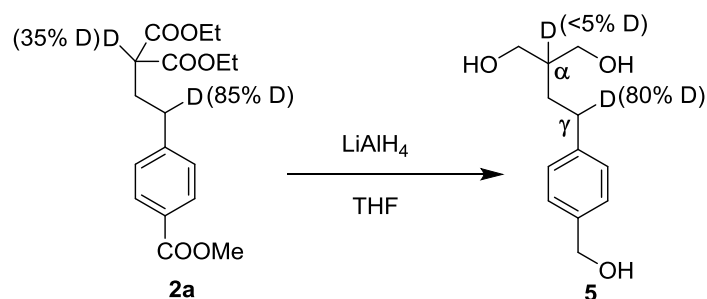

To a solution of **2a** (58  $\mu\text{L}$ , 0.2 mmol) in dry THF (0.1 M) was added  $\text{LiAlH}_4$  (0.6 mL, 1 M solution in THF) dropwise under  $\text{N}_2$  atmosphere at 0  $^\circ\text{C}$ . Then, the reaction mixture was stirred at room temperature for 5 h. TLC showed that the reduction reaction was complete. The reaction mixture was quenched with water, and the 0.5 M HCl was added to adjust the pH to 5~7. The solvents were evaporated under reduced pressure, then diluted with EtOAc, dried over anhydrous  $\text{Na}_2\text{SO}_4$ , filtered, and concentrated under reduced pressure. The residue was purified by column chromatography (dichloromethane/methanol, 15:1 – 10:1) to give **5** as white solid (35 mg, 83% yield,  $\gamma$ : 80% D).

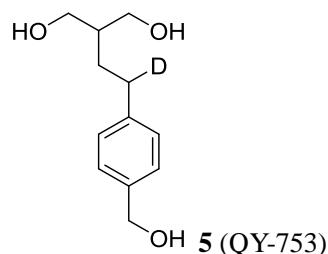**2-(2-(4-(hydroxymethyl)phenyl)ethyl-2-*d*)propane-1,3-diol**

35 mg, 83% yield. White solid, m.p. 67-68  $^\circ\text{C}$ .  $R_f = 0.11$  (dichloromethane/methanol, 20:1).



**<sup>1</sup>H NMR** (400 MHz, Acetone-*d*<sub>6</sub>) δ 7.25 (d, *J* = 8.0 Hz, 2H), 7.17 (d, *J* = 8.0 Hz, 2H), 4.58 (d, *J* = 3.5 Hz, 2H), 4.24 – 4.21 (m, 1H), 3.78 (br, 2H), 3.63 (br, 4H), 2.68 – 2.62 (m, 1.20H, 80% D), 1.68 – 1.60 (m, 3H).

**<sup>13</sup>C NMR** (101 MHz, Acetone-*d*<sub>6</sub>) δ 141.4, 139.7, 128.1, 126.7, 63.7, 63.4, 63.3, 42.6, 32.9, 32.7, 32.5, 32.3.

**IR** (KBr) ν 3356, 2920, 2852, 1657, 1632, 1468, 1420, 1033.

**HRMS** (APCI) *m/z*: Calcd for C<sub>12</sub>H<sub>17</sub>DNaO<sub>3</sub> ([M+Na]<sup>+</sup>) 234.1211, found 234.1222.

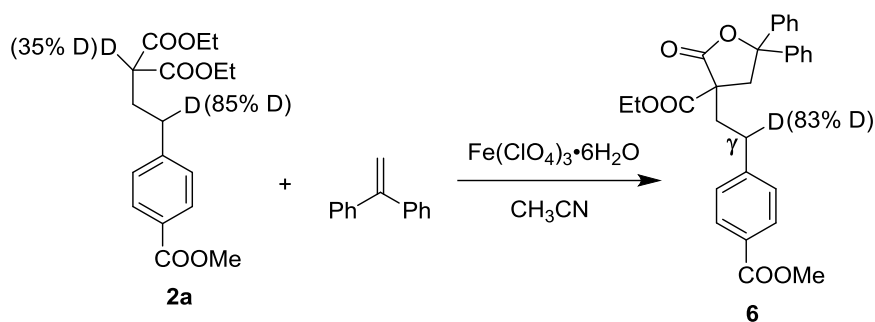

To a 10 mL Schlenk tube was added Fe(ClO<sub>4</sub>)<sub>3</sub>·6H<sub>2</sub>O (192.0 mg, 0.4 mmol), **2a** (58 μL, 0.2 mmol) and ethene-1,1-diyldibenzene (192.0 mg, 0.22 mmol), 3mL dry CH<sub>3</sub>CN under N<sub>2</sub> atmosphere. The reaction mixture was stirred at room temperature for 6 h. The solvent was evaporated under reduced pressure, the residual was then diluted with water, and extracted with DCM for three times. The combined organic extracts were dried over anhydrous MgSO<sub>4</sub> and concentrated under reduced pressure. The residual was purified by flash column chromatography on silica gel (petroleum ether/ethyl acetate, 5:1) to give the product **6** colorless oil (72 mg, 76% yield, γ: 83% D).

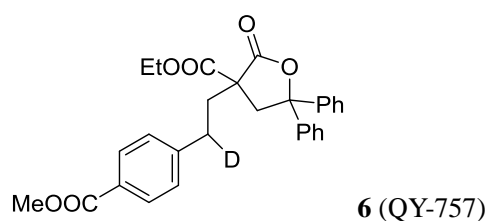

### 2-(2-(4-(hydroxymethyl)phenyl)ethyl-2-*d*)propane-1,3-diol

72 mg, 76% yield. Colorless wax. R<sub>f</sub> = 0.26 (petroleum ether/acetone, 5:1).

**<sup>1</sup>H NMR** (400 MHz, CDCl<sub>3</sub>) δ 7.91 (d, *J* = 8.2 Hz, 2H), 7.48 – 7.46 (m, 2H), 7.42 – 7.40 (m, 2H), 7.36 – 7.31 (m, 4H), 7.28 – 7.25 (m, 2H), 7.16 (d, *J* = 8.1 Hz, 2H), 3.91 – 3.83 (m, 4H), 3.77 – 3.68 (m, 2H), 2.91 – 2.85 (m, 1.59H, 41% D), 2.64 – 2.57 (m, 0.60H, 40% D), 2.24 – 2.17 (m, 1H), 2.10 – 2.04 (m, 1H), 1.00 (t, *J* = 7.1 Hz, 3H).

**<sup>13</sup>C NMR** (101 MHz, CDCl<sub>3</sub>) δ 173.2, 169.5, 167.0, 146.0, 143.9, 142.3, 129.8, 128.7, 128.46, 128.41, 128.3, 128.0, 127.9, 125.6, 124.9, 87.2, 62.2, 55.5, 52.0, 45.0, 36.5, 36.4, 31.0, 30.8, 30.6, 30.4, 13.6.

**IR** (KBr) ν 2954, 1781, 1718, 1612, 1450, 1281, 1110, 1022 974, 757, 702.

**HRMS** (APCI)  $m/z$ : Calcd for  $C_{29}H_{27}DNaO_6$  ( $[M+Na]^+$ ) 496.1846, found 496.1856.

## 7. References

- 1 N. Kawabata and M. Tanimoto, *Tetrahedron*, 1980, **36**, 3517.
- 2 T. Chidley, I. Jameel, S. Rizwan, P. A. Peixoto, L. Pouysegou, S. Quideau, W. S. Hopkins and G. K. Murphy, *Angew. Chem. Int. Ed.*, 2019, **58**, 16959.
- 3 P. Qian, B. Du, R. Song, X. Wu, H. Mei, J. Han and Y. Pan, *J. Org. Chem.*, 2016, **81**, 6546.
- 4 K. Usami, Y. Nagasawa, E. Yamaguchi, N. Tada and A. Itoh, *Org. Lett.*, 2016, **18**, 8.
- 5 S. Lin, M. Li, Z. Dong, F. Liang and J. Zhang, *Org. Biomol. Chem.*, 2014, **12**, 1341.

9.978  
7.804  
7.788  
7.385  
7.368  
4.307  
4.292  
4.285  
4.271  
4.260  
4.257  
4.246  
4.231  
4.224  
4.210  
3.901  
3.887  
3.880  
3.865  
3.850  
3.836  
3.829  
3.822  
3.814  
3.274  
3.257  
3.240  
2.228  
2.217  
2.212  
2.201  
1.789  
1.778  
1.770  
1.760  
1.320  
1.306  
1.291  
0.901  
0.886  
0.872

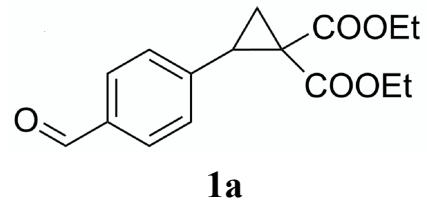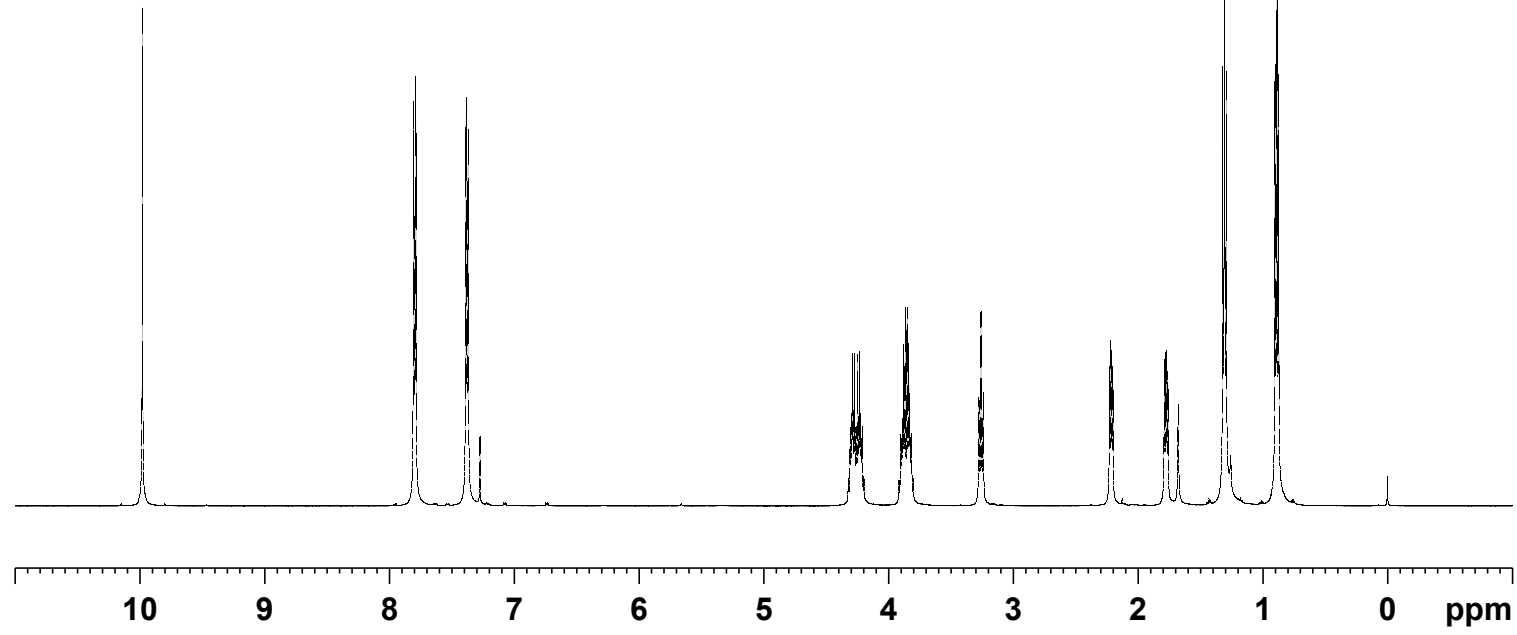

1.00  
2.00  
2.00  
2.06  
2.04  
1.01  
1.05  
1.02  
3.47  
3.27

Current Data Parameters  
 NAME 500M-2022  
 EXPNO 97  
 PROCNO 1

F2 - Acquisition Parameters  
 Date\_ 20220608  
 Time 20.22  
 INSTRUM spect  
 PROBHD 5 mm CPPBBO BB  
 PULPROG zg30  
 TD 65536  
 SOLVENT CDCl3  
 NS 16  
 DS 2  
 SWH 10000.000 Hz  
 FIDRES 0.152588 Hz  
 AQ 3.2767999 sec  
 RG 31.72  
 DW 50.000 usec  
 DE 6.50 usec  
 TE 298.2 K  
 D1 1.00000000 sec  
 D11 0 sec  
 TD0 1

==== CHANNEL f1 =====  
 SFO1 500.1330885 MHz  
 NUC1 1H  
 P1 11.25 usec  
 PLW1 20.00000000 W

==== CHANNEL f2 =====  
 SFO2 500.1330885 MHz  
 NUC2 off  
 CPDPRG[2]  
 PCPD2 0 usec  
 PLW2 0 W  
 PLW12 0 W  
 PLW13 0 W

F2 - Processing parameters  
 SI 65536  
 SF 500.1300060 MHz  
 WDW EM  
 SSB 0  
 LB 0.30 Hz  
 GB 0  
 PC 1.00

— 191.76  
 — 169.39  
 — 166.27  
 — 142.04  
 — 135.46  
 — 129.52  
 — 129.20

— 61.97  
 — 61.38

— 37.91  
 — 31.76

— 18.91  
 — 14.08  
 — 13.74

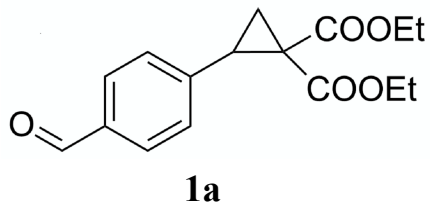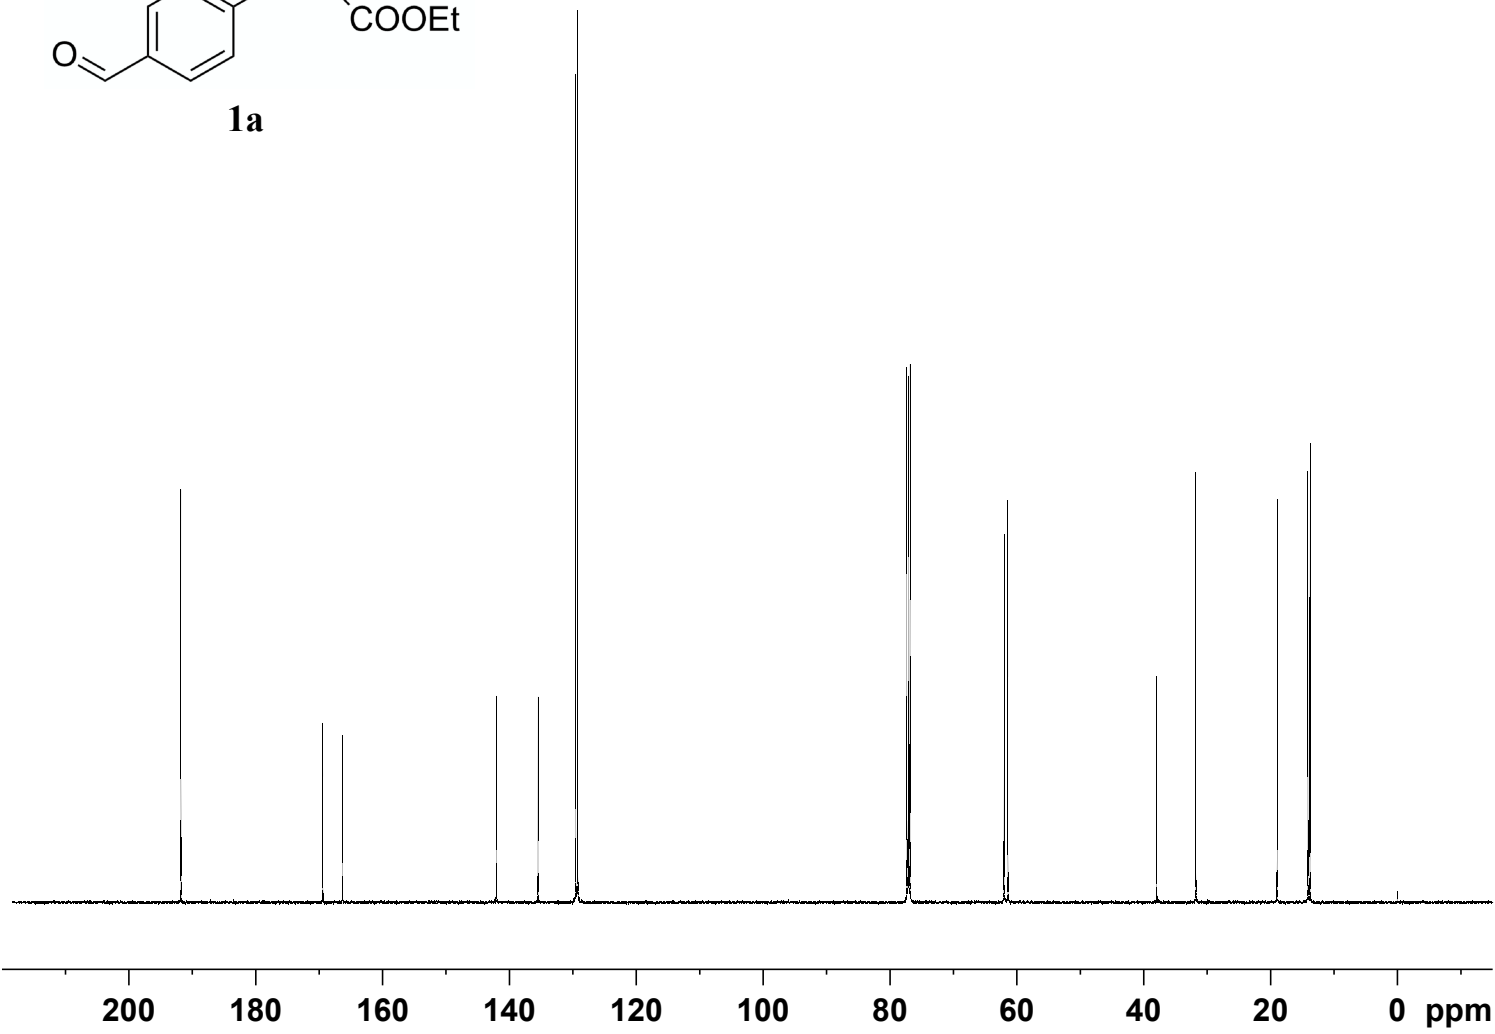

Current Data Parameters  
 NAME 500M-2020xia  
 EXPNO 134  
 PROCNO 1

F2 - Acquisition Parameters  
 Date\_ 20211102  
 Time 9.24  
 INSTRUM spect  
 PROBHD 5 mm CPPBBO BB  
 PULPROG zgpg30  
 TD 65536  
 SOLVENT CDCl3  
 NS 512  
 DS 4  
 SWH 29761.904 Hz  
 FIDRES 0.454131 Hz  
 AQ 1.1010048 sec  
 RG 192.89  
 DW 16.800 usec  
 DE 18.00 usec  
 TE 298.2 K  
 D1 2.00000000 sec  
 D11 0.03000000 sec  
 TD0 1

==== CHANNEL f1 =====  
 SFO1 125.7703637 MHz  
 NUC1 13C  
 P1 9.80 usec  
 PLW1 57.00000000 W

==== CHANNEL f2 =====  
 SFO2 500.1320005 MHz  
 NUC2 1H  
 CPDPRG[2] waltz16  
 PCPD2 80.00 usec  
 PLW2 20.00000000 W  
 PLW12 0.35778001 W  
 PLW13 0.22898000 W

F2 - Processing parameters  
 SI 32768  
 SF 125.7577869 MHz  
 WDW EM  
 SSB 0  
 LB 1.00 Hz  
 GB 0  
 PC 1.40

9.952  
7.668  
7.638  
7.622  
7.227  
7.211  
4.342  
4.327  
4.320  
4.313  
4.306  
4.299  
4.292  
4.276  
4.268  
4.262  
4.254  
4.247  
4.240  
3.817  
3.803  
3.789  
3.775  
3.202  
3.185  
3.168  
2.455  
2.328  
2.317  
2.312  
2.301  
1.765  
1.755  
1.747  
1.737  
1.329  
1.314  
1.300  
0.842  
0.828  
0.814

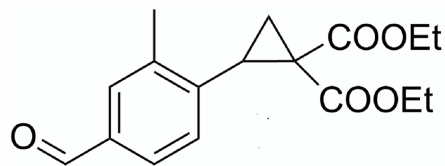

**1b**

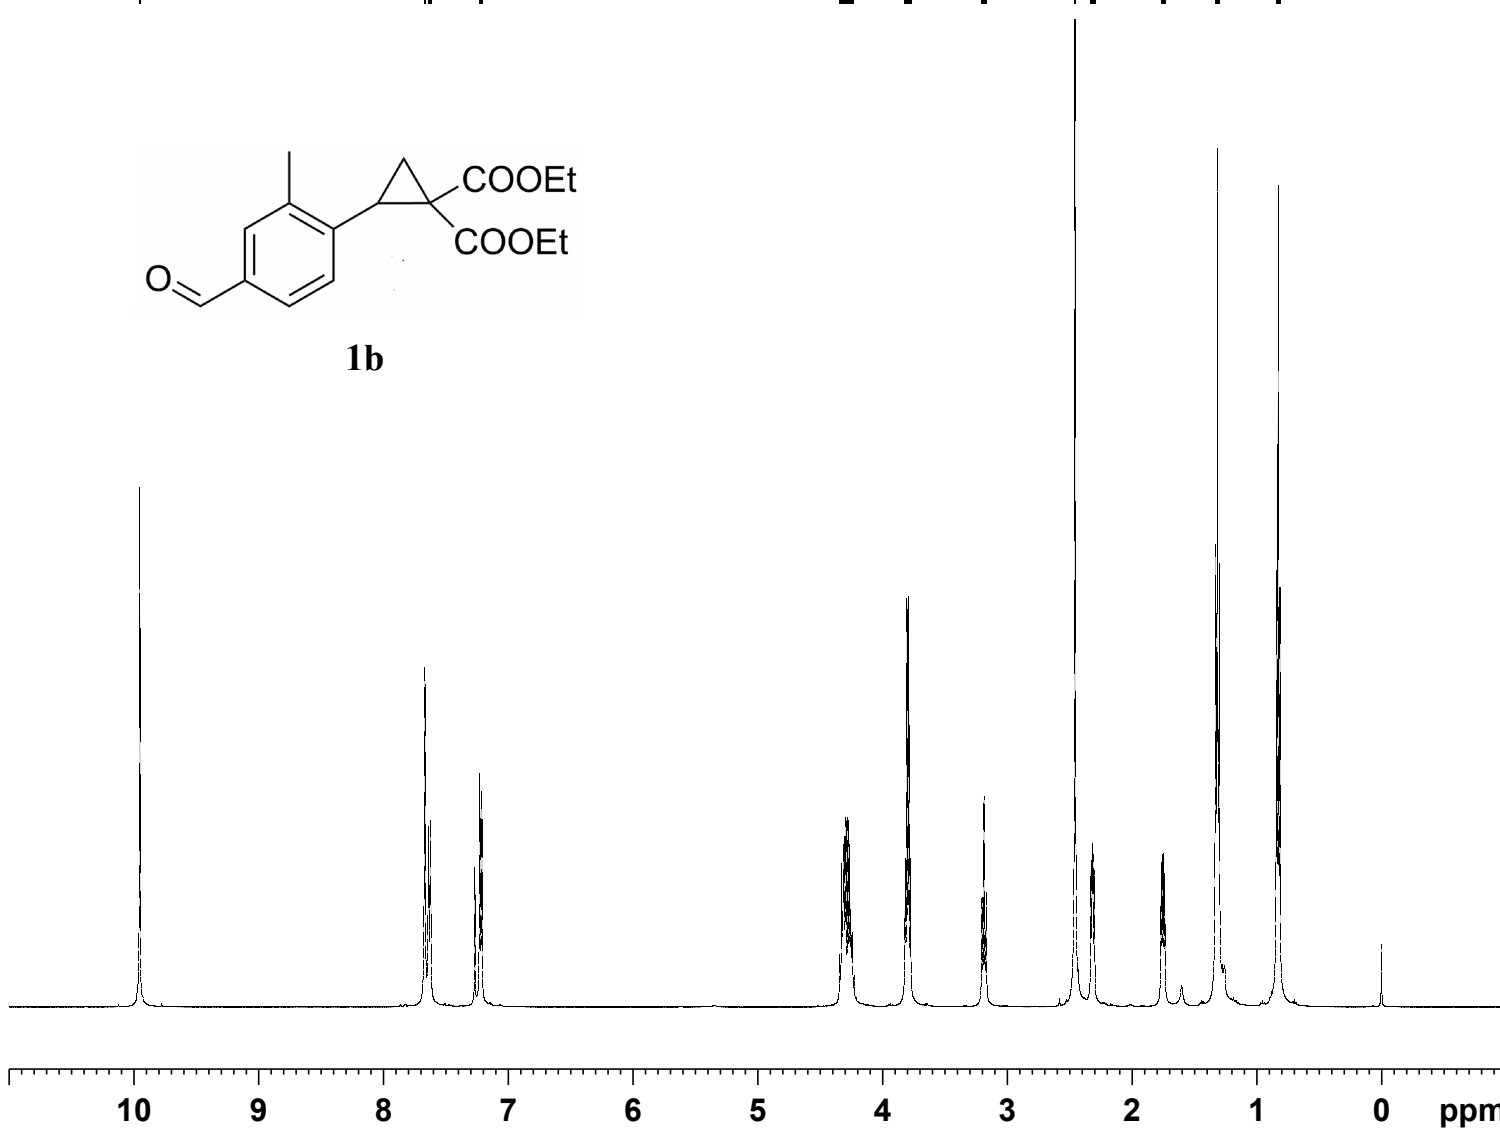

1.00  
0.95  
0.96  
0.96  
2.46  
2.03  
0.99  
3.06  
1.12  
1.02  
3.68  
3.14

Current Data Parameters  
 NAME 500M-2022  
 EXPNO 17  
 PROCNO 1

F2 - Acquisition Parameters  
 Date\_ 20220226  
 Time 6.19  
 INSTRUM spect  
 PROBHD 5 mm CPPBBO BB  
 PULPROG zg30  
 TD 65536  
 SOLVENT CDCl3  
 NS 16  
 DS 2  
 SWH 10000.000 Hz  
 FIDRES 0.152588 Hz  
 AQ 3.2767999 sec  
 RG 55.37  
 DW 50.000 usec  
 DE 6.50 usec  
 TE 298.2 K  
 D1 1.00000000 sec  
 D11 0 sec  
 TD0 1

==== CHANNEL f1 =====  
 SFO1 500.1330885 MHz  
 NUC1 1H  
 P1 11.25 usec  
 PLW1 20.00000000 W

==== CHANNEL f2 =====  
 SFO2 500.1330885 MHz  
 NUC2 off  
 CPDPRG[2]  
 PCPD2 0 usec  
 PLW2 0 W  
 PLW12 0 W  
 PLW13 0 W

F2 - Processing parameters  
 SI 65536  
 SF 500.1300092 MHz  
 WDW EM  
 SSB 0  
 LB 0.30 Hz  
 GB 0  
 PC 1.00

— 192.10  
 — 169.50  
 — 166.31  
 — 140.29  
 — 140.26  
 — 135.55  
 — 130.26  
 — 128.09  
 — 127.49

— 61.91  
 — 61.27

— 36.67  
 — 30.75  
 — 19.46  
 — 18.33  
 — 14.12  
 — 13.64

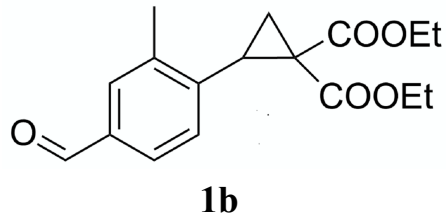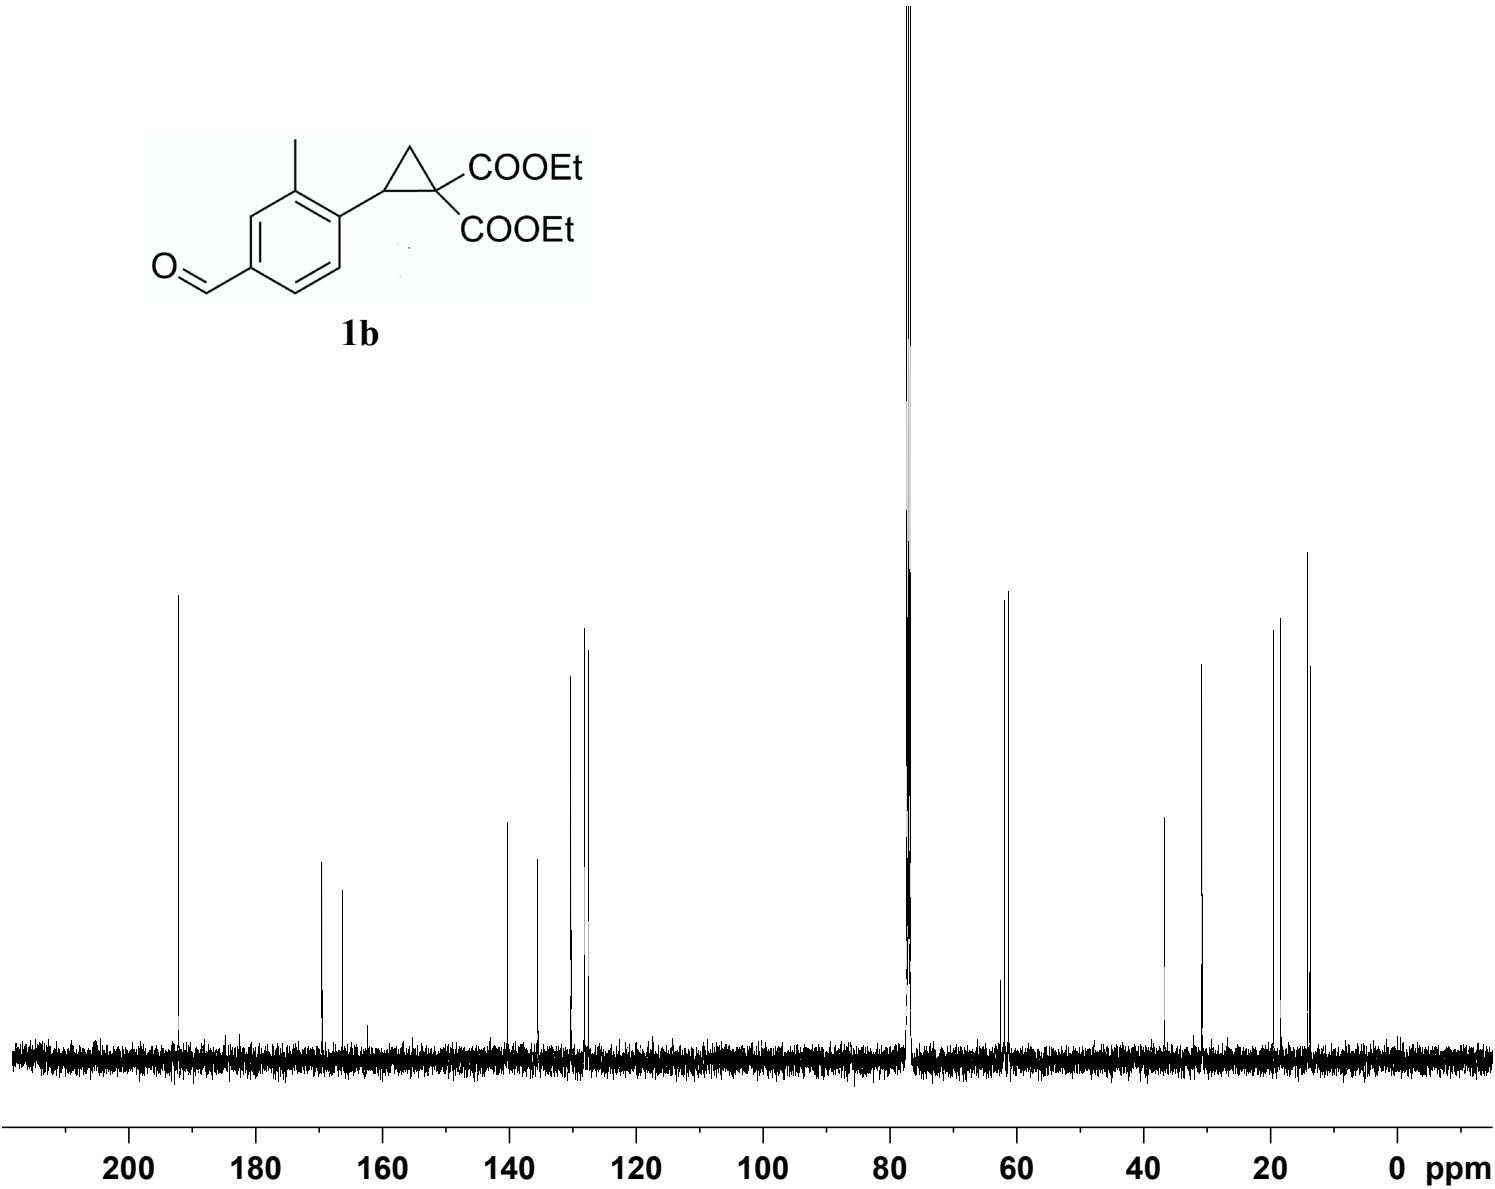

Current Data Parameters  
 NAME 500M-2022  
 EXPNO 18  
 PROCNO 1

F2 - Acquisition Parameters  
 Date\_ 20220226  
 Time 6.22  
 INSTRUM spect  
 PROBHD 5 mm CPPBBO BB  
 PULPROG zgpg30  
 TD 65536  
 SOLVENT CDCl3  
 NS 50  
 DS 4  
 SWH 29761.904 Hz  
 FIDRES 0.454131 Hz  
 AQ 1.1010048 sec  
 RG 192.89  
 DW 16.800 usec  
 DE 18.00 usec  
 TE 298.2 K  
 D1 2.00000000 sec  
 D11 0.03000000 sec  
 TD0 1

==== CHANNEL f1 =====  
 SFO1 125.7703637 MHz  
 NUC1 13C  
 P1 10.50 usec  
 PLW1 57.00000000 W

==== CHANNEL f2 =====  
 SFO2 500.1320005 MHz  
 NUC2 1H  
 CPDPRG[2] waltz16  
 PCPD2 80.00 usec  
 PLW2 20.00000000 W  
 PLW12 0.39550999 W  
 PLW13 0.25312999 W

F2 - Processing parameters  
 SI 32768  
 SF 125.7577885 MHz  
 WDW EM  
 SSB 0  
 LB 1.00 Hz  
 GB 0  
 PC 1.40

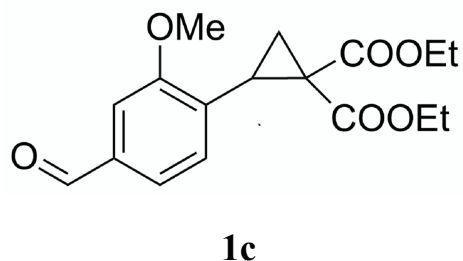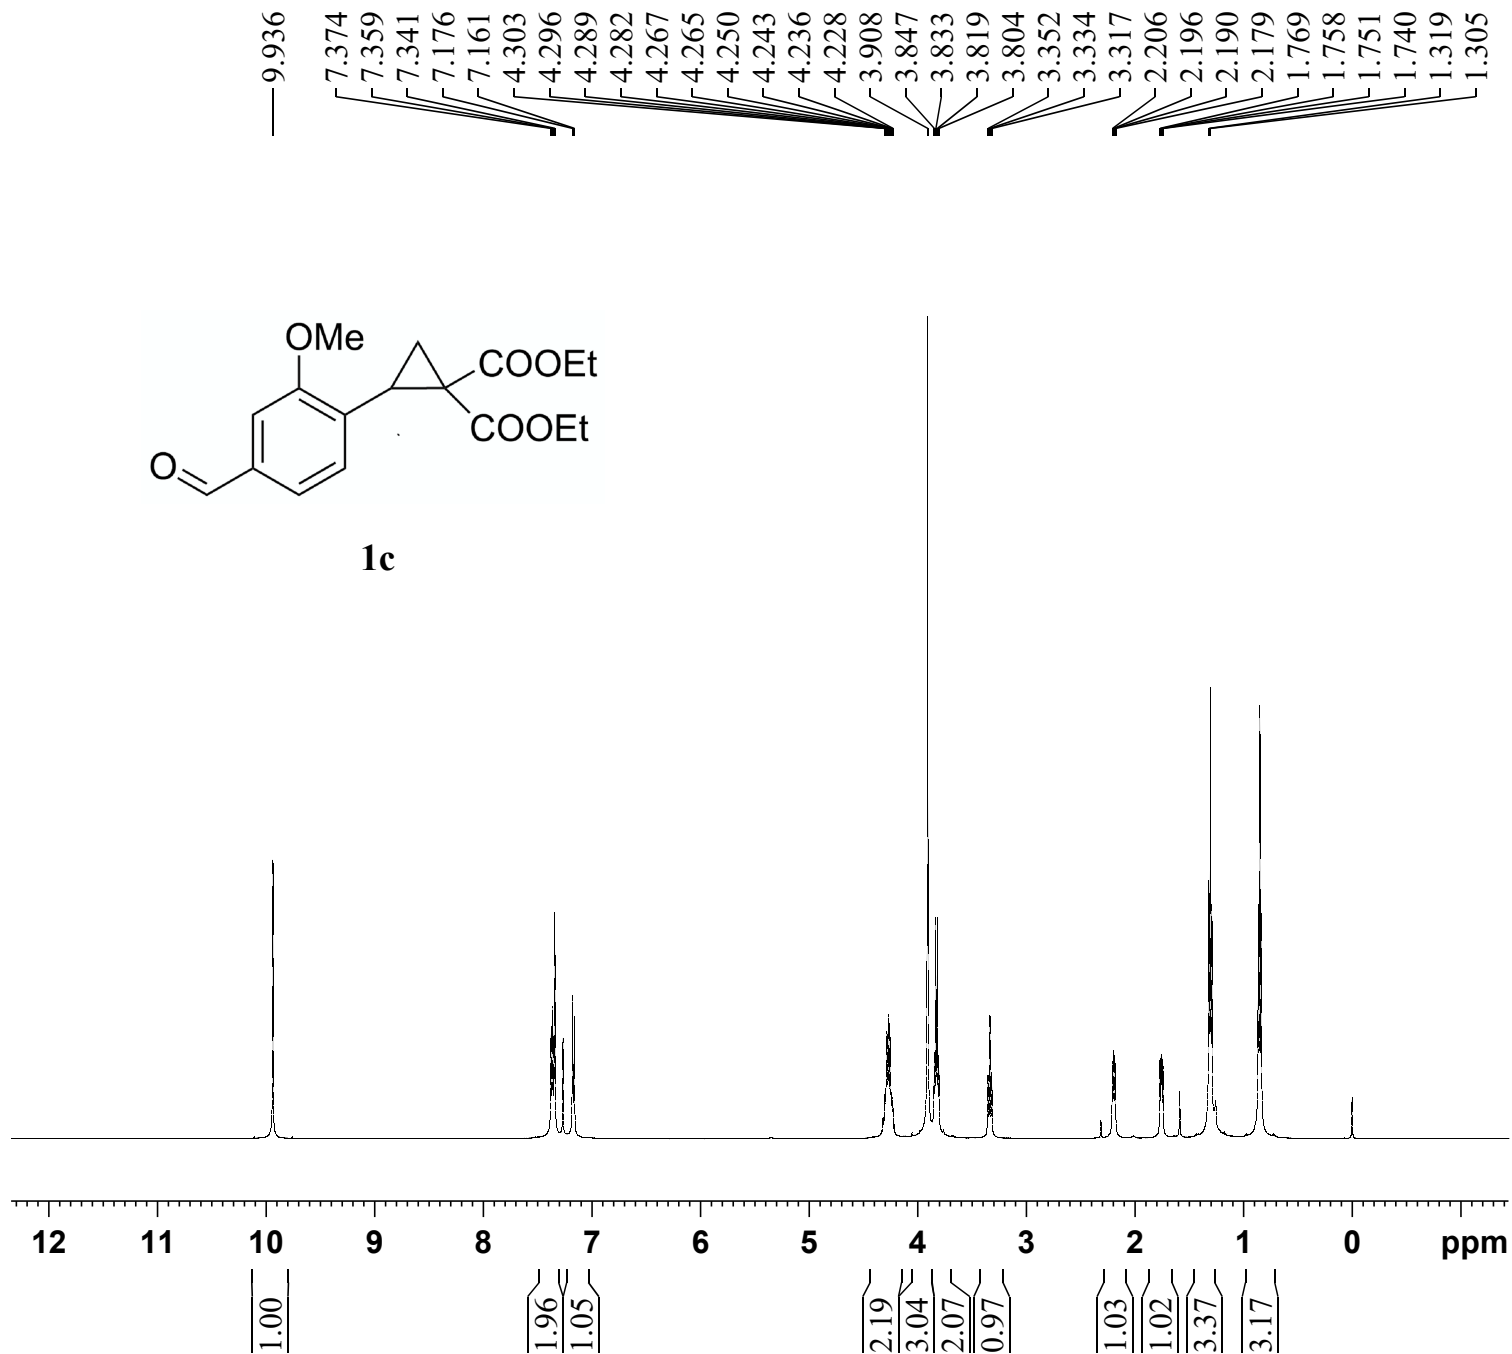

Current Data Parameters  
 NAME 500M-2020xia  
 EXPNO 243  
 PROCNO 1

F2 - Acquisition Parameters  
 Date\_ 20220208  
 Time 23.27  
 INSTRUM spect  
 PROBHD 5 mm CPPBBO BB  
 PULPROG zg30  
 TD 65536  
 SOLVENT CDCl3  
 NS 16  
 DS 2  
 SWH 10000.000 Hz  
 FIDRES 0.152588 Hz  
 AQ 3.2767999 sec  
 RG 31.72  
 DW 50.000 usec  
 DE 6.50 usec  
 TE 298.2 K  
 D1 1.00000000 sec  
 D11 0 sec  
 TD0 1

==== CHANNEL f1 =====  
 SFO1 500.1330885 MHz  
 NUC1 1H  
 P1 11.25 usec  
 PLW1 20.00000000 W

==== CHANNEL f2 =====  
 SFO2 500.1330885 MHz  
 NUC2 off  
 CPDPRG[2]  
 PCPD2 0 usec  
 PLW2 0 W  
 PLW12 0 W  
 PLW13 0 W

F2 - Processing parameters  
 SI 65536  
 SF 500.1300096 MHz  
 WDW EM  
 SSB 0  
 LB 0.30 Hz  
 GB 0  
 PC 1.00

— 191.83  
 \ 169.62  
 \ 166.64  
 — 159.77  
 \ 136.82  
 \ 131.17  
 \ 128.43  
 \ 123.87  
 — 107.95

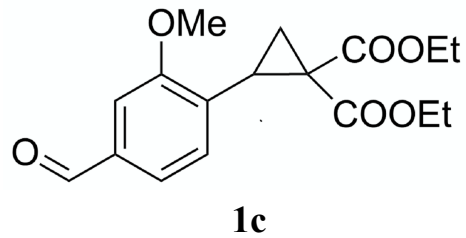

\ 61.70  
 \ 61.08  
 \ 55.84  
 — 36.80  
 — 27.85  
 \ 18.42  
 \ 14.11  
 \ 13.75

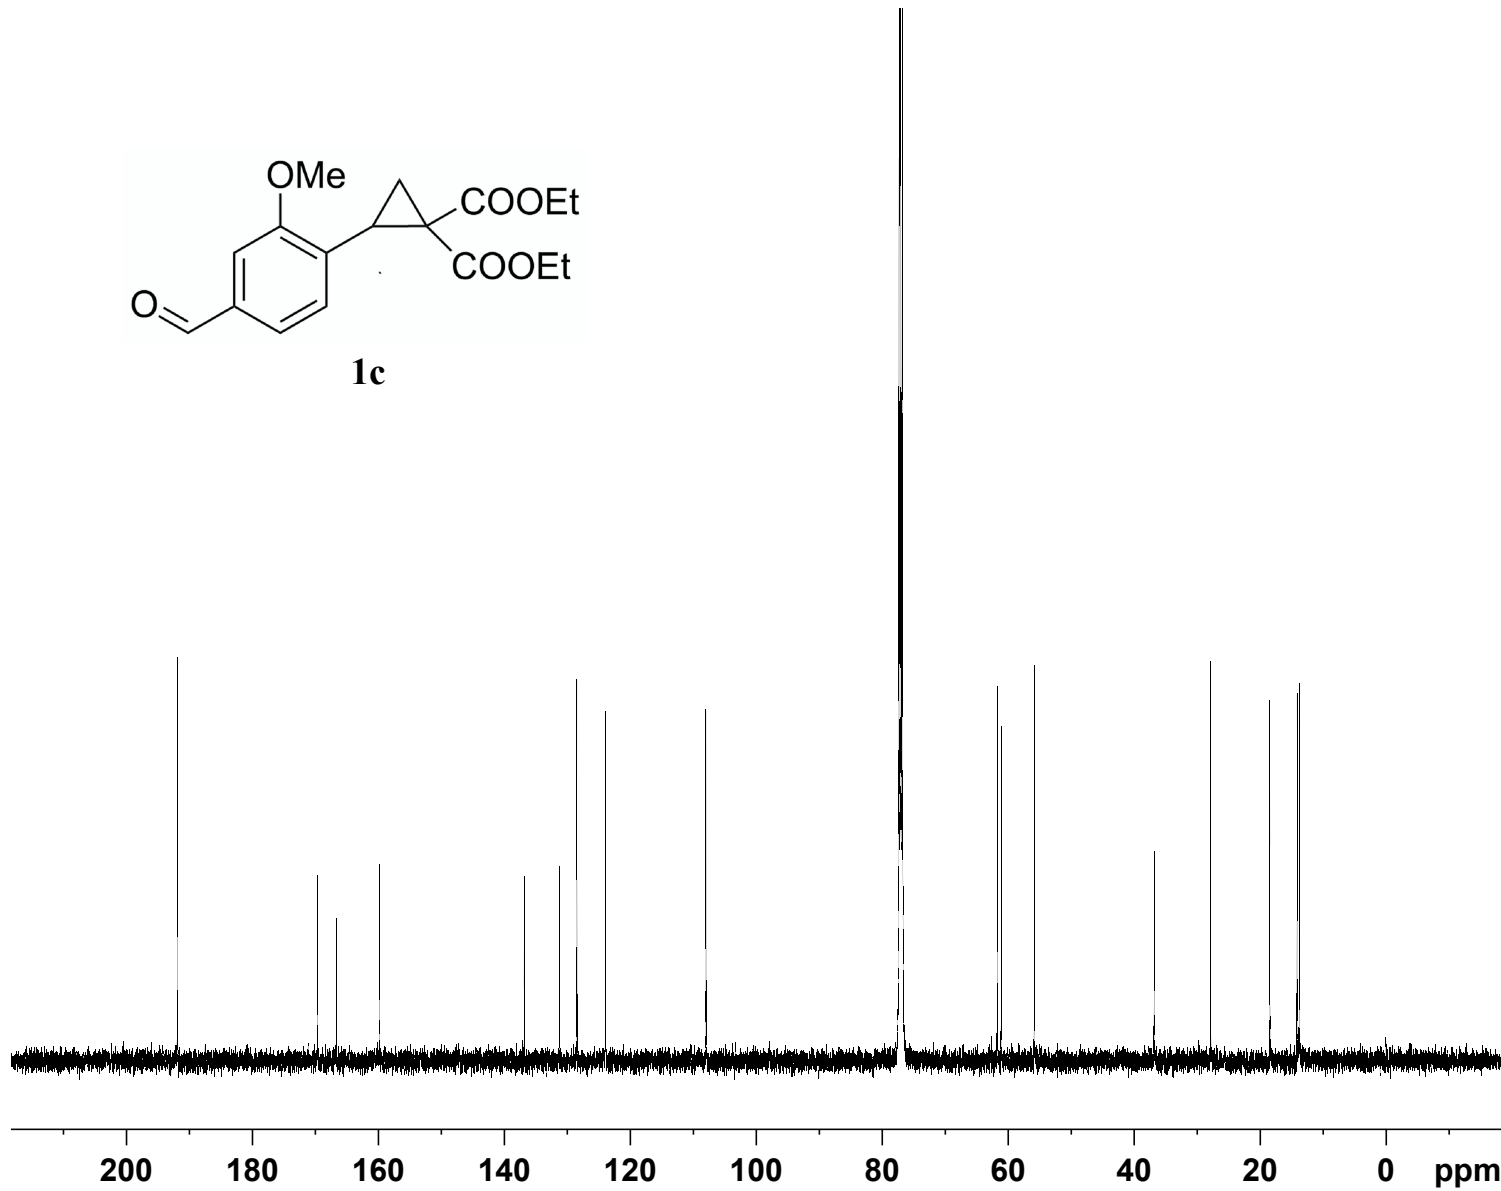

Current Data Parameters  
 NAME 500M-2020xia  
 EXPNO 244  
 PROCNO 1

F2 - Acquisition Parameters  
 Date\_ 20220208  
 Time 23.55  
 INSTRUM spect  
 PROBHD 5 mm CPPBBO BB  
 PULPROG zgpg30  
 TD 65536  
 SOLVENT CDCl3  
 NS 512  
 DS 4  
 SWH 29761.904 Hz  
 FIDRES 0.454131 Hz  
 AQ 1.1010048 sec  
 RG 192.89  
 DW 16.800 usec  
 DE 18.00 usec  
 TE 298.2 K  
 D1 2.00000000 sec  
 D11 0.03000000 sec  
 TD0 1

==== CHANNEL f1 =====  
 SFO1 125.7703637 MHz  
 NUC1 13C  
 P1 10.50 usec  
 PLW1 57.00000000 W

==== CHANNEL f2 =====  
 SFO2 500.1320005 MHz  
 NUC2 1H  
 CPDPRG[2] waltz16  
 PCPD2 80.00 usec  
 PLW2 20.00000000 W  
 PLW12 0.39550999 W  
 PLW13 0.25312999 W

F2 - Processing parameters  
 SI 32768  
 SF 125.7577885 MHz  
 WDW EM  
 SSB 0  
 LB 1.00 Hz  
 GB 0  
 PC 1.40



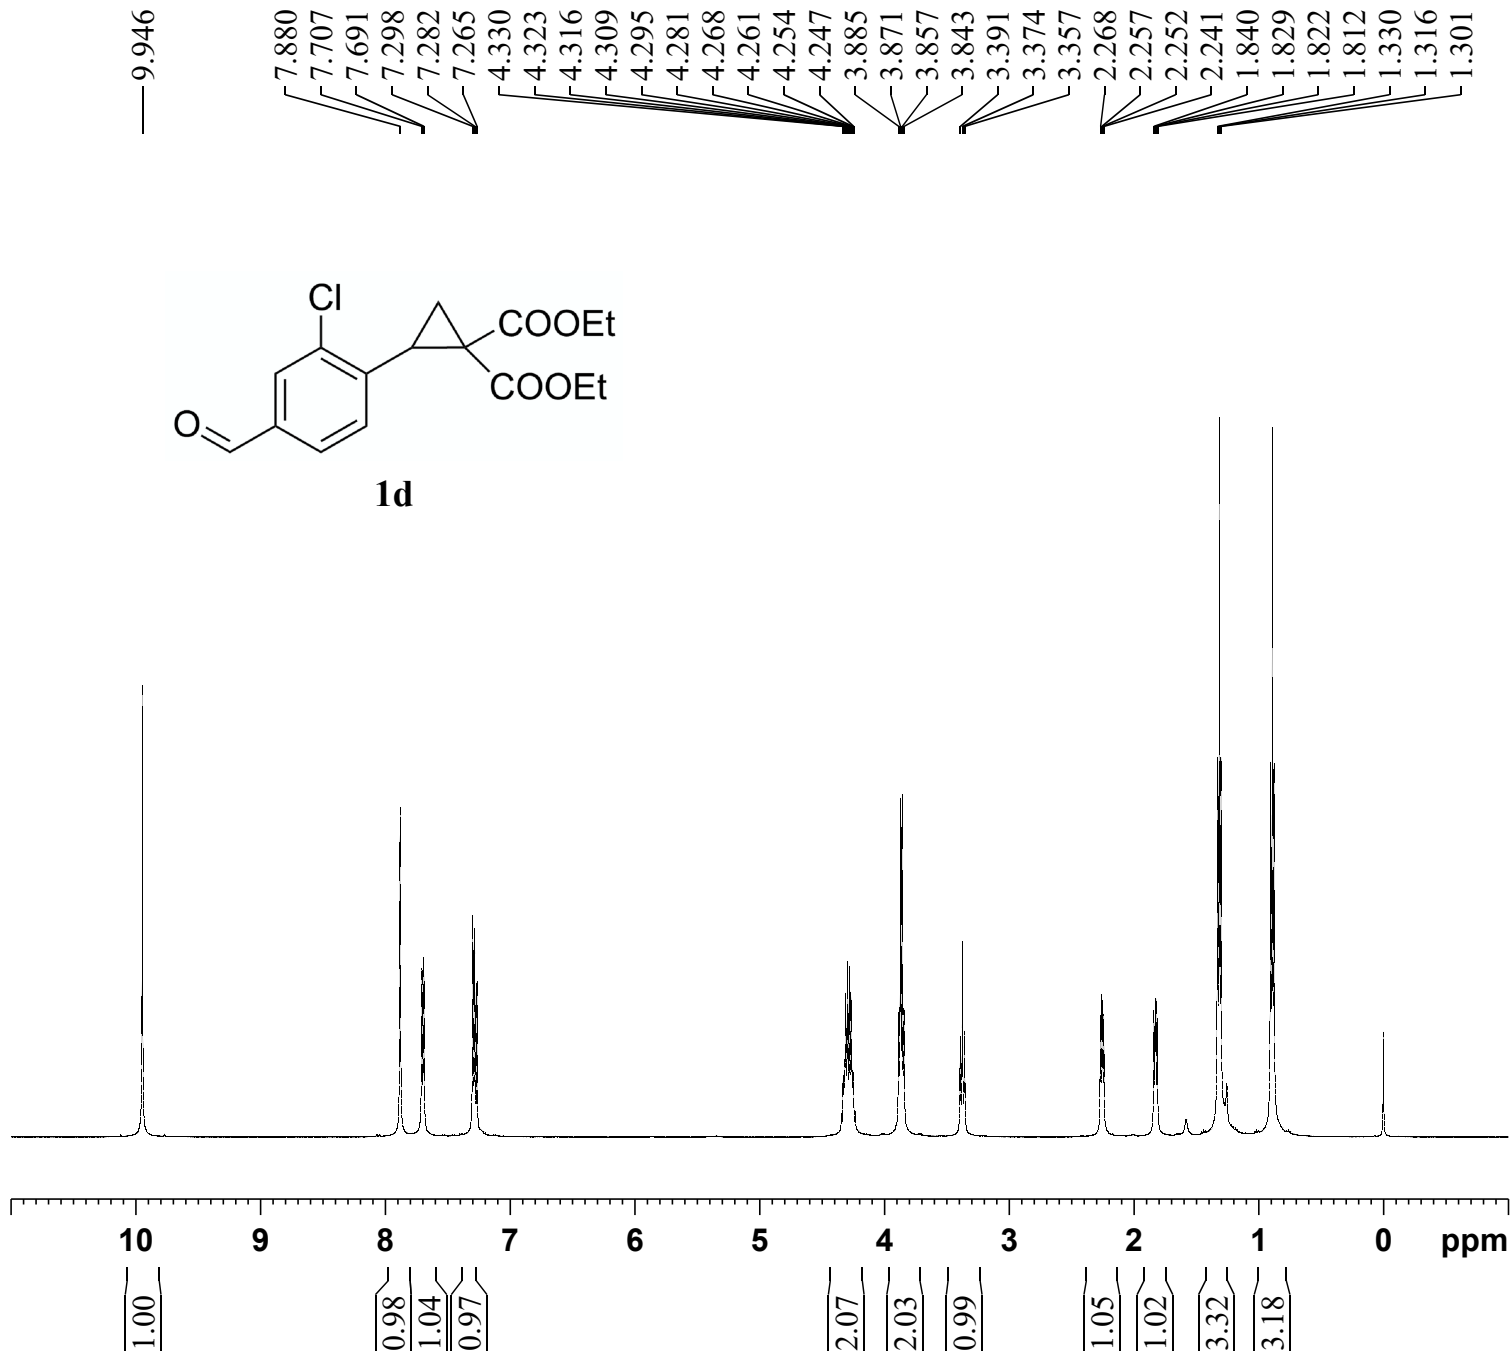

Current Data Parameters  
 NAME 500M-2020xia  
 EXPNO 236  
 PROCNO 1

F2 - Acquisition Parameters  
 Date\_ 20220207  
 Time 21.59  
 INSTRUM spect  
 PROBHD 5 mm CPPBBO BB  
 PULPROG zg30  
 TD 65536  
 SOLVENT CDCl3  
 NS 16  
 DS 2  
 SWH 10000.000 Hz  
 FIDRES 0.152588 Hz  
 AQ 3.2767999 sec  
 RG 31.72  
 DW 50.000 usec  
 DE 6.50 usec  
 TE 298.2 K  
 D1 1.00000000 sec  
 D11 0 sec  
 TD0 1

==== CHANNEL f1 =====  
 SFO1 500.1330885 MHz  
 NUC1 1H  
 P1 11.25 usec  
 PLW1 20.00000000 W

==== CHANNEL f2 =====  
 SFO2 500.1330885 MHz  
 NUC2 off  
 CPDPRG[2]  
 PCPD2 0 usec  
 PLW2 0 W  
 PLW12 0 W  
 PLW13 0 W

F2 - Processing parameters  
 SI 65536  
 SF 500.1300100 MHz  
 WDW EM  
 SSB 0  
 LB 0.30 Hz  
 GB 0  
 PC 1.00

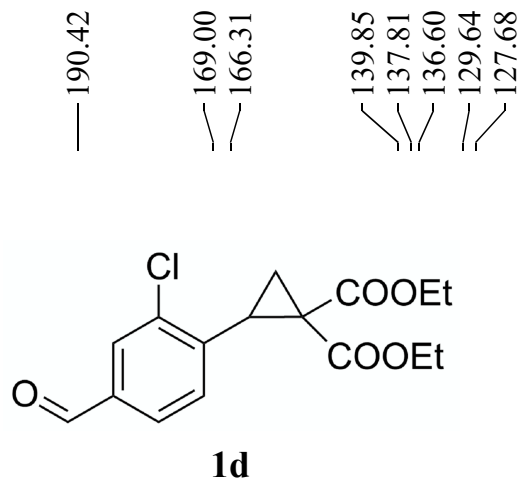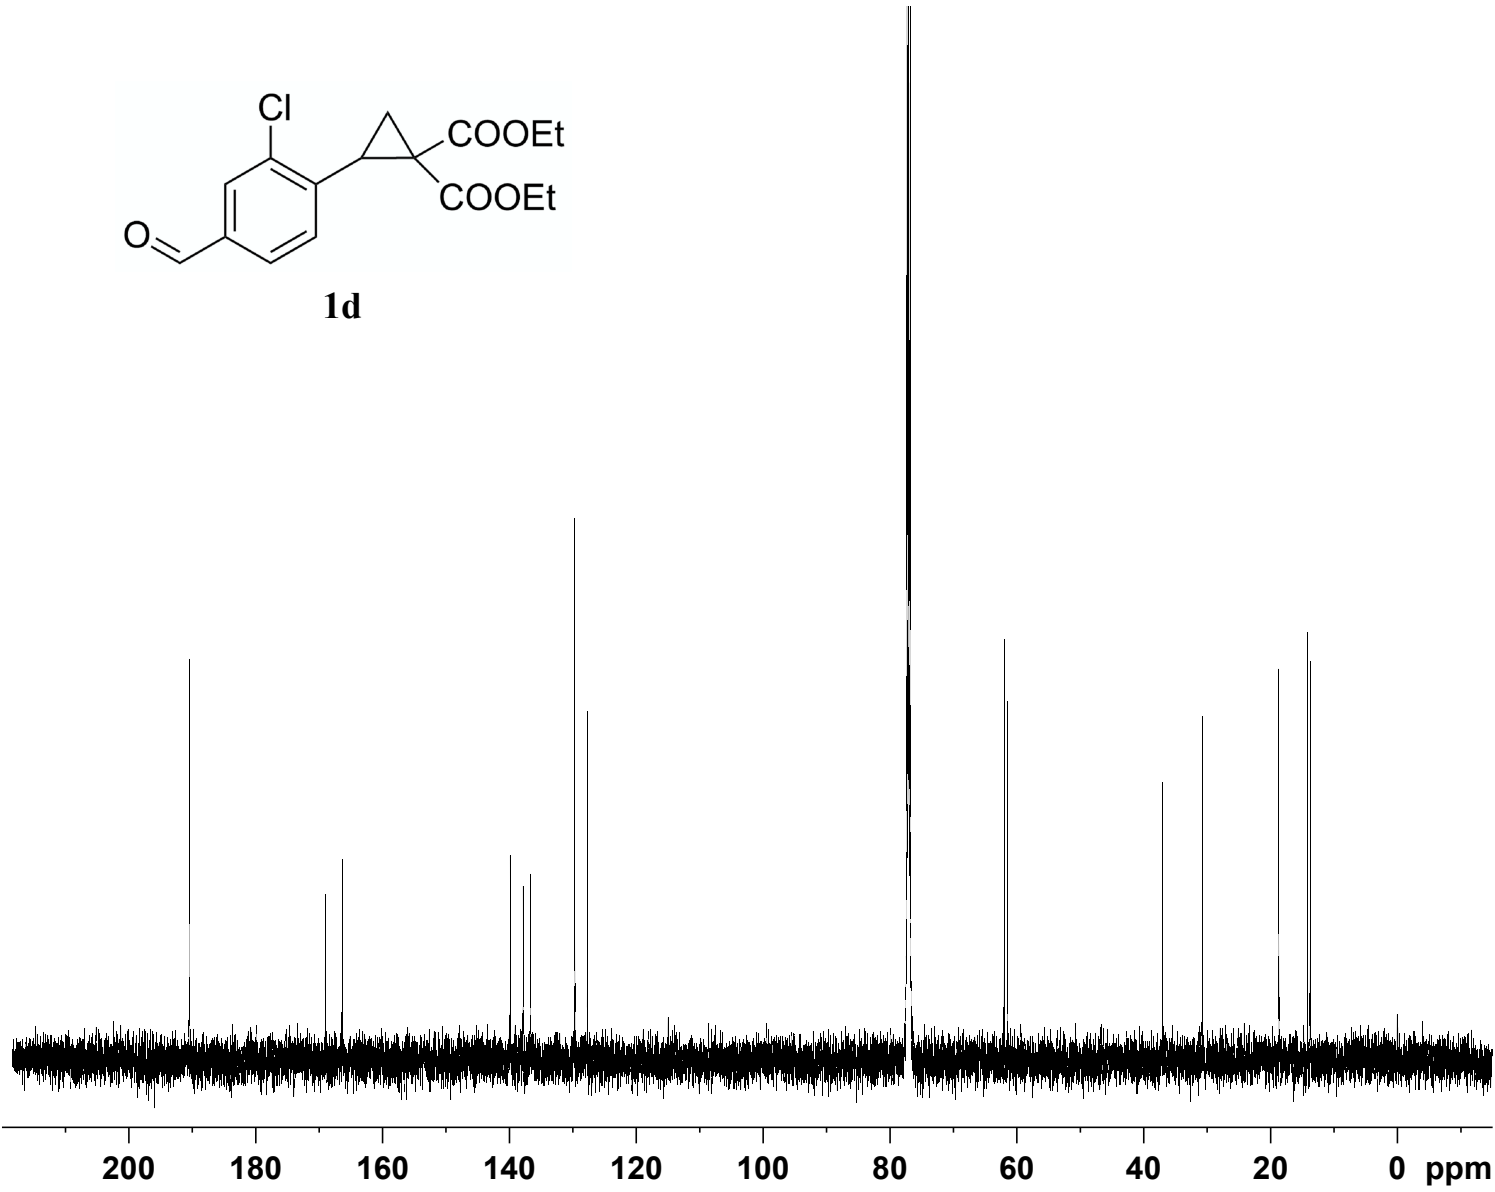

$\text{---} 61.94$   
 $\text{---} 61.41$   
 $\text{---} 36.92$   
 $\text{---} 30.71$   
 $\text{---} 18.62$   
 $\text{---} 14.11$   
 $\text{---} 13.69$

Current Data Parameters  
 NAME 500M-2020xia  
 EXPNO 237  
 PROCNO 1

F2 - Acquisition Parameters  
 Date\_ 20220207  
 Time 22.04  
 INSTRUM spect  
 PROBHD 5 mm CPPBBO BB  
 PULPROG zgpg30  
 TD 65536  
 SOLVENT CDCl3  
 NS 100  
 DS 4  
 SWH 29761.904 Hz  
 FIDRES 0.454131 Hz  
 AQ 1.1010048 sec  
 RG 192.89  
 DW 16.800 usec  
 DE 18.00 usec  
 TE 298.2 K  
 D1 2.00000000 sec  
 D11 0.03000000 sec  
 TD0 1

==== CHANNEL f1 =====  
 SFO1 125.7703637 MHz  
 NUC1 13C  
 P1 10.50 usec  
 PLW1 57.00000000 W

==== CHANNEL f2 =====  
 SFO2 500.1320005 MHz  
 NUC2 1H  
 CPDPRG[2] waltz16  
 PCPD2 80.00 usec  
 PLW2 20.00000000 W  
 PLW12 0.39550999 W  
 PLW13 0.25312999 W

F2 - Processing parameters  
 SI 32768  
 SF 125.7577885 MHz  
 WDW EM  
 SSB 0  
 LB 1.00 Hz  
 GB 0  
 PC 1.40

10.033  
8.164  
7.979  
7.963  
7.389  
7.373  
4.318  
4.311  
4.304  
4.297  
4.283  
4.269  
4.255  
4.248  
4.241  
4.234  
3.884  
3.876  
3.869  
3.862  
3.846  
3.832  
3.824  
3.817  
3.499  
3.482  
3.465  
2.345  
2.333  
2.330  
2.318  
1.888  
1.877  
1.870  
1.859  
1.321  
1.307  
1.292  
0.872  
0.858  
0.844

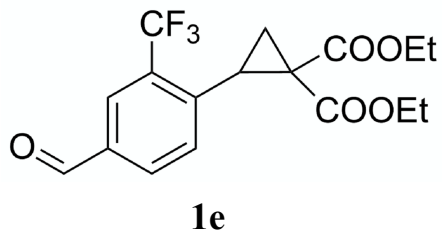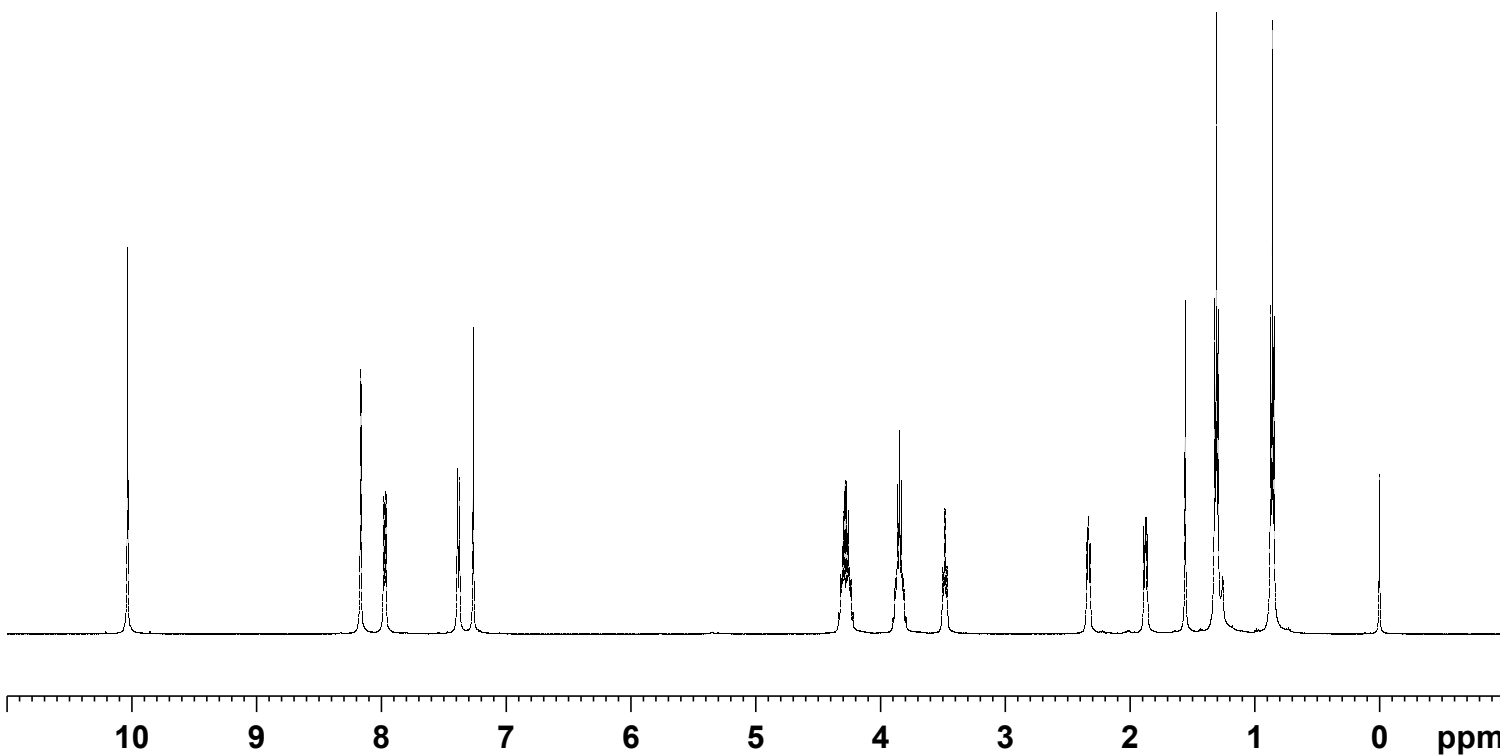

0.99  
1.00  
1.01  
1.01  
2.11  
2.03  
1.00  
1.03  
1.03  
3.31  
3.26

Current Data Parameters  
NAME 500M-2022  
EXPNO 55  
PROCNO 1

F2 - Acquisition Parameters  
Date\_ 20220321  
Time 4.35  
INSTRUM spect  
PROBHD 5 mm CPPBBO BB  
PULPROG zg30  
TD 65536  
SOLVENT CDCl3  
NS 16  
DS 2  
SWH 10000.000 Hz  
FIDRES 0.152588 Hz  
AQ 3.2767999 sec  
RG 62.06  
DW 50.000 usec  
DE 6.50 usec  
TE 298.2 K  
D1 1.00000000 sec  
D11 0 sec  
TD0 1

==== CHANNEL f1 =====  
SFO1 500.1330885 MHz  
NUC1 1H  
P1 11.25 usec  
PLW1 20.00000000 W

==== CHANNEL f2 =====  
SFO2 500.1330885 MHz  
NUC2 off  
CPDPRG[2]  
PCPD2 0 usec  
PLW2 0 W  
PLW12 0 W  
PLW13 0 W

F2 - Processing parameters  
SI 65536  
SF 500.1300112 MHz  
WDW EM  
SSB 0  
LB 0.30 Hz  
GB 0  
PC 1.00

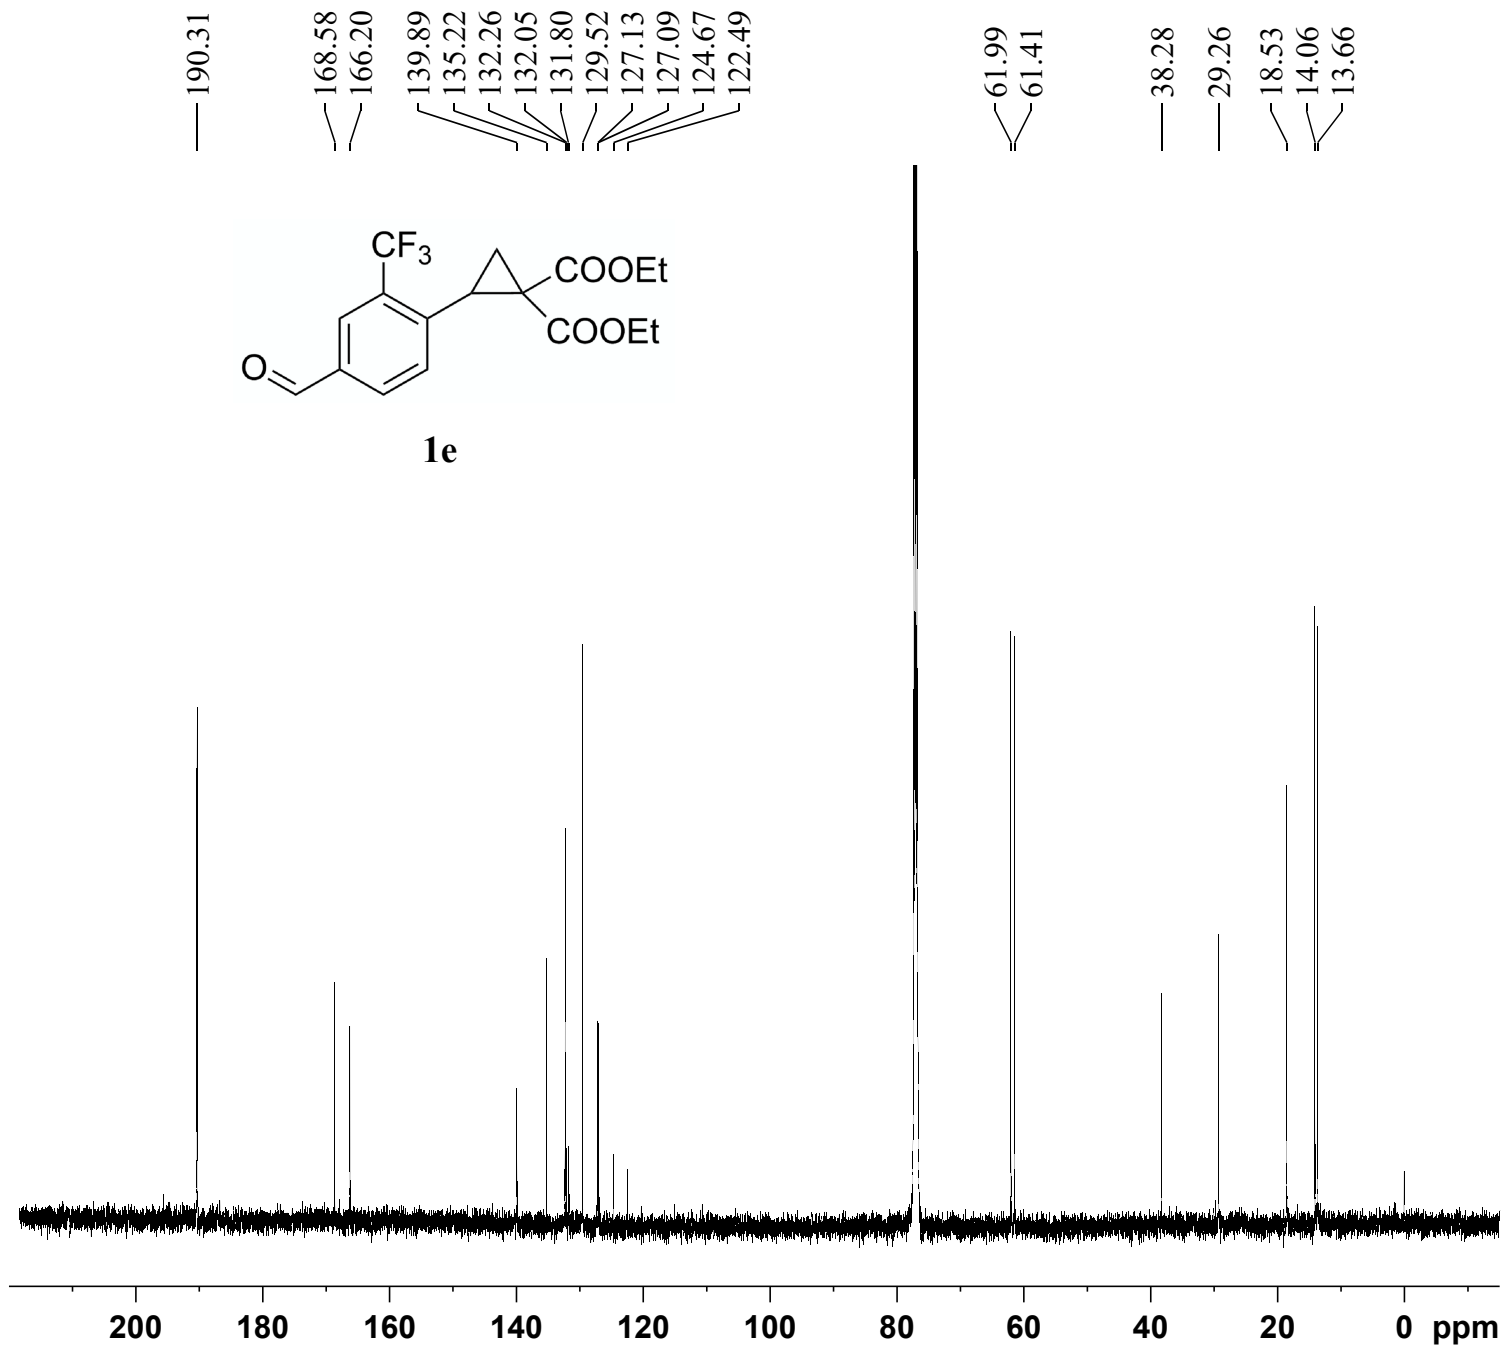

Current Data Parameters  
 NAME 500M-2022  
 EXPNO 56  
 PROCNO 1

F2 - Acquisition Parameters  
 Date\_ 20220321  
 Time 5.30  
 INSTRUM spect  
 PROBHD 5 mm CPPBBO BB  
 PULPROG zgpg30  
 TD 65536  
 SOLVENT CDCl3  
 NS 1024  
 DS 4  
 SWH 29761.904 Hz  
 FIDRES 0.454131 Hz  
 AQ 1.1010048 sec  
 RG 192.89  
 DW 16.800 usec  
 DE 18.00 usec  
 TE 298.2 K  
 D1 2.00000000 sec  
 D11 0.03000000 sec  
 TD0 1

==== CHANNEL f1 =====  
 SFO1 125.7703637 MHz  
 NUC1 13C  
 P1 10.50 usec  
 PLW1 57.00000000 W

==== CHANNEL f2 =====  
 SFO2 500.1320005 MHz  
 NUC2 1H  
 CPDPRG[2] waltz16  
 PCPD2 80.00 usec  
 PLW2 20.00000000 W  
 PLW12 0.39550999 W  
 PLW13 0.25312999 W

F2 - Processing parameters  
 SI 32768  
 SF 125.7577885 MHz  
 WDW EM  
 SSB 0  
 LB 1.00 Hz  
 GB 0  
 PC 1.40

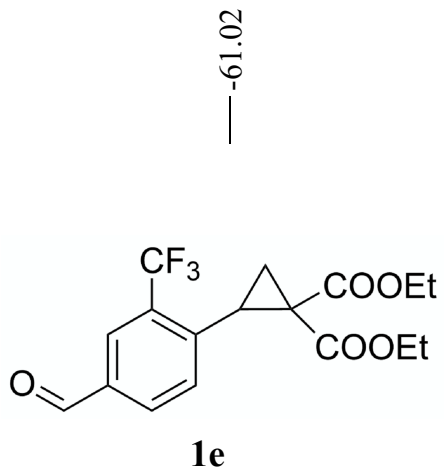

Current Data Parameters  
 NAME 400M-2023-F  
 EXPNO 8  
 PROCNO 1

F2 - Acquisition Parameters  
 Date\_ 20230506  
 Time 19.09  
 INSTRUM spect  
 PROBHD 5 mm PABBO BB/  
 PULPROG zgfhigqn.2  
 TD 131072  
 SOLVENT CDCl3  
 NS 16  
 DS 4  
 SWH 89285.711 Hz  
 FIDRES 0.681196 Hz  
 AQ 0.7340032 sec  
 RG 206.33  
 DW 5.600 usec  
 DE 6.50 usec  
 TE 298.0 K  
 D1 1.00000000 sec  
 D11 0.03000000 sec  
 TD0 1

==== CHANNEL f1 =====  
 SFO1 376.5642094 MHz  
 NUC1 19F  
 P1 14.50 usec  
 PLW1 17.98900032 W

==== CHANNEL f2 =====  
 SFO2 400.2416010 MHz  
 NUC2 1H  
 CPDPRG[2] waltz16  
 PCPD2 90.00 usec  
 PLW2 12.00000000 W  
 PLW12 0.30294999 W  
 PLW13 0.24539000 W

F2 - Processing parameters  
 SI 65536  
 SF 376.6018696 MHz  
 WDW EM  
 SSB 0  
 LB 0.30 Hz  
 GB 0  
 PC 1.00

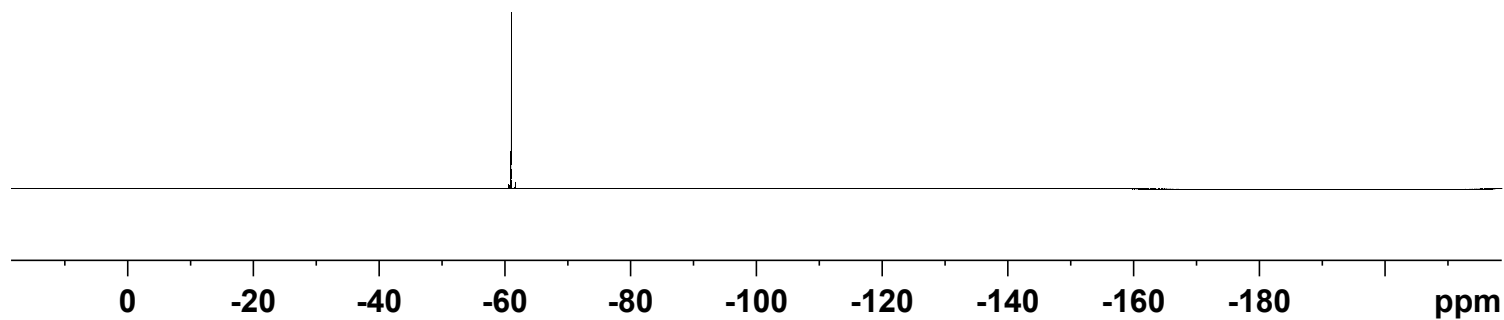

10.017  
7.792  
7.778  
7.466  
7.451  
7.435  
7.422  
7.406  
7.396  
7.382  
7.228  
7.212  
4.198  
4.184  
4.177  
4.162  
4.147  
4.133  
4.126  
4.112  
3.942  
3.928  
3.913  
3.899  
3.047  
3.030  
3.013  
2.237  
2.226  
2.220  
2.209  
1.732  
1.721  
1.714  
1.702  
1.235  
1.221  
1.207  
0.914  
0.900  
0.885

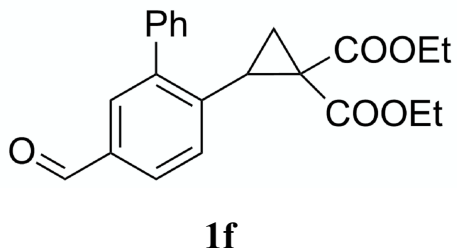

Current Data Parameters  
NAME 500M-2022  
EXPNO 50  
PROCNO 1

F2 - Acquisition Parameters  
Date\_ 20220315  
Time 10.29  
INSTRUM spect  
PROBHD 5 mm CPPBBO BB  
PULPROG zg30  
TD 65536  
SOLVENT CDCl3  
NS 16  
DS 2  
SWH 10000.000 Hz  
FIDRES 0.152588 Hz  
AQ 3.2767999 sec  
RG 31.72  
DW 50.000 usec  
DE 6.50 usec  
TE 298.2 K  
D1 1.00000000 sec  
D11 0 sec  
TD0 1

==== CHANNEL f1 =====  
SFO1 500.1330885 MHz  
NUC1 1H  
P1 11.25 usec  
PLW1 20.00000000 W

==== CHANNEL f2 =====  
SFO2 500.1330885 MHz  
NUC2 off  
CPDPRG[2]  
PCPD2 0 usec  
PLW2 0 W  
PLW12 0 W  
PLW13 0 W

F2 - Processing parameters  
SI 65536  
SF 500.1300099 MHz  
WDW EM  
SSB 0  
LB 0.30 Hz  
GB 0  
PC 1.00

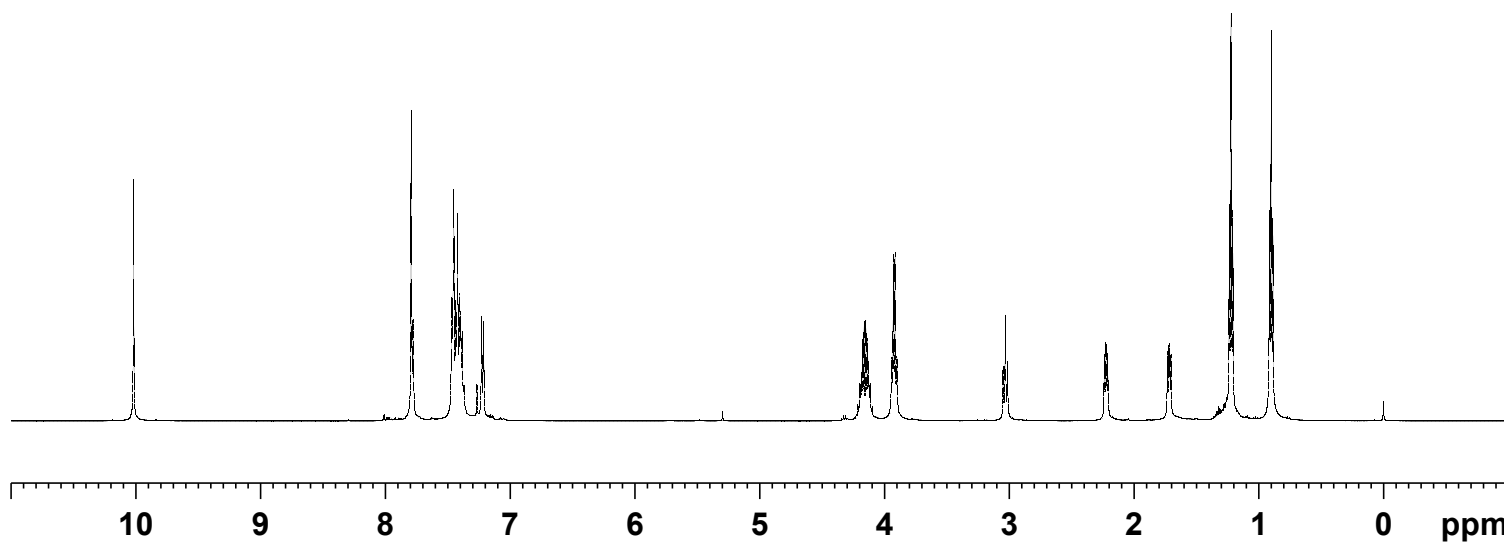

0.94

1.91  
5.03  
1.04

2.07  
2.13

1.00

1.05

1.16

3.54

3.20

— 191.80  
 { 168.71  
 { 166.25  
 { 144.94  
 { 139.59  
 { 139.27  
 { 135.27  
 { 131.06  
 { 129.27  
 { 128.29  
 { 128.01  
 { 127.80  
 { 126.91

{ 61.68  
 { 61.44

— 39.07  
 — 31.73

{ 19.22  
 { 14.14  
 { 13.75

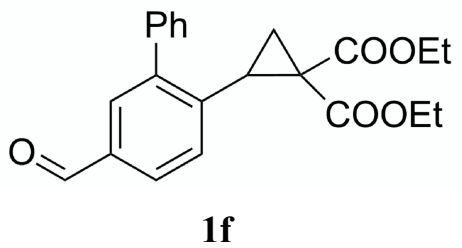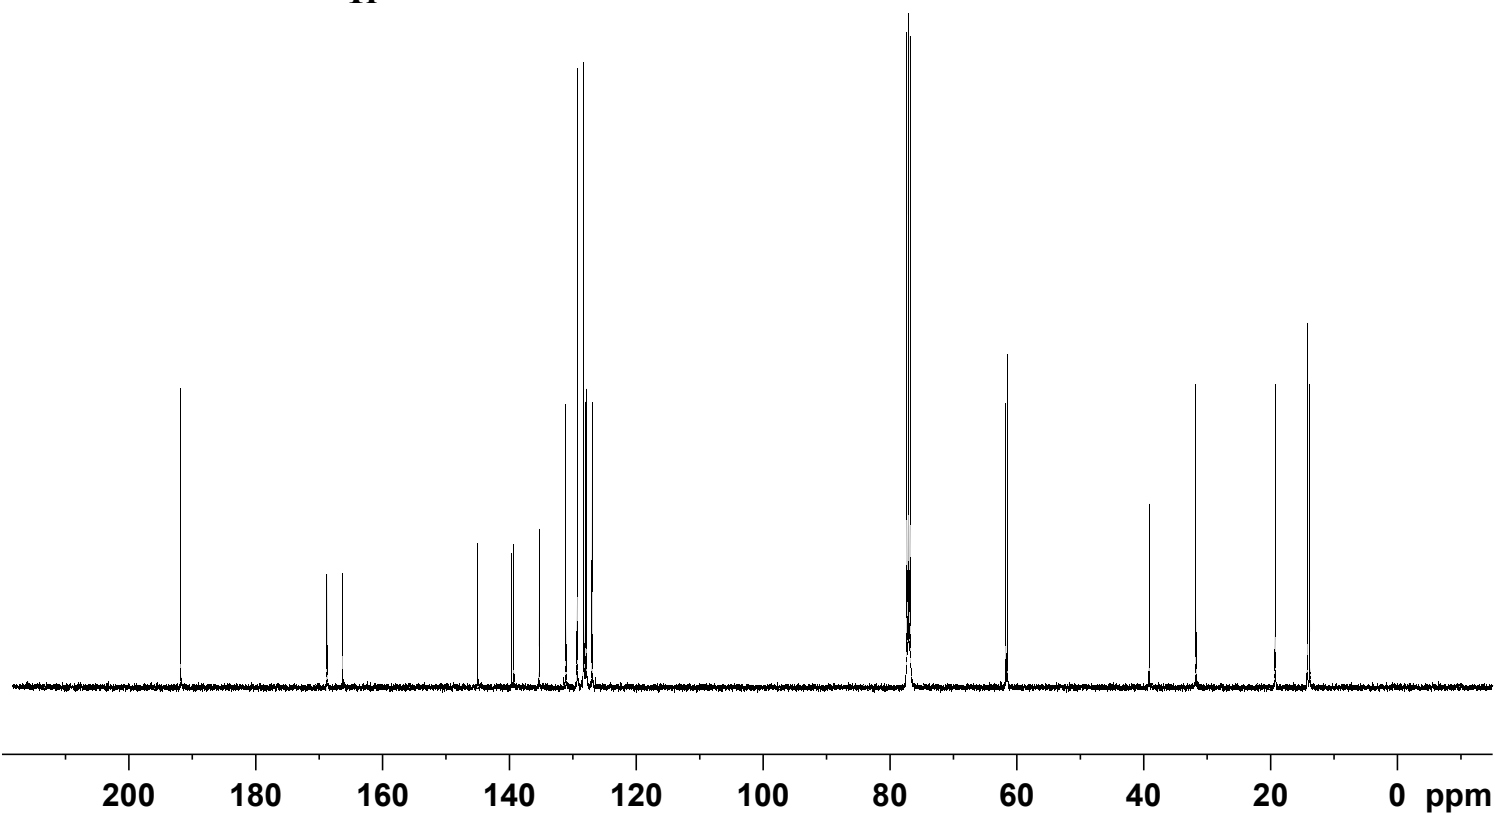

Current Data Parameters  
 NAME 500M-2022  
 EXPNO 37  
 PROCNO 1

F2 - Acquisition Parameters  
 Date\_ 20220315  
 Time 5.50  
 INSTRUM spect  
 PROBHD 5 mm CPPBBO BB  
 PULPROG zgpg30  
 TD 65536  
 SOLVENT CDCl3  
 NS 300  
 DS 4  
 SWH 29761.904 Hz  
 FIDRES 0.454131 Hz  
 AQ 1.1010048 sec  
 RG 192.89  
 DW 16.800 usec  
 DE 18.00 usec  
 TE 298.2 K  
 D1 2.00000000 sec  
 D11 0.03000000 sec  
 TD0 1

==== CHANNEL f1 =====  
 SFO1 125.7703637 MHz  
 NUC1 13C  
 P1 10.50 usec  
 PLW1 57.00000000 W

==== CHANNEL f2 =====  
 SFO2 500.1320005 MHz  
 NUC2 1H  
 CPDPRG[2] waltz16  
 PCPD2 80.00 usec  
 PLW2 20.00000000 W  
 PLW12 0.39550999 W  
 PLW13 0.25312999 W

F2 - Processing parameters  
 SI 32768  
 SF 125.7577885 MHz  
 WDW EM  
 SSB 0  
 LB 1.00 Hz  
 GB 0  
 PC 1.40

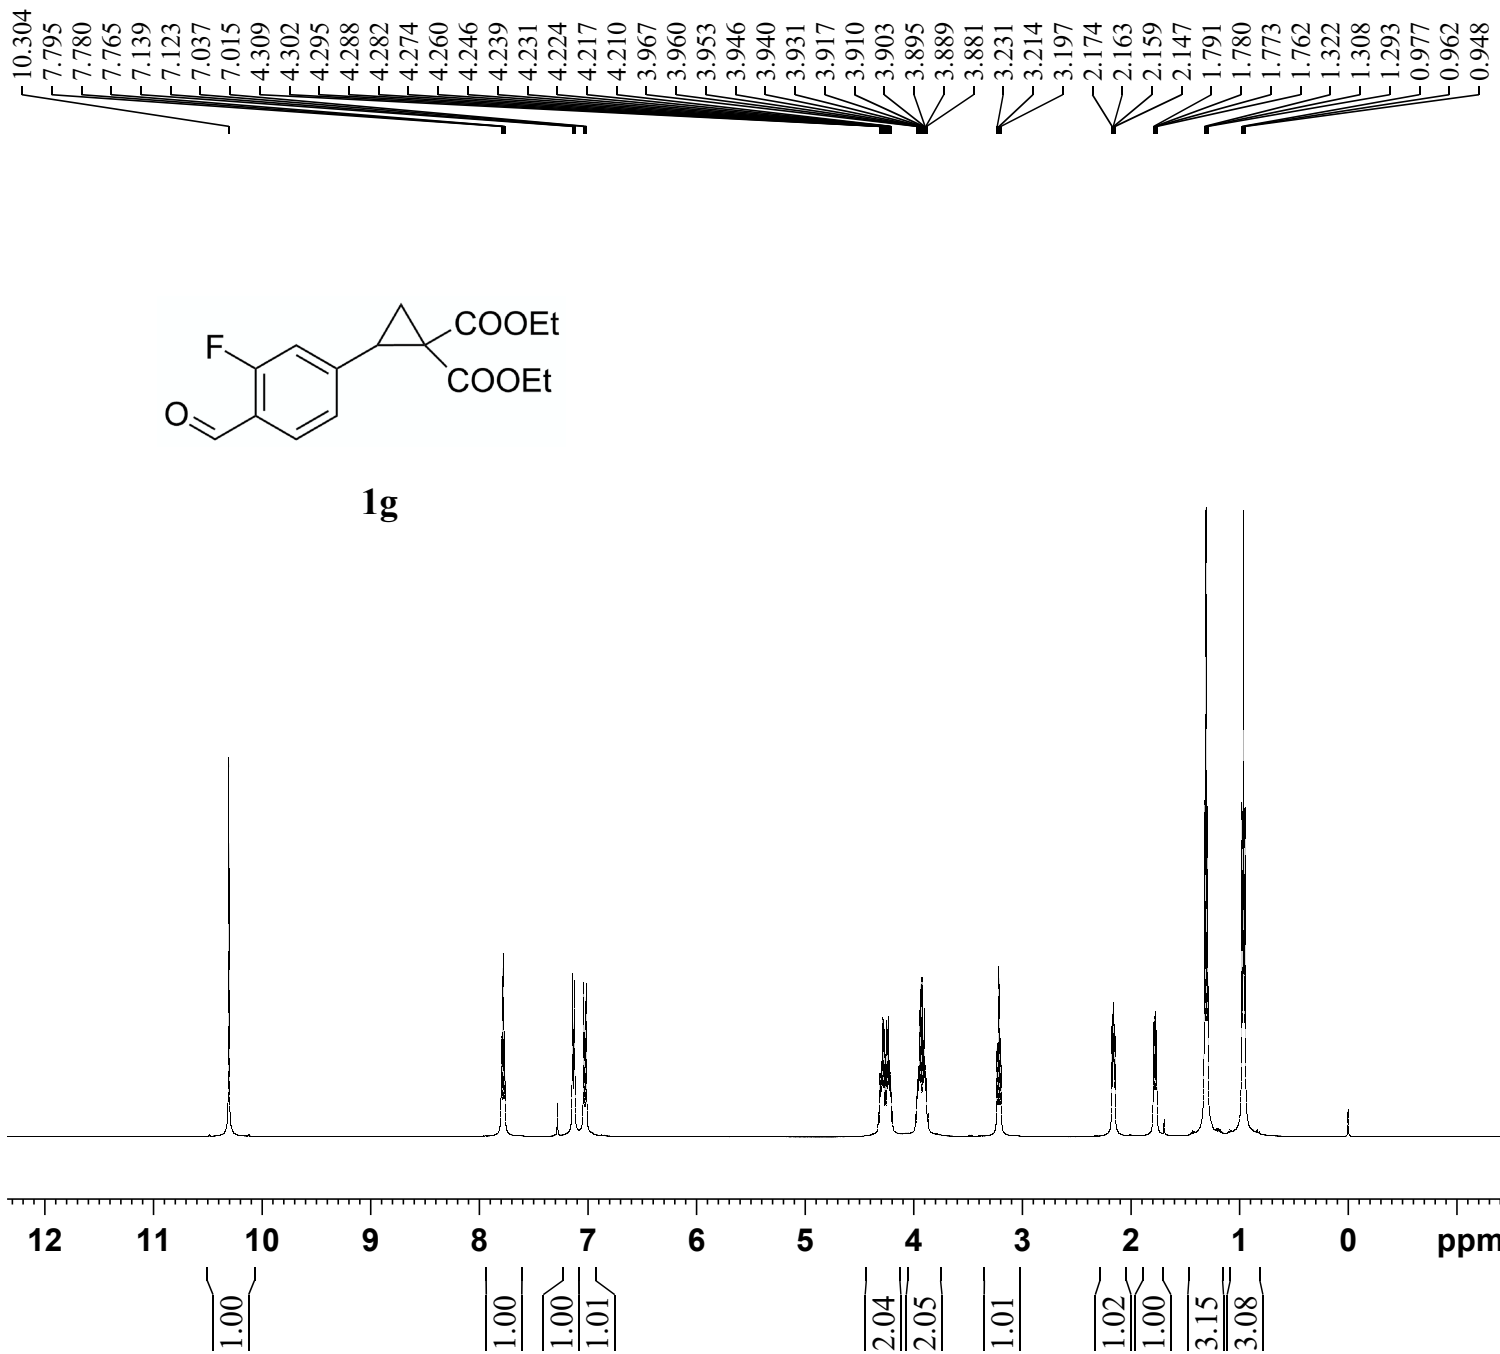

Current Data Parameters  
 NAME 500M-2020xia  
 EXPNO 239  
 PROCNO 1

F2 - Acquisition Parameters  
 Date\_ 20220208  
 Time 22.23  
 INSTRUM spect  
 PROBHD 5 mm CPPBBO BB  
 PULPROG zg30  
 TD 65536  
 SOLVENT CDCl3  
 NS 16  
 DS 2  
 SWH 10000.000 Hz  
 FIDRES 0.152588 Hz  
 AQ 3.2767999 sec  
 RG 31.72  
 DW 50.000 usec  
 DE 6.50 usec  
 TE 298.2 K  
 D1 1.00000000 sec  
 D11 0 sec  
 TD0 1

==== CHANNEL f1 =====  
 SFO1 500.1330885 MHz  
 NUC1 1H  
 P1 11.25 usec  
 PLW1 20.00000000 W

==== CHANNEL f2 =====  
 SFO2 500.1330885 MHz  
 NUC2 off  
 CPDPRG[2]  
 PCPD2 0 usec  
 PLW2 0 W  
 PLW12 0 W  
 PLW13 0 W

F2 - Processing parameters  
 SI 65536  
 SF 500.1300022 MHz  
 WDW EM  
 SSB 0  
 LB 0.30 Hz  
 GB 0  
 PC 1.00



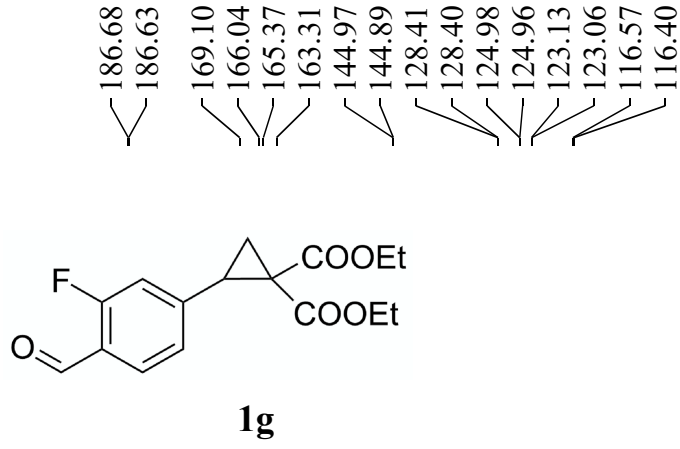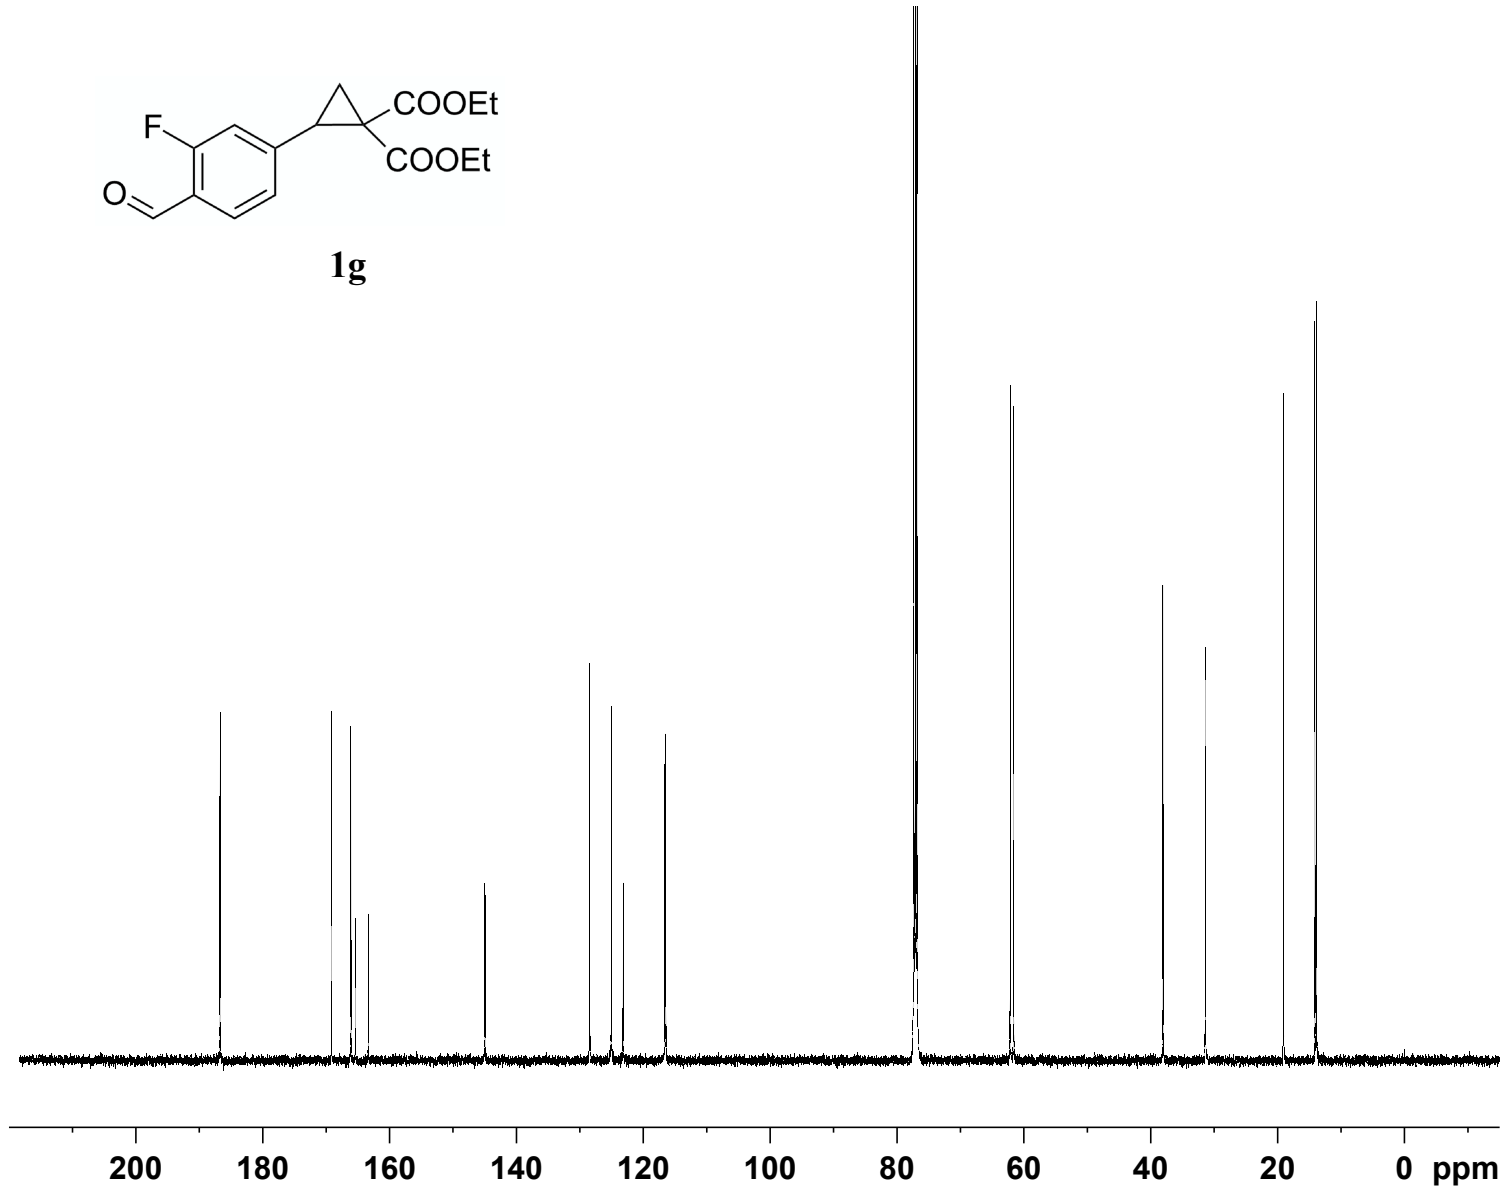

Current Data Parameters  
 NAME 500M-2020xia  
 EXPNO 240  
 PROCNO 1

F2 - Acquisition Parameters  
 Date\_ 20220208  
 Time 22.51  
 INSTRUM spect  
 PROBHD 5 mm CPPBBO BB  
 PULPROG zgpg30  
 TD 65536  
 SOLVENT CDCl3  
 NS 512  
 DS 4  
 SWH 29761.904 Hz  
 FIDRES 0.454131 Hz  
 AQ 1.1010048 sec  
 RG 192.89  
 DW 16.800 usec  
 DE 18.00 usec  
 TE 298.2 K  
 D1 2.00000000 sec  
 D11 0.03000000 sec  
 TD0 1

==== CHANNEL f1 =====  
 SFO1 125.7703637 MHz  
 NUC1 13C  
 P1 10.50 usec  
 PLW1 57.00000000 W

==== CHANNEL f2 =====  
 SFO2 500.1320005 MHz  
 NUC2 1H  
 CPDPRG[2] waltz16  
 PCPD2 80.00 usec  
 PLW2 20.00000000 W  
 PLW12 0.39550999 W  
 PLW13 0.25312999 W

F2 - Processing parameters  
 SI 32768  
 SF 125.7577885 MHz  
 WDW EM  
 SSB 0  
 LB 1.00 Hz  
 GB 0  
 PC 1.40

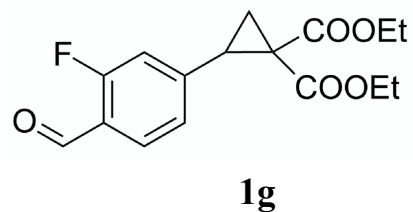

— -122.06

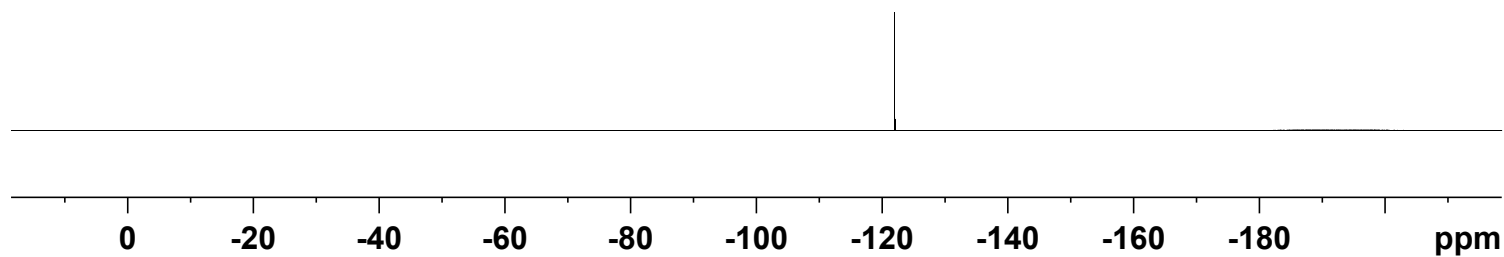

Current Data Parameters  
 NAME 400M-2023-F  
 EXPNO 9  
 PROCNO 1

F2 - Acquisition Parameters  
 Date\_ 20230506  
 Time 19.12  
 INSTRUM spect  
 PROBHD 5 mm PABBO BB/  
 PULPROG zgfhigqn.2  
 TD 131072  
 SOLVENT CDC13  
 NS 16  
 DS 4  
 SWH 89285.711 Hz  
 FIDRES 0.681196 Hz  
 AQ 0.7340032 sec  
 RG 206.33  
 DW 5.600 usec  
 DE 6.50 usec  
 TE 298.0 K  
 D1 1.00000000 sec  
 D11 0.03000000 sec  
 TD0 1

==== CHANNEL f1 =====  
 SFO1 376.5642094 MHz  
 NUC1 19F  
 P1 14.50 usec  
 PLW1 17.98900032 W

==== CHANNEL f2 =====  
 SFO2 400.2416010 MHz  
 NUC2 1H  
 CPDPRG[2] waltz16  
 PCPD2 90.00 usec  
 PLW2 12.00000000 W  
 PLW12 0.30294999 W  
 PLW13 0.24539000 W

F2 - Processing parameters  
 SI 65536  
 SF 376.6018696 MHz  
 WDW EM  
 SSB 0  
 LB 0.30 Hz  
 GB 0  
 PC 1.00

10.348  
9.277  
9.261  
8.321  
8.304  
7.915  
7.901  
7.712  
7.709  
7.695  
7.681  
7.679  
7.671  
7.668  
7.654  
7.653  
7.641  
7.639  
7.483  
7.469  
4.404  
4.390  
4.383  
4.368  
4.362  
4.354  
4.348  
4.333  
4.326  
4.312  
3.717  
3.700  
3.683  
3.593  
3.585  
3.571  
3.556  
3.542  
3.535  
3.528  
3.520  
2.452  
2.441  
2.436  
2.425  
1.878  
1.868  
1.860  
1.850  
1.373  
1.358  
1.344  
0.429  
0.415  
0.401

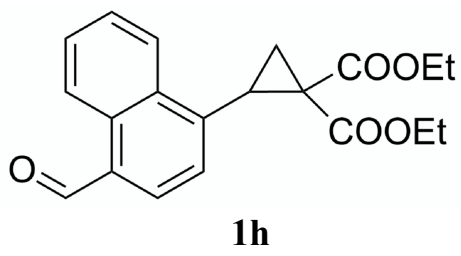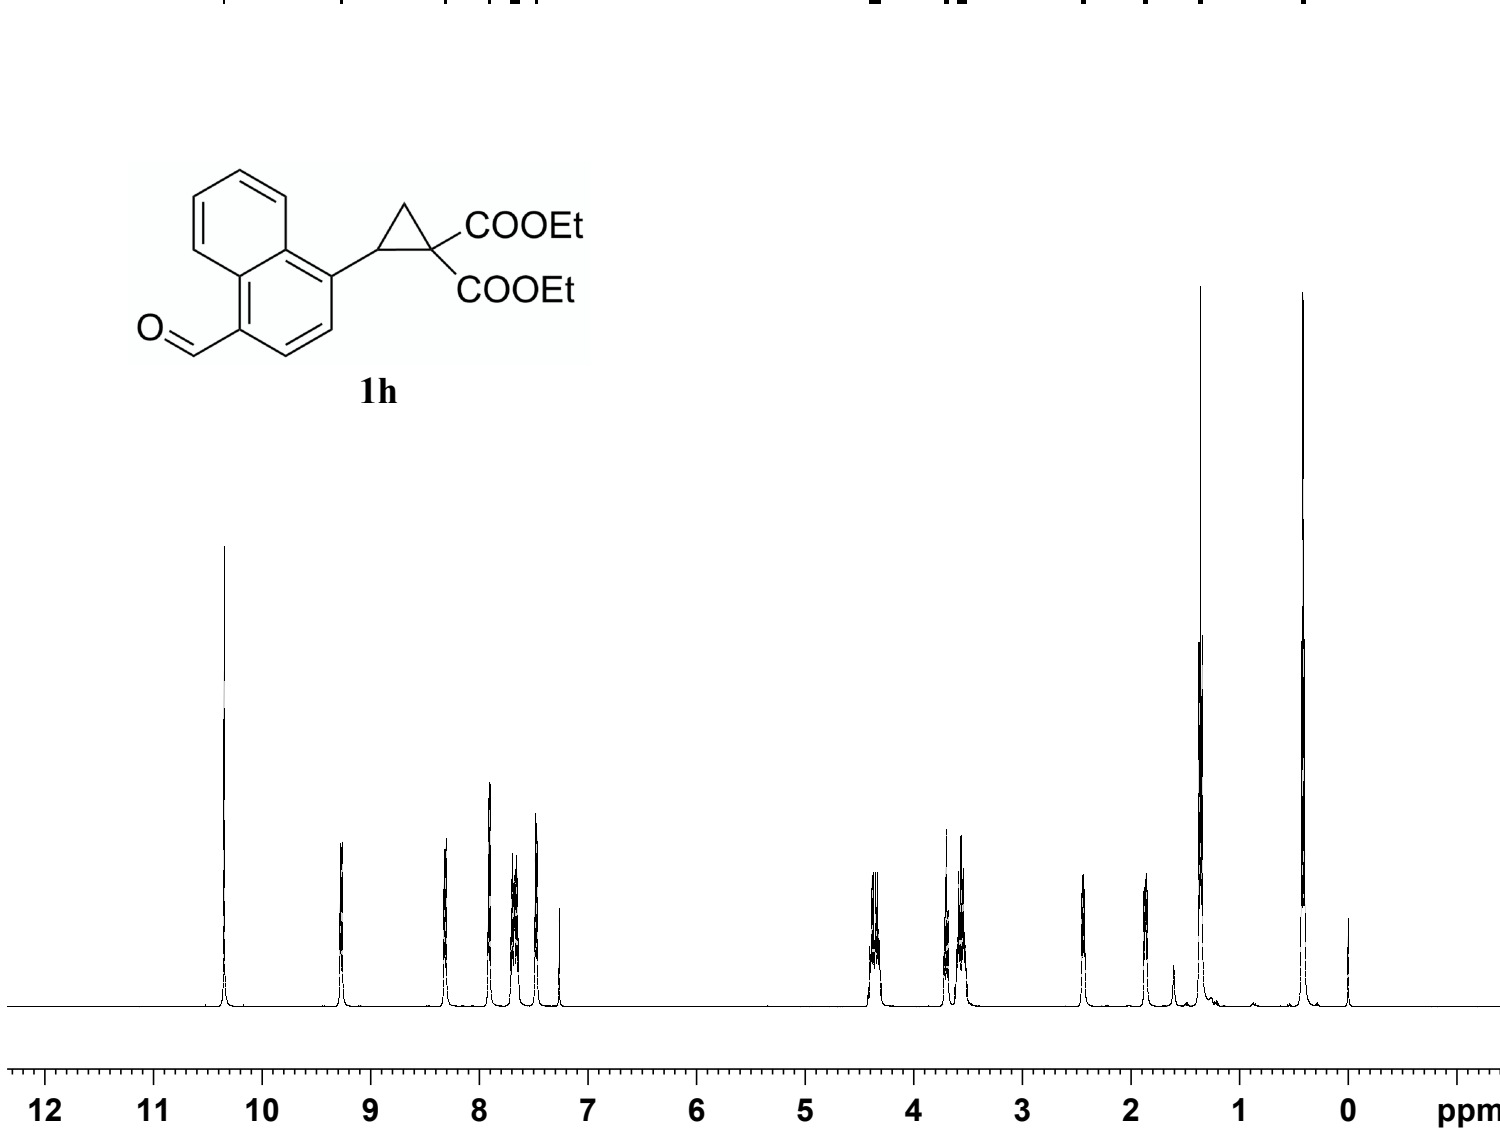

1.00  
0.98  
1.00  
1.01  
2.01  
1.02  
2.02  
0.99  
2.04  
1.01  
1.01  
3.19  
3.03

Current Data Parameters  
NAME 500M-2022  
EXPNO 101  
PROCNO 1

F2 - Acquisition Parameters  
Date\_ 20220608  
Time 20.47  
INSTRUM spect  
PROBHD 5 mm CPPBBO BB  
PULPROG zg30  
TD 65536  
SOLVENT CDCl3  
NS 16  
DS 2  
SWH 10000.000 Hz  
FIDRES 0.152588 Hz  
AQ 3.2767999 sec  
RG 31.72  
DW 50.000 usec  
DE 6.50 usec  
TE 298.2 K  
D1 1.00000000 sec  
D11 0 sec  
TD0 1

==== CHANNEL f1 =====  
SFO1 500.1330885 MHz  
NUC1 1H  
P1 11.25 usec  
PLW1 20.00000000 W

==== CHANNEL f2 =====  
SFO2 500.1330885 MHz  
NUC2 off  
CPDPRG[2]  
PCPD2 0 usec  
PLW2 0 W  
PLW12 0 W  
PLW13 0 W

F2 - Processing parameters  
SI 65536  
SF 500.1300116 MHz  
WDW EM  
SSB 0  
LB 0.30 Hz  
GB 0  
PC 1.00

— 193.28  
 — 169.49  
 — 166.37  
 — 138.98  
 — 136.00  
 — 133.42  
 — 131.10  
 — 130.38  
 — 128.90  
 — 127.22  
 — 125.20  
 — 125.00  
 — 124.96

— 62.08  
 — 61.12  
 — 37.29  
 — 30.01  
 — 18.37  
 — 14.14  
 — 13.21

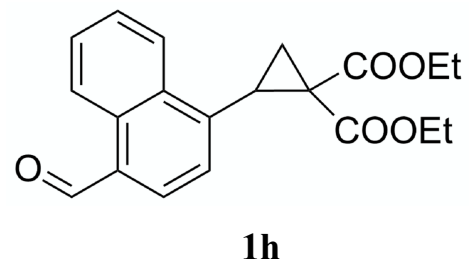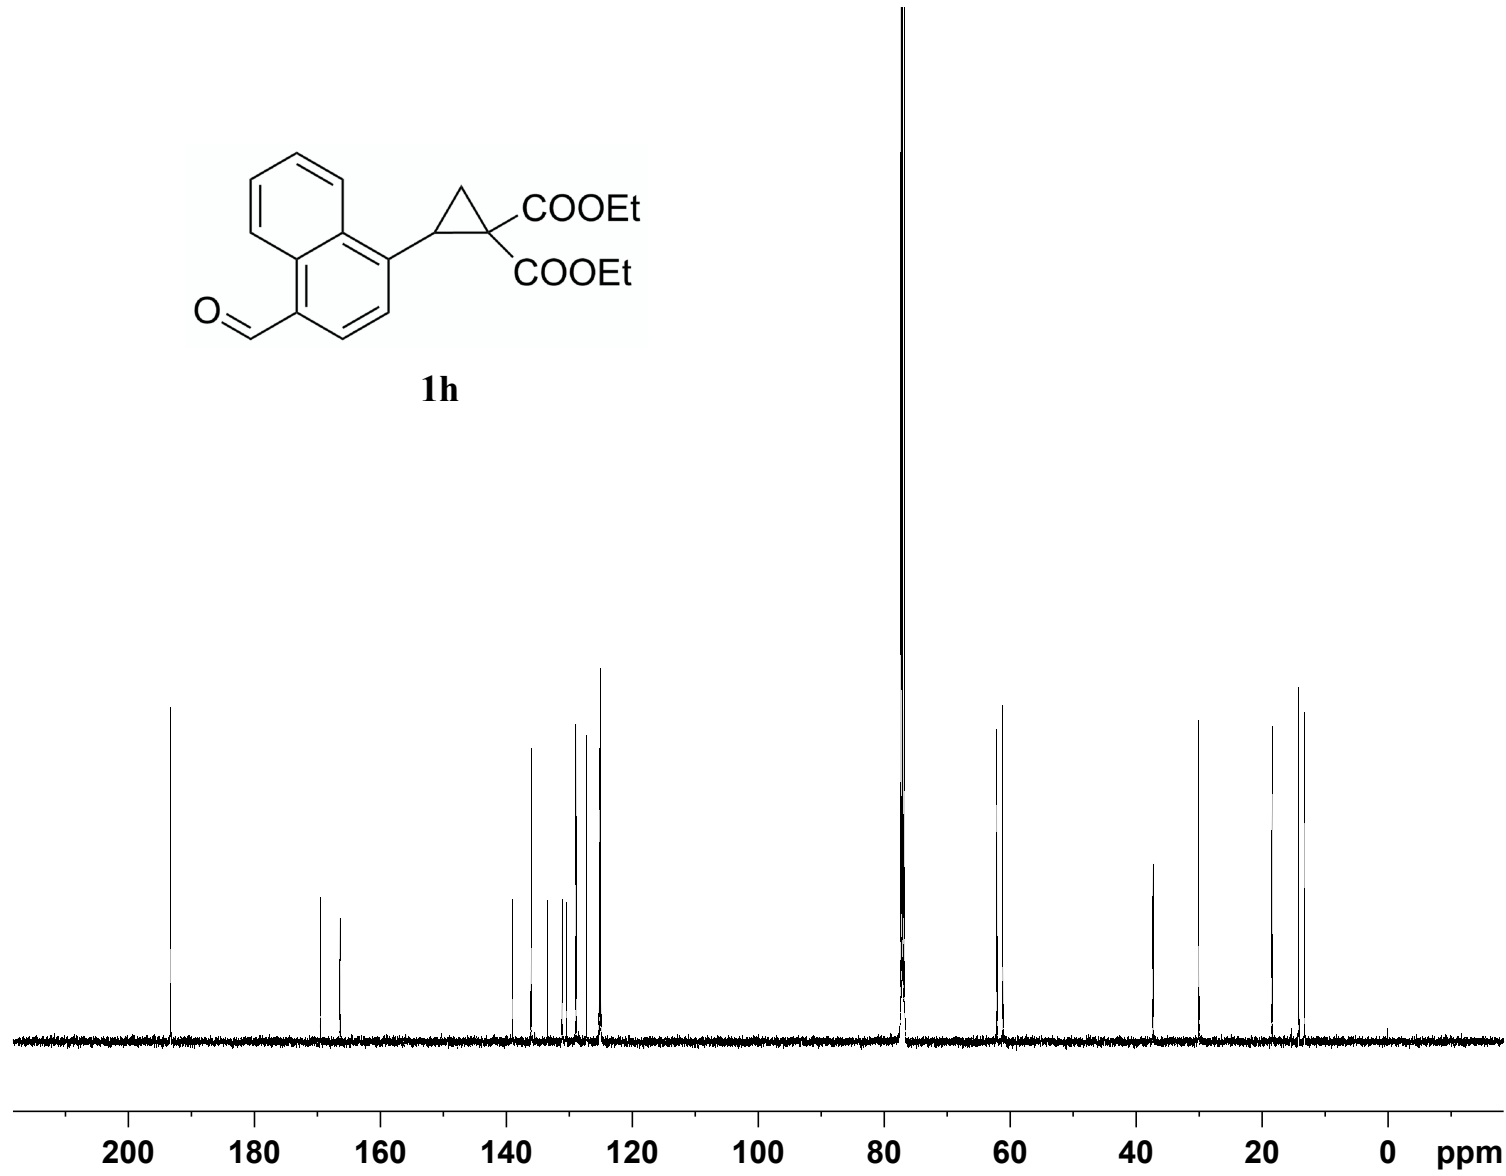

Current Data Parameters  
 NAME 500M-2022  
 EXPNO 20  
 PROCNO 1  
  
 F2 - Acquisition Parameters  
 Date\_ 20220226  
 Time 6.41  
 INSTRUM spect  
 PROBHD 5 mm CPPBBO BB  
 PULPROG zgpg30  
 TD 65536  
 SOLVENT CDCl3  
 NS 256  
 DS 4  
 SWH 29761.904 Hz  
 FIDRES 0.454131 Hz  
 AQ 1.1010048 sec  
 RG 192.89  
 DW 16.800 usec  
 DE 18.00 usec  
 TE 298.2 K  
 D1 2.00000000 sec  
 D11 0.03000000 sec  
 TD0 1

===== CHANNEL f1 =====  
 SFO1 125.7703637 MHz  
 NUC1 13C  
 P1 10.50 usec  
 PLW1 57.00000000 W

===== CHANNEL f2 =====  
 SFO2 500.1320005 MHz  
 NUC2 1H  
 CPDPRG[2] waltz16  
 PCPD2 80.00 usec  
 PLW2 20.00000000 W  
 PLW12 0.39550999 W  
 PLW13 0.25312999 W

F2 - Processing parameters  
 SI 32768  
 SF 125.7577885 MHz  
 WDW EM  
 SSB 0  
 LB 1.00 Hz  
 GB 0  
 PC 1.40

9.808  
7.590  
7.582  
6.943  
6.935  
4.304  
4.297  
4.290  
4.283  
4.276  
4.269  
4.254  
4.240  
4.226  
4.218  
4.211  
4.204  
4.190  
4.023  
4.016  
4.009  
4.001  
3.987  
3.976  
3.962  
3.955  
3.948  
3.940  
3.311  
3.294  
3.277  
2.146  
2.135  
2.131  
2.120  
1.871  
1.861  
1.853  
1.842  
1.317  
1.303  
1.289  
1.035  
1.021  
1.007

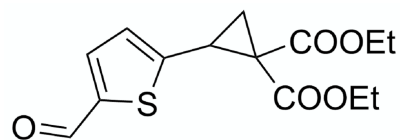

**1i**

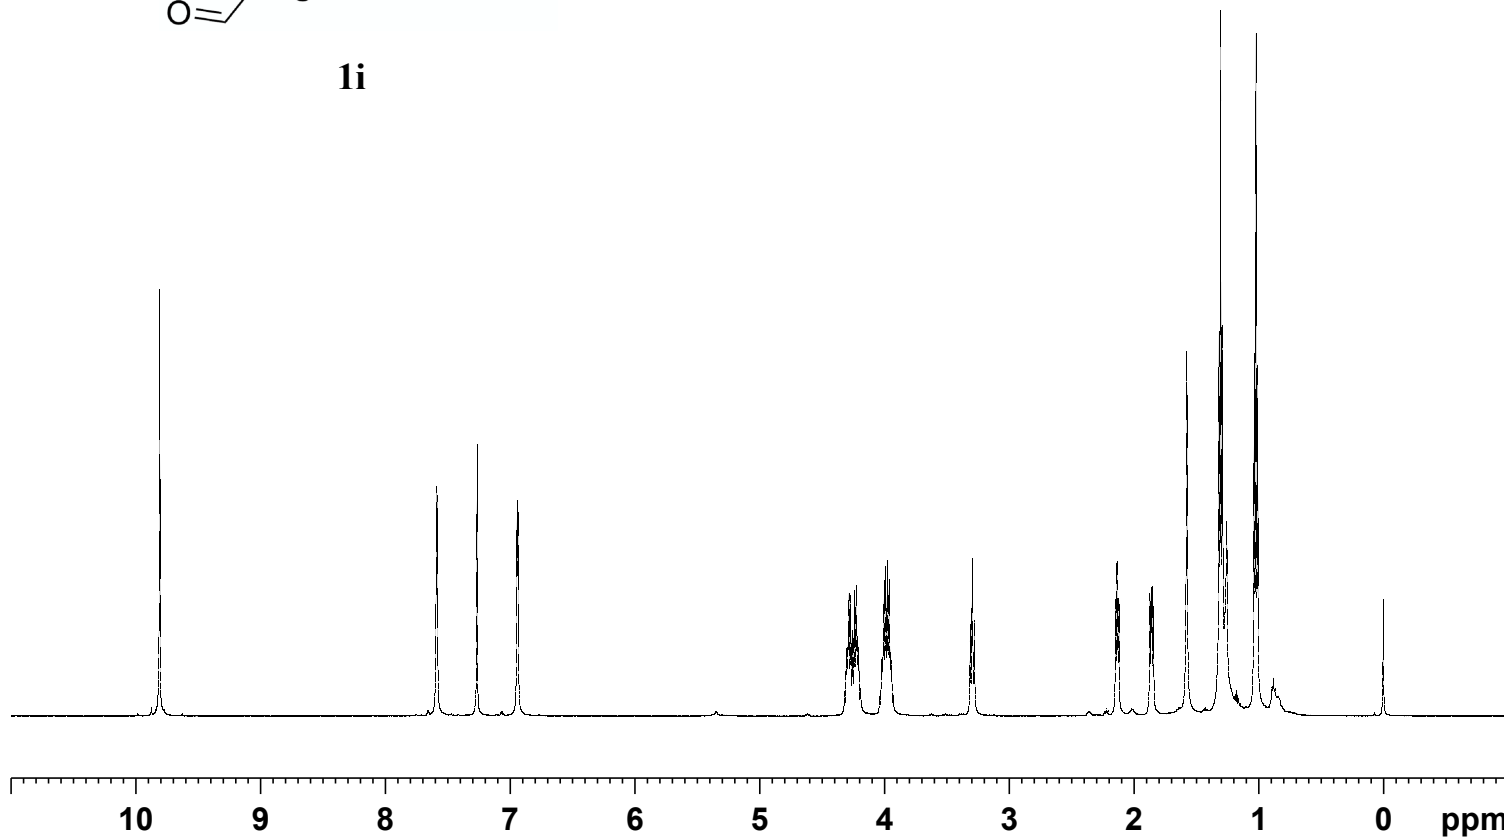

0.97  
1.00  
0.99  
2.12  
2.02  
0.98  
1.03  
1.03  
3.70  
3.21

Current Data Parameters  
 NAME 500M-2022  
 EXPNO 102  
 PROCNO 1

F2 - Acquisition Parameters  
 Date\_ 20220608  
 Time 20.52  
 INSTRUM spect  
 PROBHD 5 mm CPPBBO BB  
 PULPROG zg30  
 TD 65536  
 SOLVENT CDCl3  
 NS 16  
 DS 2  
 SWH 10000.000 Hz  
 FIDRES 0.152588 Hz  
 AQ 3.2767999 sec  
 RG 31.72  
 DW 50.000 usec  
 DE 6.50 usec  
 TE 298.2 K  
 D1 1.00000000 sec  
 D11 0 sec  
 TD0 1

==== CHANNEL f1 =====  
 SFO1 500.1330885 MHz  
 NUC1 1H  
 P1 11.25 usec  
 PLW1 20.00000000 W

==== CHANNEL f2 =====  
 SFO2 500.1330885 MHz  
 NUC2 off  
 CPDPRG[2]  
 PCPD2 0 usec  
 PLW2 0 W  
 PLW12 0 W  
 PLW13 0 W

F2 - Processing parameters  
 SI 65536  
 SF 500.1300113 MHz  
 WDW EM  
 SSB 0  
 LB 0.30 Hz  
 GB 0  
 PC 1.00

— 182.50  
 \ 168.82  
 / 165.86  
 — 149.54  
 — 142.87  
 — 136.15  
 — 127.33

< 62.17  
 > 61.71  
 — 38.62  
 — 26.89  
 — 20.76  
 < 14.06  
 > 13.80

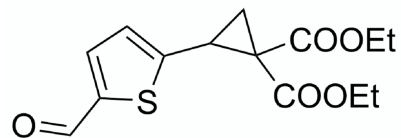

**1i**

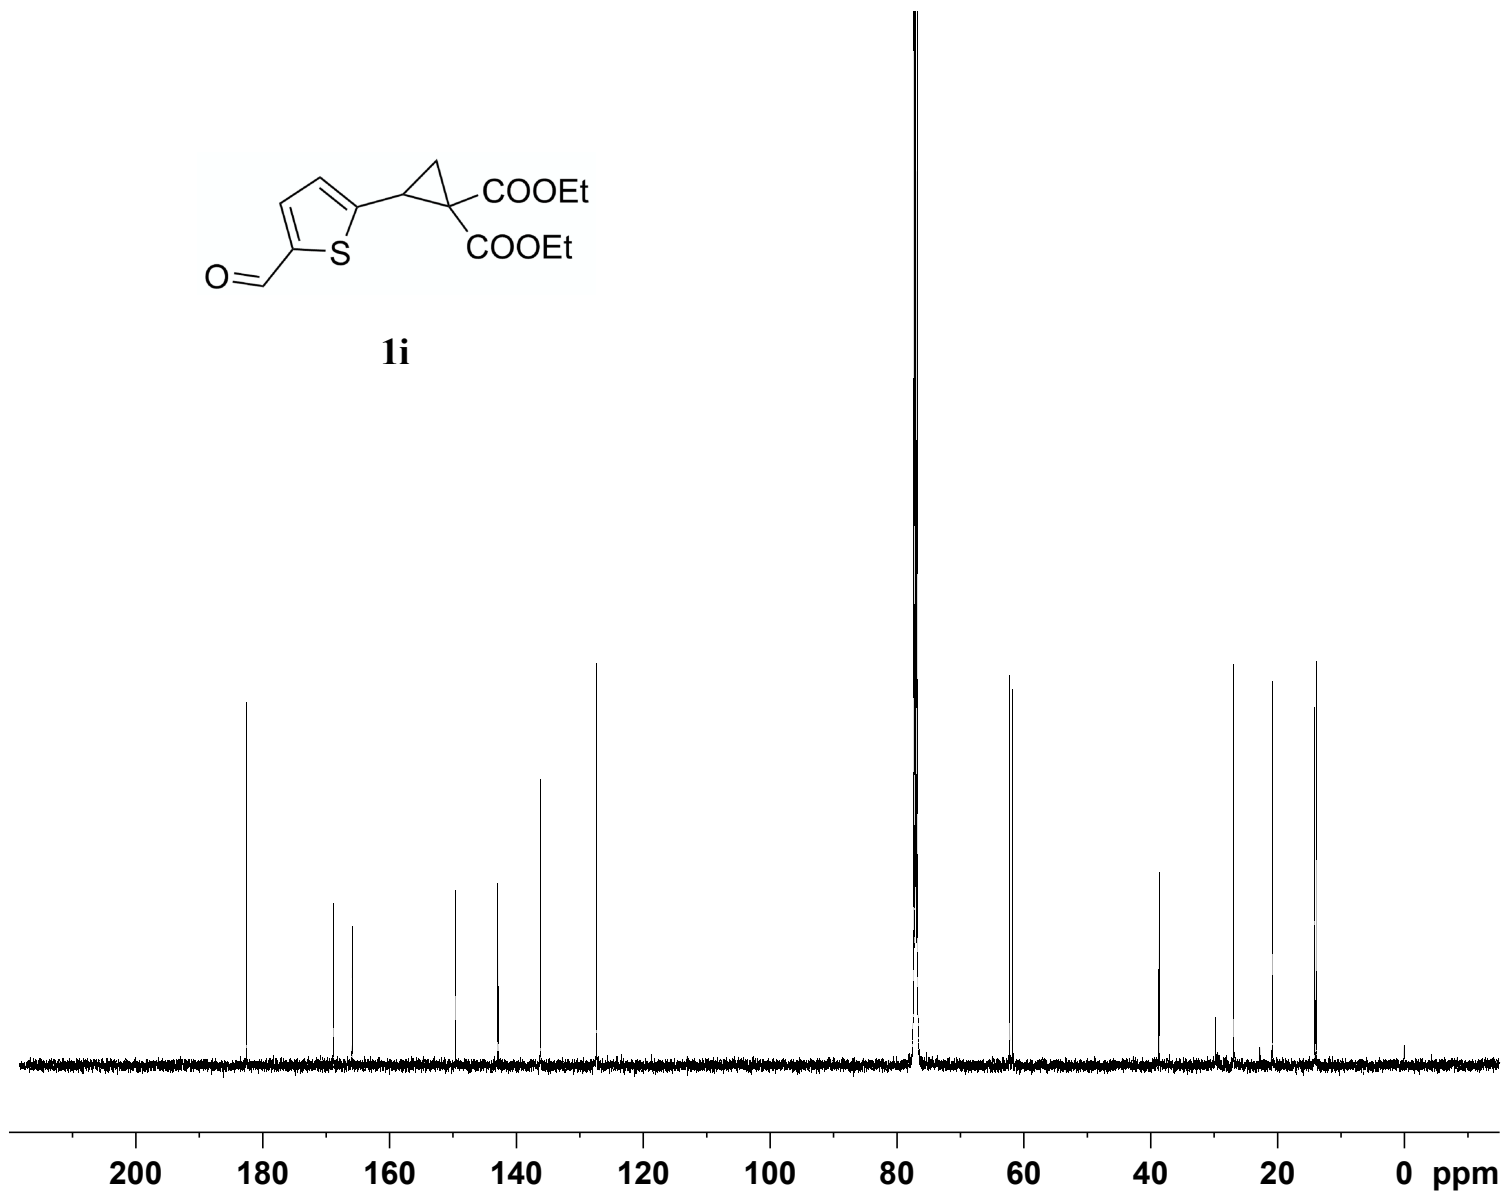

Current Data Parameters  
 NAME 500M-2022  
 EXPNO 103  
 PROCNO 1

F2 - Acquisition Parameters  
 Date\_ 20220608  
 Time 21.46  
 INSTRUM spect  
 PROBHD 5 mm CPPBBO BB  
 PULPROG zgpg30  
 TD 65536  
 SOLVENT CDCl3  
 NS 1024  
 DS 4  
 SWH 29761.904 Hz  
 FIDRES 0.454131 Hz  
 AQ 1.1010048 sec  
 RG 192.89  
 DW 16.800 usec  
 DE 18.00 usec  
 TE 298.2 K  
 D1 2.00000000 sec  
 D11 0.03000000 sec  
 TD0 1

==== CHANNEL f1 =====  
 SFO1 125.7703637 MHz  
 NUC1 13C  
 P1 10.50 usec  
 PLW1 57.00000000 W

==== CHANNEL f2 =====  
 SFO2 500.1320005 MHz  
 NUC2 1H  
 CPDPRG[2] waltz16  
 PCPD2 80.00 usec  
 PLW2 20.00000000 W  
 PLW12 0.39550999 W  
 PLW13 0.25312999 W

F2 - Processing parameters  
 SI 32768  
 SF 125.7577885 MHz  
 WDW EM  
 SSB 0  
 LB 1.00 Hz  
 GB 0  
 PC 1.40

— 9.982

7.810  
7.793  
7.371  
7.355

3.808  
3.386  
3.289  
3.272  
3.255  
2.255  
2.244  
2.239  
2.229  
1.829  
1.818  
1.810  
1.800

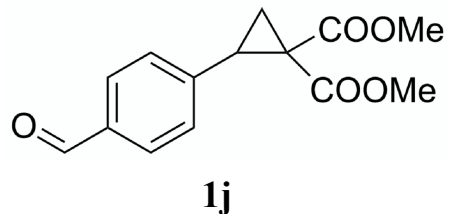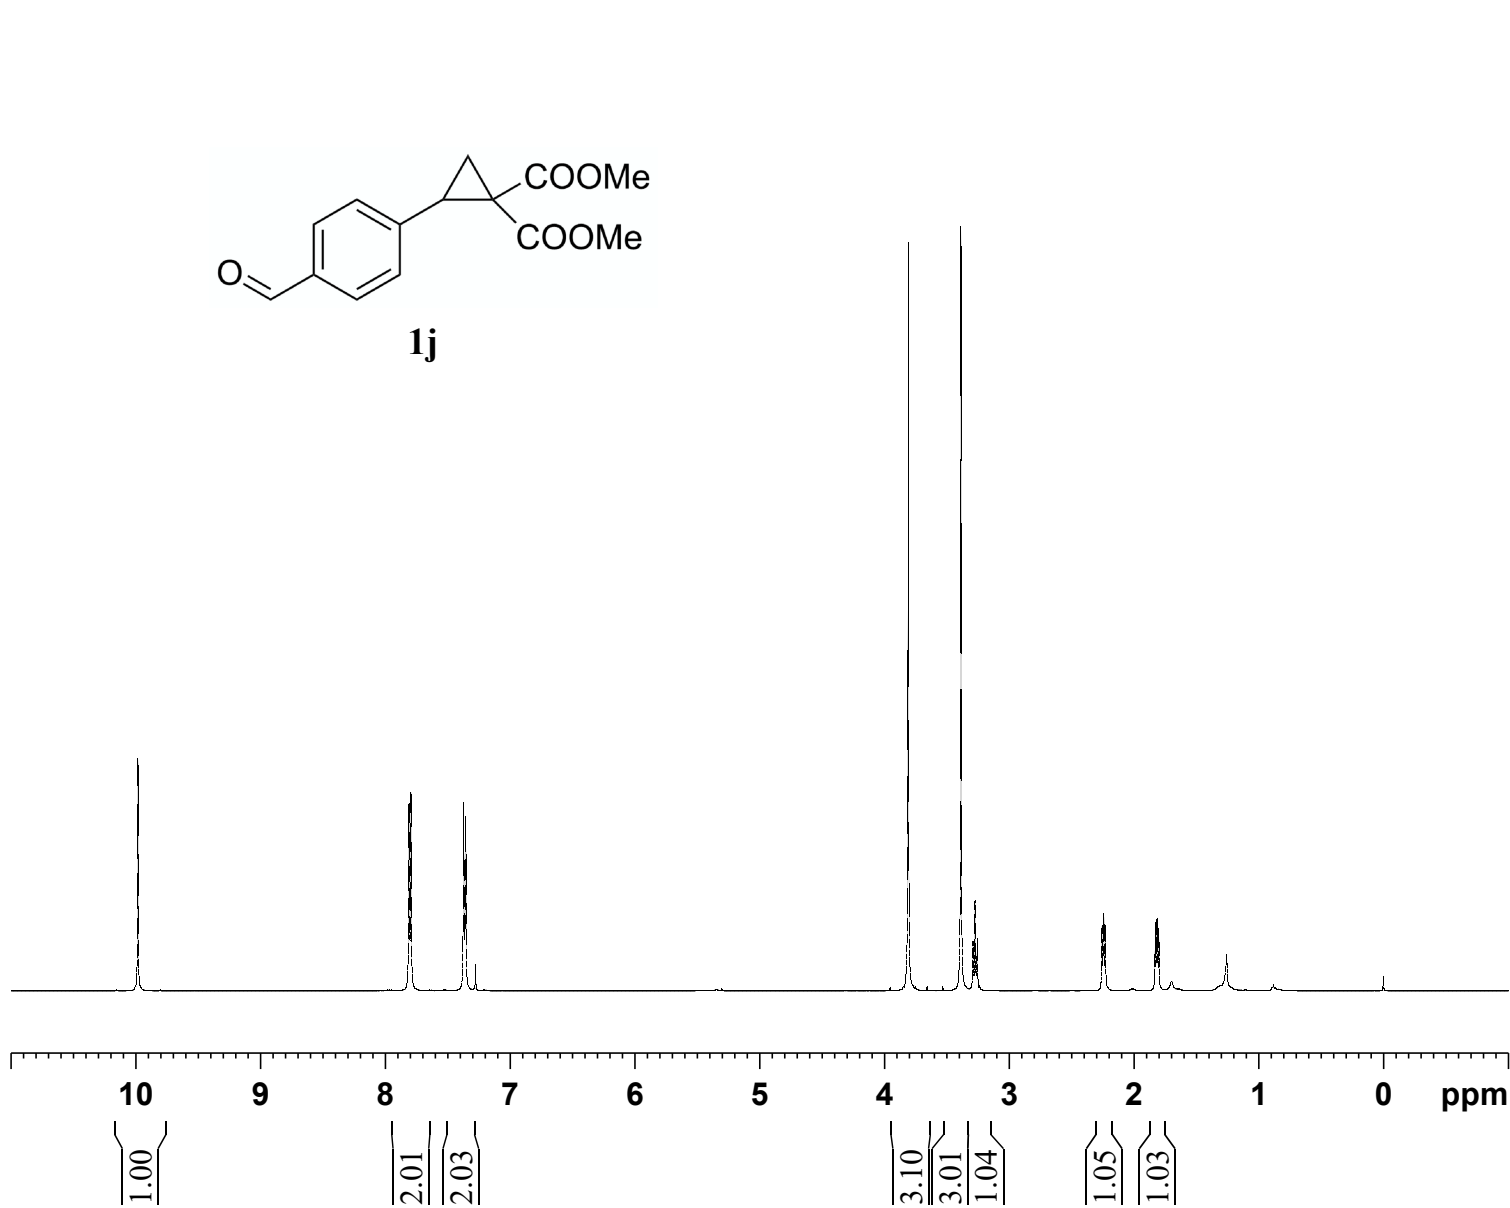

Current Data Parameters  
NAME 500M-2022  
EXPNO 98  
PROCNO 1

F2 - Acquisition Parameters  
Date\_ 20220608  
Time 20.25  
INSTRUM spect  
PROBHD 5 mm CPPBBO BB  
PULPROG zg30  
TD 65536  
SOLVENT CDCl3  
NS 16  
DS 2  
SWH 10000.000 Hz  
FIDRES 0.152588 Hz  
AQ 3.2767999 sec  
RG 31.72  
DW 50.000 usec  
DE 6.50 usec  
TE 298.2 K  
D1 1.00000000 sec  
D11 0 sec  
TD0 1

==== CHANNEL f1 =====  
SFO1 500.1330885 MHz  
NUC1 1H  
P1 11.25 usec  
PLW1 20.00000000 W

==== CHANNEL f2 =====  
SFO2 500.1330885 MHz  
NUC2 off  
CPDPRG[2]  
PCPD2 0 usec  
PLW2 0 W  
PLW12 0 W  
PLW13 0 W

F2 - Processing parameters  
SI 65536  
SF 500.1300052 MHz  
WDW EM  
SSB 0  
LB 0.30 Hz  
GB 0  
PC 1.00

— 191.81  
 — 169.79  
 — 166.70  
 — 141.86  
 — 135.48  
 — 129.60  
 — 129.08

— 53.06  
 — 52.50  
 — 37.67  
 — 32.15  
 — 19.29

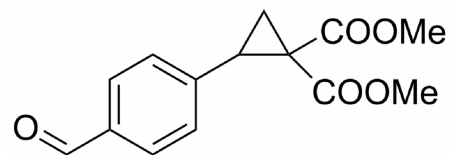

**1j**

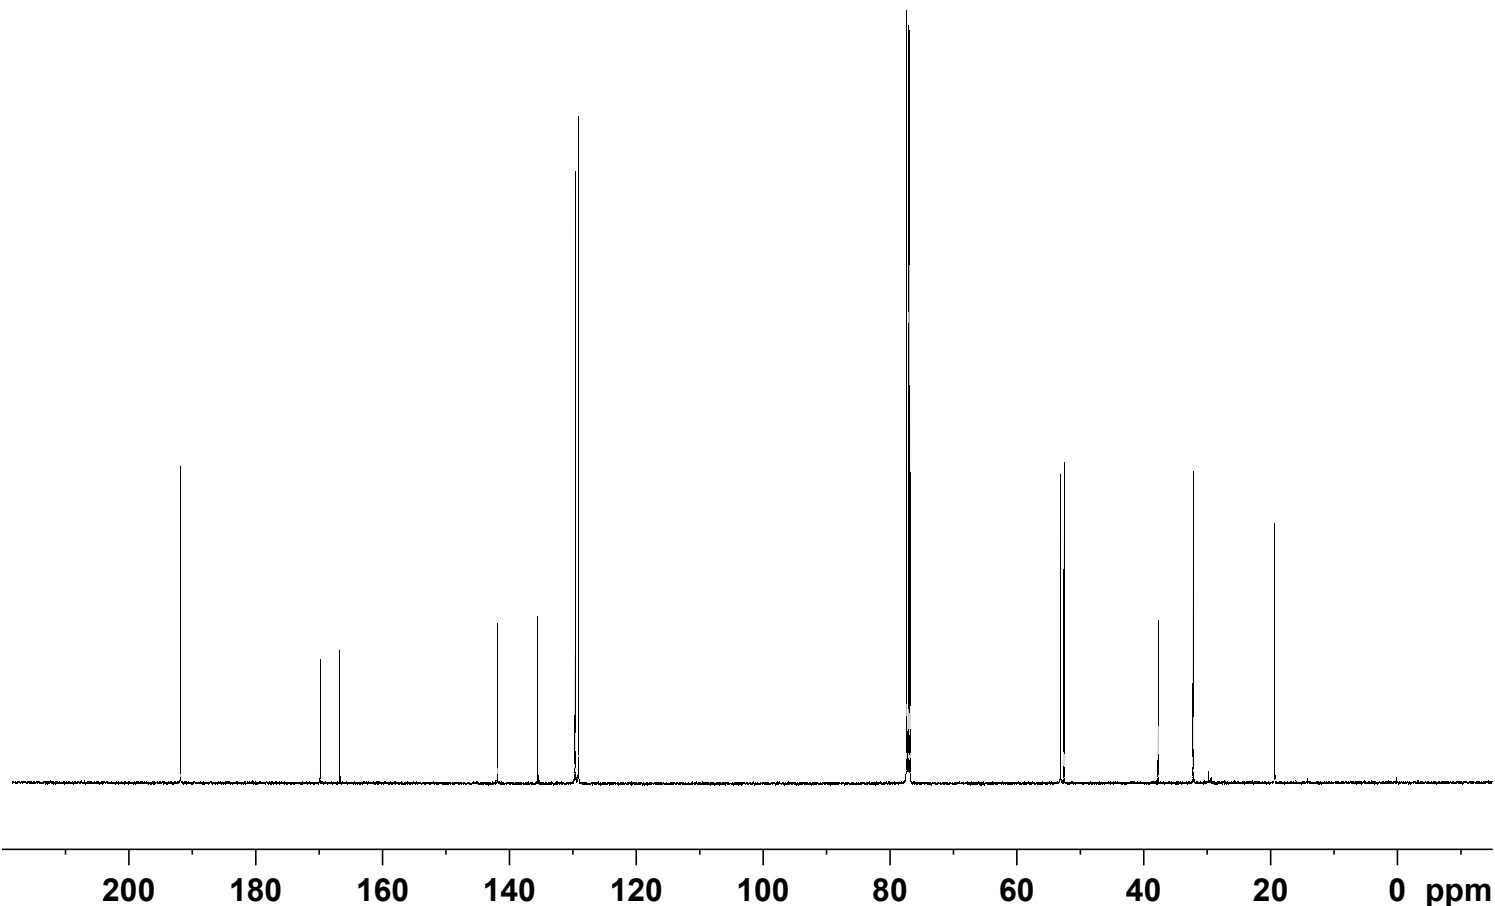

Current Data Parameters  
 NAME 500M-2020xia  
 EXPNO 174  
 PROCNO 1

F2 - Acquisition Parameters  
 Date\_ 20211121  
 Time 21.32  
 INSTRUM spect  
 PROBHD 5 mm CPPBBO BB  
 PULPROG zgpg30  
 TD 65536  
 SOLVENT CDCl3  
 NS 512  
 DS 4  
 SWH 29761.904 Hz  
 FIDRES 0.454131 Hz  
 AQ 1.1010048 sec  
 RG 192.89  
 DW 16.800 usec  
 DE 18.00 usec  
 TE 0 K  
 D1 2.00000000 sec  
 D11 0.03000000 sec  
 TD0 1

==== CHANNEL f1 =====  
 SFO1 125.7703637 MHz  
 NUC1 13C  
 P1 9.80 usec  
 PLW1 57.00000000 W

==== CHANNEL f2 =====  
 SFO2 500.1320005 MHz  
 NUC2 1H  
 CPDPRG[2] waltz16  
 PCPD2 80.00 usec  
 PLW2 20.00000000 W  
 PLW12 0.35778001 W  
 PLW13 0.22898000 W

F2 - Processing parameters  
 SI 32768  
 SF 125.7577885 MHz  
 WDW EM  
 SSB 0  
 LB 1.00 Hz  
 GB 0  
 PC 1.40



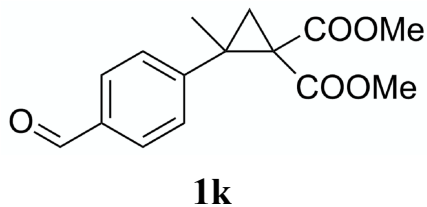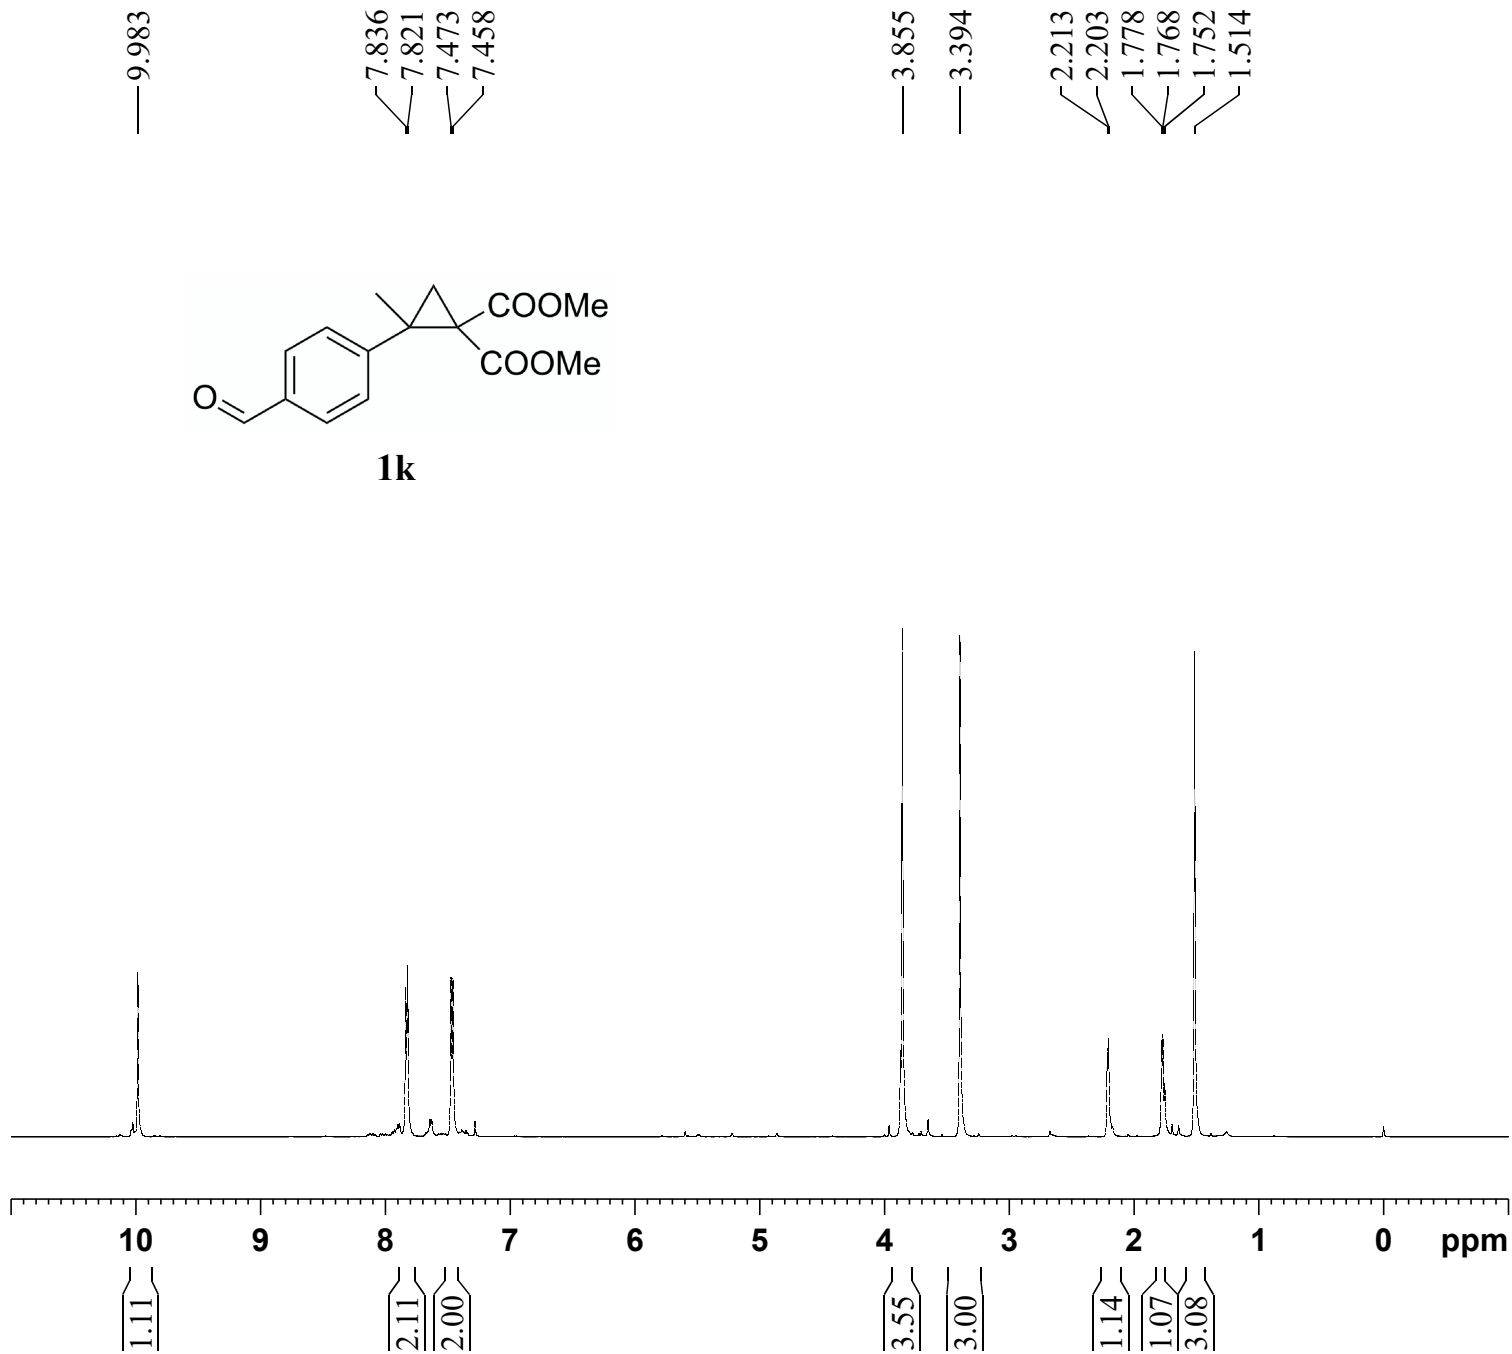

Current Data Parameters  
 NAME 500M-2020xia  
 EXPNO 171  
 PROCNO 1

F2 - Acquisition Parameters  
 Date\_ 20211121  
 Time 20.33  
 INSTRUM spect  
 PROBHD 5 mm CPPBBO BB  
 PULPROG zg30  
 TD 65536  
 SOLVENT CDCl3  
 NS 16  
 DS 2  
 SWH 10000.000 Hz  
 FIDRES 0.152588 Hz  
 AQ 3.2767999 sec  
 RG 31.72  
 DW 50.000 usec  
 DE 6.50 usec  
 TE 0 K  
 D1 1.00000000 sec  
 D11 0 sec  
 TD0 1

==== CHANNEL f1 =====  
 SFO1 500.1330885 MHz  
 NUC1 1H  
 P1 10.59 usec  
 PLW1 20.00000000 W

==== CHANNEL f2 =====  
 SFO2 500.1330885 MHz  
 NUC2 off  
 CPDPRG[2]  
 PCPD2 0 usec  
 PLW2 0 W  
 PLW12 0 W  
 PLW13 0 W

F2 - Processing parameters  
 SI 65536  
 SF 500.1300006 MHz  
 WDW EM  
 SSB 0  
 LB 0.30 Hz  
 GB 0  
 PC 1.00

— 191.90  
 — 168.32  
 — 167.93  
 — 148.23  
 — 135.22  
 — 129.84  
 — 129.03  
 — 52.86  
 — 52.45  
 — 40.36  
 — 37.63  
 — 25.02  
 — 24.24

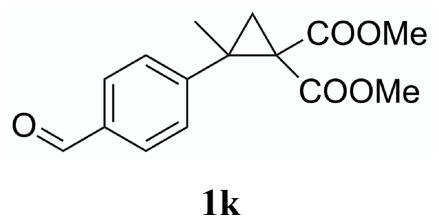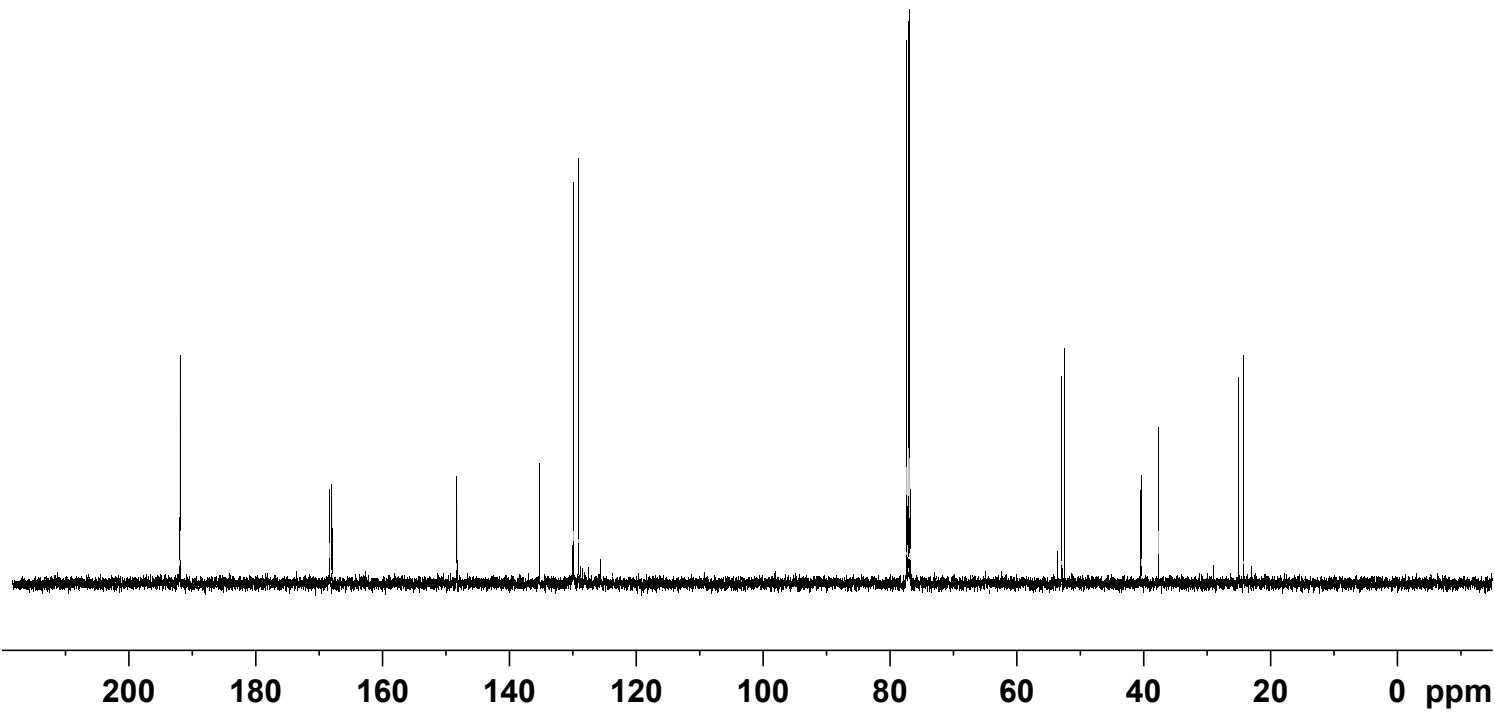

Current Data Parameters  
 NAME 500M-2020xia  
 EXPNO 182  
 PROCNO 1

F2 - Acquisition Parameters  
 Date\_ 20211122  
 Time 9.58  
 INSTRUM spect  
 PROBHD 5 mm CPPBBO BB  
 PULPROG zgpg30  
 TD 65536  
 SOLVENT CDCl3  
 NS 9  
 DS 4  
 SWH 29761.904 Hz  
 FIDRES 0.454131 Hz  
 AQ 1.1010048 sec  
 RG 192.89  
 DW 16.800 usec  
 DE 18.00 usec  
 TE 0 K  
 D1 2.0000000 sec  
 D11 0.0300000 sec  
 TD0 1

===== CHANNEL f1 =====  
 SFO1 125.7703637 MHz  
 NUC1 13C  
 P1 9.80 usec  
 PLW1 57.0000000 W

===== CHANNEL f2 =====  
 SFO2 500.132005 MHz  
 NUC2 1H  
 CPDPRG[2] waltz16  
 PCPD2 80.00 usec  
 PLW2 20.0000000 W  
 PLW12 0.35778001 W  
 PLW13 0.22898000 W

F2 - Processing parameters  
 SI 32768  
 SF 125.7577885 MHz  
 WDW EM  
 SSB 0  
 LB 1.00 Hz  
 GB 0  
 PC 1.40

— 9.937

7.788  
7.772  
7.605  
7.589  
7.429  
7.415  
7.279  
7.264  
7.249  
7.215  
7.200  
7.186

3.488  
3.455  
2.573  
2.562  
2.482  
2.471

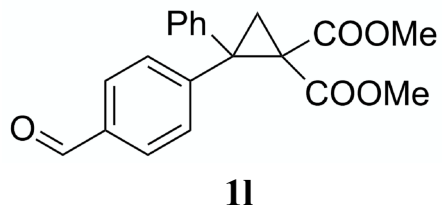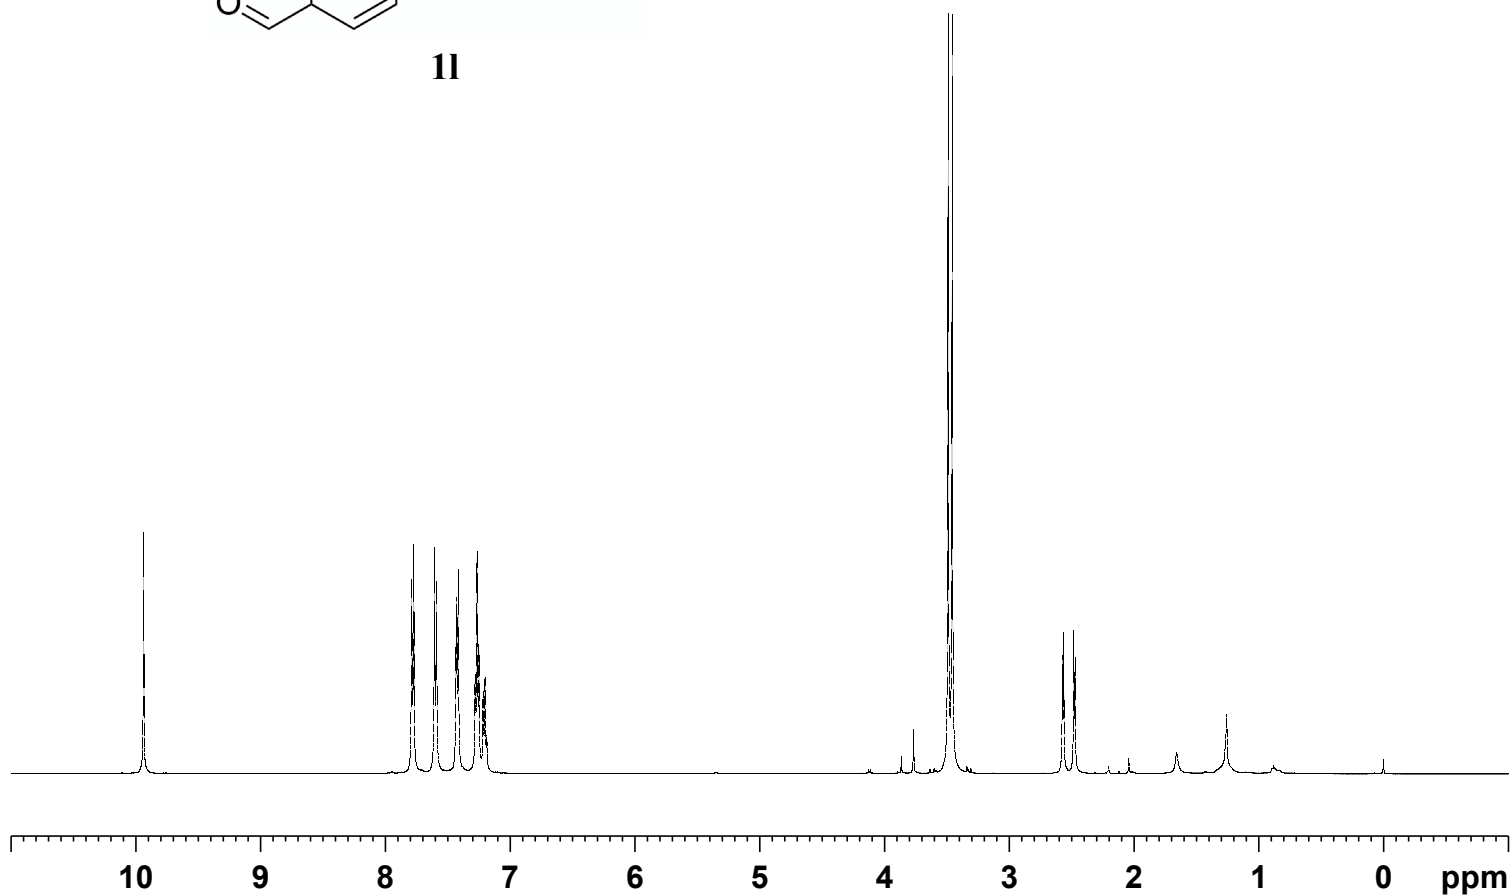

Current Data Parameters  
NAME 500M-2022  
EXPNO 99  
PROCNO 1

F2 - Acquisition Parameters  
Date\_ 20220608  
Time 20.29  
INSTRUM spect  
PROBHD 5 mm CPPBBO BB  
PULPROG zg30  
TD 65536  
SOLVENT CDCl3  
NS 16  
DS 2  
SWH 10000.000 Hz  
FIDRES 0.152588 Hz  
AQ 3.2767999 sec  
RG 31.72  
DW 50.000 usec  
DE 6.50 usec  
TE 298.2 K  
D1 1.00000000 sec  
D11 0 sec  
TD0 1

==== CHANNEL f1 =====  
SFO1 500.1330885 MHz  
NUC1 1H  
P1 11.25 usec  
PLW1 20.00000000 W

==== CHANNEL f2 =====  
SFO2 500.1330885 MHz  
NUC2 off  
CPDPRG[2]  
PCPD2 0 usec  
PLW2 0 W  
PLW12 0 W  
PLW13 0 W

F2 - Processing parameters  
SI 65536  
SF 500.1300117 MHz  
WDW EM  
SSB 0  
LB 0.30 Hz  
GB 0  
PC 1.00

— 191.64  
 < 167.54  
 < 167.11  
 < 147.18  
 < 139.12  
 < 135.24  
 < 129.84  
 < 129.55  
 < 128.88  
 < 128.59  
 < 127.77

< 52.59  
 < 52.50  
 < 46.86  
 < 41.28  
 — 23.81

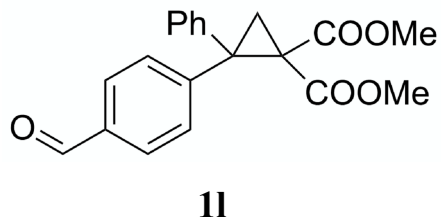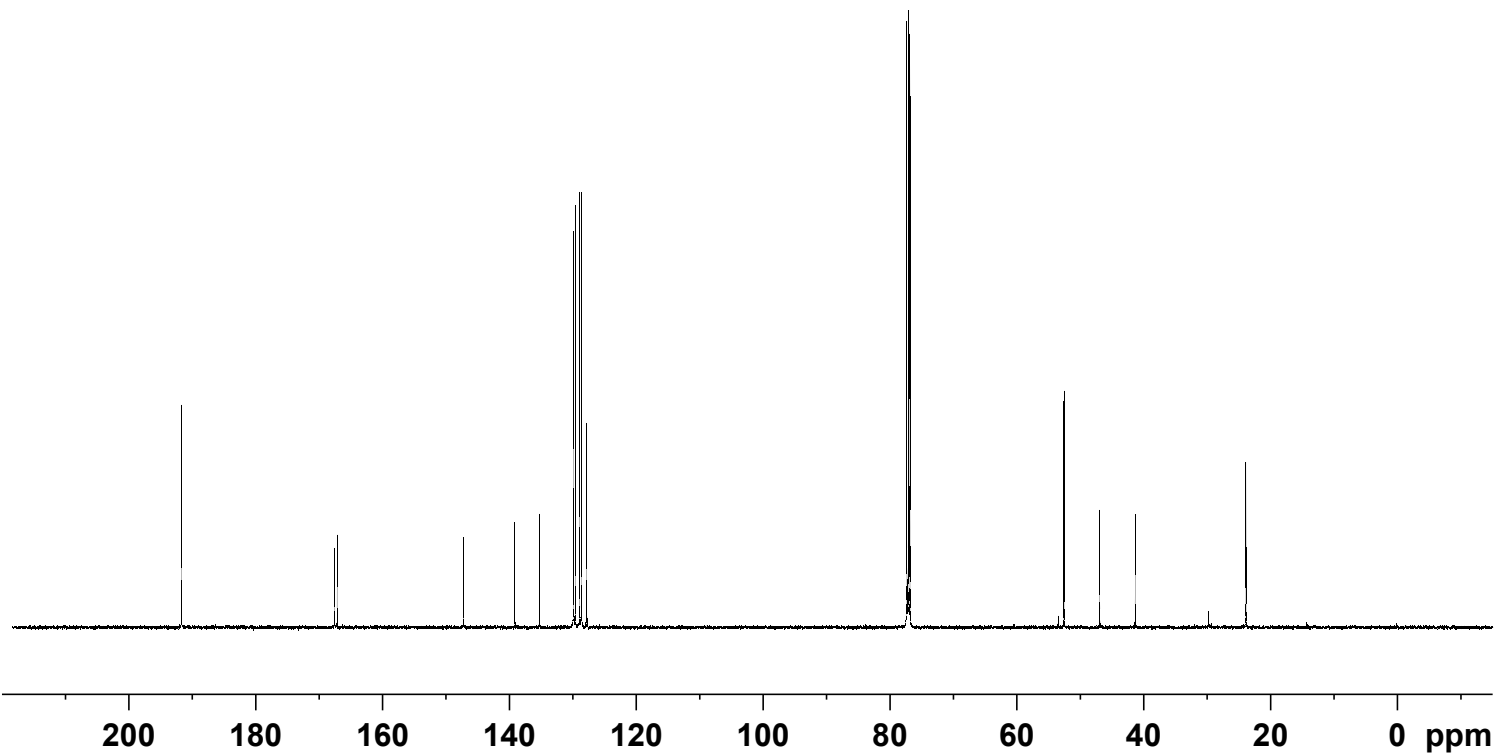

Current Data Parameters  
 NAME 500M-2022  
 EXPNO 100  
 PROCNO 1

F2 - Acquisition Parameters  
 Date\_ 20220608  
 Time 20.43  
 INSTRUM spect  
 PROBHD 5 mm CPPBBO BB  
 PULPROG zgpg30  
 TD 65536  
 SOLVENT CDCl3  
 NS 256  
 DS 4  
 SWH 29761.904 Hz  
 FIDRES 0.454131 Hz  
 AQ 1.1010048 sec  
 RG 192.89  
 DW 16.800 usec  
 DE 18.00 usec  
 TE 298.2 K  
 D1 2.00000000 sec  
 D11 0.03000000 sec  
 TD0 1

==== CHANNEL f1 =====  
 SFO1 125.7703637 MHz  
 NUC1 13C  
 P1 10.50 usec  
 PLW1 57.00000000 W

==== CHANNEL f2 =====  
 SFO2 500.1320005 MHz  
 NUC2 1H  
 CPDPRG[2] waltz16  
 PCPD2 80.00 usec  
 PLW2 20.00000000 W  
 PLW12 0.39550999 W  
 PLW13 0.25312999 W

F2 - Processing parameters  
 SI 32768  
 SF 125.7577885 MHz  
 WDW EM  
 SSB 0  
 LB 1.00 Hz  
 GB 0  
 PC 1.40

—9.989

7.835  
7.819  
7.511  
7.496

3.823  
3.741  
3.721  
3.602  
3.582  
3.405  
3.225  
2.166  
2.156  
2.040  
2.030

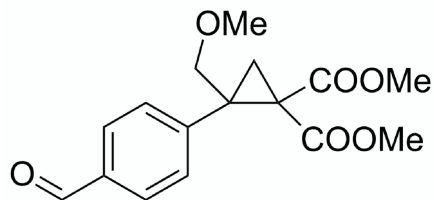

**1m**

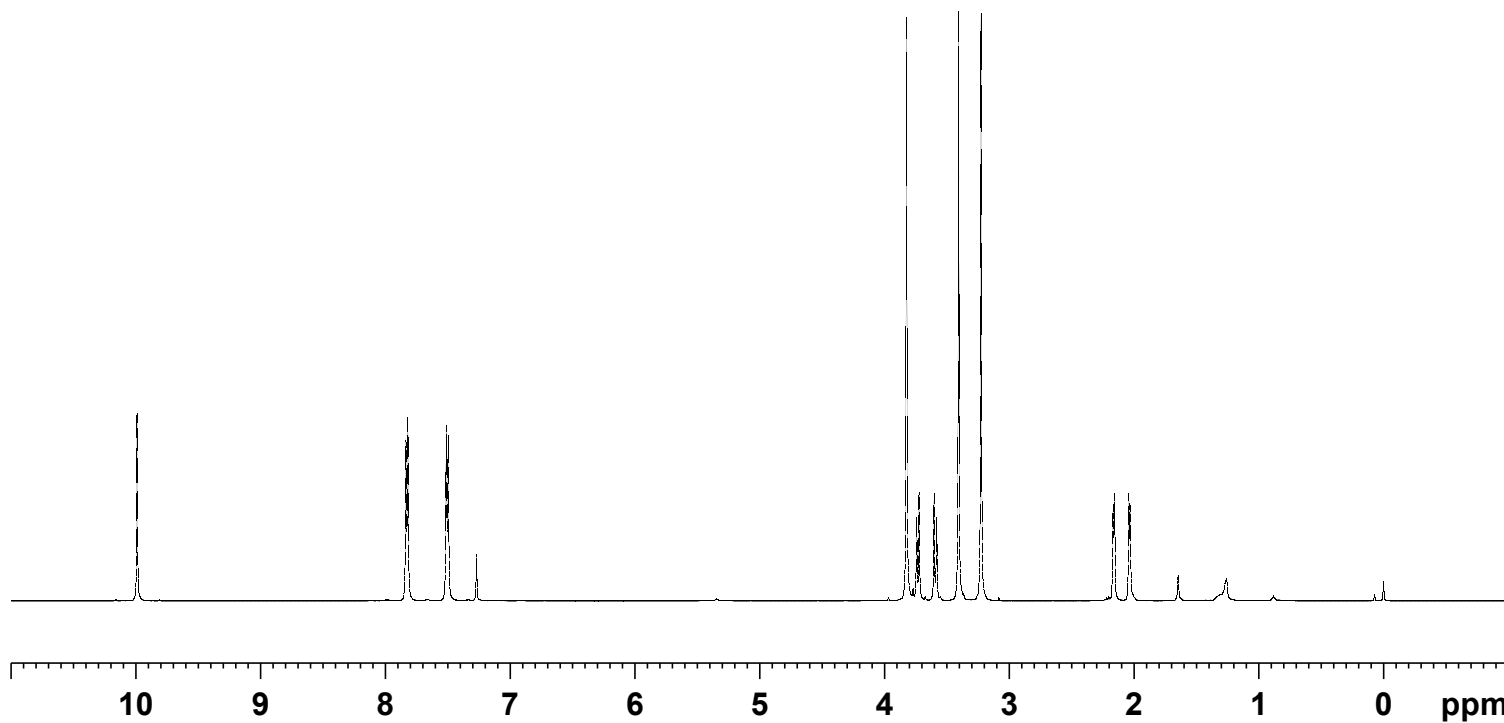

1.00

2.00  
2.00

3.06  
1.13  
1.06  
3.03  
3.06

1.11  
1.09

Current Data Parameters  
 NAME 500M-2020xia  
 EXPNO 206  
 PROCNO 1

F2 - Acquisition Parameters  
 Date\_ 20211214  
 Time 9.23  
 INSTRUM spect  
 PROBHD 5 mm CPPBBO BB  
 PULPROG zg30  
 TD 65536  
 SOLVENT CDCl3  
 NS 16  
 DS 2  
 SWH 10000.000 Hz  
 FIDRES 0.152588 Hz  
 AQ 3.2767999 sec  
 RG 31.72  
 DW 50.000 usec  
 DE 6.50 usec  
 TE 298.1 K  
 D1 1.00000000 sec  
 D11 0 sec  
 TD0 1

==== CHANNEL f1 =====  
 SFO1 500.1330885 MHz  
 NUC1 1H  
 P1 11.25 usec  
 PLW1 20.00000000 W

==== CHANNEL f2 =====  
 SFO2 500.1330885 MHz  
 NUC2 off  
 CPDPRG[2]  
 PCPD2 0 usec  
 PLW2 0 W  
 PLW12 0 W  
 PLW13 0 W

F2 - Processing parameters  
 SI 65536  
 SF 500.1300049 MHz  
 WDW EM  
 SSB 0  
 LB 0.30 Hz  
 GB 0  
 PC 1.00

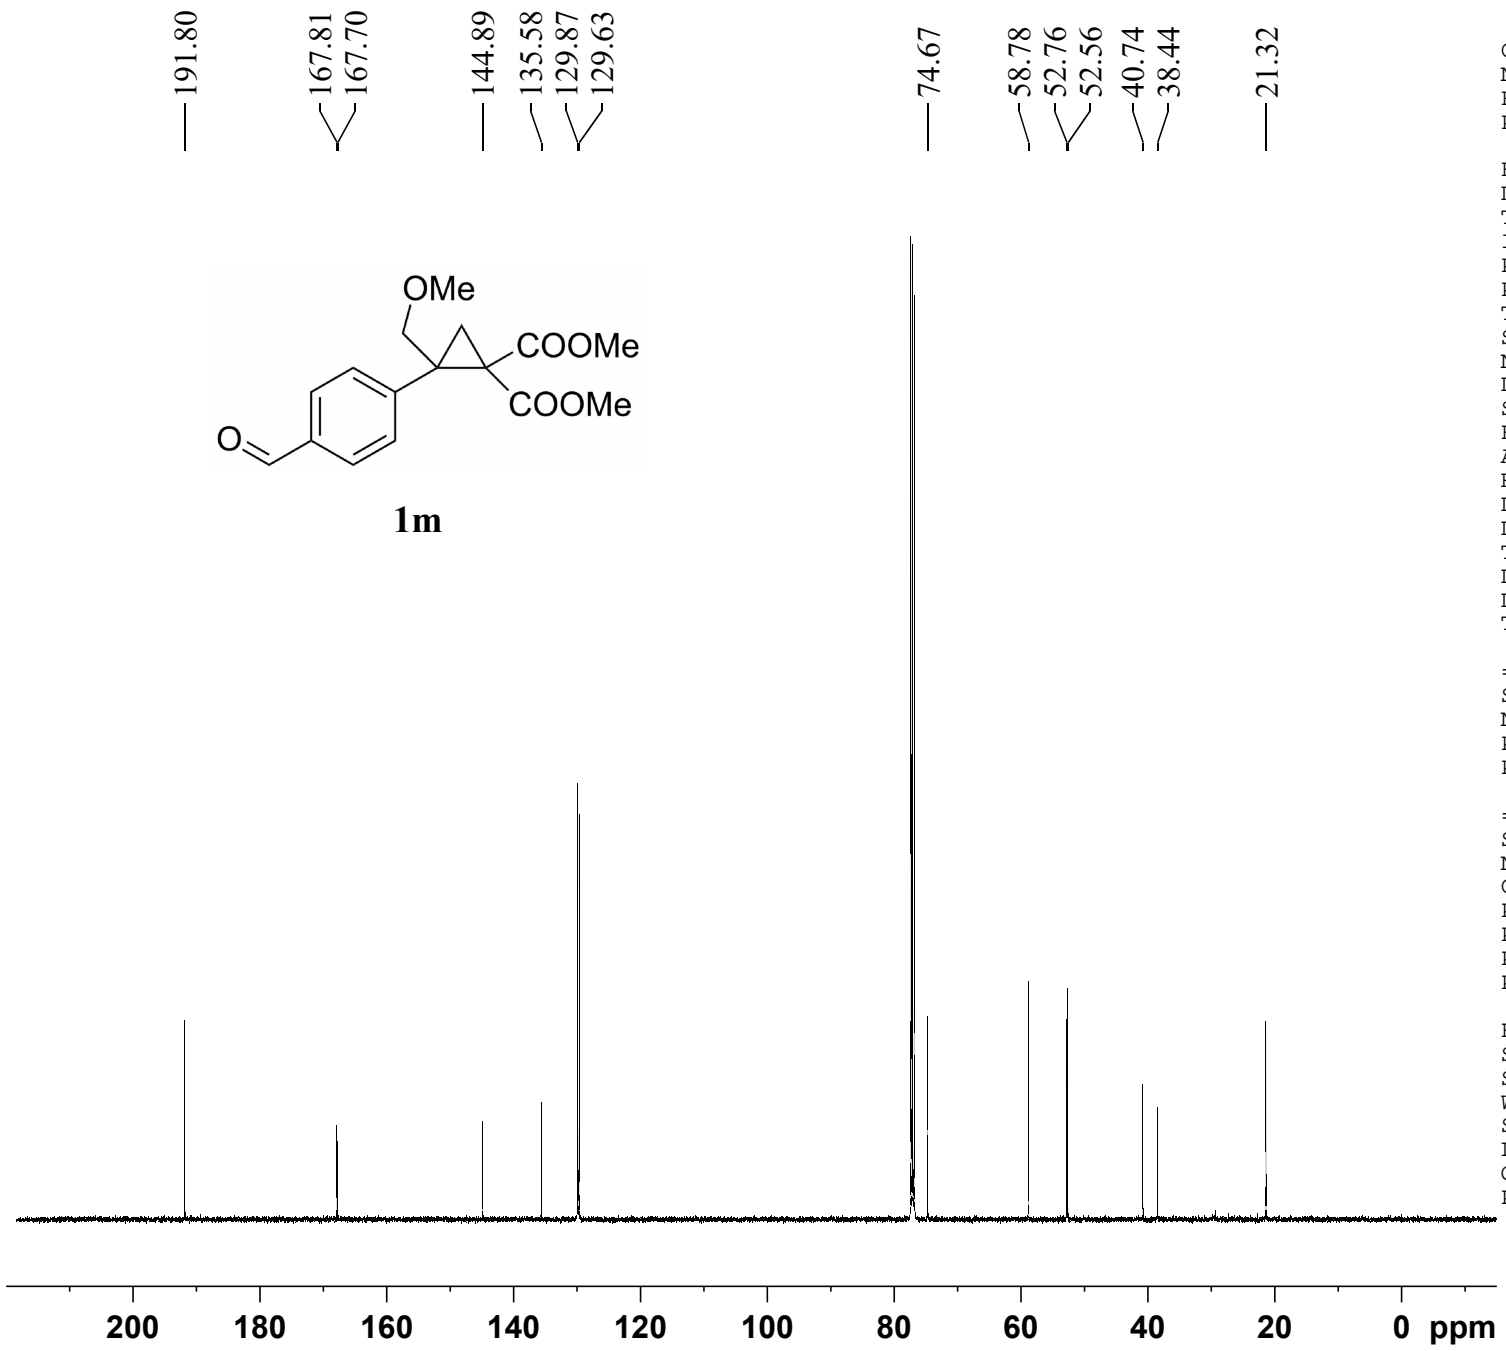

Current Data Parameters  
 NAME 500M-2020xia  
 EXPNO 207  
 PROCNO 1

F2 - Acquisition Parameters  
 Date\_ 20211214  
 Time 9.30  
 INSTRUM spect  
 PROBHD 5 mm CPPBBO BB  
 PULPROG zgpg30  
 TD 65536  
 SOLVENT CDC13  
 NS 133  
 DS 4  
 SWH 29761.904 Hz  
 FIDRES 0.454131 Hz  
 AQ 1.1010048 sec  
 RG 192.89  
 DW 16.800 usec  
 DE 18.00 usec  
 TE 298.2 K  
 D1 2.00000000 sec  
 D11 0.03000000 sec  
 TD0 1

==== CHANNEL f1 =====  
 SFO1 125.7703637 MHz  
 NUC1 13C  
 P1 10.50 usec  
 PLW1 57.00000000 W

==== CHANNEL f2 =====  
 SFO2 500.1320005 MHz  
 NUC2 1H  
 CPDPRG[2] waltz16  
 PCPD2 80.00 usec  
 PLW2 20.00000000 W  
 PLW12 0.39550999 W  
 PLW13 0.25312999 W

F2 - Processing parameters  
 SI 32768  
 SF 125.7577885 MHz  
 WDW EM  
 SSB 0  
 LB 1.00 Hz  
 GB 0  
 PC 1.40

— 9.971

7.797  
7.781  
7.374  
7.358

3.818  
3.807  
3.407  
3.106  
3.090  
2.635  
2.622  
2.607  
2.594  
2.581  
1.303  
1.291

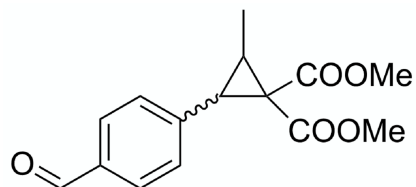

**1n**

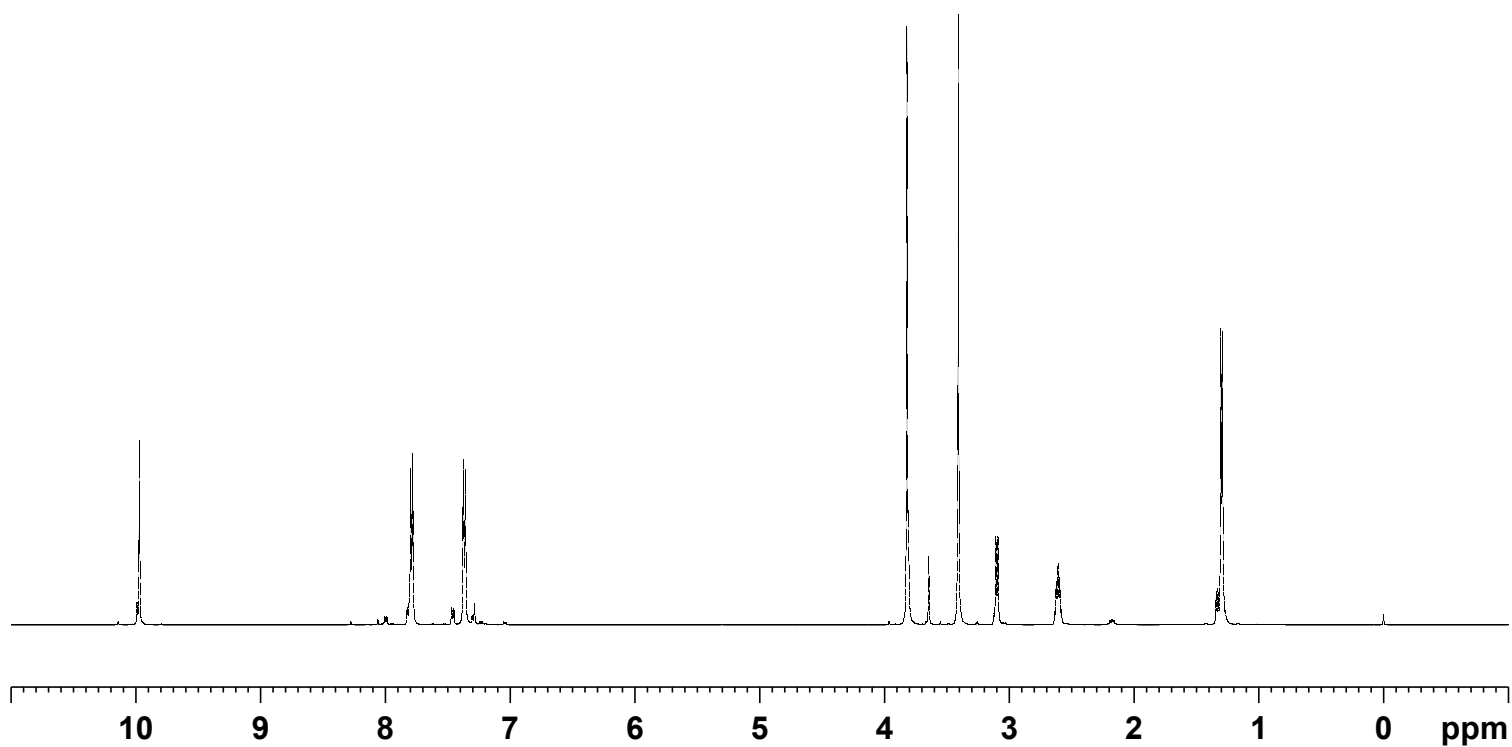

1.07

2.17  
0.23  
2.00

3.58  
3.16  
1.16  
1.08

3.66

Current Data Parameters  
 NAME 500M-2020xia  
 EXPNO 202  
 PROCNO 1

F2 - Acquisition Parameters  
 Date\_ 20211214  
 Time 4.33  
 INSTRUM spect  
 PROBHD 5 mm CPPBBO BB  
 PULPROG zg30  
 TD 65536  
 SOLVENT CDCl3  
 NS 16  
 DS 2  
 SWH 10000.000 Hz  
 FIDRES 0.152588 Hz  
 AQ 3.2767999 sec  
 RG 31.72  
 DW 50.000 usec  
 DE 6.50 usec  
 TE 298.2 K  
 D1 1.00000000 sec  
 D11 0 sec  
 TD0 1

==== CHANNEL f1 =====  
 SFO1 500.1330885 MHz  
 NUC1 1H  
 P1 11.25 usec  
 PLW1 20.00000000 W

==== CHANNEL f2 =====  
 SFO2 500.1330885 MHz  
 NUC2 off  
 CPDPRG[2]  
 PCPD2 0 usec  
 PLW2 0 W  
 PLW12 0 W  
 PLW13 0 W

F2 - Processing parameters  
 SI 65536  
 SF 500.1299981 MHz  
 WDW EM  
 SSB 0  
 LB 0.30 Hz  
 GB 0  
 PC 1.00

— 191.79

— 167.95  
— 167.18

— 142.42  
— 135.34  
— 129.54  
— 129.17

— 52.81  
— 52.43  
— 43.63  
— 37.59

— 25.52

— 12.49

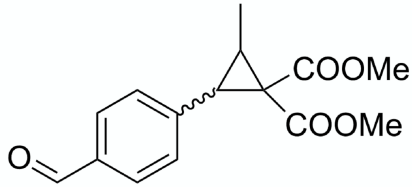

**1n**

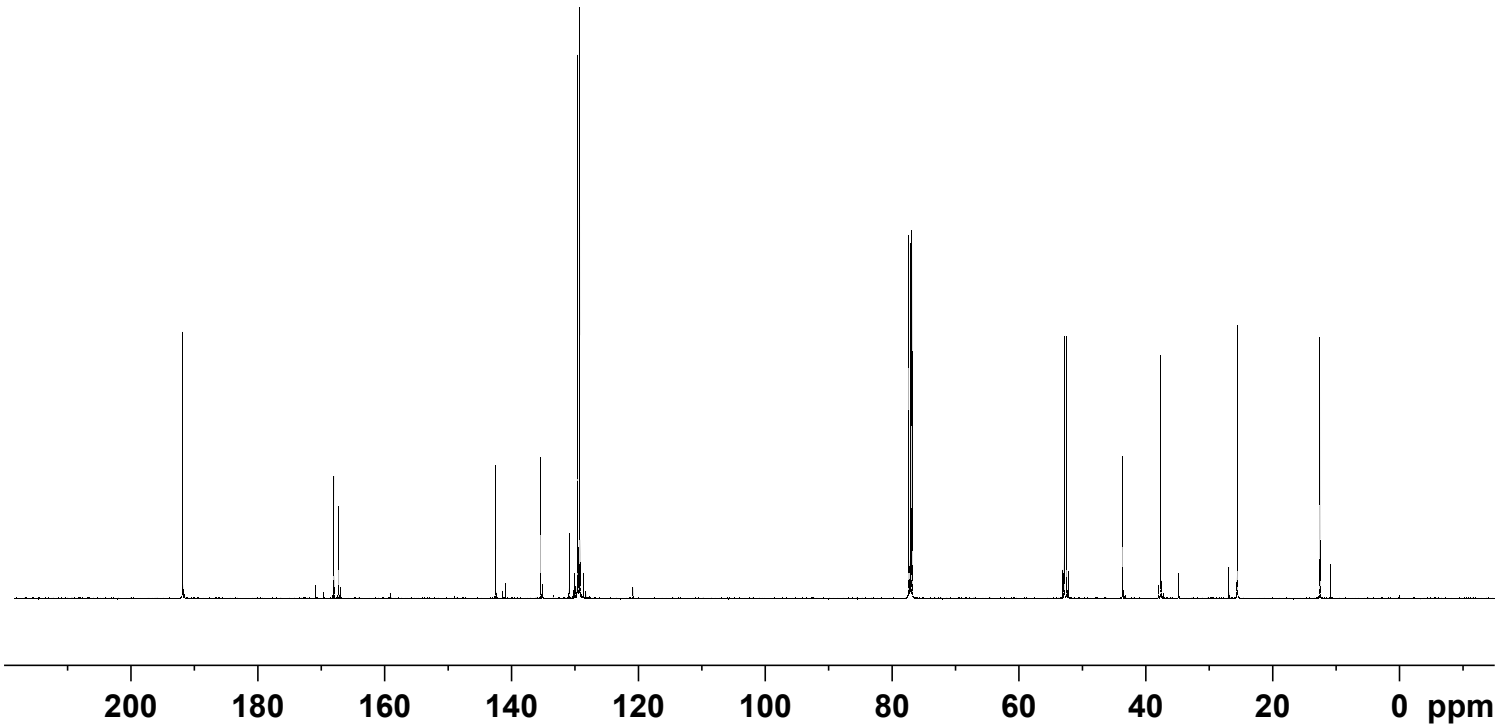

Current Data Parameters  
 NAME 500M-2020xia  
 EXPNO 203  
 PROCNO 1

F2 - Acquisition Parameters  
 Date\_ 20211214  
 Time 5.27  
 INSTRUM spect  
 PROBHD 5 mm CPPBBO BB  
 PULPROG zgpg30  
 TD 65536  
 SOLVENT CDCl3  
 NS 1024  
 DS 4  
 SWH 29761.904 Hz  
 FIDRES 0.454131 Hz  
 AQ 1.1010048 sec  
 RG 192.89  
 DW 16.800 usec  
 DE 18.00 usec  
 TE 298.2 K  
 D1 2.0000000 sec  
 D11 0.0300000 sec  
 TD0 1

==== CHANNEL f1 =====  
 SFO1 125.7703637 MHz  
 NUC1 13C  
 P1 10.50 usec  
 PLW1 57.0000000 W

==== CHANNEL f2 =====  
 SFO2 500.1320005 MHz  
 NUC2 1H  
 CPDPRG[2] waltz16  
 PCPD2 80.00 usec  
 PLW2 20.0000000 W  
 PLW12 0.39550999 W  
 PLW13 0.25312999 W

F2 - Processing parameters  
 SI 32768  
 SF 125.7577885 MHz  
 WDW EM  
 SSB 0  
 LB 1.00 Hz  
 GB 0  
 PC 1.40



9.967  
 7.854  
 7.848  
 7.843  
 7.837  
 7.792  
 7.776  
 7.729  
 7.723  
 7.718  
 7.712  
 7.379  
 7.363  
 3.804  
 3.779  
 3.765  
 3.761  
 3.750  
 3.736  
 3.734  
 3.394  
 3.151  
 3.135  
 2.650  
 2.635  
 2.620  
 2.605  
 1.903  
 1.885  
 1.871  
 1.858  
 1.846  
 1.643  
 1.627  
 1.613  
 1.598

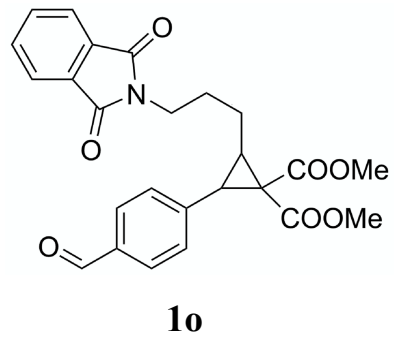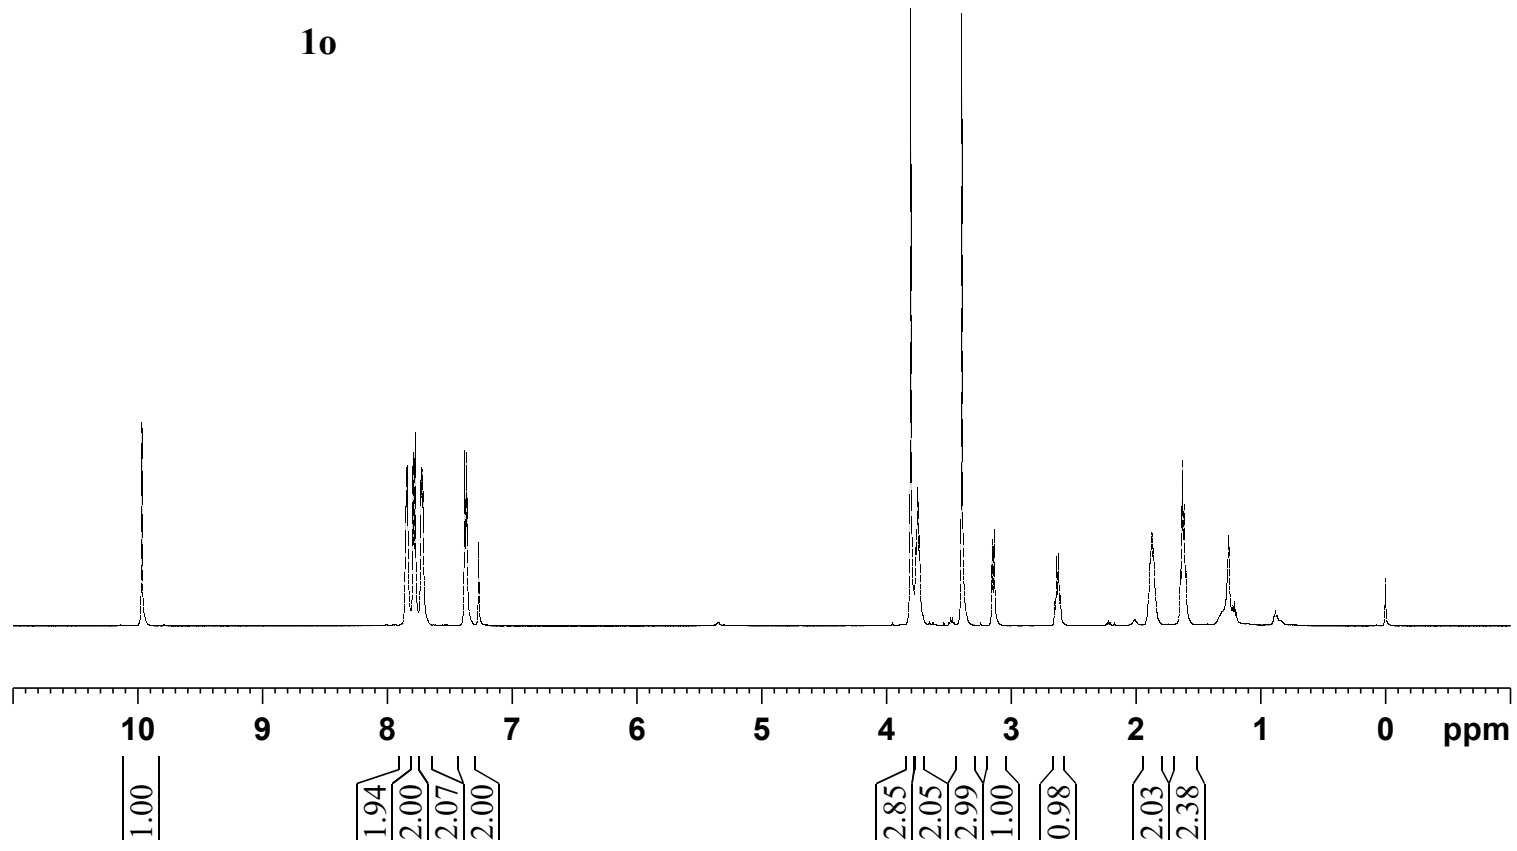

Current Data Parameters  
 NAME 500M-2020xia  
 EXPNO 214  
 PROCNO 1

F2 - Acquisition Parameters  
 Date\_ 20211228  
 Time 15.25  
 INSTRUM spect  
 PROBHD 5 mm CPPBBO BB  
 PULPROG zg30  
 TD 65536  
 SOLVENT CDCl3  
 NS 16  
 DS 2  
 SWH 10000.000 Hz  
 FIDRES 0.152588 Hz  
 AQ 3.2767999 sec  
 RG 69.95  
 DW 50.000 usec  
 DE 6.50 usec  
 TE 298.2 K  
 D1 1.00000000 sec  
 D11 0 sec  
 TD0 1

==== CHANNEL f1 =====  
 SFO1 500.1330885 MHz  
 NUC1 1H  
 P1 11.25 usec  
 PLW1 20.00000000 W

==== CHANNEL f2 =====  
 SFO2 500.1330885 MHz  
 NUC2 off  
 CPDPRG[2]  
 PCPD2 0 usec  
 PLW2 0 W  
 PLW12 0 W  
 PLW13 0 W

F2 - Processing parameters  
 SI 65536  
 SF 500.1300037 MHz  
 WDW EM  
 SSB 0  
 LB 0.30 Hz  
 GB 0  
 PC 1.00

191.77  
 168.33  
 167.93  
 166.98  
 142.13  
 135.42  
 133.99  
 132.07  
 129.61  
 129.21  
 123.24

52.95  
 52.49  
 43.12  
 37.36  
 36.77  
 30.49  
 27.81  
 24.81

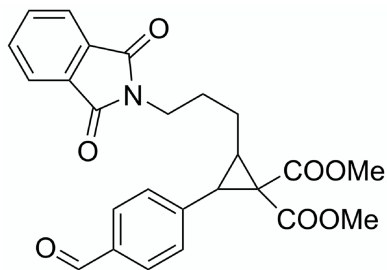

**10**

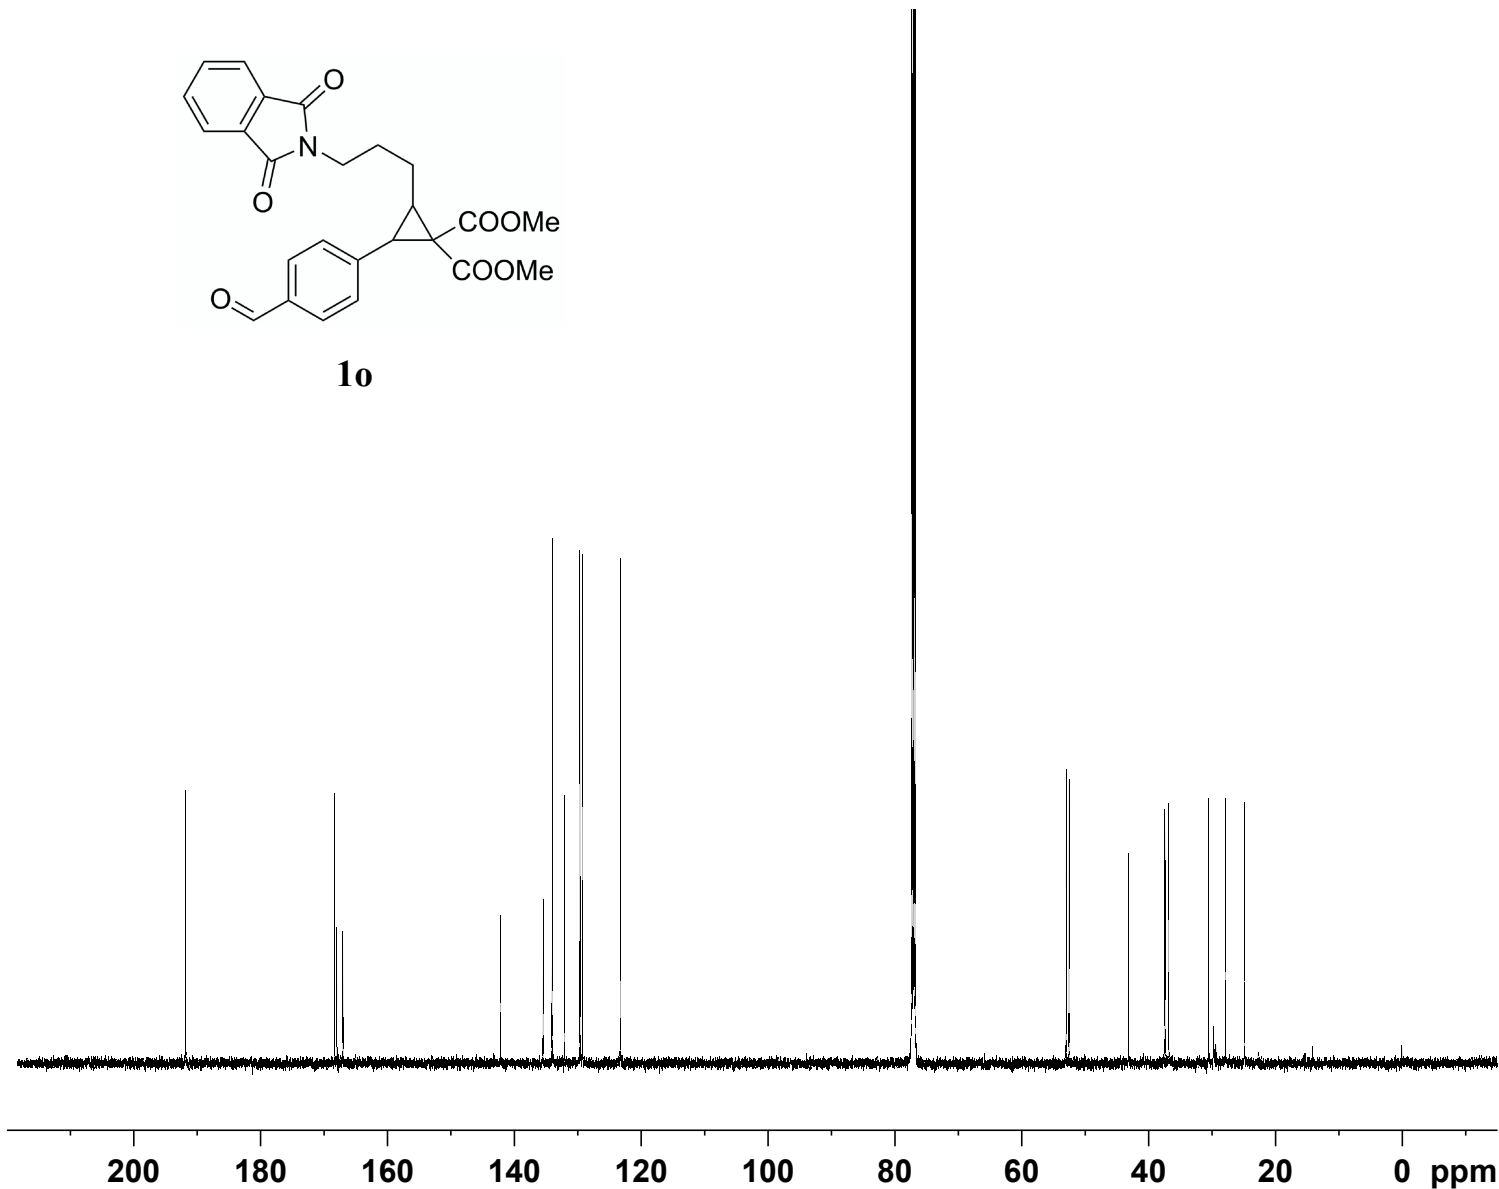

Current Data Parameters  
 NAME 500M-2020xia  
 EXPNO 215  
 PROCNO 1

F2 - Acquisition Parameters  
 Date\_ 20211228  
 Time 15.52  
 INSTRUM spect  
 PROBHD 5 mm CPPBBO BB  
 PULPROG zgpg30  
 TD 65536  
 SOLVENT CDC13  
 NS 512  
 DS 4  
 SWH 29761.904 Hz  
 FIDRES 0.454131 Hz  
 AQ 1.1010048 sec  
 RG 192.89  
 DW 16.800 usec  
 DE 18.00 usec  
 TE 298.2 K  
 D1 2.00000000 sec  
 D11 0.03000000 sec  
 TD0 1

==== CHANNEL f1 =====  
 SFO1 125.7703637 MHz  
 NUC1 13C  
 P1 10.50 usec  
 PLW1 57.00000000 W

==== CHANNEL f2 =====  
 SFO2 500.1320005 MHz  
 NUC2 1H  
 CPDPRG[2] waltz16  
 PCPD2 80.00 usec  
 PLW2 20.00000000 W  
 PLW12 0.39550999 W  
 PLW13 0.25312999 W

F2 - Processing parameters  
 SI 32768  
 SF 125.7577885 MHz  
 WDW EM  
 SSB 0  
 LB 1.00 Hz  
 GB 0  
 PC 1.40

9.986  
 8.006  
 7.990  
 7.836  
 7.820  
 7.795  
 7.781  
 7.766  
 7.489  
 7.473

3.489  
 3.472  
 3.454  
 2.522  
 2.514  
 2.505  
 2.496  
 2.363  
 2.354  
 2.345  
 2.336

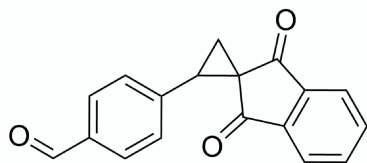

**1p**

Current Data Parameters  
 NAME qy-538-new  
 EXPNO 1  
 PROCNO 1

F2 - Processing parameters  
 SI 65536  
 SF 500.1300063 MHz  
 WDW EM  
 SSB 0  
 LB 0.30 Hz  
 GB 0  
 PC 1.00

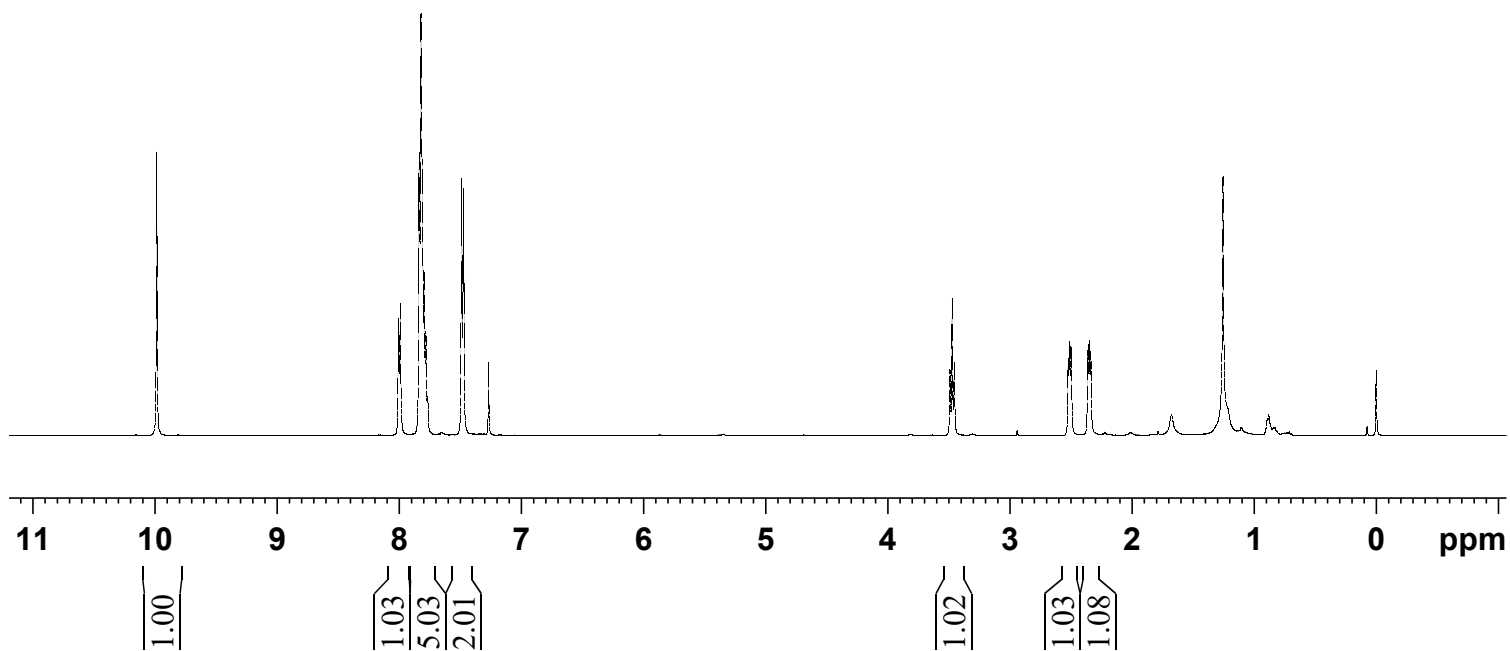

197.57  
195.62  
191.72

142.54  
141.58  
140.68  
135.69  
135.14  
134.97  
129.92  
129.49  
122.68  
122.65

42.48  
39.89

22.16

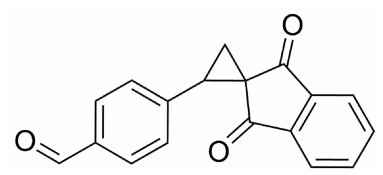

1p

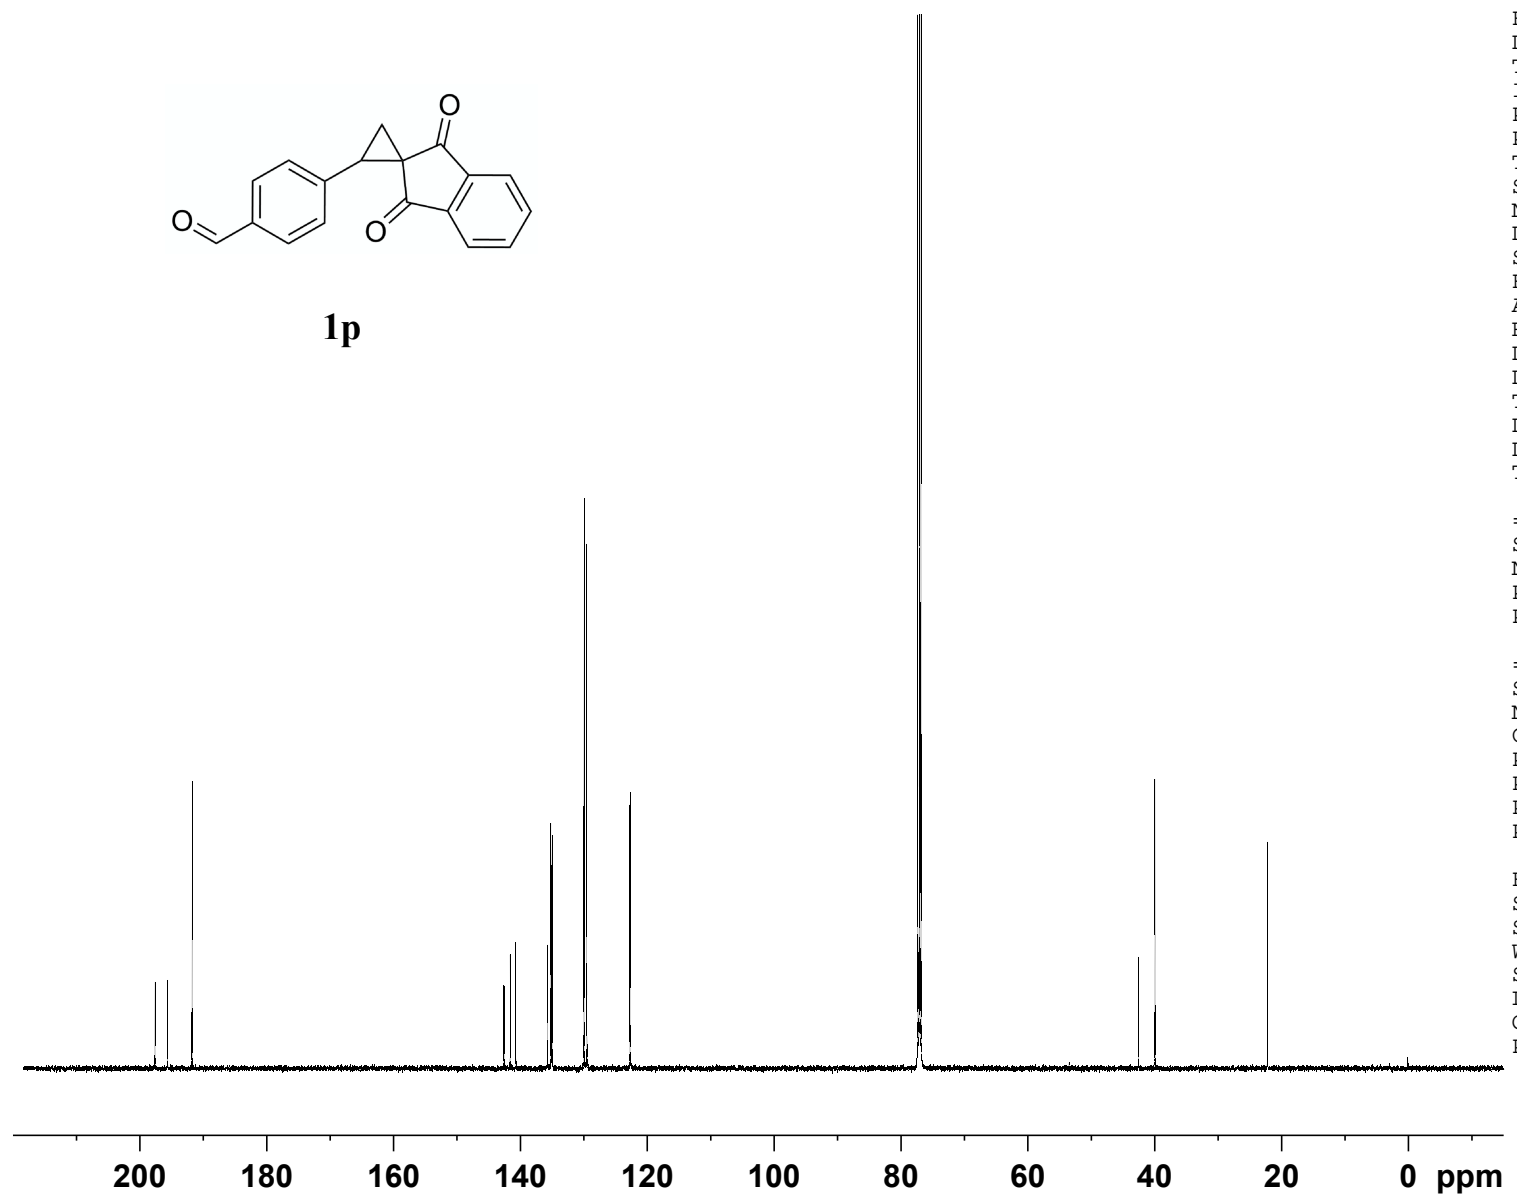

Current Data Parameters  
NAME 500M-2022  
EXPNO 105  
PROCNO 1

F2 - Acquisition Parameters  
Date\_ 20220613  
Time 22.40  
INSTRUM spect  
PROBHD 5 mm CPPBBO BB  
PULPROG zgpg30  
TD 65536  
SOLVENT CDCl3  
NS 256  
DS 4  
SWH 29761.904 Hz  
FIDRES 0.454131 Hz  
AQ 1.1010048 sec  
RG 192.89  
DW 16.800 usec  
DE 18.00 usec  
TE 298.2 K  
D1 2.00000000 sec  
D11 0.03000000 sec  
TD0 1

==== CHANNEL f1 =====  
SFO1 125.7703637 MHz  
NUC1 13C  
P1 10.50 usec  
PLW1 57.00000000 W

==== CHANNEL f2 =====  
SFO2 500.1320005 MHz  
NUC2 1H  
CPDPRG[2] waltz16  
PCPD2 80.00 usec  
PLW2 20.00000000 W  
PLW12 0.39550999 W  
PLW13 0.25312999 W

F2 - Processing parameters  
SI 32768  
SF 125.7577885 MHz  
WDW EM  
SSB 0  
LB 1.00 Hz  
GB 0  
PC 1.40

9.986  
9.973

7.811  
7.809  
7.795  
7.793  
7.365  
7.349  
7.308  
7.292  
7.272

3.835  
3.385  
3.363  
3.346  
3.330  
3.318  
2.463  
2.391  
2.380  
2.375  
2.365  
2.290  
2.281  
2.275  
2.265  
1.973  
1.786  
1.784  
1.777  
1.769  
1.760

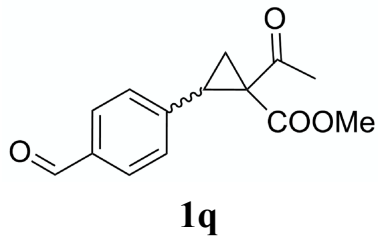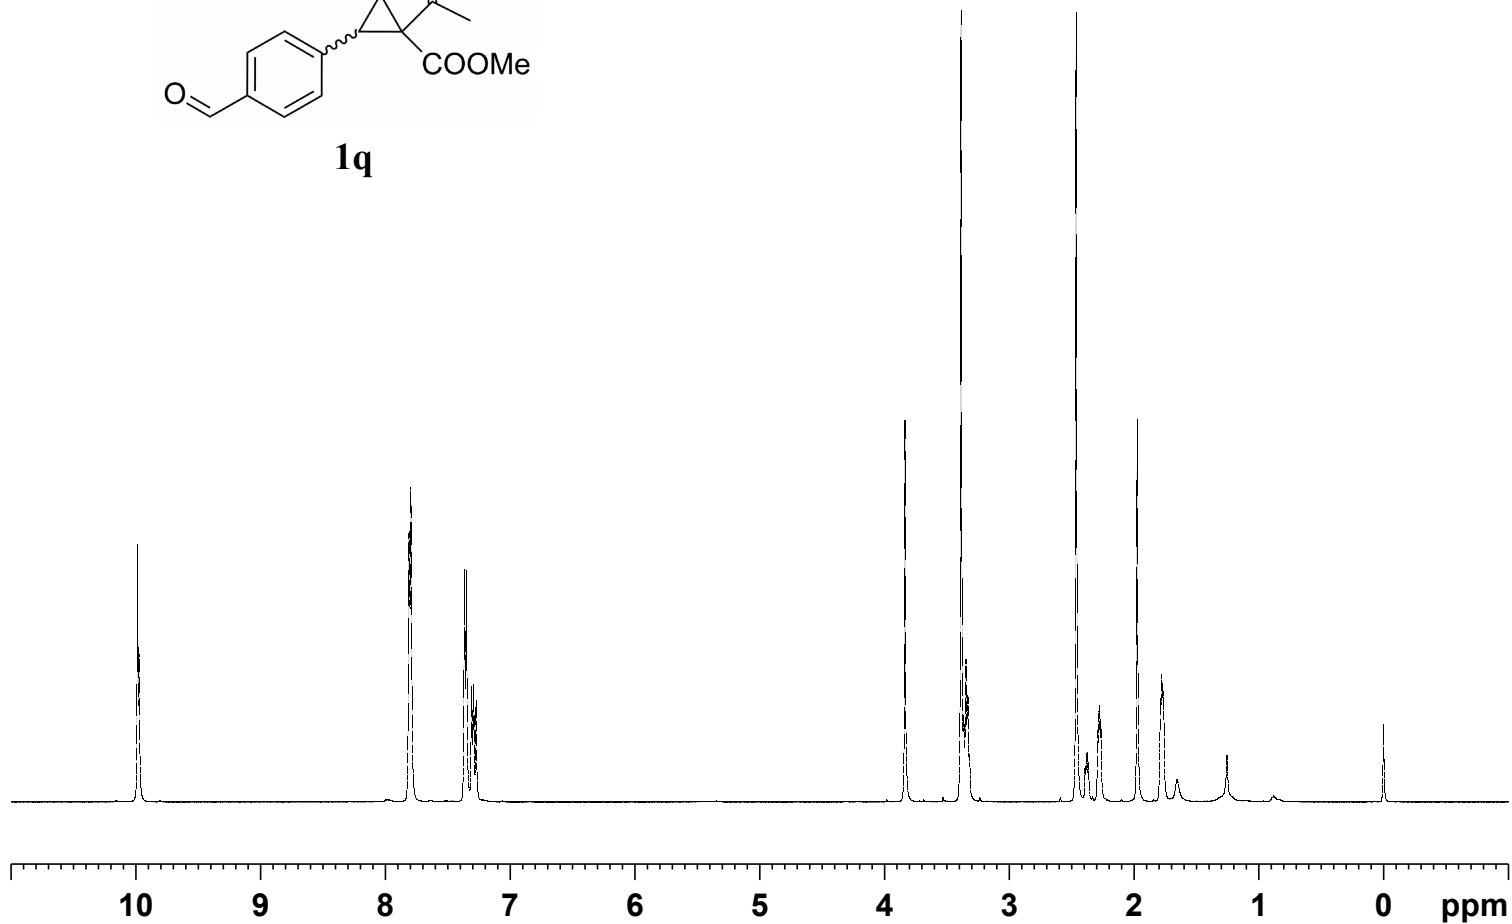

Current Data Parameters  
NAME 500M-2020xia  
EXPNO 169  
PROCNO 1

F2 - Acquisition Parameters  
Date\_ 20211120  
Time 10.58  
INSTRUM spect  
PROBHD 5 mm CPPBBO BB  
PULPROG zg30  
TD 65536  
SOLVENT CDCl3  
NS 16  
DS 2  
SWH 10000.000 Hz  
FIDRES 0.152588 Hz  
AQ 3.2767999 sec  
RG 31.72  
DW 50.000 usec  
DE 6.50 usec  
TE 0 K  
D1 1.00000000 sec  
D11 0 sec  
TD0 1

==== CHANNEL f1 =====  
SFO1 500.1330885 MHz  
NUC1 1H  
P1 10.59 usec  
PLW1 20.00000000 W

==== CHANNEL f2 =====  
SFO2 500.1330885 MHz  
NUC2 off  
CPDPRG[2]  
PCPD2 0 usec  
PLW2 0 W  
PLW12 0 W  
PLW13 0 W

F2 - Processing parameters  
SI 65536  
SF 500.1300044 MHz  
WDW EM  
SSB 0  
LB 0.30 Hz  
GB 0  
PC 1.00

201.61  
199.33  
191.80  
191.69  
170.52  
168.26  
142.12  
141.00  
135.49  
135.42  
129.70  
129.53  
129.38  
129.10

77.34  
77.09  
76.84  
52.84  
52.21  
44.80  
44.60  
34.54  
34.31  
30.31  
29.70  
29.55  
21.67  
18.30  
0.01

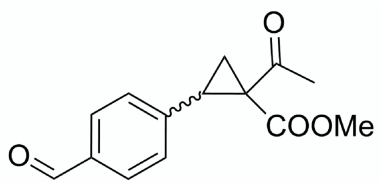

1q

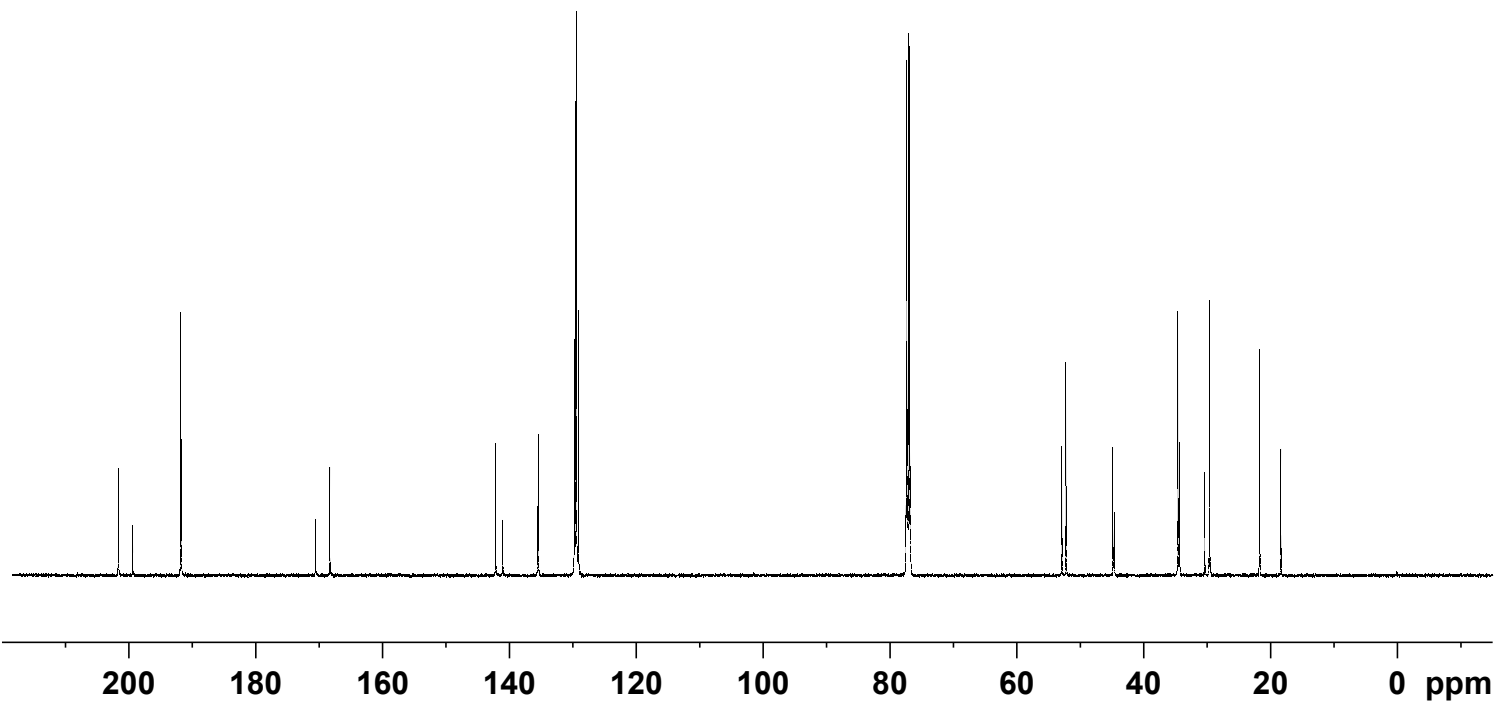

Current Data Parameters  
NAME 500M-2020xia  
EXPNO 150  
PROCNO 1

F2 - Acquisition Parameters  
Date\_ 20211120  
Time 5.25  
INSTRUM spect  
PROBHD 5 mm CPPBBO BB  
PULPROG zgpg30  
TD 65536  
SOLVENT CDC13  
NS 512  
DS 4  
SWH 29761.904 Hz  
FIDRES 0.454131 Hz  
AQ 1.1010048 sec  
RG 192.89  
DW 16.800 usec  
DE 18.00 usec  
TE 0 K  
D1 2.0000000 sec  
D11 0.0300000 sec  
TD0 1

==== CHANNEL f1 =====  
SFO1 125.7703637 MHz  
NUC1 13C  
P1 9.80 usec  
PLW1 57.0000000 W

==== CHANNEL f2 =====  
SFO2 500.132005 MHz  
NUC2 1H  
CPDPRG[2] waltz16  
PCPD2 80.00 usec  
PLW2 20.0000000 W  
PLW12 0.35778001 W  
PLW13 0.22898000 W

F2 - Processing parameters  
SI 32768  
SF 125.7577885 MHz  
WDW EM  
SSB 0  
LB 1.00 Hz  
GB 0  
PC 1.40

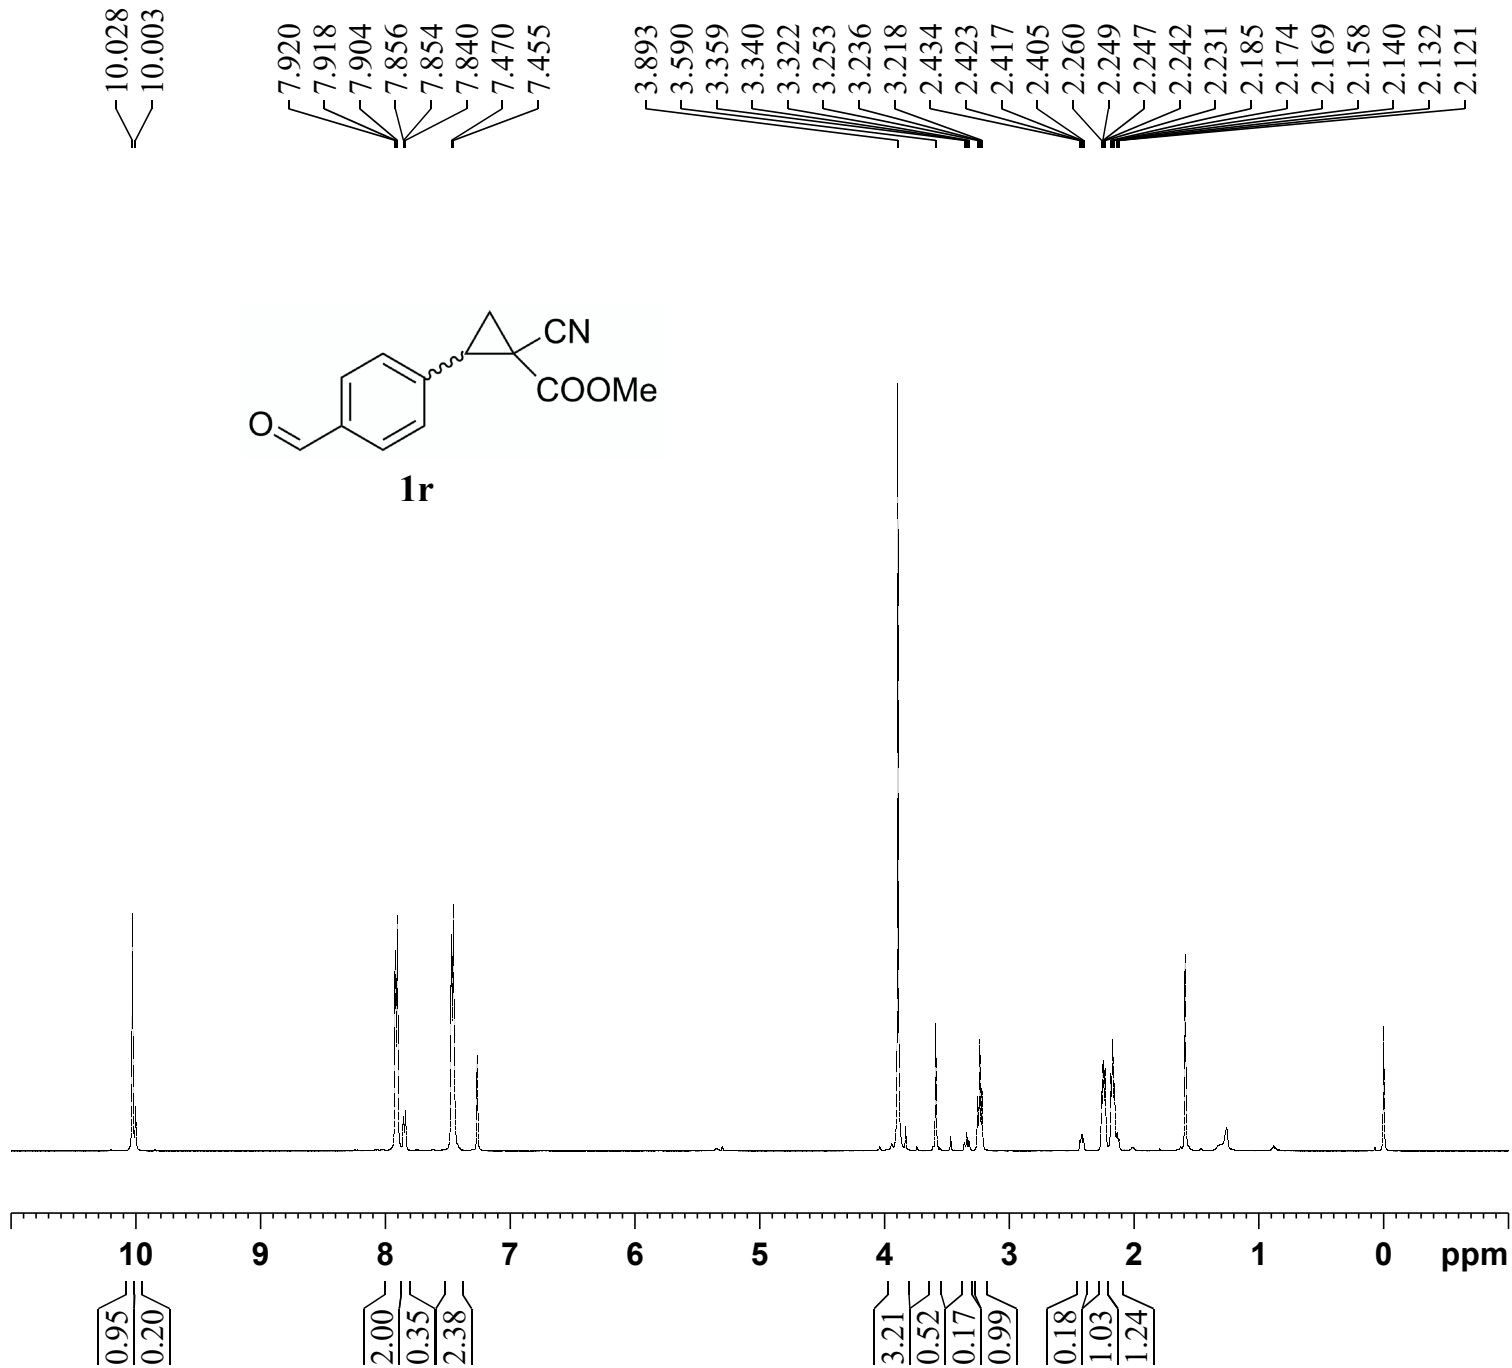

Current Data Parameters  
 NAME 500M-2020xia  
 EXPNO 131  
 PROCNO 1

F2 - Acquisition Parameters  
 Date\_ 20211101  
 Time 9.53  
 INSTRUM spect  
 PROBHD 5 mm CPPBBO BB  
 PULPROG zg30  
 TD 65536  
 SOLVENT CDCl3  
 NS 16  
 DS 2  
 SWH 10000.000 Hz  
 FIDRES 0.152588 Hz  
 AQ 3.2767999 sec  
 RG 55.37  
 DW 50.000 usec  
 DE 6.50 usec  
 TE 298.2 K  
 D1 1.00000000 sec  
 D11 0 sec  
 TD0 1

==== CHANNEL f1 =====  
 SFO1 500.1330885 MHz  
 NUC1 1H  
 P1 10.59 usec  
 PLW1 20.00000000 W

==== CHANNEL f2 =====  
 SFO2 500.1330885 MHz  
 NUC2 off  
 CPDPRG[2]  
 PCPD2 0 usec  
 PLW2 0 W  
 PLW12 0 W  
 PLW13 0 W

F2 - Processing parameters  
 SI 65536  
 SF 500.1300091 MHz  
 WDW EM  
 SSB 0  
 LB 0.30 Hz  
 GB 0  
 PC 1.00

191.52  
191.48  
167.37  
164.44  
139.54  
138.67  
136.36  
136.17  
130.03  
129.68  
118.41  
115.82

53.95  
53.52  
36.09  
34.86  
23.01  
22.95  
21.03  
20.50

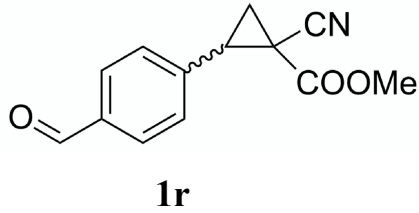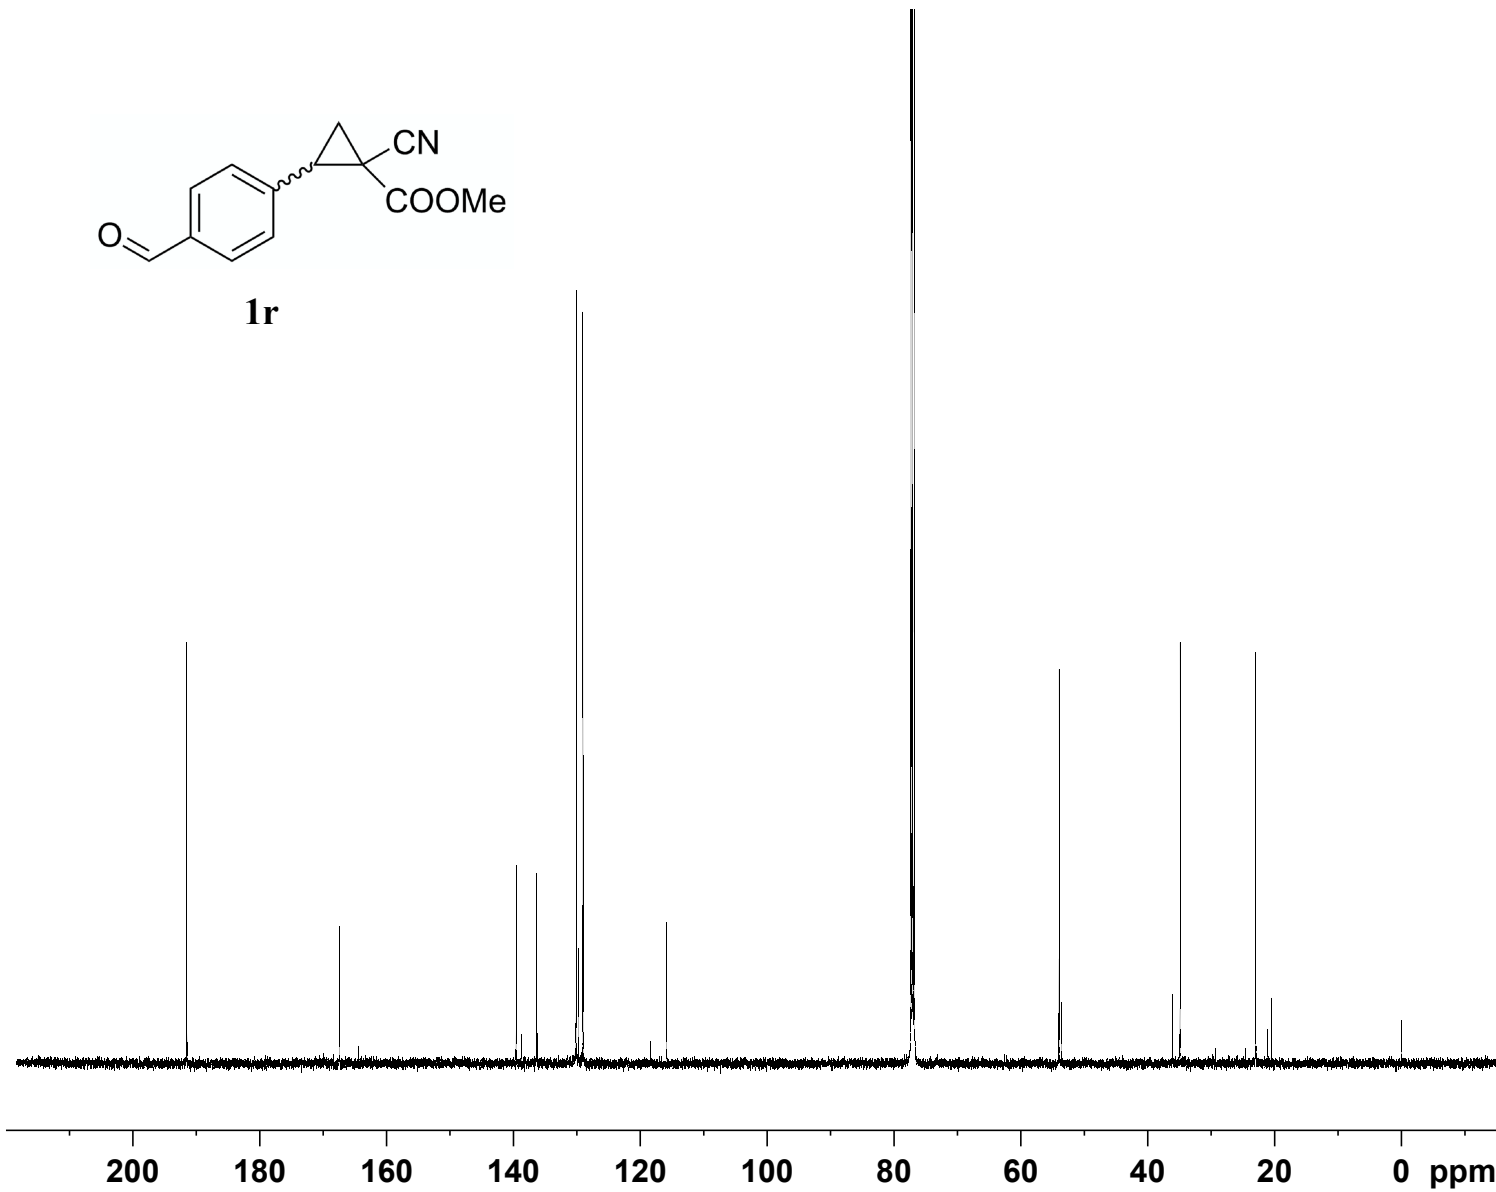

Current Data Parameters  
NAME 500M-2020xia  
EXPNO 135  
PROCNO 1

F2 - Acquisition Parameters  
Date\_ 20211102  
Time 9.54  
INSTRUM spect  
PROBHD 5 mm CPPBBO BB  
PULPROG zgpg30  
TD 65536  
SOLVENT CDCl3  
NS 512  
DS 4  
SWH 29761.904 Hz  
FIDRES 0.454131 Hz  
AQ 1.1010048 sec  
RG 192.89  
DW 16.800 usec  
DE 18.00 usec  
TE 298.2 K  
D1 2.00000000 sec  
D11 0.03000000 sec  
TD0 1

==== CHANNEL f1 =====  
SFO1 125.7703637 MHz  
NUC1 13C  
P1 9.80 usec  
PLW1 57.00000000 W

==== CHANNEL f2 =====  
SFO2 500.1320005 MHz  
NUC2 1H  
CPDPRG[2] waltz16  
PCPD2 80.00 usec  
PLW2 20.00000000 W  
PLW12 0.35778001 W  
PLW13 0.22898000 W

F2 - Processing parameters  
SI 32768  
SF 125.7577890 MHz  
WDW EM  
SSB 0  
LB 1.00 Hz  
GB 0  
PC 1.40



— 10.047

7.962  
7.946  
7.497  
7.481

3.380  
3.363  
3.345  
2.348  
2.330

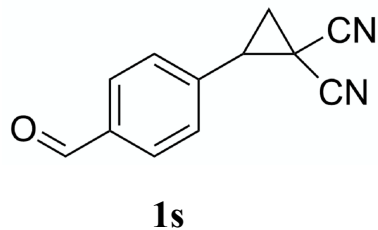

Current Data Parameters  
NAME 500M-2020xia  
EXPNO 137  
PROCNO 1

F2 - Acquisition Parameters  
Date\_ 20211113  
Time 0.57  
INSTRUM spect  
PROBHD 5 mm CPPBBO BB  
PULPROG zg30  
TD 65536  
SOLVENT CDCl3  
NS 16  
DS 2  
SWH 10000.000 Hz  
FIDRES 0.152588 Hz  
AQ 3.2767999 sec  
RG 62.06  
DW 50.000 usec  
DE 6.50 usec  
TE 298.2 K  
D1 1.00000000 sec  
D11 0 sec  
TD0 1

==== CHANNEL f1 =====  
SFO1 500.1330885 MHz  
NUC1 1H  
P1 10.59 usec  
PLW1 20.00000000 W

==== CHANNEL f2 =====  
SFO2 500.1330885 MHz  
NUC2 off  
CPDPRG[2]  
PCPD2 0 usec  
PLW2 0 W  
PLW12 0 W  
PLW13 0 W

F2 - Processing parameters  
SI 65536  
SF 500.1300088 MHz  
WDW EM  
SSB 0  
LB 0.30 Hz  
GB 0  
PC 1.00

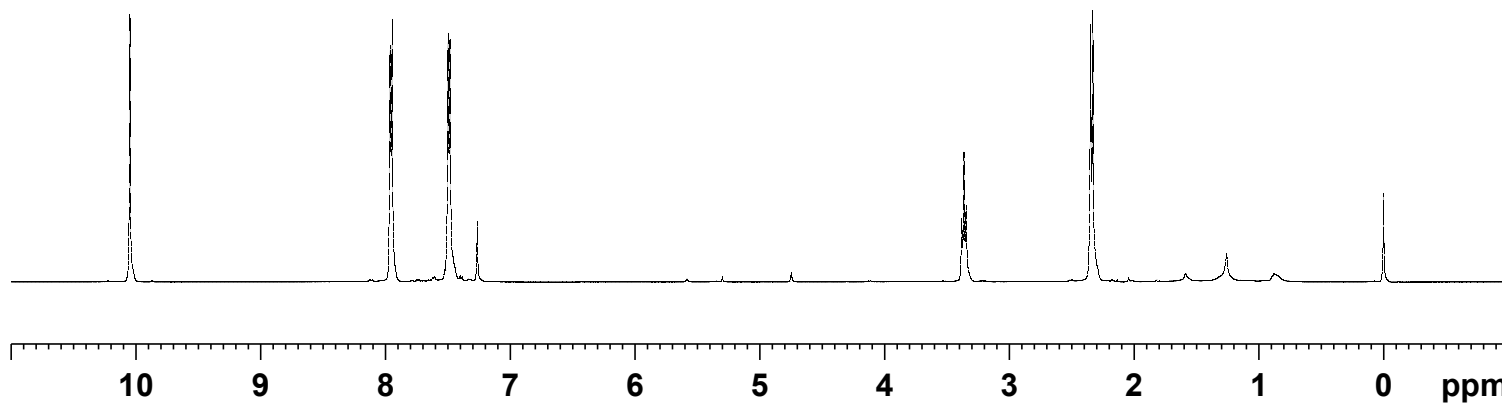

0.98

2.00

2.25

1.07

2.24

—191.21  
 —136.99  
 —136.95  
 —130.29  
 —129.11  
 —114.76  
 —112.57

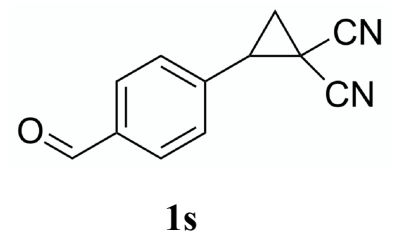

—34.55  
 —22.46  
 —7.57

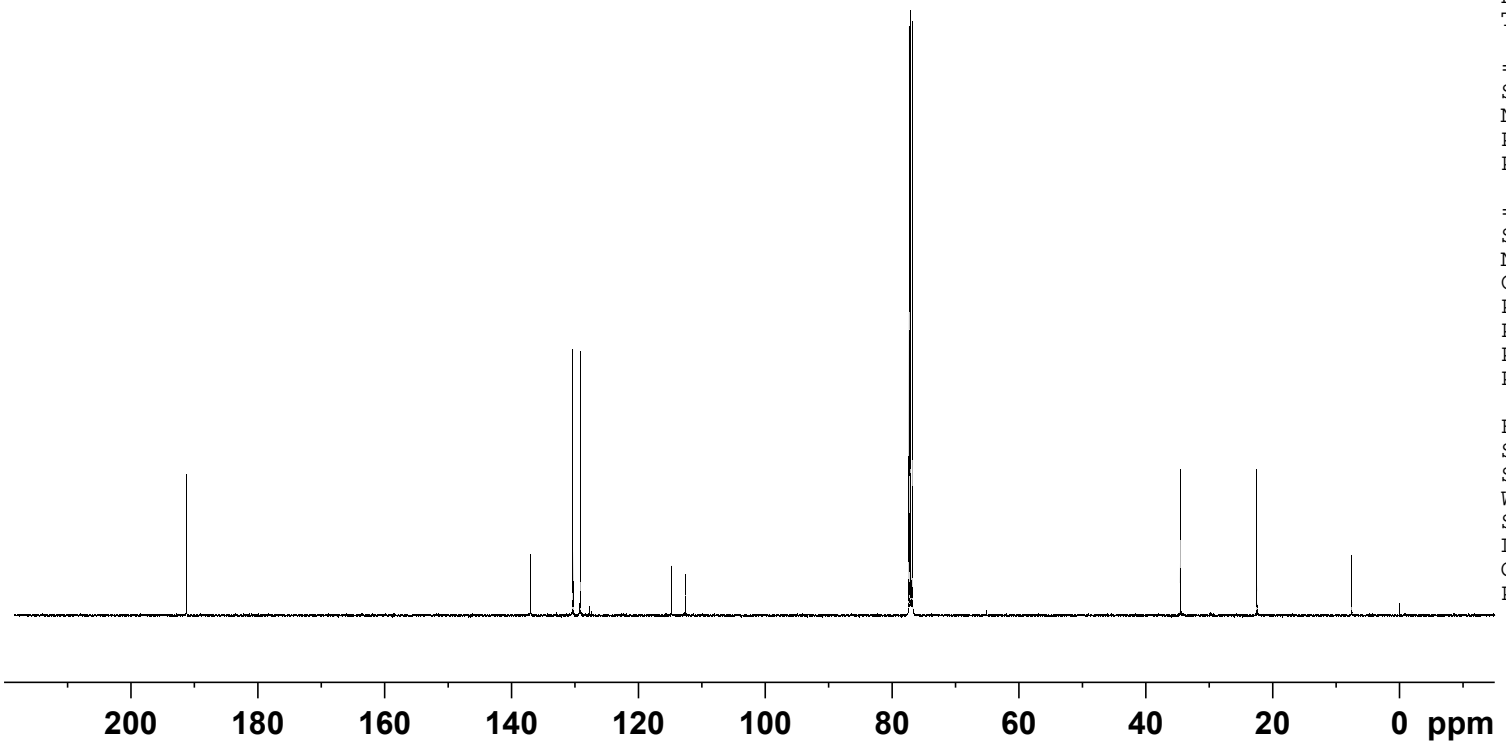

Current Data Parameters  
 NAME 500M-2020xia  
 EXPNO 138  
 PROCNO 1

F2 - Acquisition Parameters  
 Date\_ 20211113  
 Time 1.24  
 INSTRUM spect  
 PROBHD 5 mm CPPBBO BB  
 PULPROG zgpg30  
 TD 65536  
 SOLVENT CDCl3  
 NS 512  
 DS 4  
 SWH 29761.904 Hz  
 FIDRES 0.454131 Hz  
 AQ 1.1010048 sec  
 RG 192.89  
 DW 16.800 usec  
 DE 18.00 usec  
 TE 298.2 K  
 D1 2.00000000 sec  
 D11 0.03000000 sec  
 TD0 1

==== CHANNEL f1 =====  
 SFO1 125.7703637 MHz  
 NUC1 13C  
 P1 9.80 usec  
 PLW1 57.00000000 W

==== CHANNEL f2 =====  
 SFO2 500.1320005 MHz  
 NUC2 1H  
 CPDPRG[2] waltz16  
 PCPD2 80.00 usec  
 PLW2 20.00000000 W  
 PLW12 0.35778001 W  
 PLW13 0.22898000 W

F2 - Processing parameters  
 SI 32768  
 SF 125.7577898 MHz  
 WDW EM  
 SSB 0  
 LB 1.00 Hz  
 GB 0  
 PC 1.40

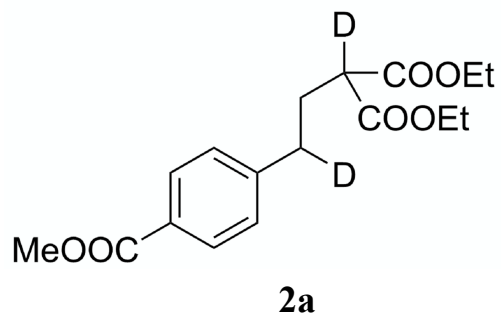

7.974  
7.953  
7.270  
7.249

4.231  
4.227  
4.213  
4.209  
4.195  
4.192  
4.177  
4.174  
3.903  
3.342  
3.323  
3.304  
2.740  
2.722  
2.702  
2.684  
2.242  
2.224  
2.205  
1.291  
1.273  
1.255

Current Data Parameters  
 NAME 400M-2022  
 EXPNO 3  
 PROCNO 1

F2 - Acquisition Parameters  
 Date\_ 20220701  
 Time 3.55  
 INSTRUM spect  
 PROBHD 5 mm PABBO BB/  
 PULPROG zg30  
 TD 32768  
 SOLVENT CDCl3  
 NS 16  
 DS 0  
 SWH 8012.820 Hz  
 FIDRES 0.244532 Hz  
 AQ 2.0447233 sec  
 RG 92.09  
 DW 62.400 usec  
 DE 6.50 usec  
 TE 300.7 K  
 D1 2.00000000 sec  
 D11 0 sec  
 TD0 1

==== CHANNEL f1 =====  
 SFO1 400.2424716 MHz  
 NUC1 1H  
 P1 14.30 usec  
 PLW1 12.00000000 W

==== CHANNEL f2 =====  
 SFO2 400.2424716 MHz  
 NUC2 off  
 CPDPRG[2]  
 PCPD2 0 usec  
 PLW2 0 W  
 PLW12 0 W  
 PLW13 0 W

F2 - Processing parameters  
 SI 65536  
 SF 400.2400053 MHz  
 WDW EM  
 SSB 0  
 LB 0.30 Hz  
 GB 0  
 PC 1.00

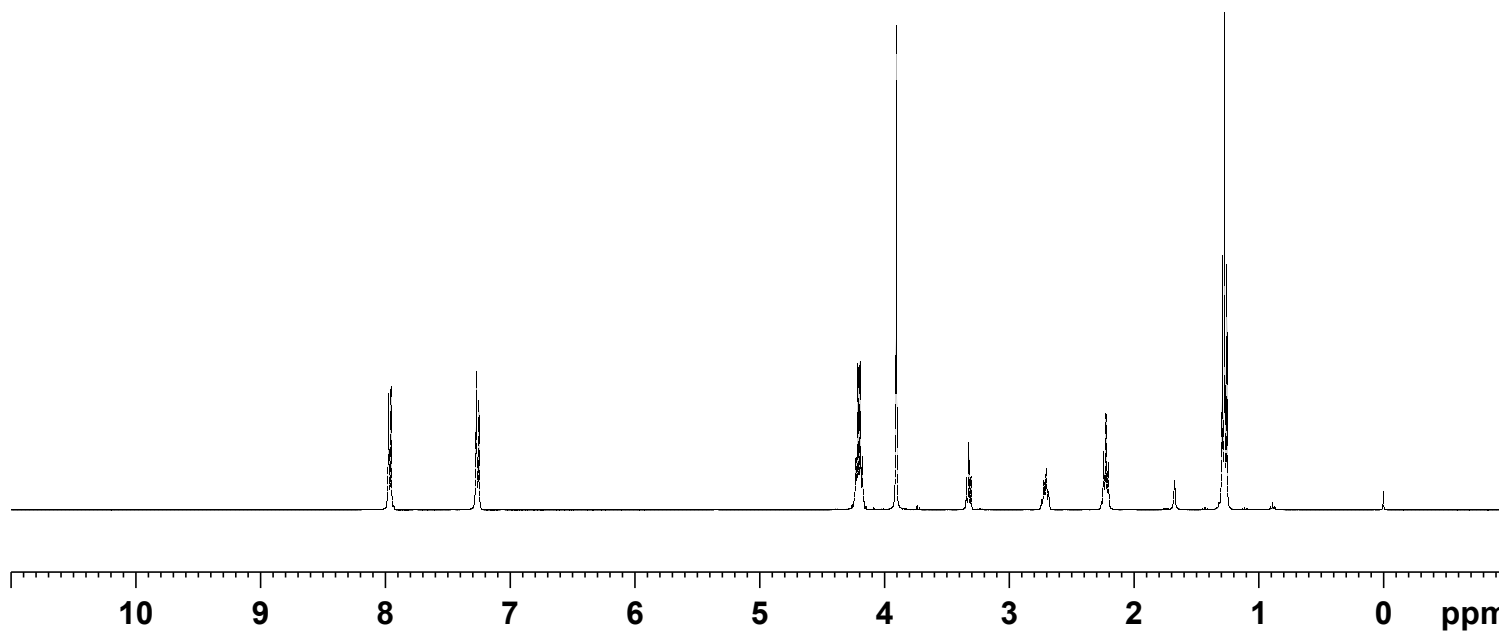

2.00  
2.15

3.98  
3.10  
0.91  
1.16  
2.03  
6.07

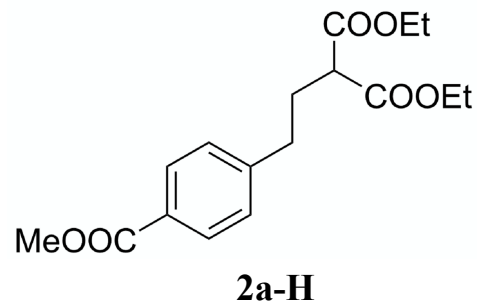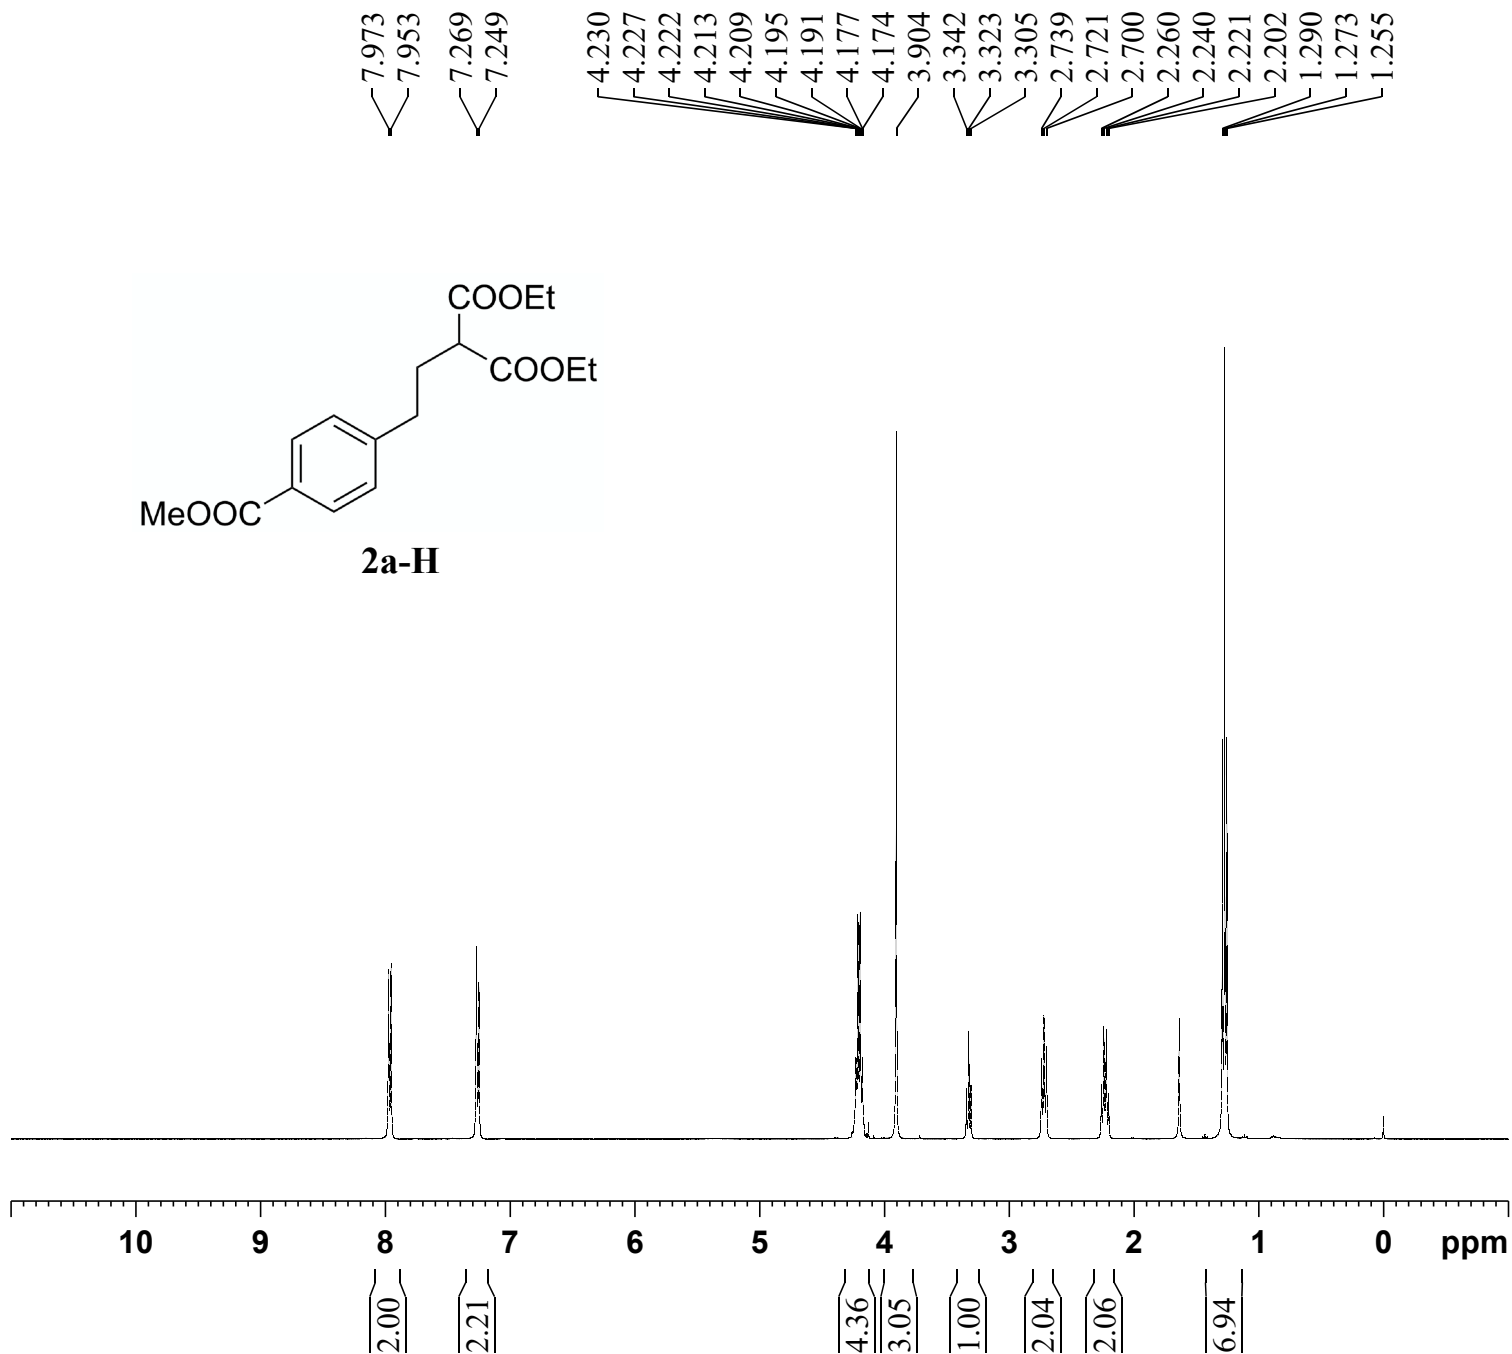

Current Data Parameters  
 NAME 400M-2022  
 EXPNO 5  
 PROCNO 1

F2 - Acquisition Parameters  
 Date\_ 20220701  
 Time 4.28  
 INSTRUM spect  
 PROBHD 5 mm PABBO BB/  
 PULPROG zg30  
 TD 32768  
 SOLVENT CDCl3  
 NS 16  
 DS 0  
 SWH 8012.820 Hz  
 FIDRES 0.244532 Hz  
 AQ 2.0447233 sec  
 RG 206.33  
 DW 62.400 usec  
 DE 6.50 usec  
 TE 300.9 K  
 D1 2.00000000 sec  
 D11 0 sec  
 TD0 1

==== CHANNEL f1 =====  
 SFO1 400.2424716 MHz  
 NUC1 1H  
 P1 14.30 usec  
 PLW1 12.00000000 W

==== CHANNEL f2 =====  
 SFO2 400.2424716 MHz  
 NUC2 off  
 CPDPRG[2]  
 PCPD2 0 usec  
 PLW2 0 W  
 PLW12 0 W  
 PLW13 0 W

F2 - Processing parameters  
 SI 65536  
 SF 400.2400066 MHz  
 WDW EM  
 SSB 0  
 LB 0.30 Hz  
 GB 0  
 PC 1.00

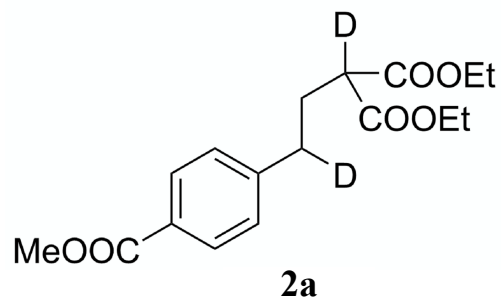

169.14  
167.01

146.11

129.83  
128.55  
128.28

61.45  
51.98  
51.17  
33.32  
33.17  
32.97  
32.78  
29.92  
29.85  
14.07

Current Data Parameters  
NAME 400M-2022  
EXPNO 4  
PROCNO 1

F2 - Acquisition Parameters

Date\_ 20220701  
Time 4.25  
INSTRUM spect  
PROBHD 5 mm PABBO BB/  
PULPROG zgpg30  
TD 65536  
SOLVENT CDCl3  
NS 512  
DS 4  
SWH 24038.461 Hz  
FIDRES 0.366798 Hz  
AQ 1.3631488 sec  
RG 206.33  
DW 20.800 usec  
DE 6.50 usec  
TE 301.6 K  
D1 2.0000000 sec  
D11 0.0300000 sec  
TD0 1

==== CHANNEL f1 =====  
SFO1 100.6504916 MHz  
NUC1 13C  
P1 10.00 usec  
PLW1 54.0000000 W

==== CHANNEL f2 =====  
SFO2 400.2416010 MHz  
NUC2 1H  
CPDPRG[2] waltz16  
PCPD2 90.00 usec  
PLW2 12.0000000 W  
PLW12 0.30294999 W  
PLW13 0.24539000 W

F2 - Processing parameters  
SI 32768  
SF 100.6404280 MHz  
WDW EM  
SSB 0  
LB 1.00 Hz  
GB 0  
PC 1.40

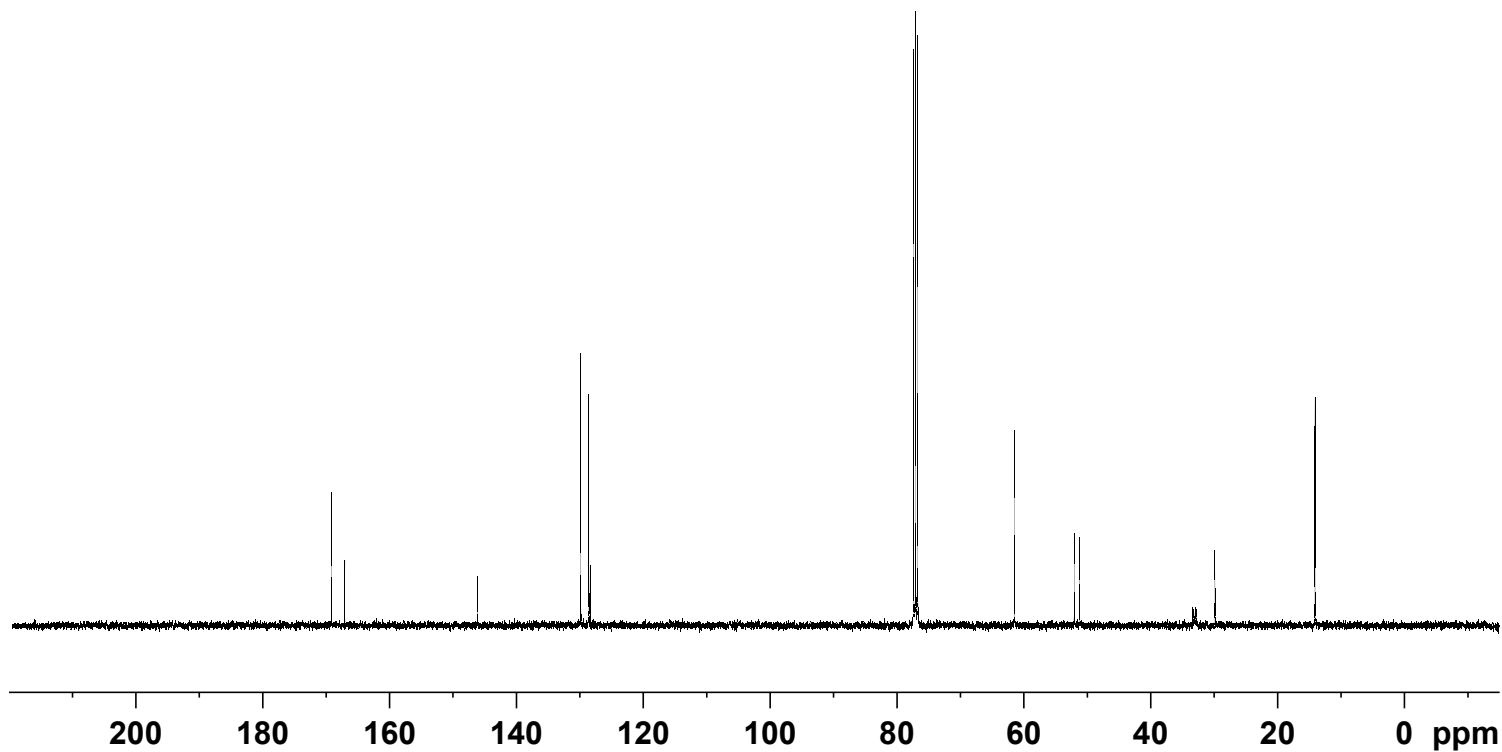

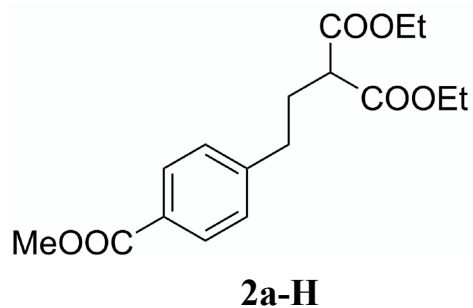

169.15  
167.02

146.14

129.83  
128.56  
128.28

61.46  
51.99  
51.20

33.33  
29.92

14.07

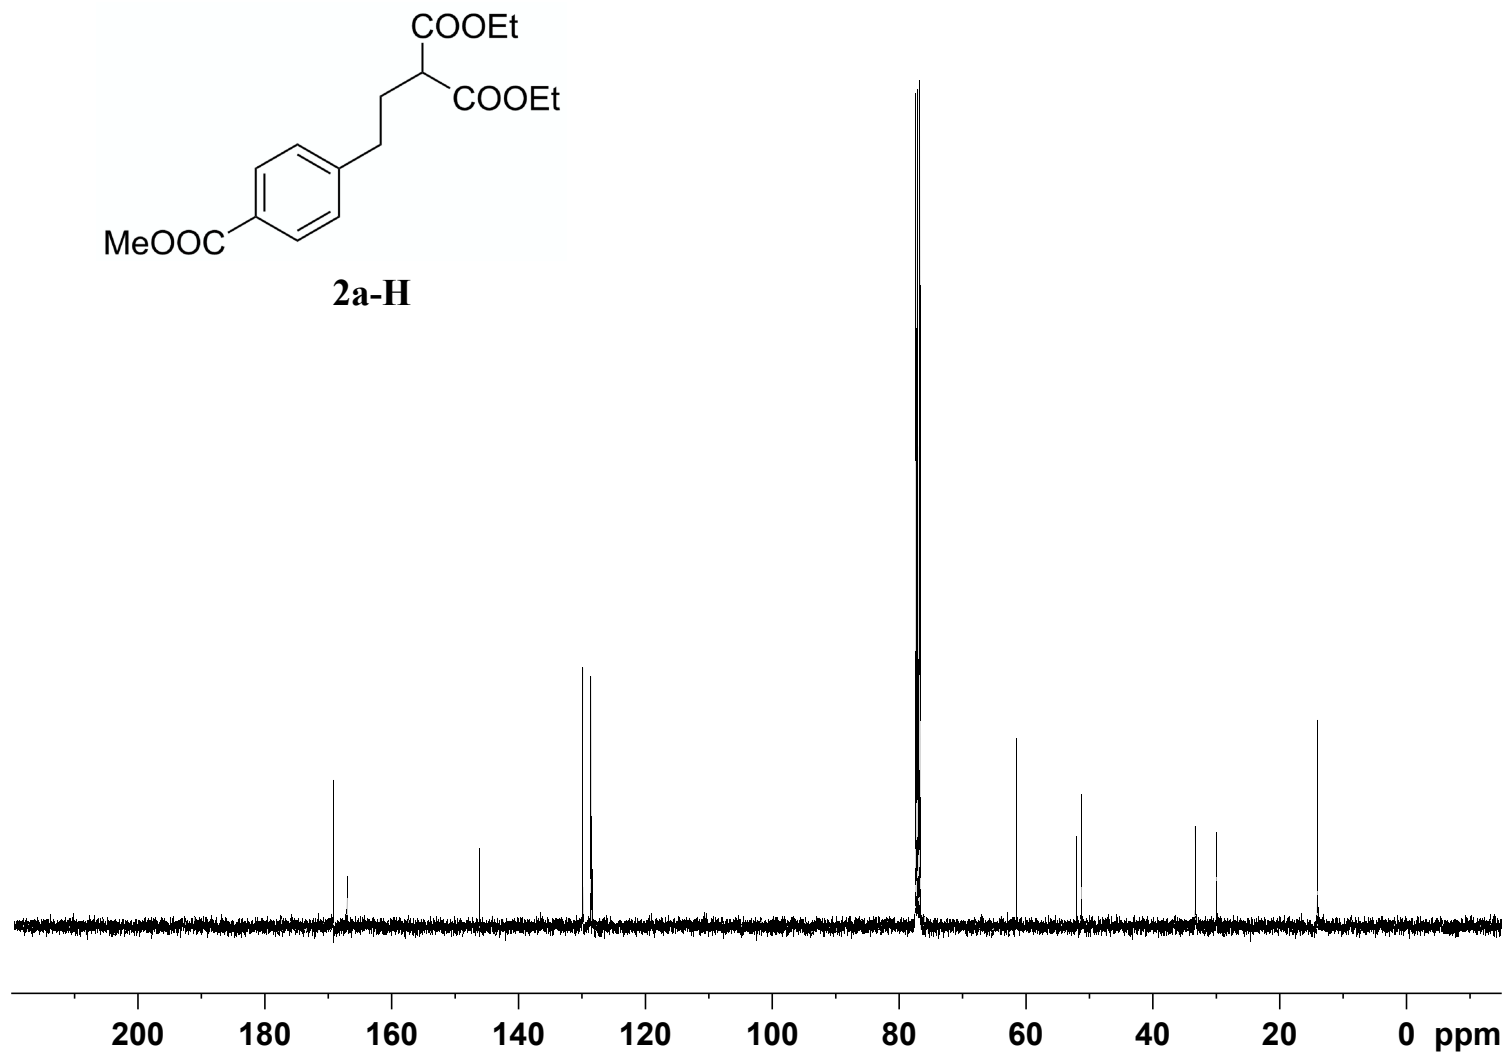

Current Data Parameters  
 NAME 400M-2022  
 EXPNO 6  
 PROCNO 1

F2 - Acquisition Parameters  
 Date\_ 20220701  
 Time 4.43  
 INSTRUM spect  
 PROBHD 5 mm PABBO BB/  
 PULPROG zgpg30  
 TD 65536  
 SOLVENT CDCl3  
 NS 256  
 DS 4  
 SWH 24038.461 Hz  
 FIDRES 0.366798 Hz  
 AQ 1.3631488 sec  
 RG 206.33  
 DW 20.800 usec  
 DE 6.50 usec  
 TE 301.6 K  
 D1 2.00000000 sec  
 D11 0.03000000 sec  
 TD0 1

==== CHANNEL f1 =====  
 SFO1 100.6504916 MHz  
 NUC1 13C  
 P1 10.00 usec  
 PLW1 54.00000000 W

==== CHANNEL f2 =====  
 SFO2 400.2416010 MHz  
 NUC2 1H  
 CPDPRG[2] waltz16  
 PCPD2 90.00 usec  
 PLW2 12.00000000 W  
 PLW12 0.30294999 W  
 PLW13 0.24539000 W

F2 - Processing parameters  
 SI 32768  
 SF 100.6404280 MHz  
 WDW EM  
 SSB 0  
 LB 1.00 Hz  
 GB 0  
 PC 1.40

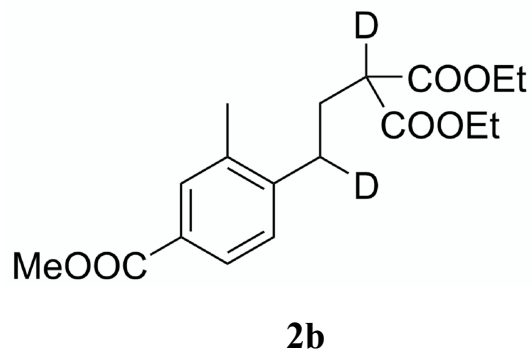

Chemical shift values (ppm) for the peaks in the spectrum:

- 7.822, 7.804, 7.784, 7.209, 7.189
- 4.240, 4.236, 4.222, 4.218, 4.204, 4.200, 4.187, 4.183, 3.894, 3.396, 3.378, 3.360, 2.716, 2.697, 2.677, 2.658, 2.356, 2.173, 2.154, 2.134, 1.297, 1.279, 1.261

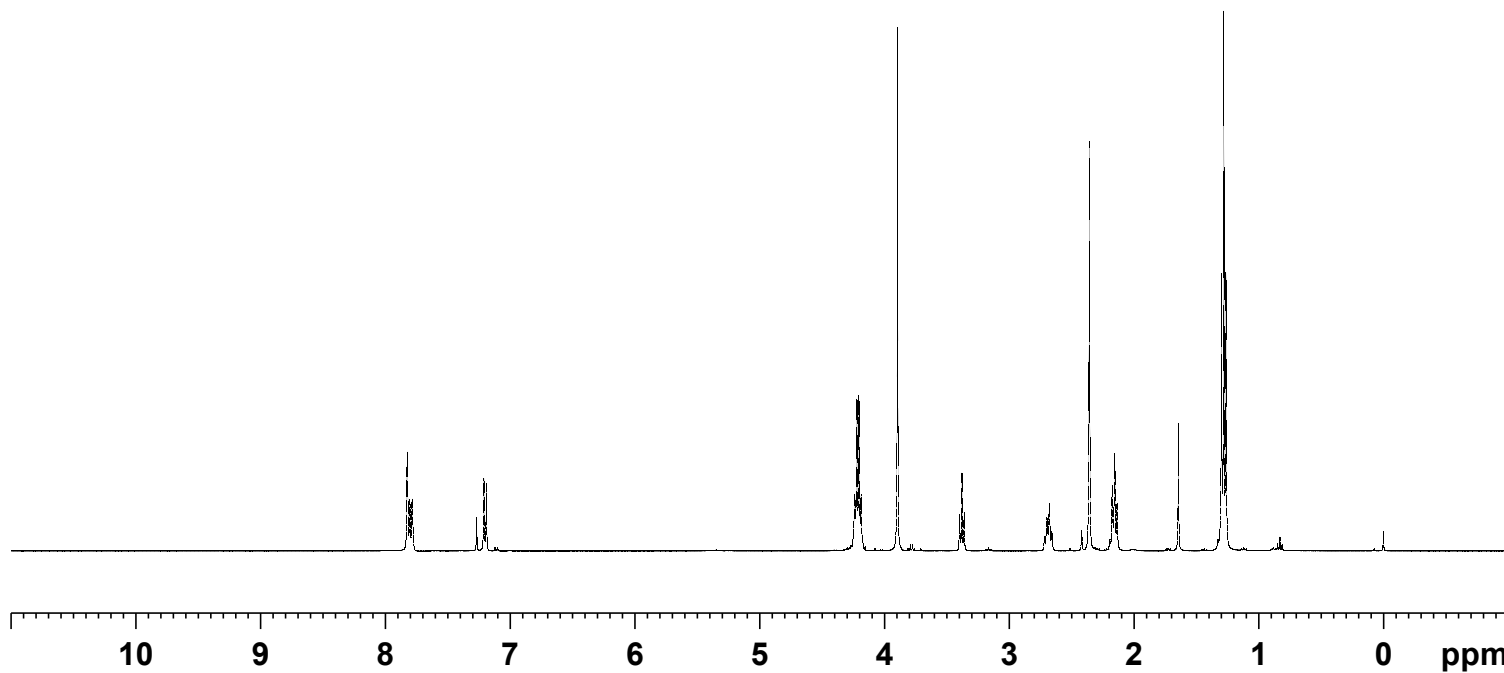

Integration values for the peaks in the spectrum:

- 2.07
- 1.00
- 4.13
- 3.16
- 0.99
- 1.22
- 3.09
- 2.09
- 6.74

Current Data Parameters

NAME 400M-2022  
 EXPNO 11  
 PROCNO 1

F2 - Acquisition Parameters

Date\_ 20220701  
 Time 5.39  
 INSTRUM spect  
 PROBHD 5 mm PABBO BB/  
 PULPROG zg30  
 TD 32768  
 SOLVENT CDCl3  
 NS 16  
 DS 0  
 SWH 8012.820 Hz  
 FIDRES 0.244532 Hz  
 AQ 2.0447233 sec  
 RG 102.73  
 DW 62.400 usec  
 DE 6.50 usec  
 TE 300.9 K  
 D1 2.00000000 sec  
 D11 0 sec  
 TD0 1

==== CHANNEL f1 =====

SFO1 400.2424716 MHz  
 NUC1 1H  
 P1 14.30 usec  
 PLW1 12.00000000 W

==== CHANNEL f2 =====

SFO2 400.2424716 MHz  
 NUC2 off  
 CPDPRG[2]  
 PCPD2 0 usec  
 PLW2 0 W  
 PLW12 0 W  
 PLW13 0 W

F2 - Processing parameters

SI 65536  
 SF 400.2400067 MHz  
 WDW EM  
 SSB 0  
 LB 0.30 Hz  
 GB 0  
 PC 1.00

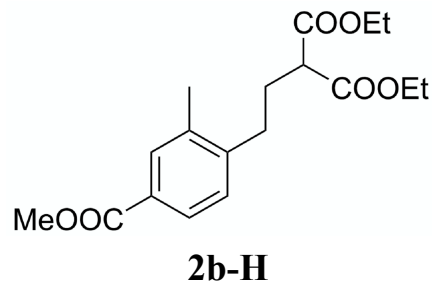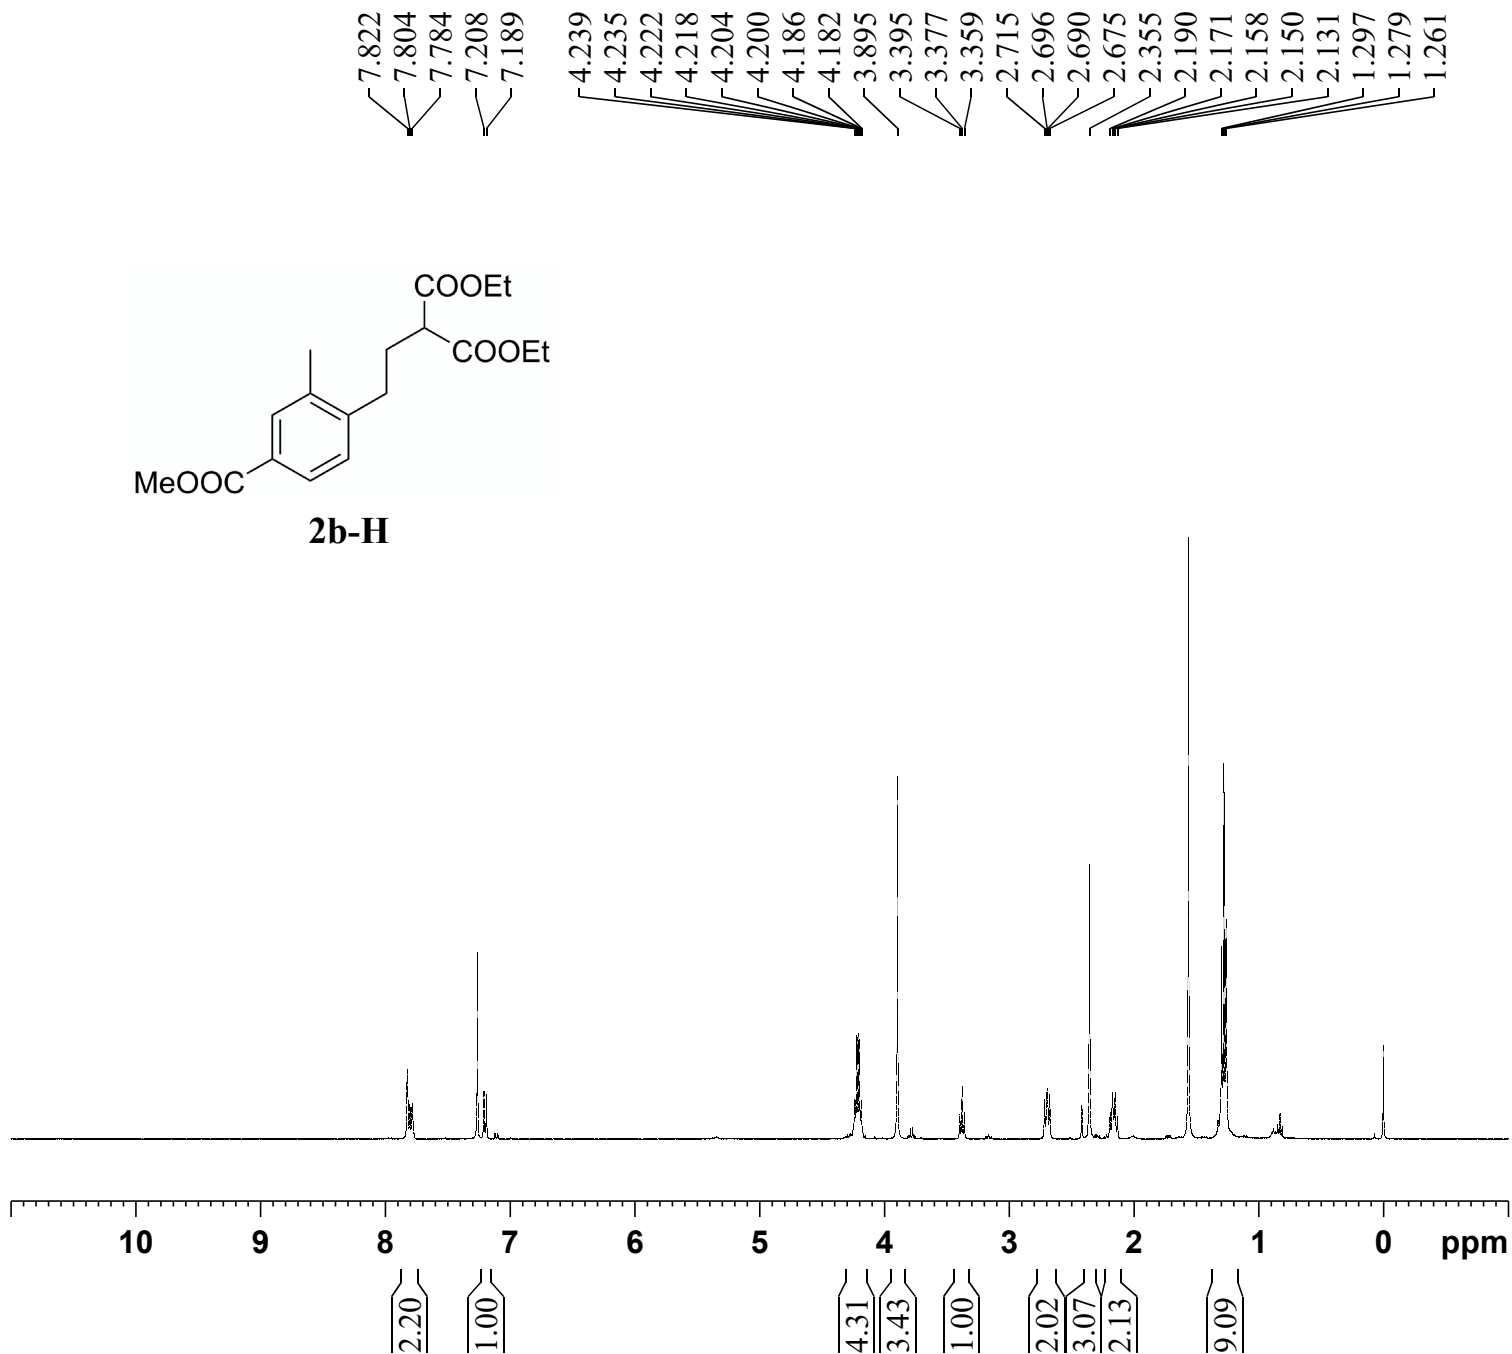

Current Data Parameters  
 NAME 400M-2022  
 EXPNO 13  
 PROCNO 1

F2 - Acquisition Parameters  
 Date\_ 20220701  
 Time 6.12  
 INSTRUM spect  
 PROBHD 5 mm PABBO BB/  
 PULPROG zg30  
 TD 32768  
 SOLVENT CDCl3  
 NS 16  
 DS 0  
 SWH 8012.820 Hz  
 FIDRES 0.244532 Hz  
 AQ 2.0447233 sec  
 RG 206.33  
 DW 62.400 usec  
 DE 6.50 usec  
 TE 300.9 K  
 D1 2.00000000 sec  
 D11 0 sec  
 TD0 1

===== CHANNEL f1 =====  
 SFO1 400.2424716 MHz  
 NUC1 1H  
 P1 14.30 usec  
 PLW1 12.00000000 W

===== CHANNEL f2 =====  
 SFO2 400.2424716 MHz  
 NUC2 off  
 CPDPRG[2]  
 PCPD2 0 usec  
 PLW2 0 W  
 PLW12 0 W  
 PLW13 0 W

F2 - Processing parameters  
 SI 65536  
 SF 400.2400092 MHz  
 WDW EM  
 SSB 0  
 LB 0.30 Hz  
 GB 0  
 PC 1.00



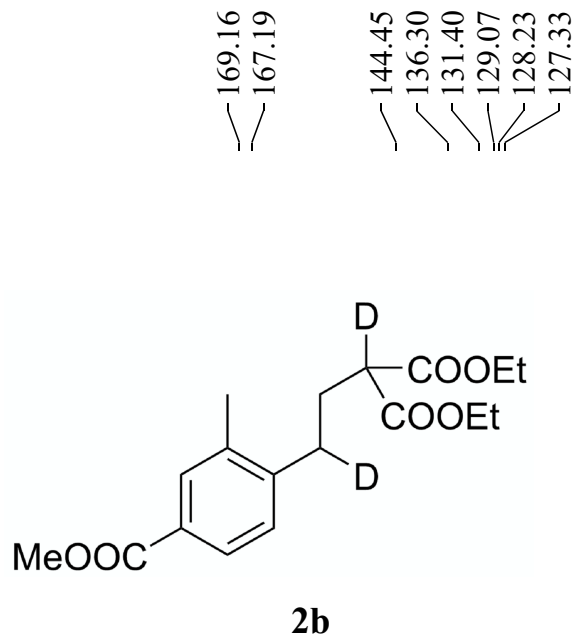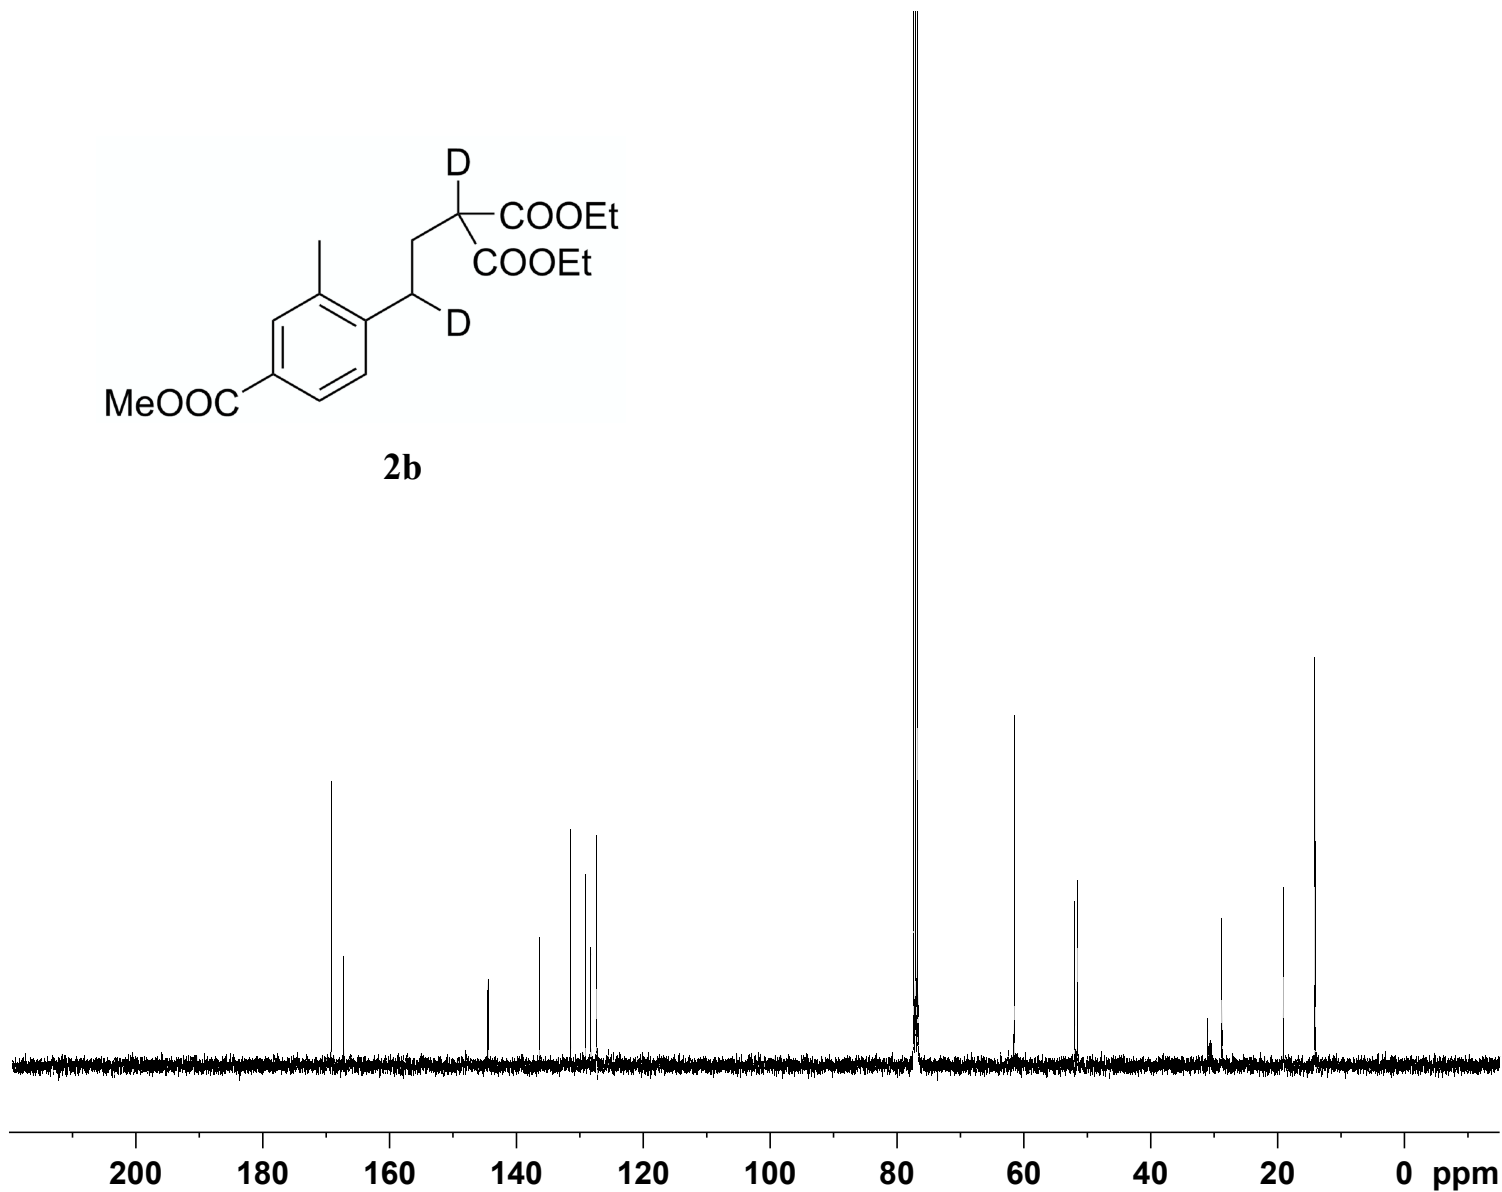

Current Data Parameters  
 NAME 400M-2022  
 EXPNO 12  
 PROCNO 1

F2 - Acquisition Parameters  
 Date\_ 20220701  
 Time 6.09  
 INSTRUM spect  
 PROBHD 5 mm PABBO BB/  
 PULPROG zgpg30  
 TD 65536  
 SOLVENT CDCl3  
 NS 512  
 DS 4  
 SWH 24038.461 Hz  
 FIDRES 0.366798 Hz  
 AQ 1.3631488 sec  
 RG 206.33  
 DW 20.800 usec  
 DE 6.50 usec  
 TE 301.7 K  
 D1 2.00000000 sec  
 D11 0.03000000 sec  
 TD0 1

==== CHANNEL f1 =====  
 SFO1 100.6504916 MHz  
 NUC1 13C  
 P1 10.00 usec  
 PLW1 54.00000000 W

==== CHANNEL f2 =====  
 SFO2 400.2416010 MHz  
 NUC2 1H  
 CPDPRG[2] waltz16  
 PCPD2 90.00 usec  
 PLW2 12.00000000 W  
 PLW12 0.30294999 W  
 PLW13 0.24539000 W

F2 - Processing parameters  
 SI 32768  
 SF 100.6404280 MHz  
 WDW EM  
 SSB 0  
 LB 1.00 Hz  
 GB 0  
 PC 1.40

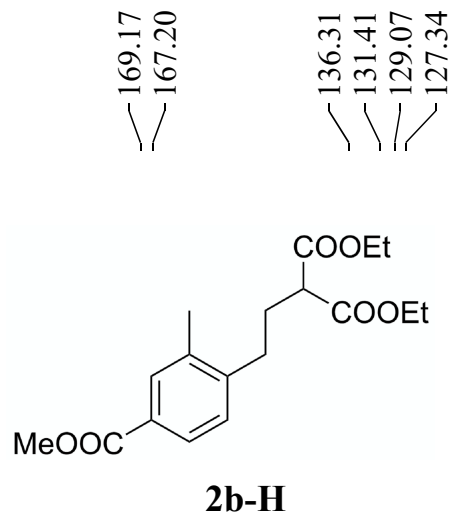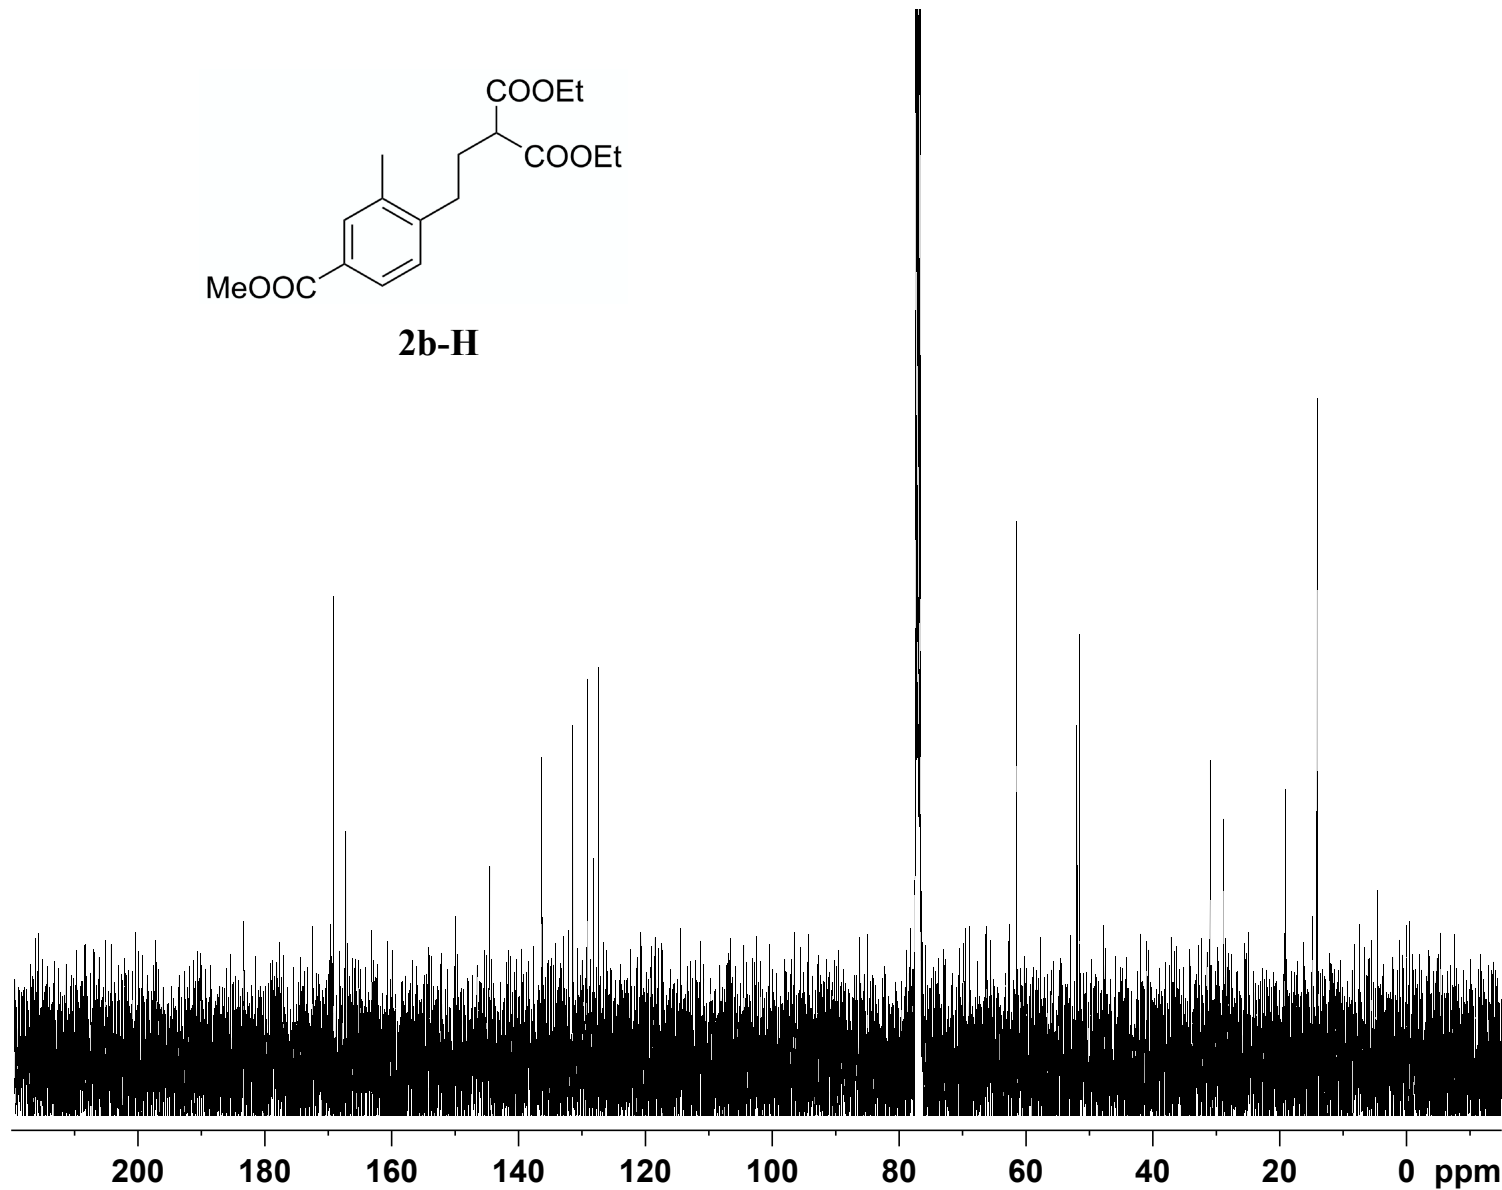

Current Data Parameters  
 NAME 400M-2022  
 EXPNO 14  
 PROCNO 1

F2 - Acquisition Parameters  
 Date\_ 20220701  
 Time 7.11  
 INSTRUM spect  
 PROBHD 5 mm PABBO BB/  
 PULPROG zgpg30  
 TD 65536  
 SOLVENT CDCl3  
 NS 1024  
 DS 4  
 SWH 24038.461 Hz  
 FIDRES 0.366798 Hz  
 AQ 1.3631488 sec  
 RG 206.33  
 DW 20.800 usec  
 DE 6.50 usec  
 TE 301.6 K  
 D1 2.0000000 sec  
 D11 0.0300000 sec  
 TD0 1

==== CHANNEL f1 =====  
 SFO1 100.6504916 MHz  
 NUC1 13C  
 P1 10.00 usec  
 PLW1 54.0000000 W

==== CHANNEL f2 =====  
 SFO2 400.2416010 MHz  
 NUC2 1H  
 CPDPRG[2] waltz16  
 PCPD2 90.00 usec  
 PLW2 12.0000000 W  
 PLW12 0.30294999 W  
 PLW13 0.24539000 W

F2 - Processing parameters  
 SI 32768  
 SF 100.6404280 MHz  
 WDW EM  
 SSB 0  
 LB 1.00 Hz  
 GB 0  
 PC 1.40

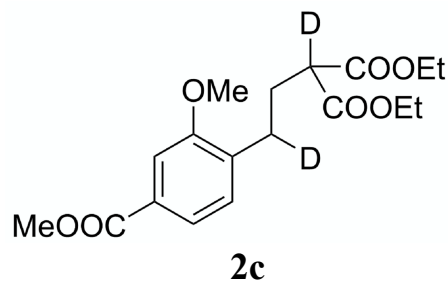

7.588  
7.572  
7.570  
7.495  
7.188  
7.173

4.219  
4.205  
4.196  
4.191  
4.182  
4.168  
3.907  
3.866  
3.331  
3.316  
3.301  
2.729  
2.711  
2.679  
2.201  
2.186  
2.171  
1.284  
1.270  
1.255

Current Data Parameters  
NAME 500M-2022  
EXPNO 11  
PROCNO 1

F2 - Acquisition Parameters  
Date\_ 20220218  
Time 21.46  
INSTRUM spect  
PROBHD 5 mm CPPBBO BB  
PULPROG zg30  
TD 65536  
SOLVENT CDCl3  
NS 16  
DS 2  
SWH 10000.000 Hz  
FIDRES 0.152588 Hz  
AQ 3.2767999 sec  
RG 31.72  
DW 50.000 usec  
DE 6.50 usec  
TE 298.2 K  
D1 1.00000000 sec  
D11 0 sec  
TD0 1

==== CHANNEL f1 =====  
SFO1 500.1330885 MHz  
NUC1 1H  
P1 11.25 usec  
PLW1 20.00000000 W

==== CHANNEL f2 =====  
SFO2 500.1330885 MHz  
NUC2 off  
CPDPRG[2]  
PCPD2 0 usec  
PLW2 0 W  
PLW12 0 W  
PLW13 0 W

F2 - Processing parameters  
SI 65536  
SF 500.1300070 MHz  
WDW EM  
SSB 0  
LB 0.30 Hz  
GB 0  
PC 1.00

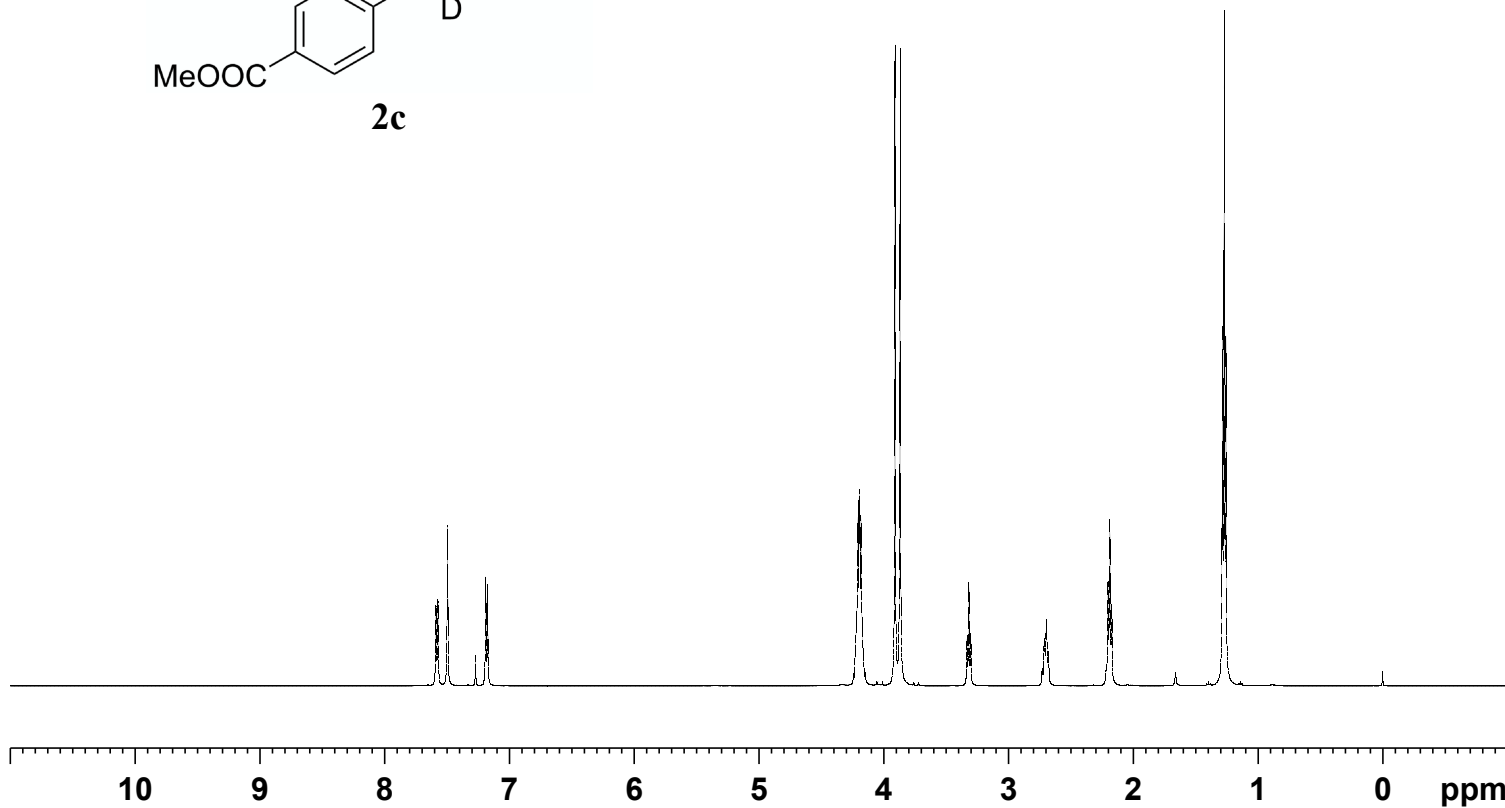

1.00  
1.01  
1.01

4.05  
6.11  
0.99  
1.20  
2.06  
6.38

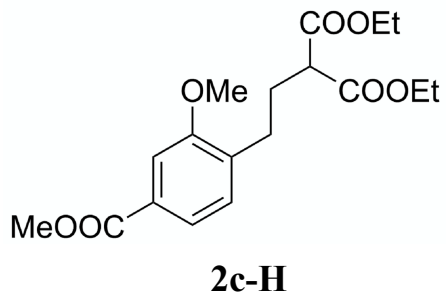

7.586  
 7.571  
 7.495  
 7.189  
 7.173  
 4.226  
 4.219  
 4.209  
 4.205  
 4.196  
 4.191  
 4.182  
 4.168  
 4.160  
 3.907  
 3.867  
 3.332  
 3.318  
 3.303  
 2.729  
 2.714  
 2.699  
 2.217  
 2.202  
 2.187  
 2.172  
 1.284  
 1.270  
 1.255

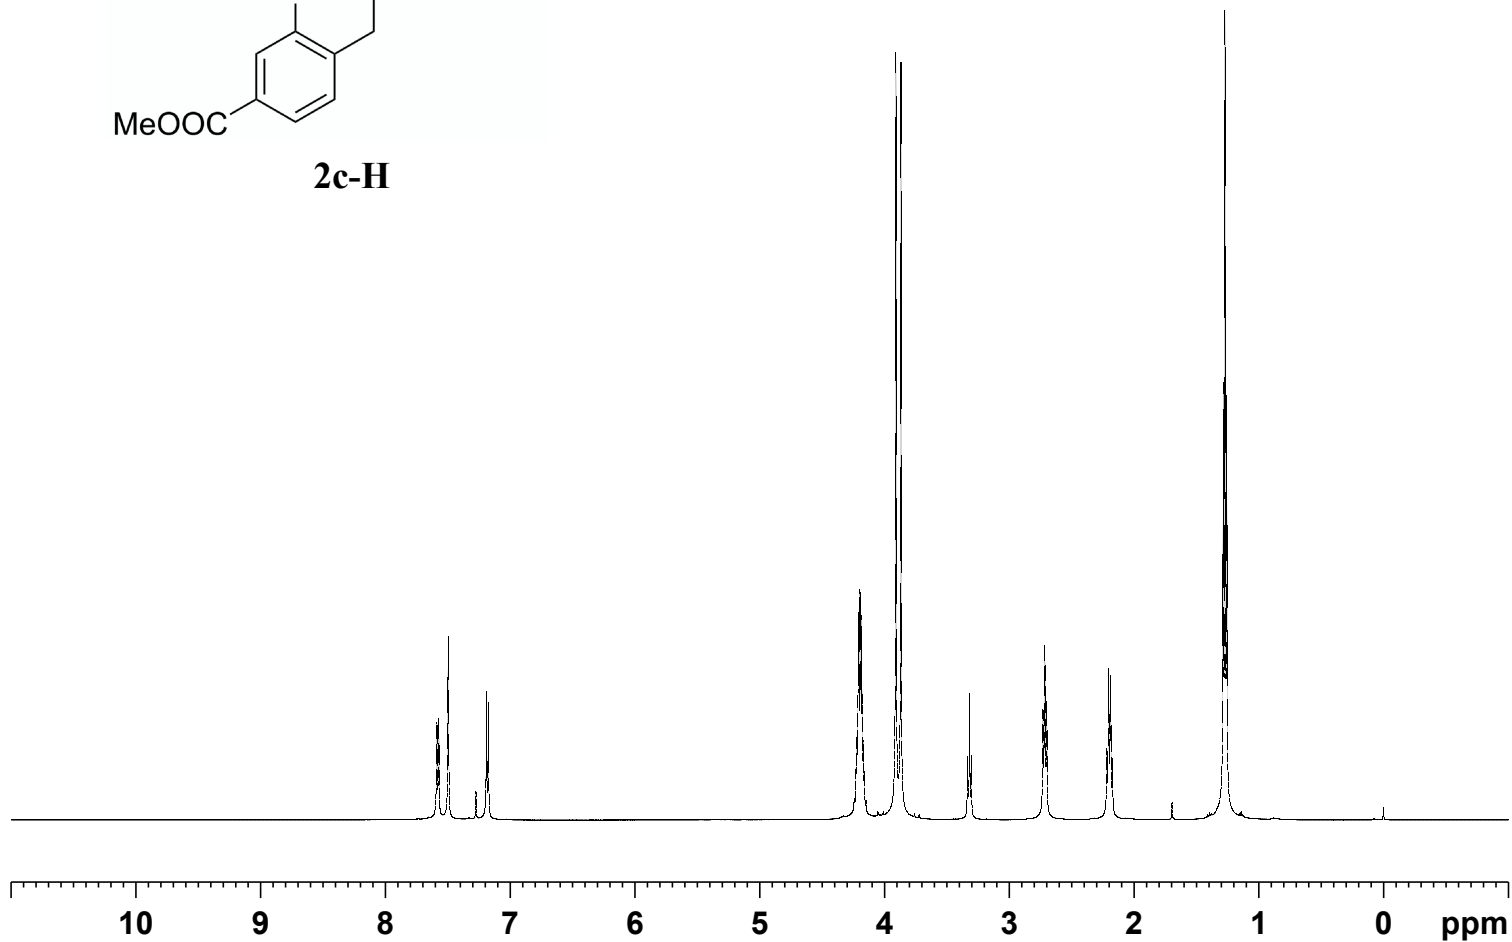

Current Data Parameters  
 NAME 500M-2022  
 EXPNO 9  
 PROCNO 1

F2 - Acquisition Parameters  
 Date\_ 20220218  
 Time 21.28  
 INSTRUM spect  
 PROBHD 5 mm CPPBBO BB  
 PULPROG zg30  
 TD 65536  
 SOLVENT CDCl3  
 NS 16  
 DS 2  
 SWH 10000.000 Hz  
 FIDRES 0.152588 Hz  
 AQ 3.2767999 sec  
 RG 31.72  
 DW 50.000 usec  
 DE 6.50 usec  
 TE 298.2 K  
 D1 1.00000000 sec  
 D11 0 sec  
 TD0 1

===== CHANNEL f1 =====  
 SFO1 500.1330885 MHz  
 NUC1 1H  
 P1 11.25 usec  
 PLW1 20.00000000 W

===== CHANNEL f2 =====  
 SFO2 500.1330885 MHz  
 NUC2 off  
 CPDPRG[2]  
 PCPD2 0 usec  
 PLW2 0 W  
 PLW12 0 W  
 PLW13 0 W

F2 - Processing parameters  
 SI 65536  
 SF 500.1300056 MHz  
 WDW EM  
 SSB 0  
 LB 0.30 Hz  
 GB 0  
 PC 1.00

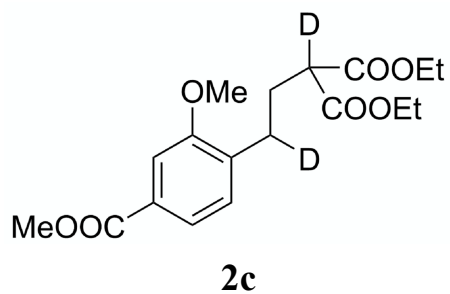

169.35  
167.07  
157.37  
134.70  
134.67  
129.94  
129.51  
122.00  
110.90

61.35  
55.43  
52.09  
51.45  
28.37  
28.30  
28.00  
27.82  
27.67  
27.51  
14.09  
-0.01

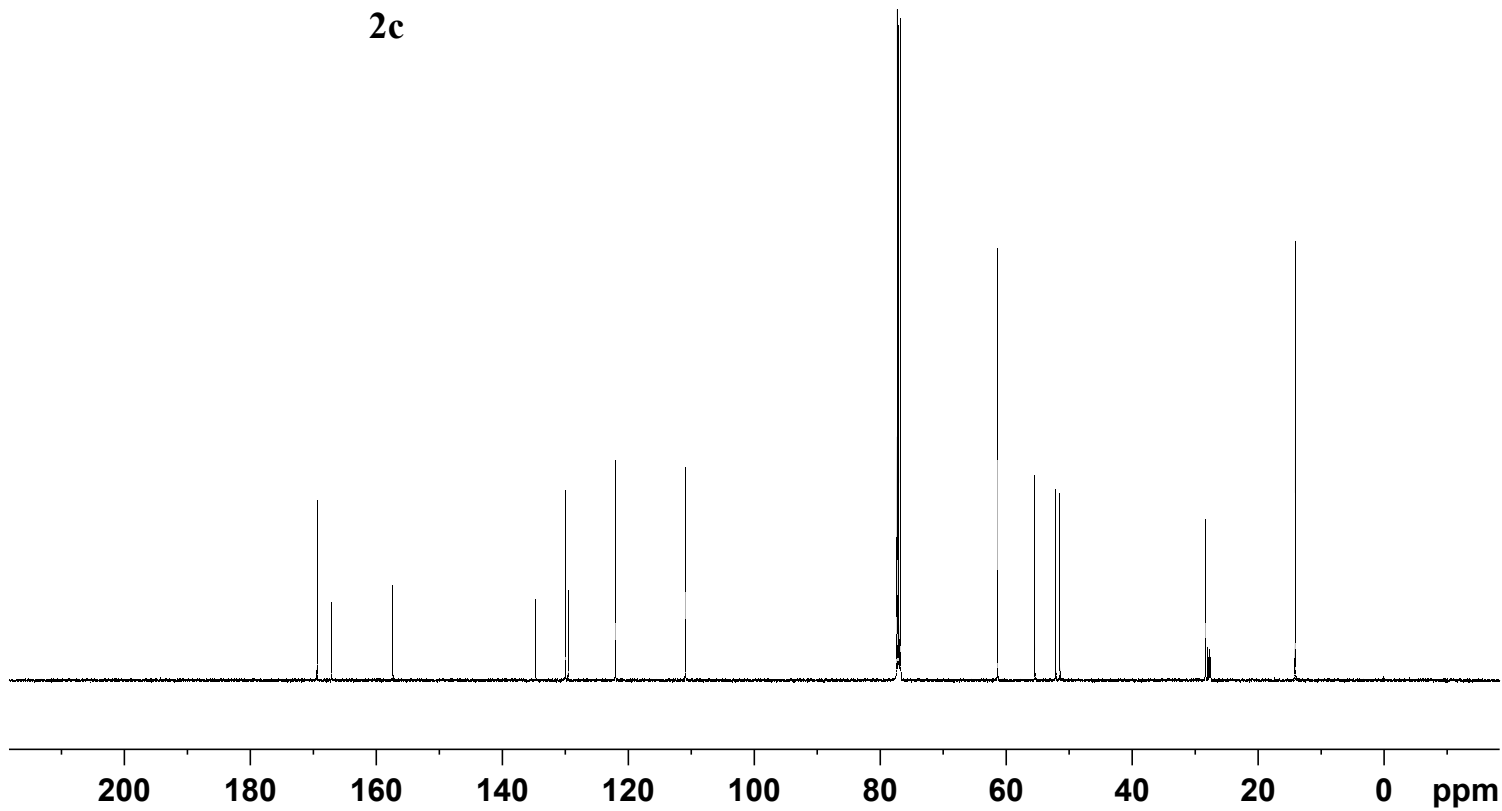

Current Data Parameters  
NAME 500M-2022  
EXPNO 12  
PROCNO 1

F2 - Acquisition Parameters  
Date\_ 20220218  
Time 22.01  
INSTRUM spect  
PROBHD 5 mm CPPBBO BB  
PULPROG zgpg30  
TD 65536  
SOLVENT CDC13  
NS 256  
DS 4  
SWH 29761.904 Hz  
FIDRES 0.454131 Hz  
AQ 1.1010048 sec  
RG 192.89  
DW 16.800 usec  
DE 18.00 usec  
TE 298.2 K  
D1 2.00000000 sec  
D11 0.03000000 sec  
TD0 1

==== CHANNEL f1 =====  
SFO1 125.7703637 MHz  
NUC1 13C  
P1 10.50 usec  
PLW1 57.00000000 W

==== CHANNEL f2 =====  
SFO2 500.1320005 MHz  
NUC2 1H  
CPDPRG[2] waltz16  
PCPD2 80.00 usec  
PLW2 20.00000000 W  
PLW12 0.39550999 W  
PLW13 0.25312999 W

F2 - Processing parameters  
SI 32768  
SF 125.7577885 MHz  
WDW EM  
SSB 0  
LB 1.00 Hz  
GB 0  
PC 1.40

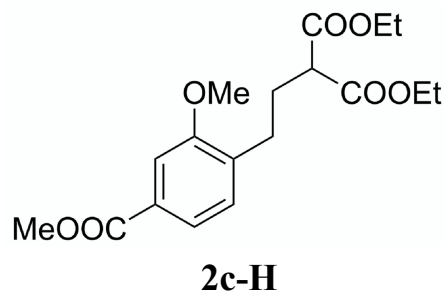

169.34  
 167.06  
 157.36  
 134.70  
 129.94  
 129.50  
 121.99  
 110.90

77.31  
 77.05  
 76.80  
 61.34  
 55.42  
 52.08  
 51.47  
 28.37  
 27.99  
 14.08

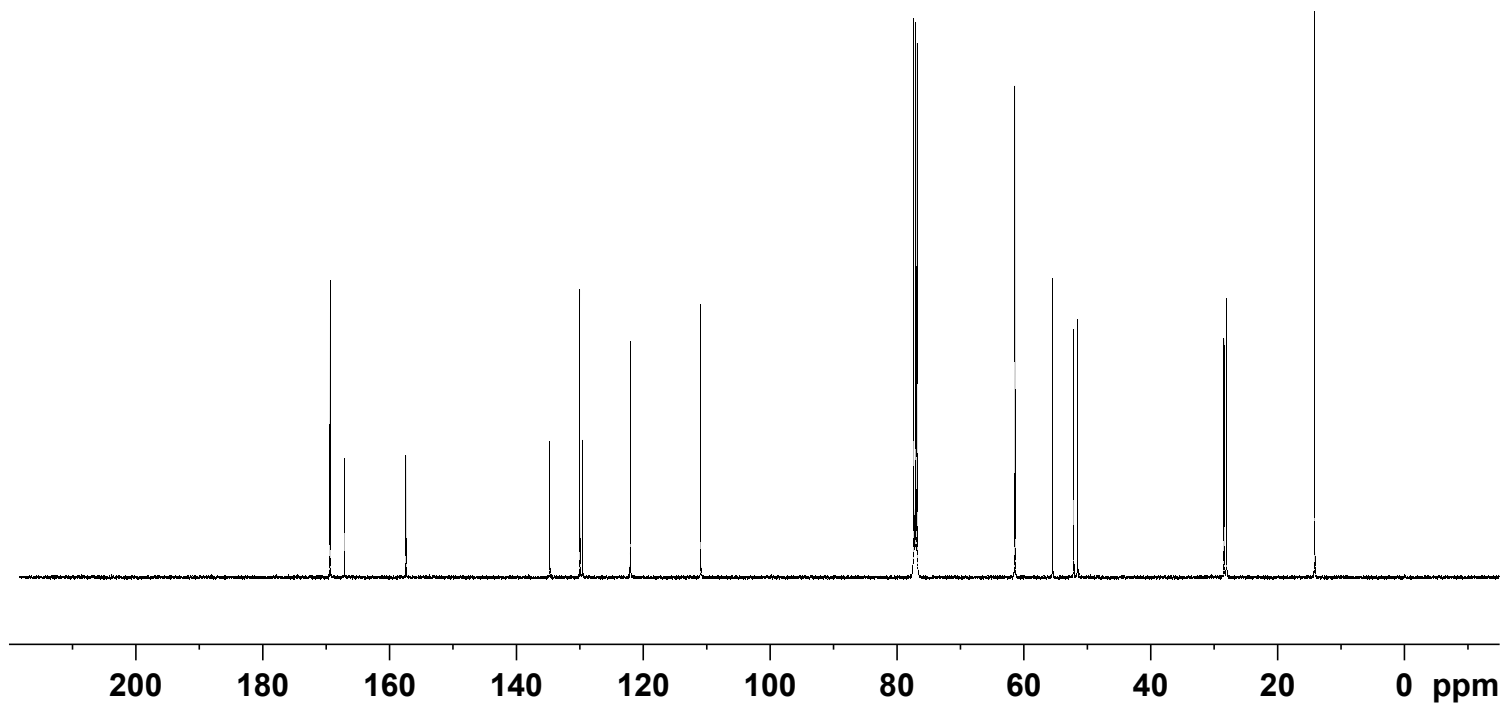

Current Data Parameters  
 NAME 500M-2022  
 EXPNO 10  
 PROCNO 1

F2 - Acquisition Parameters  
 Date\_ 20220218  
 Time 21.43  
 INSTRUM spect  
 PROBHD 5 mm CPPBBO BB  
 PULPROG zgpg30  
 TD 65536  
 SOLVENT CDCl3  
 NS 256  
 DS 4  
 SWH 29761.904 Hz  
 FIDRES 0.454131 Hz  
 AQ 1.1010048 sec  
 RG 192.89  
 DW 16.800 usec  
 DE 18.00 usec  
 TE 298.2 K  
 D1 2.00000000 sec  
 D11 0.03000000 sec  
 TD0 1

===== CHANNEL f1 =====  
 SFO1 125.7703637 MHz  
 NUC1 13C  
 P1 10.50 usec  
 PLW1 57.00000000 W

===== CHANNEL f2 =====  
 SFO2 500.1320005 MHz  
 NUC2 1H  
 CPDPRG[2] waltz16  
 PCPD2 80.00 usec  
 PLW2 20.00000000 W  
 PLW12 0.39550999 W  
 PLW13 0.25312999 W

F2 - Processing parameters  
 SI 32768  
 SF 125.7577885 MHz  
 WDW EM  
 SSB 0  
 LB 1.00 Hz  
 GB 0  
 PC 1.40

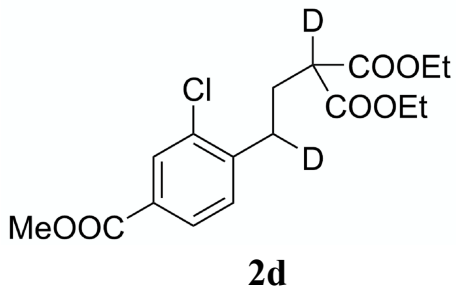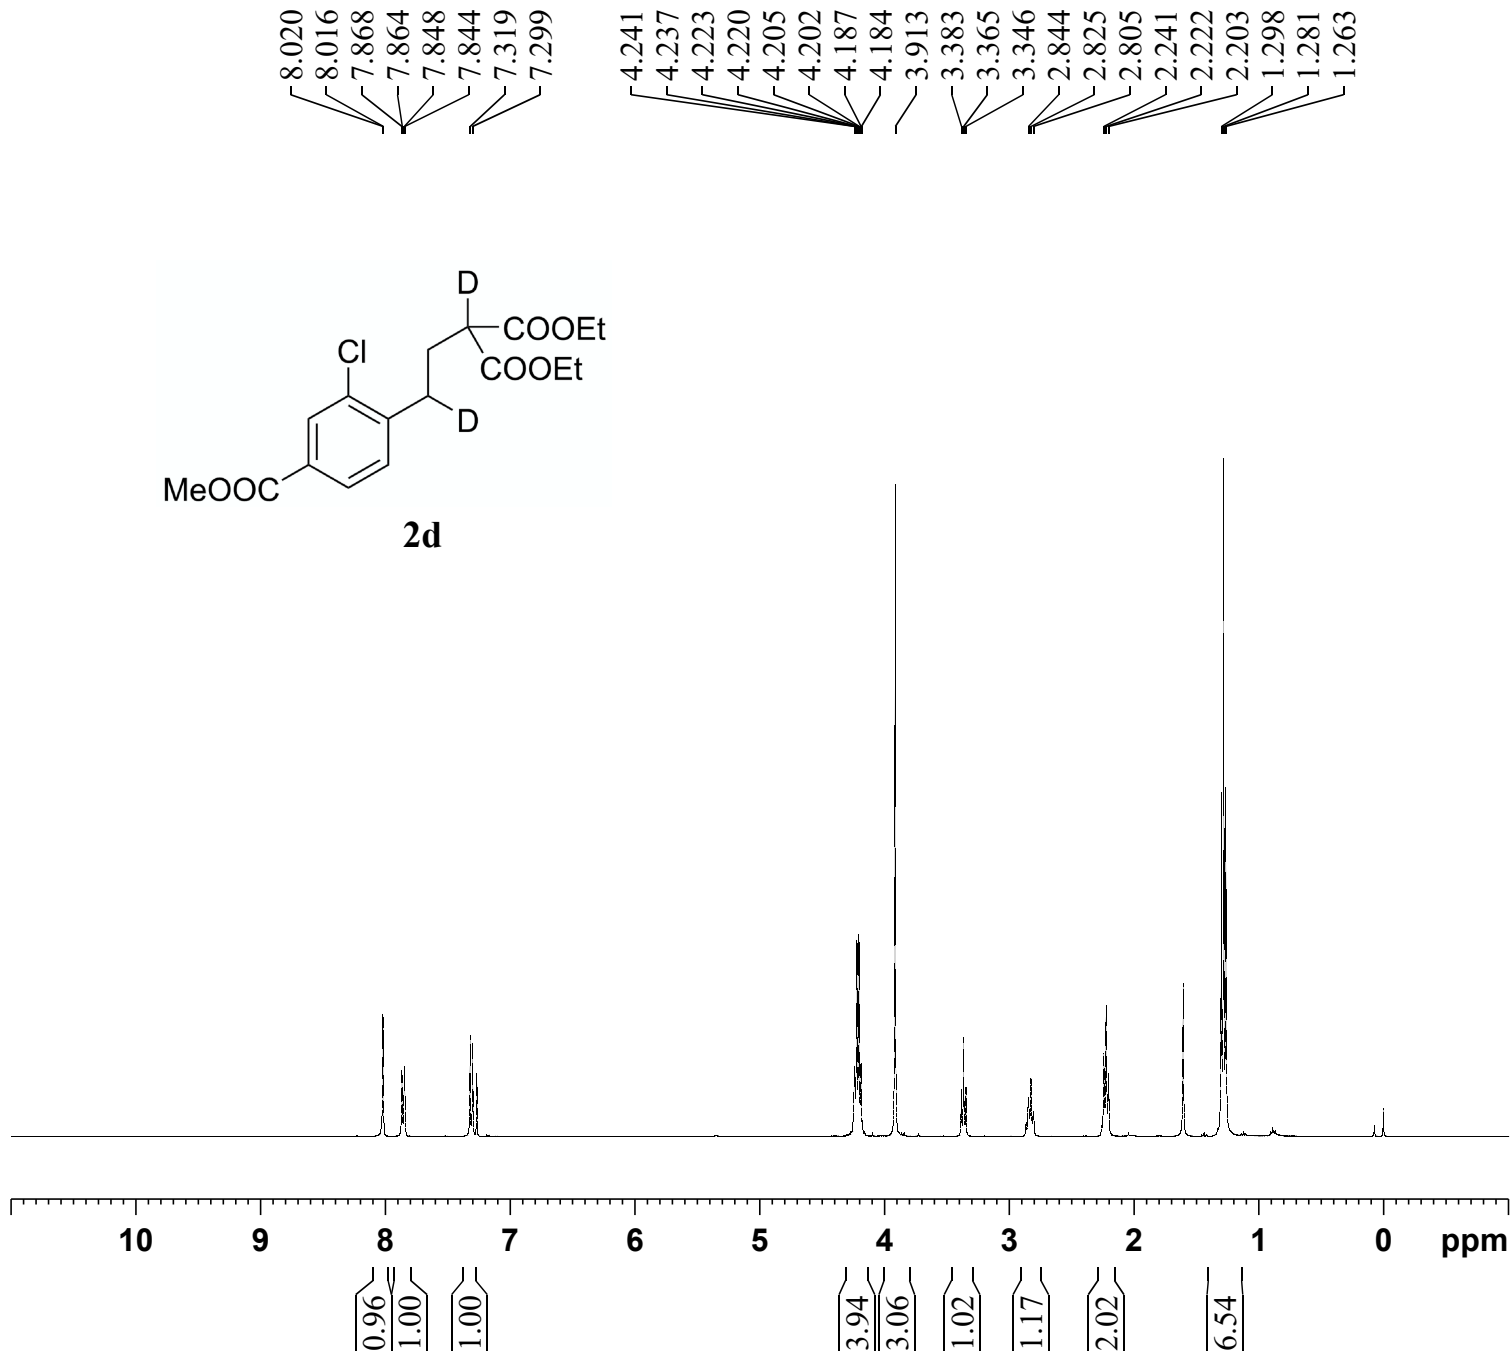

Current Data Parameters  
 NAME 400M-2022  
 EXPNO 7  
 PROCNO 1

F2 - Acquisition Parameters  
 Date\_ 20220701  
 Time 4.47  
 INSTRUM spect  
 PROBHD 5 mm PABBO BB/  
 PULPROG zg30  
 TD 32768  
 SOLVENT CDCl3  
 NS 16  
 DS 0  
 SWH 8012.820 Hz  
 FIDRES 0.244532 Hz  
 AQ 2.0447233 sec  
 RG 206.33  
 DW 62.400 usec  
 DE 6.50 usec  
 TE 300.9 K  
 D1 2.00000000 sec  
 D11 0 sec  
 TD0 1

==== CHANNEL f1 =====  
 SFO1 400.2424716 MHz  
 NUC1 1H  
 P1 14.30 usec  
 PLW1 12.00000000 W

==== CHANNEL f2 =====  
 SFO2 400.2424716 MHz  
 NUC2 off  
 CPDPRG[2]  
 PCPD2 0 usec  
 PLW2 0 W  
 PLW12 0 W  
 PLW13 0 W

F2 - Processing parameters  
 SI 65536  
 SF 400.2400072 MHz  
 WDW EM  
 SSB 0  
 LB 0.30 Hz  
 GB 0  
 PC 1.00

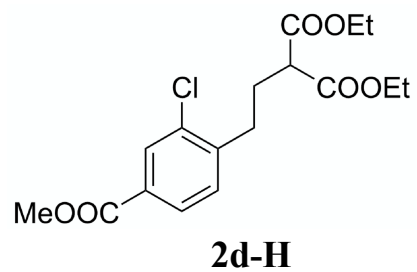

8.020  
8.016  
7.868  
7.864  
7.848  
7.844  
7.320  
7.300

4.241  
4.238  
4.223  
4.220  
4.205  
4.202  
4.188  
4.184  
3.913  
3.385  
3.366  
3.348  
2.864  
2.845  
2.824  
2.259  
2.240  
2.220  
2.201  
1.299  
1.281  
1.263

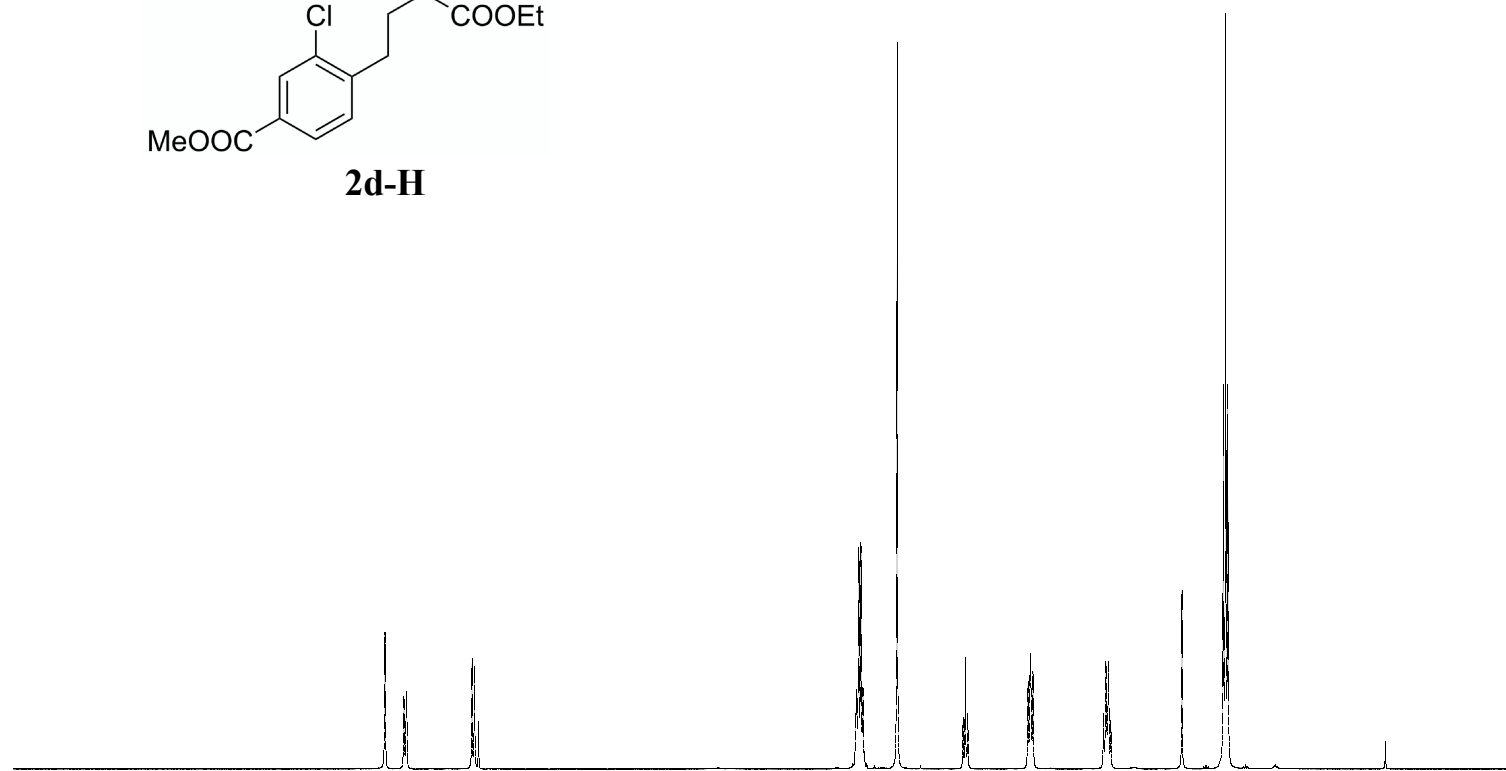

1.00  
1.04  
1.06

4.21  
3.20  
1.04  
2.13  
2.15  
6.77

Current Data Parameters  
NAME 400M-2022  
EXPNO 9  
PROCNO 1

F2 - Acquisition Parameters  
Date\_ 20220701  
Time 5.20  
INSTRUM spect  
PROBHD 5 mm PABBO BB/  
PULPROG zg30  
TD 32768  
SOLVENT CDCl3  
NS 16  
DS 0  
SWH 8012.820 Hz  
FIDRES 0.244532 Hz  
AQ 2.0447233 sec  
RG 206.33  
DW 62.400 usec  
DE 6.50 usec  
TE 300.9 K  
D1 2.00000000 sec  
D11 0 sec  
TD0 1

==== CHANNEL f1 =====  
SFO1 400.2424716 MHz  
NUC1 1H  
P1 14.30 usec  
PLW1 12.00000000 W

==== CHANNEL f2 =====  
SFO2 400.2424716 MHz  
NUC2 off  
CPDPRG[2]  
PCPD2 0 usec  
PLW2 0 W  
PLW12 0 W  
PLW13 0 W

F2 - Processing parameters  
SI 65536  
SF 400.2400061 MHz  
WDW EM  
SSB 0  
LB 0.30 Hz  
GB 0  
PC 1.00



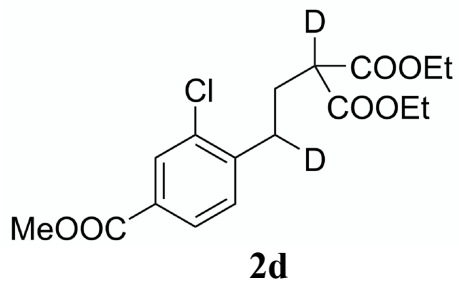

169.04  
 165.86  
 143.59  
 134.22  
 130.70  
 130.46  
 129.95  
 127.98

61.52  
 52.29  
 51.36  
 31.23  
 30.90  
 28.13  
 14.07

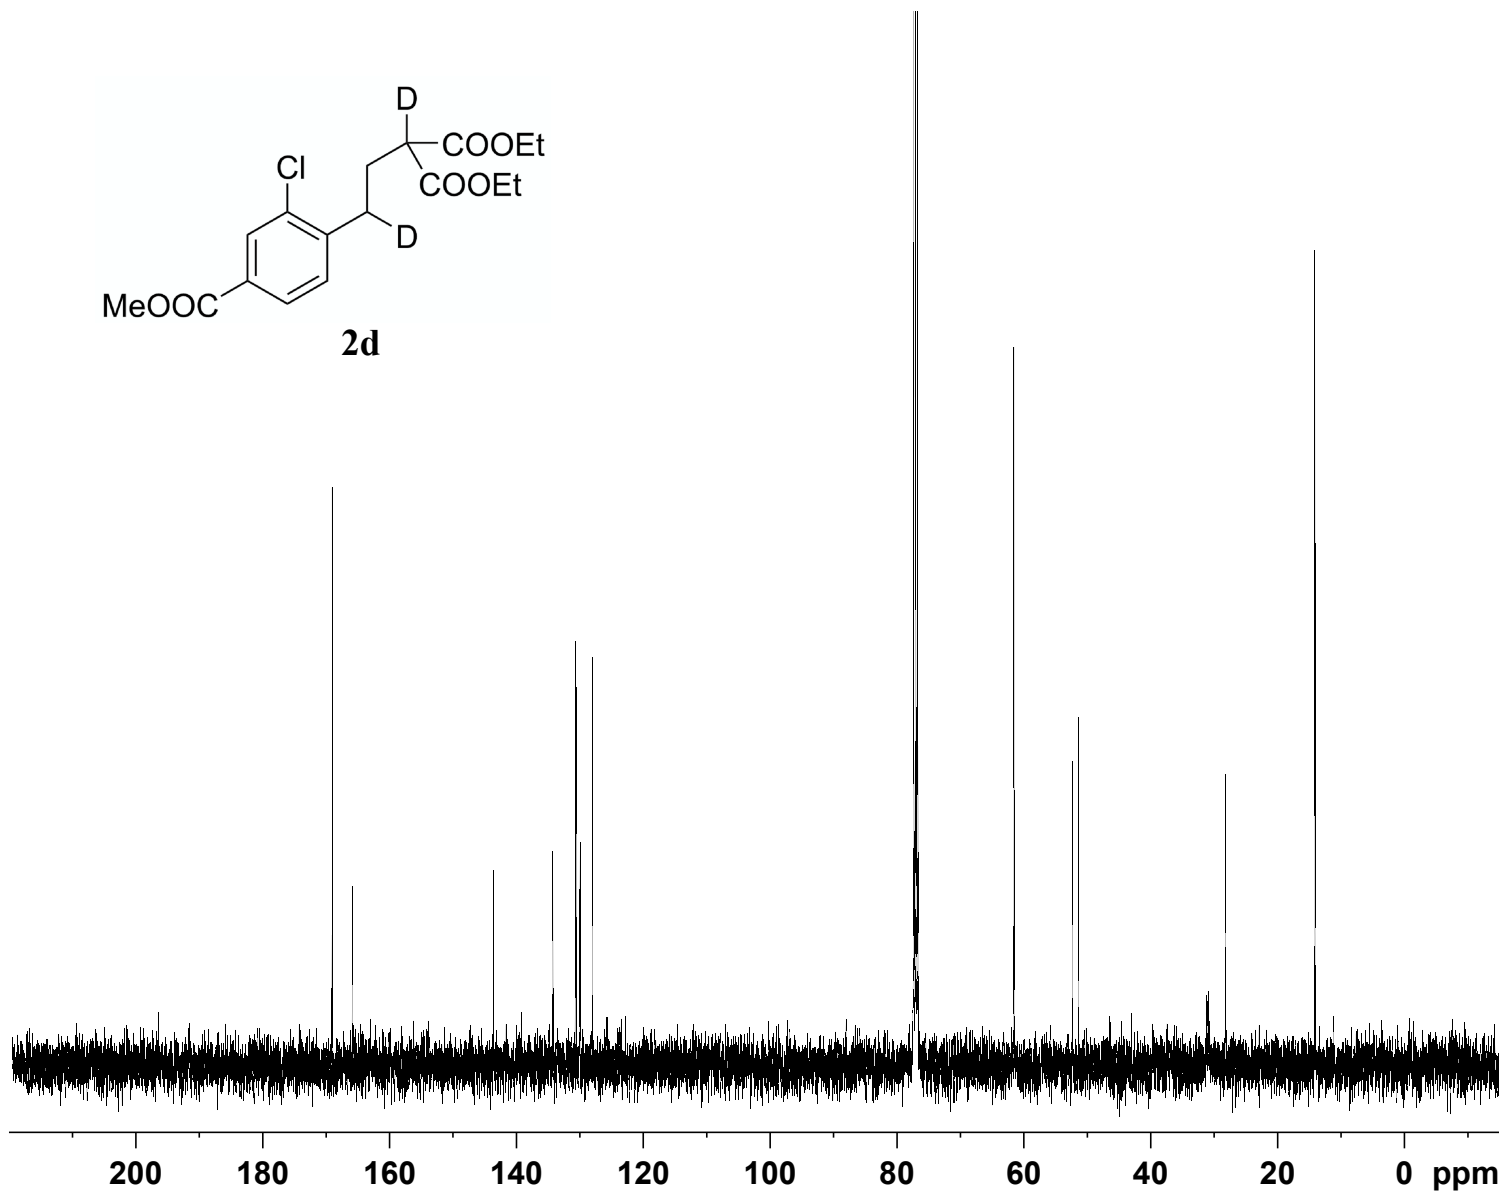

Current Data Parameters  
 NAME 400M-2022  
 EXPNO 8  
 PROCNO 1

F2 - Acquisition Parameters  
 Date\_ 20220701  
 Time 5.17  
 INSTRUM spect  
 PROBHD 5 mm PABBO BB/  
 PULPROG zgpg30  
 TD 65536  
 SOLVENT CDCl3  
 NS 512  
 DS 4  
 SWH 24038.461 Hz  
 FIDRES 0.366798 Hz  
 AQ 1.3631488 sec  
 RG 206.33  
 DW 20.800 usec  
 DE 6.50 usec  
 TE 301.7 K  
 D1 2.00000000 sec  
 D11 0.03000000 sec  
 TD0 1

===== CHANNEL f1 =====  
 SFO1 100.6504916 MHz  
 NUC1 13C  
 P1 10.00 usec  
 PLW1 54.00000000 W

===== CHANNEL f2 =====  
 SFO2 400.2416010 MHz  
 NUC2 1H  
 CPDPRG[2] waltz16  
 PCPD2 90.00 usec  
 PLW2 12.00000000 W  
 PLW12 0.30294999 W  
 PLW13 0.24539000 W

F2 - Processing parameters  
 SI 32768  
 SF 100.6404280 MHz  
 WDW EM  
 SSB 0  
 LB 1.00 Hz  
 GB 0  
 PC 1.40

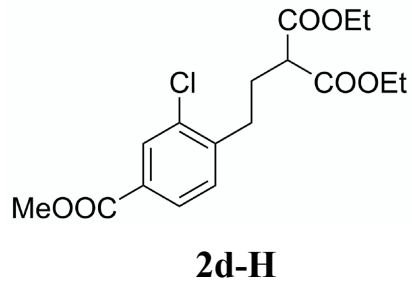

169.03  
 165.86  
 143.62  
 134.22  
 130.70  
 130.46  
 129.94  
 127.98

61.52  
 52.28  
 51.38  
 31.22  
 28.20  
 14.07

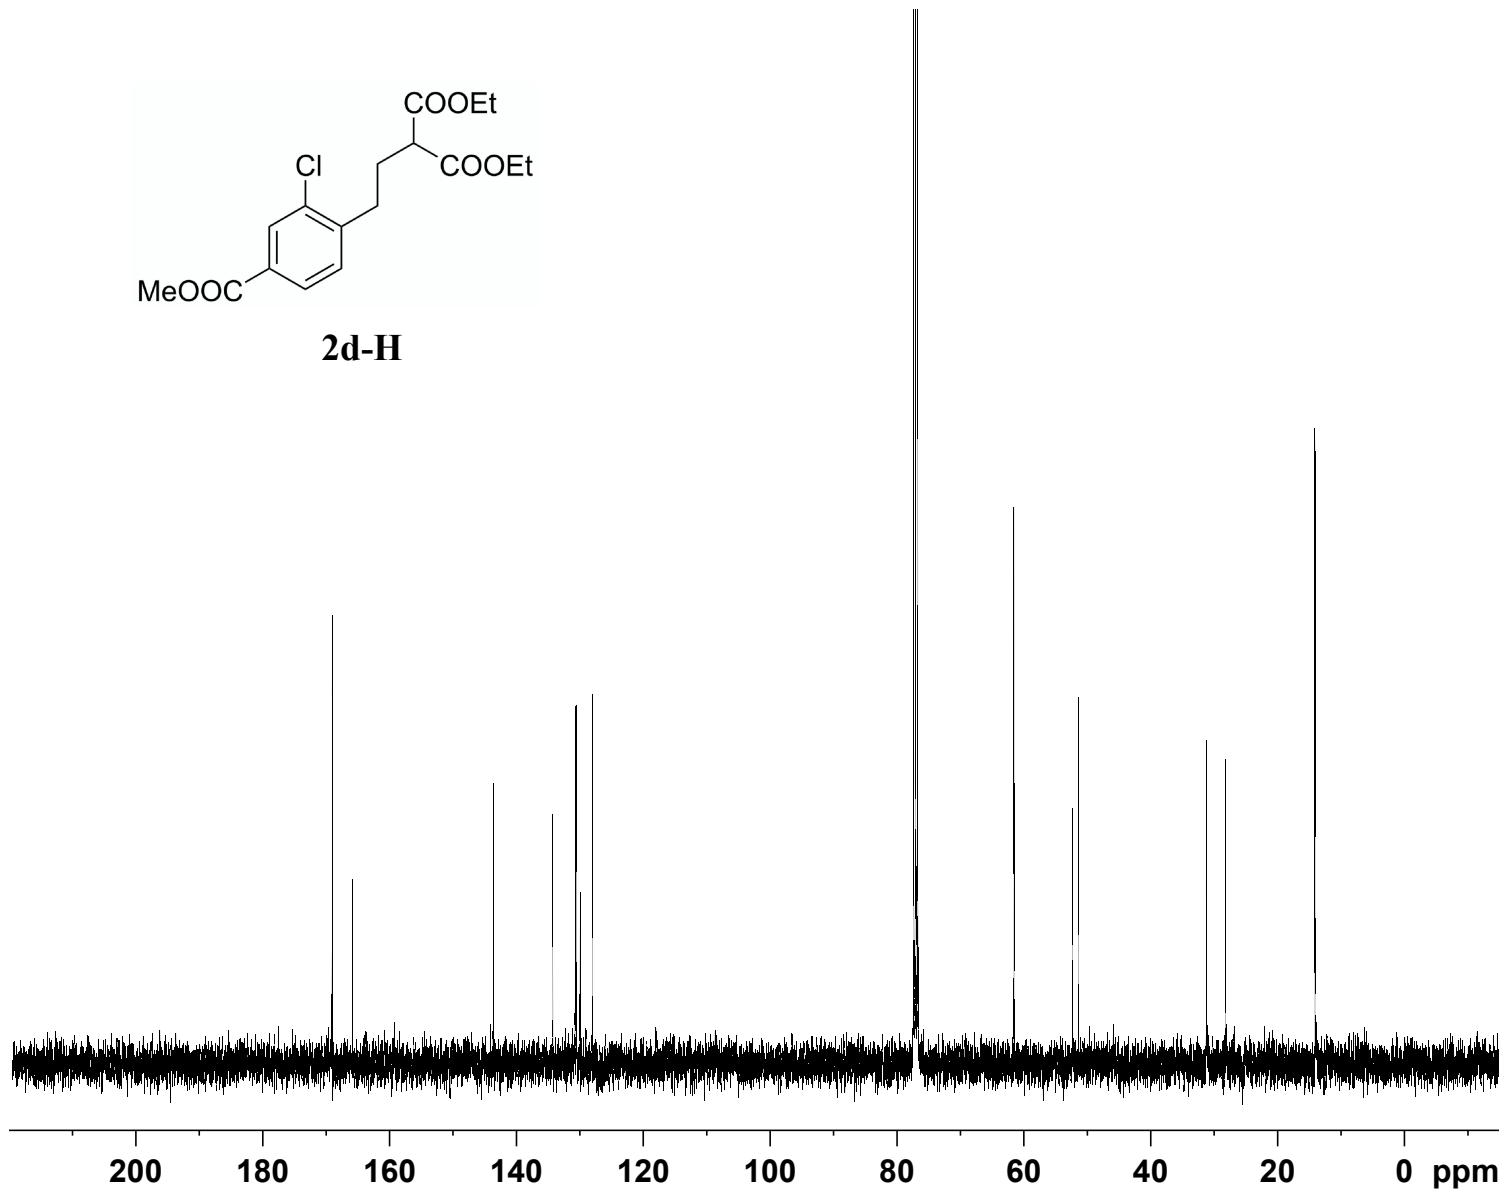

Current Data Parameters  
 NAME 400M-2022  
 EXPNO 10  
 PROCNO 1

F2 - Acquisition Parameters  
 Date\_ 20220701  
 Time 5.35  
 INSTRUM spect  
 PROBHD 5 mm PABBO BB/  
 PULPROG zgpg30  
 TD 65536  
 SOLVENT CDCl3  
 NS 256  
 DS 4  
 SWH 24038.461 Hz  
 FIDRES 0.366798 Hz  
 AQ 1.3631488 sec  
 RG 206.33  
 DW 20.800 usec  
 DE 6.50 usec  
 TE 301.7 K  
 D1 2.00000000 sec  
 D11 0.03000000 sec  
 TD0 1

===== CHANNEL f1 =====  
 SFO1 100.6504916 MHz  
 NUC1 13C  
 P1 10.00 usec  
 PLW1 54.00000000 W

===== CHANNEL f2 =====  
 SFO2 400.2416010 MHz  
 NUC2 1H  
 CPDPRG[2] waltz16  
 PCPD2 90.00 usec  
 PLW2 12.00000000 W  
 PLW12 0.30294999 W  
 PLW13 0.24539000 W

F2 - Processing parameters  
 SI 32768  
 SF 100.6404280 MHz  
 WDW EM  
 SSB 0  
 LB 1.00 Hz  
 GB 0  
 PC 1.40

8.300  
8.148  
8.132  
7.479  
7.463

4.245  
4.234  
4.231  
4.220  
4.217  
4.207  
4.203  
3.942  
3.434  
3.420  
3.405  
2.907  
2.886  
2.871  
2.854  
2.228  
2.213  
2.197  
1.301  
1.287  
1.273

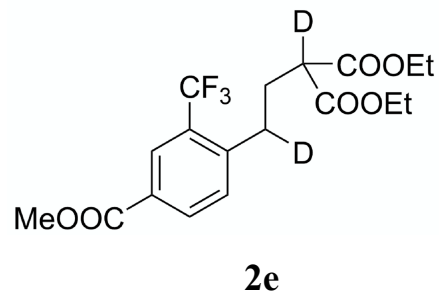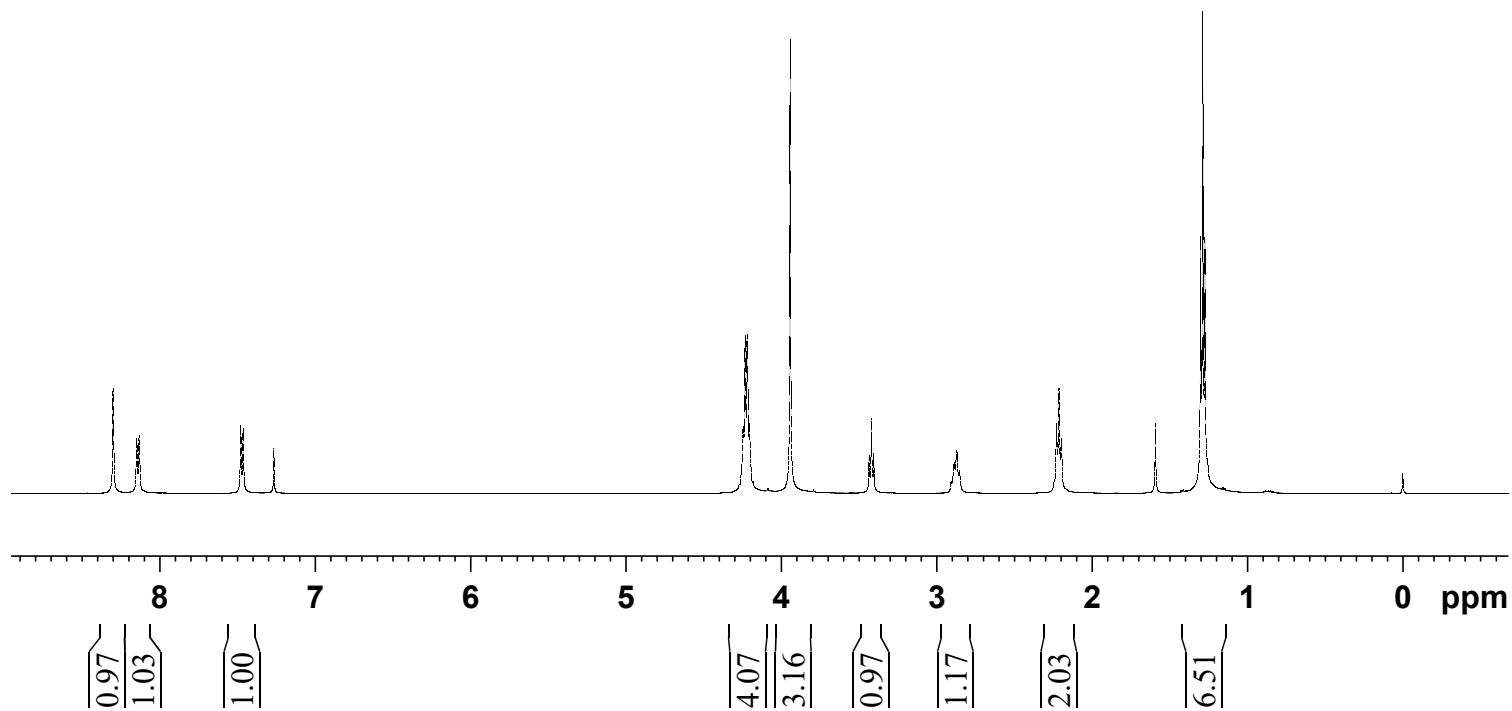

Current Data Parameters  
NAME 500M-2022  
EXPNO 59  
PROCNO 1

F2 - Acquisition Parameters  
Date\_ 20220324  
Time 22.19  
INSTRUM spect  
PROBHD 5 mm CPPBBO BB  
PULPROG zg30  
TD 65536  
SOLVENT CDCl3  
NS 16  
DS 2  
SWH 10000.000 Hz  
FIDRES 0.152588 Hz  
AQ 3.2767999 sec  
RG 31.72  
DW 50.000 usec  
DE 6.50 usec  
TE 298.2 K  
D1 1.00000000 sec  
D11 0 sec  
TD0 1

==== CHANNEL f1 =====  
SFO1 500.1330885 MHz  
NUC1 1H  
P1 11.25 usec  
PLW1 20.00000000 W

==== CHANNEL f2 =====  
SFO2 500.1330885 MHz  
NUC2 off  
CPDPRG[2]  
PCPD2 0 usec  
PLW2 0 W  
PLW12 0 W  
PLW13 0 W

F2 - Processing parameters  
SI 65536  
SF 500.1300096 MHz  
WDW EM  
SSB 0  
LB 0.30 Hz  
GB 0  
PC 1.00

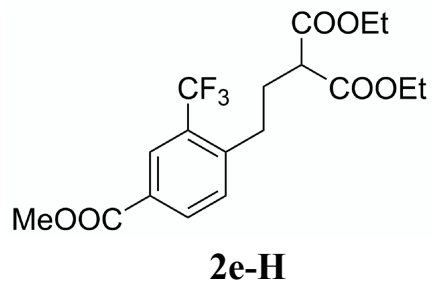

8.301  
8.150  
8.134  
7.481  
7.465

4.257  
4.250  
4.245  
4.236  
4.231  
4.221  
4.217  
4.207  
4.203  
3.943  
3.436  
3.421  
3.407  
2.908  
2.893  
2.876  
2.245  
2.230  
2.223  
2.213  
2.198  
1.302  
1.288  
1.273

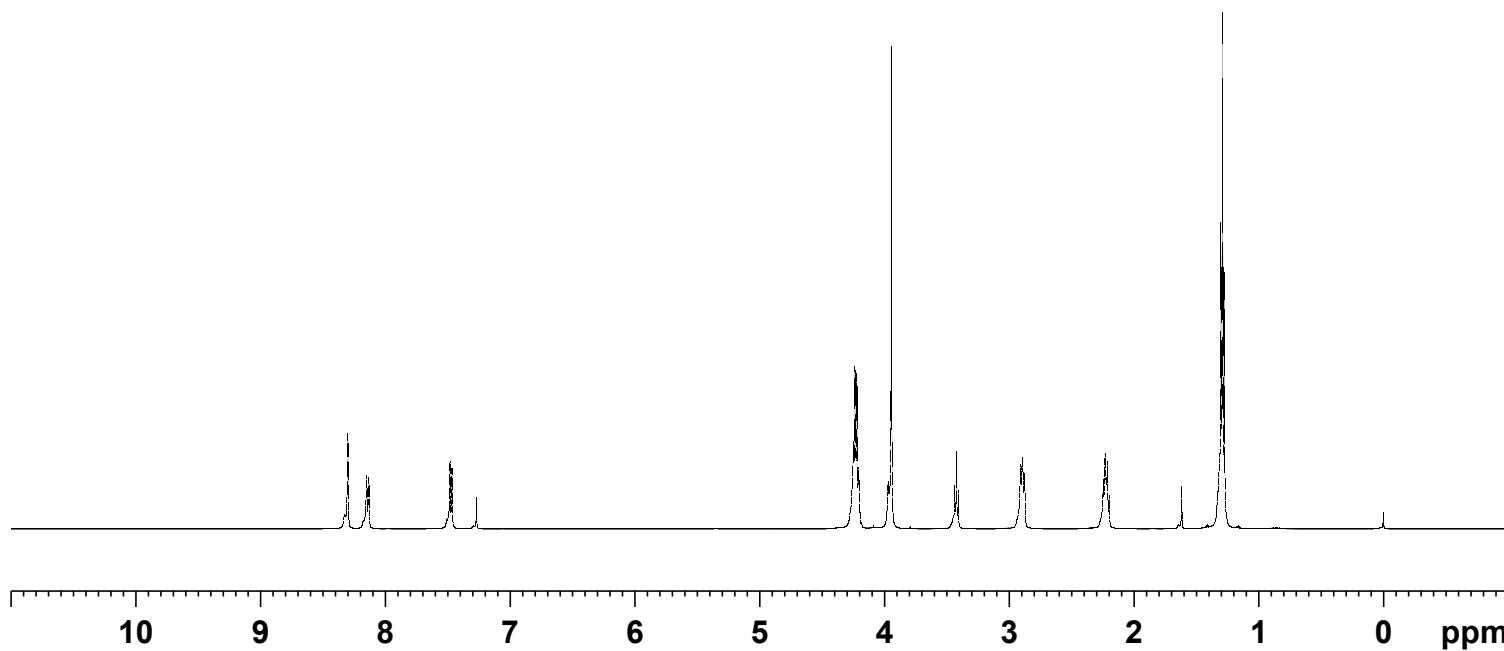

1.01  
1.00  
1.02

4.04  
3.05  
1.01  
2.03  
2.05  
6.22

Current Data Parameters  
NAME 500M-2022  
EXPNO 57  
PROCNO 1

F2 - Acquisition Parameters  
Date\_ 20220324  
Time 21.47  
INSTRUM spect  
PROBHD 5 mm CPPBBO BB  
PULPROG zg30  
TD 65536  
SOLVENT CDCl3  
NS 16  
DS 2  
SWH 10000.000 Hz  
FIDRES 0.152588 Hz  
AQ 3.2767999 sec  
RG 31.72  
DW 50.000 usec  
DE 6.50 usec  
TE 298.2 K  
D1 1.00000000 sec  
D11 0 sec  
TD0 1

==== CHANNEL f1 =====  
SFO1 500.1330885 MHz  
NUC1 1H  
P1 11.25 usec  
PLW1 20.00000000 W

==== CHANNEL f2 =====  
SFO2 500.1330885 MHz  
NUC2 off  
CPDPRG[2]  
PCPD2 0 usec  
PLW2 0 W  
PLW12 0 W  
PLW13 0 W

F2 - Processing parameters  
SI 65536  
SF 500.1300075 MHz  
WDW EM  
SSB 0  
LB 0.30 Hz  
GB 0  
PC 1.00

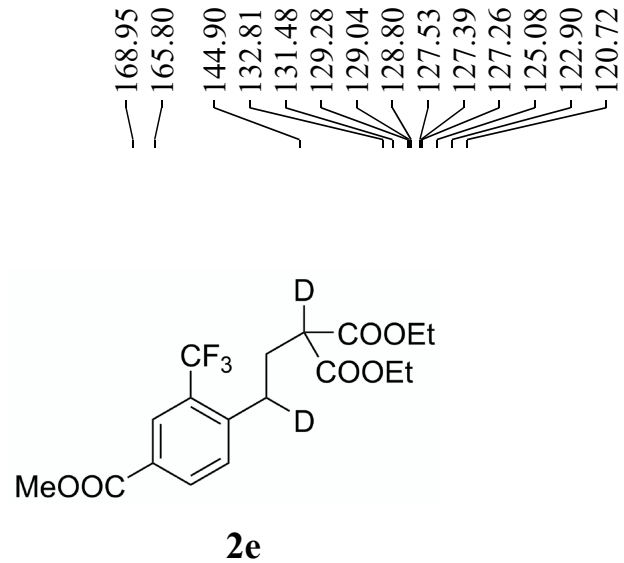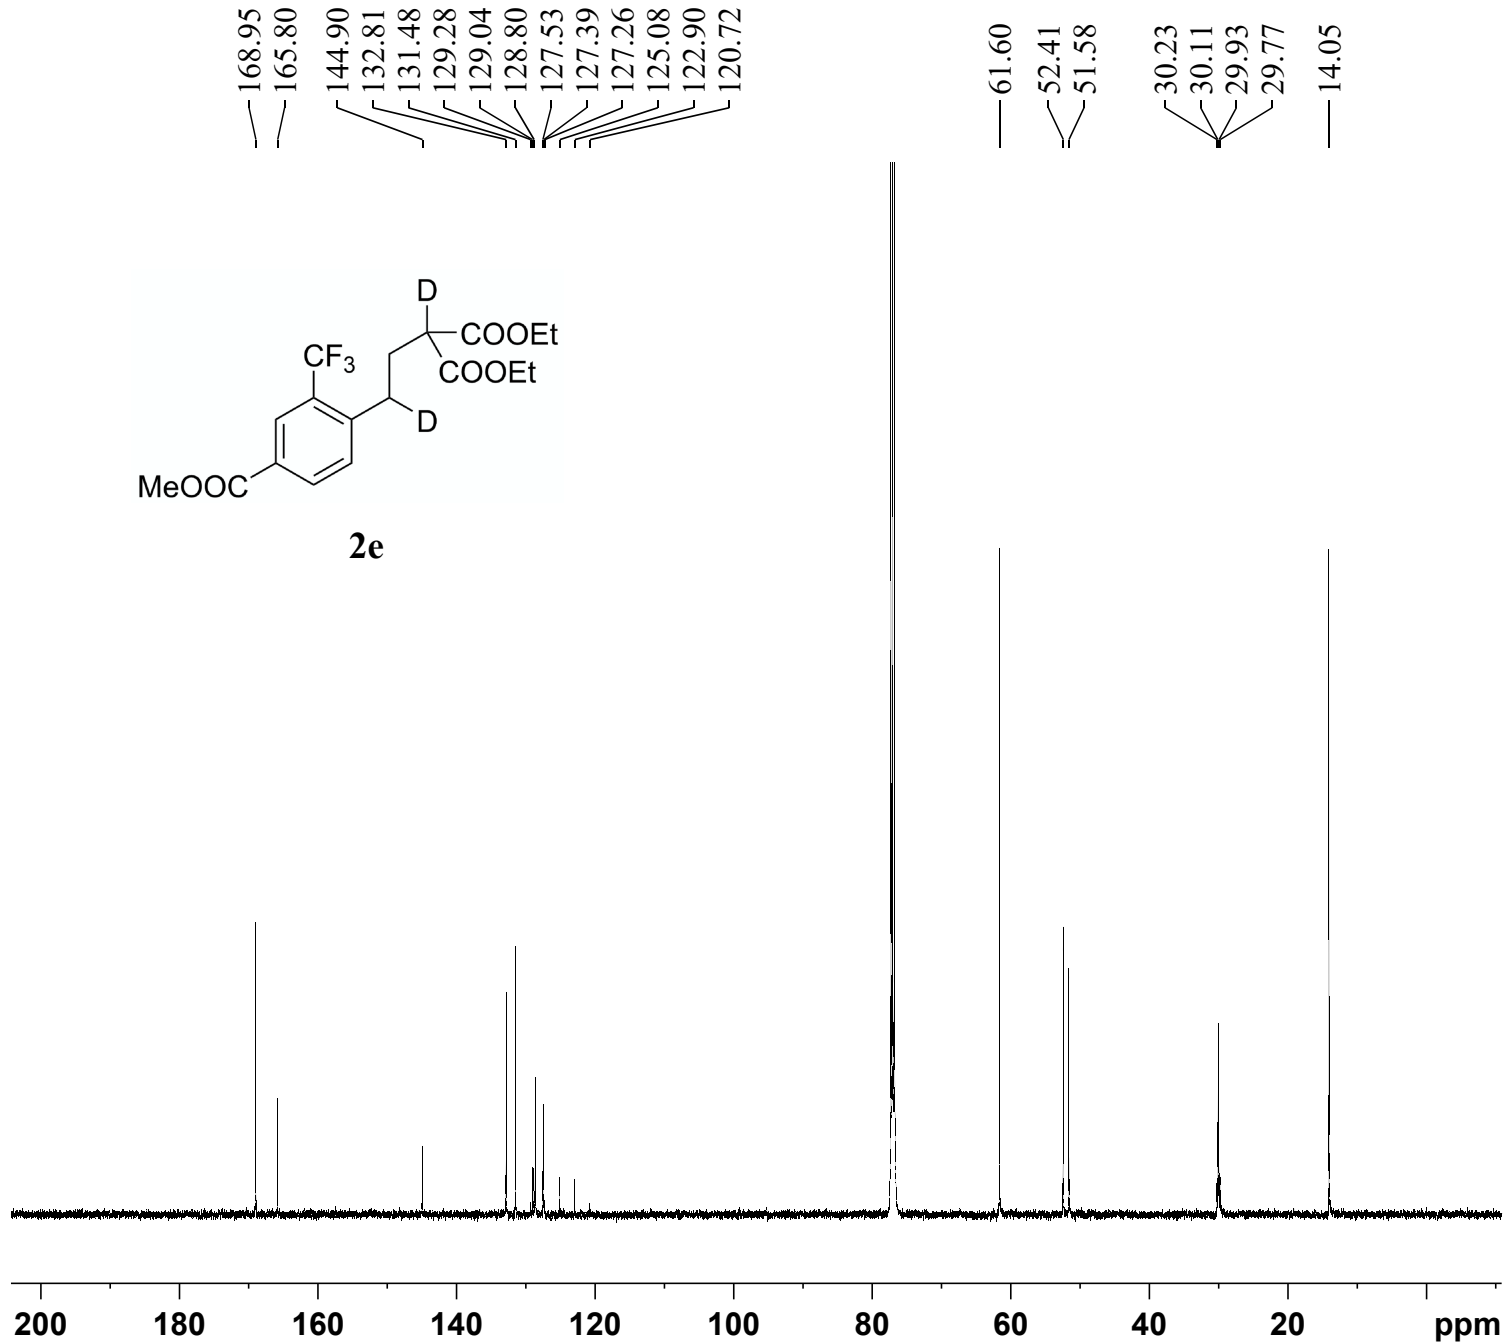

Current Data Parameters  
 NAME 500M-2022  
 EXPNO 60  
 PROCNO 1

F2 - Acquisition Parameters  
 Date\_ 20220324  
 Time 22.46  
 INSTRUM spect  
 PROBHD 5 mm CPPBBO BB  
 PULPROG zgpg30  
 TD 65536  
 SOLVENT CDCl3  
 NS 500  
 DS 4  
 SWH 29761.904 Hz  
 FIDRES 0.454131 Hz  
 AQ 1.1010048 sec  
 RG 192.89  
 DW 16.800 usec  
 DE 18.00 usec  
 TE 298.2 K  
 D1 2.00000000 sec  
 D11 0.03000000 sec  
 TD0 1

==== CHANNEL f1 =====  
 SFO1 125.7703637 MHz  
 NUC1 13C  
 P1 10.50 usec  
 PLW1 57.00000000 W

==== CHANNEL f2 =====  
 SFO2 500.1320005 MHz  
 NUC2 1H  
 CPDPRG[2] waltz16  
 PCPD2 80.00 usec  
 PLW2 20.00000000 W  
 PLW12 0.39550999 W  
 PLW13 0.25312999 W

F2 - Processing parameters  
 SI 32768  
 SF 125.7577885 MHz  
 WDW EM  
 SSB 0  
 LB 1.00 Hz  
 GB 0  
 PC 1.40

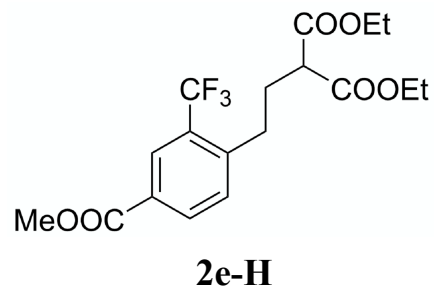

168.94  
 165.79  
 144.93  
 132.80  
 131.48  
 129.04  
 128.79  
 128.60  
 127.48  
 127.43  
 127.39  
 125.08  
 122.90

61.60  
 52.41  
 51.60  
 30.24  
 30.11  
 14.05

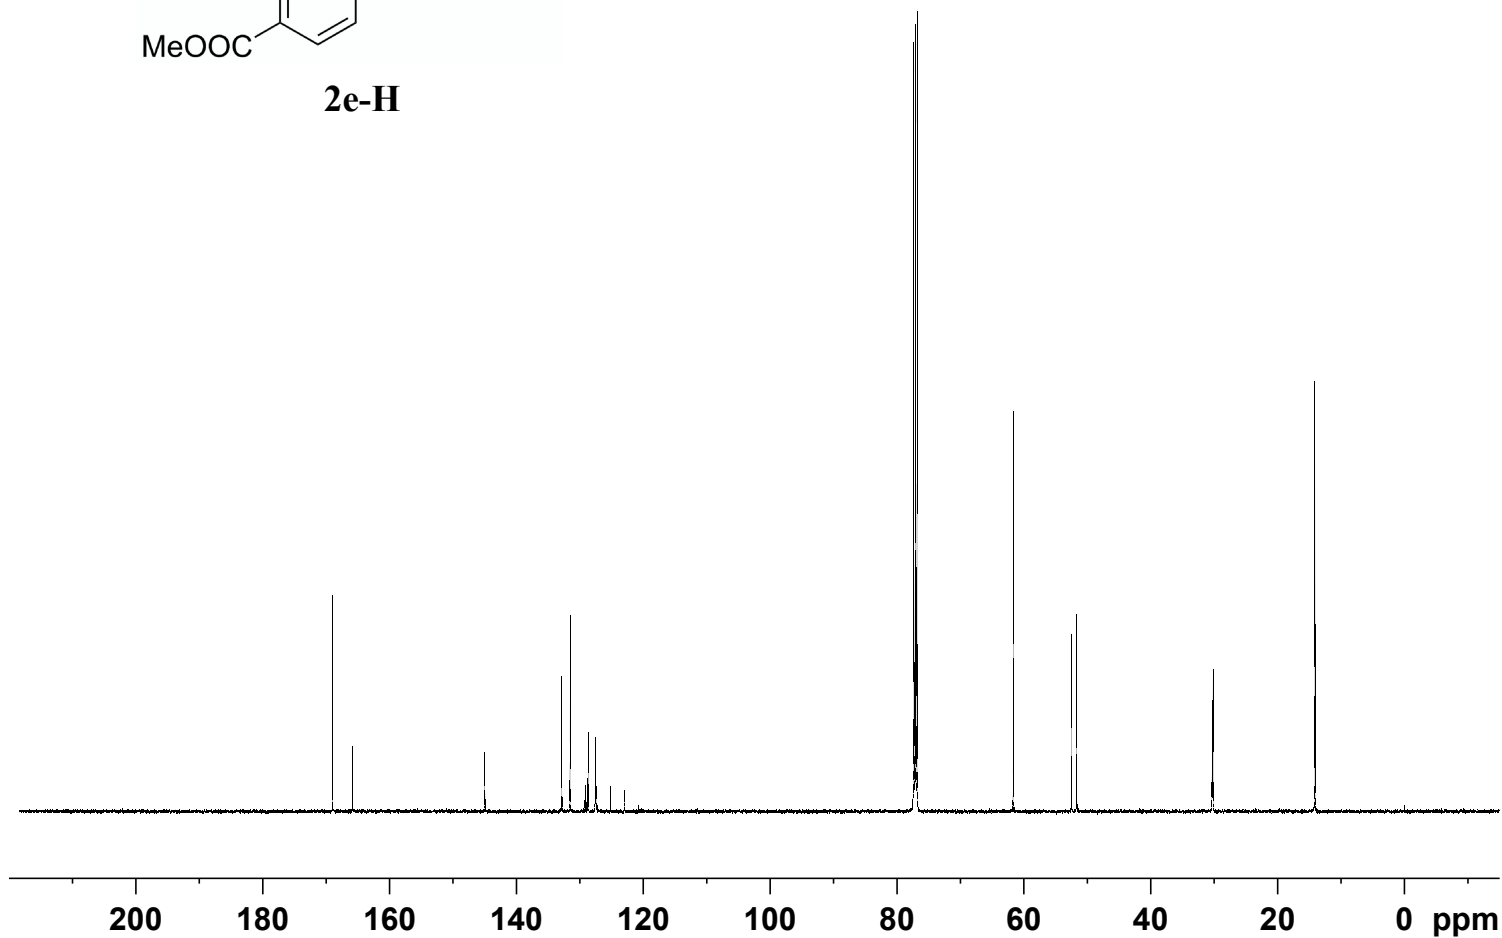

Current Data Parameters  
 NAME 500M-2022  
 EXPNO 58  
 PROCNO 1

F2 - Acquisition Parameters  
 Date\_ 20220324  
 Time 22.14  
 INSTRUM spect  
 PROBHD 5 mm CPPBBO BB  
 PULPROG zgpg30  
 TD 65536  
 SOLVENT CDCl3  
 NS 500  
 DS 4  
 SWH 29761.904 Hz  
 FIDRES 0.454131 Hz  
 AQ 1.1010048 sec  
 RG 192.89  
 DW 16.800 usec  
 DE 18.00 usec  
 TE 298.2 K  
 D1 2.00000000 sec  
 D11 0.03000000 sec  
 TD0 1

===== CHANNEL f1 =====  
 SFO1 125.7703637 MHz  
 NUC1 13C  
 P1 10.50 usec  
 PLW1 57.00000000 W

===== CHANNEL f2 =====  
 SFO2 500.1320005 MHz  
 NUC2 1H  
 CPDPRG[2] waltz16  
 PCPD2 80.00 usec  
 PLW2 20.00000000 W  
 PLW12 0.39550999 W  
 PLW13 0.25312999 W

F2 - Processing parameters  
 SI 32768  
 SF 125.7577885 MHz  
 WDW EM  
 SSB 0  
 LB 1.00 Hz  
 GB 0  
 PC 1.40

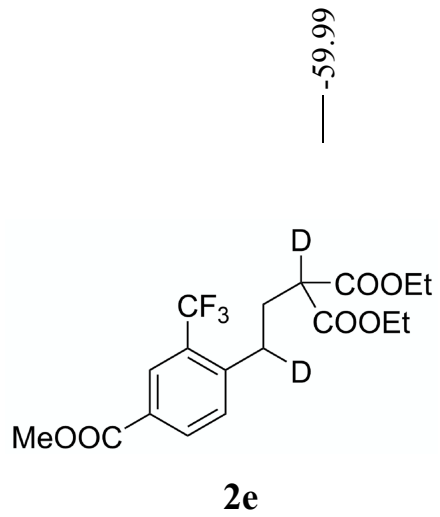

Current Data Parameters  
 NAME 400M-2023-F  
 EXPNO 5  
 PROCNO 1

F2 - Acquisition Parameters  
 Date\_ 20230506  
 Time 19.01  
 INSTRUM spect  
 PROBHD 5 mm PABBO BB/  
 PULPROG zgfhigqn.2  
 TD 131072  
 SOLVENT CDC13  
 NS 16  
 DS 4  
 SWH 89285.711 Hz  
 FIDRES 0.681196 Hz  
 AQ 0.7340032 sec  
 RG 206.33  
 DW 5.600 usec  
 DE 6.50 usec  
 TE 298.0 K  
 D1 1.00000000 sec  
 D11 0.03000000 sec  
 TD0 1

==== CHANNEL f1 =====  
 SFO1 376.5642094 MHz  
 NUC1 19F  
 P1 14.50 usec  
 PLW1 17.98900032 W

==== CHANNEL f2 =====  
 SFO2 400.2416010 MHz  
 NUC2 1H  
 CPDPRG[2] waltz16  
 PCPD2 90.00 usec  
 PLW2 12.00000000 W  
 PLW12 0.30294999 W  
 PLW13 0.24539000 W

F2 - Processing parameters  
 SI 65536  
 SF 376.6018696 MHz  
 WDW EM  
 SSB 0  
 LB 0.30 Hz  
 GB 0  
 PC 1.00

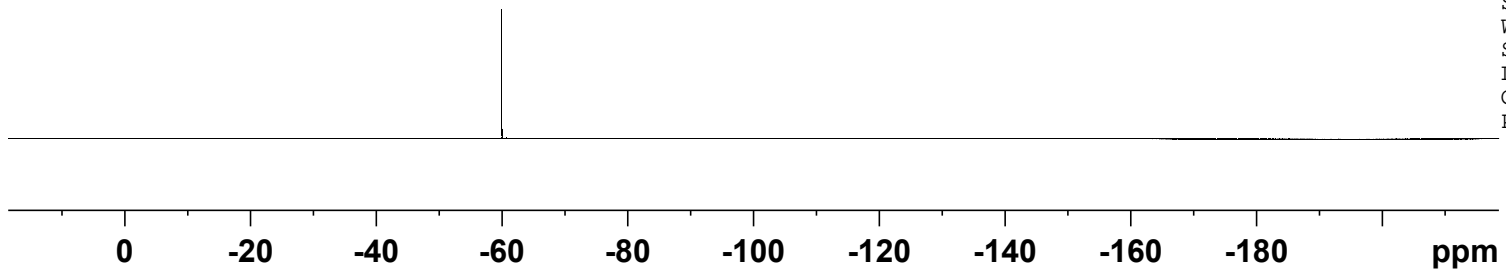

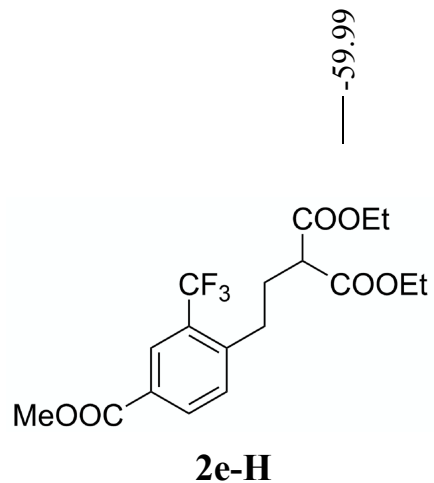

Current Data Parameters  
 NAME 400M-2023-F  
 EXPNO 4  
 PROCNO 1

F2 - Acquisition Parameters  
 Date\_ 20230506  
 Time 18.58  
 INSTRUM spect  
 PROBHD 5 mm PABBO BB/  
 PULPROG zgfhigqn.2  
 TD 131072  
 SOLVENT CDC13  
 NS 16  
 DS 4  
 SWH 89285.711 Hz  
 FIDRES 0.681196 Hz  
 AQ 0.7340032 sec  
 RG 206.33  
 DW 5.600 usec  
 DE 6.50 usec  
 TE 298.0 K  
 D1 1.00000000 sec  
 D11 0.03000000 sec  
 TD0 1

==== CHANNEL f1 =====  
 SFO1 376.5642094 MHz  
 NUC1 19F  
 P1 14.50 usec  
 PLW1 17.98900032 W

==== CHANNEL f2 =====  
 SFO2 400.2416010 MHz  
 NUC2 1H  
 CPDPRG[2] waltz16  
 PCPD2 90.00 usec  
 PLW2 12.00000000 W  
 PLW12 0.30294999 W  
 PLW13 0.24539000 W

F2 - Processing parameters  
 SI 65536  
 SF 376.6018696 MHz  
 WDW EM  
 SSB 0  
 LB 0.30 Hz  
 GB 0  
 PC 1.00

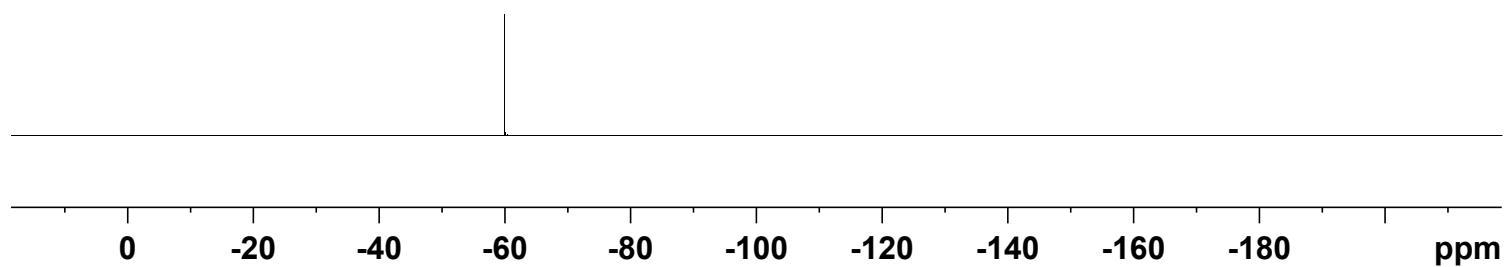



7.972  
7.969  
7.957  
7.953  
7.893  
7.891  
7.444  
7.431  
7.417  
7.402  
7.385  
7.379  
7.369  
7.350  
7.287  
7.273  
7.261  
4.121  
4.107  
4.093  
4.079  
3.899  
3.198  
3.183  
3.168  
2.695  
2.679  
2.662  
2.646  
2.062  
2.047  
2.031  
1.214  
1.200  
1.185

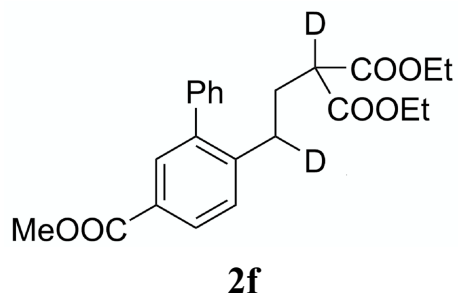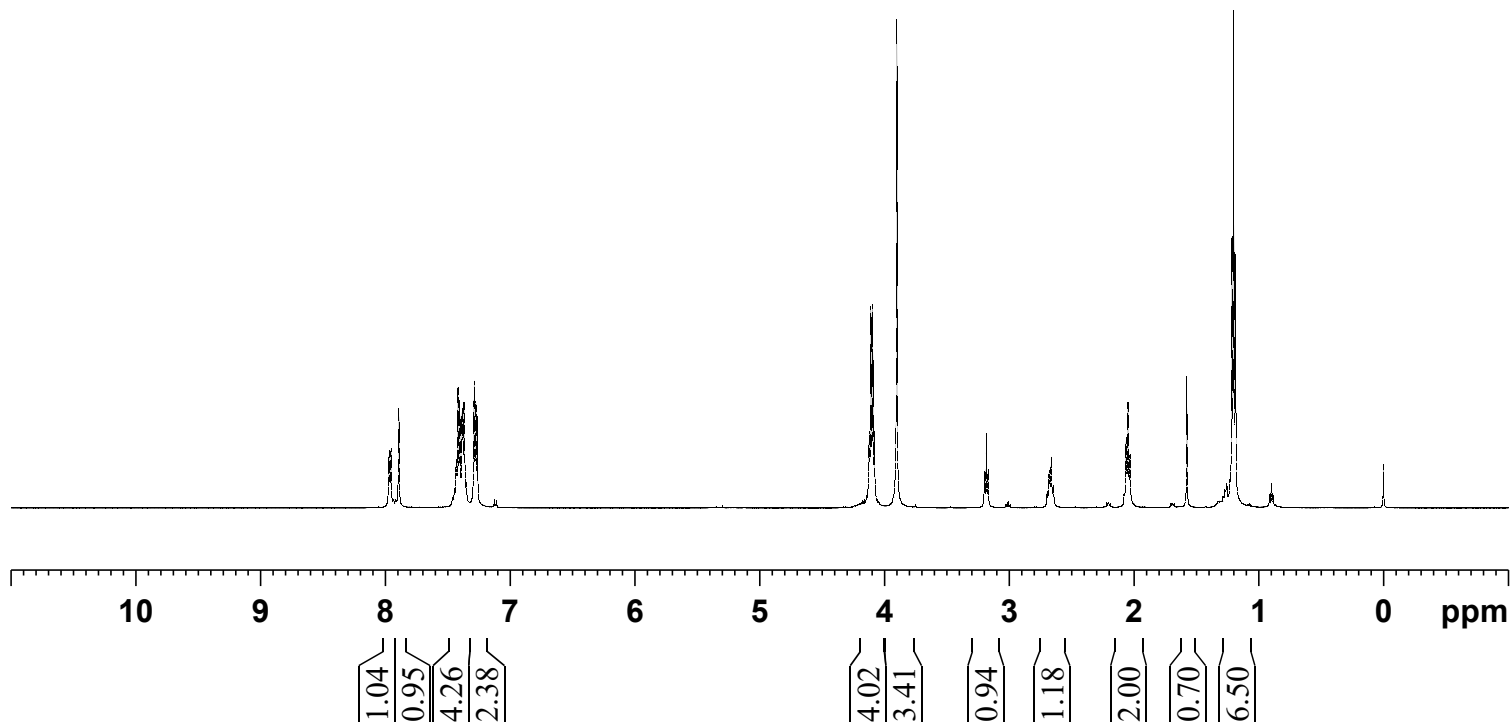

Current Data Parameters  
NAME 500M-2022  
EXPNO 51  
PROCNO 1

F2 - Acquisition Parameters  
Date\_ 20220315  
Time 10.33  
INSTRUM spect  
PROBHD 5 mm CPPBBO BB  
PULPROG zg30  
TD 65536  
SOLVENT CDCl3  
NS 16  
DS 2  
SWH 10000.000 Hz  
FIDRES 0.152588 Hz  
AQ 3.2767999 sec  
RG 31.72  
DW 50.000 usec  
DE 6.50 usec  
TE 298.2 K  
D1 1.00000000 sec  
D11 0 sec  
TD0 1

==== CHANNEL f1 =====  
SFO1 500.1330885 MHz  
NUC1 1H  
P1 11.25 usec  
PLW1 20.00000000 W

==== CHANNEL f2 =====  
SFO2 500.1330885 MHz  
NUC2 off  
CPDPRG[2]  
PCPD2 0 usec  
PLW2 0 W  
PLW12 0 W  
PLW13 0 W

F2 - Processing parameters  
SI 65536  
SF 500.1300117 MHz  
WDW EM  
SSB 0  
LB 0.30 Hz  
GB 0  
PC 1.00

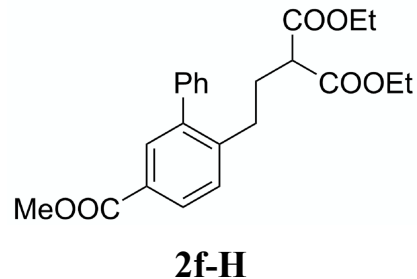

7.970  
7.954  
7.891  
7.431  
7.417  
7.402  
7.386  
7.379  
7.370  
7.350  
7.288  
7.273  
7.262

4.122  
4.108  
4.094  
4.080  
3.899  
3.199  
3.184  
3.170  
2.696  
2.680  
2.664  
2.079  
2.063  
2.047  
2.032  
1.214  
1.200  
1.186

Current Data Parameters  
 NAME 500M-2022  
 EXPNO 44  
 PROCNO 1

F2 - Acquisition Parameters  
 Date\_ 20220315  
 Time 6.46  
 INSTRUM spect  
 PROBHD 5 mm CPPBBO BB  
 PULPROG zg30  
 TD 65536  
 SOLVENT CDCl3  
 NS 16  
 DS 2  
 SWH 10000.000 Hz  
 FIDRES 0.152588 Hz  
 AQ 3.2767999 sec  
 RG 31.72  
 DW 50.000 usec  
 DE 6.50 usec  
 TE 298.2 K  
 D1 1.00000000 sec  
 D11 0 sec  
 TD0 1

==== CHANNEL f1 =====  
 SFO1 500.1330885 MHz  
 NUC1 1H  
 P1 11.25 usec  
 PLW1 20.00000000 W

==== CHANNEL f2 =====  
 SFO2 500.1330885 MHz  
 NUC2 off  
 CPDPRG[2]  
 PCPD2 0 usec  
 PLW2 0 W  
 PLW12 0 W  
 PLW13 0 W

F2 - Processing parameters  
 SI 65536  
 SF 500.1300115 MHz  
 WDW EM  
 SSB 0  
 LB 0.30 Hz  
 GB 0  
 PC 1.00

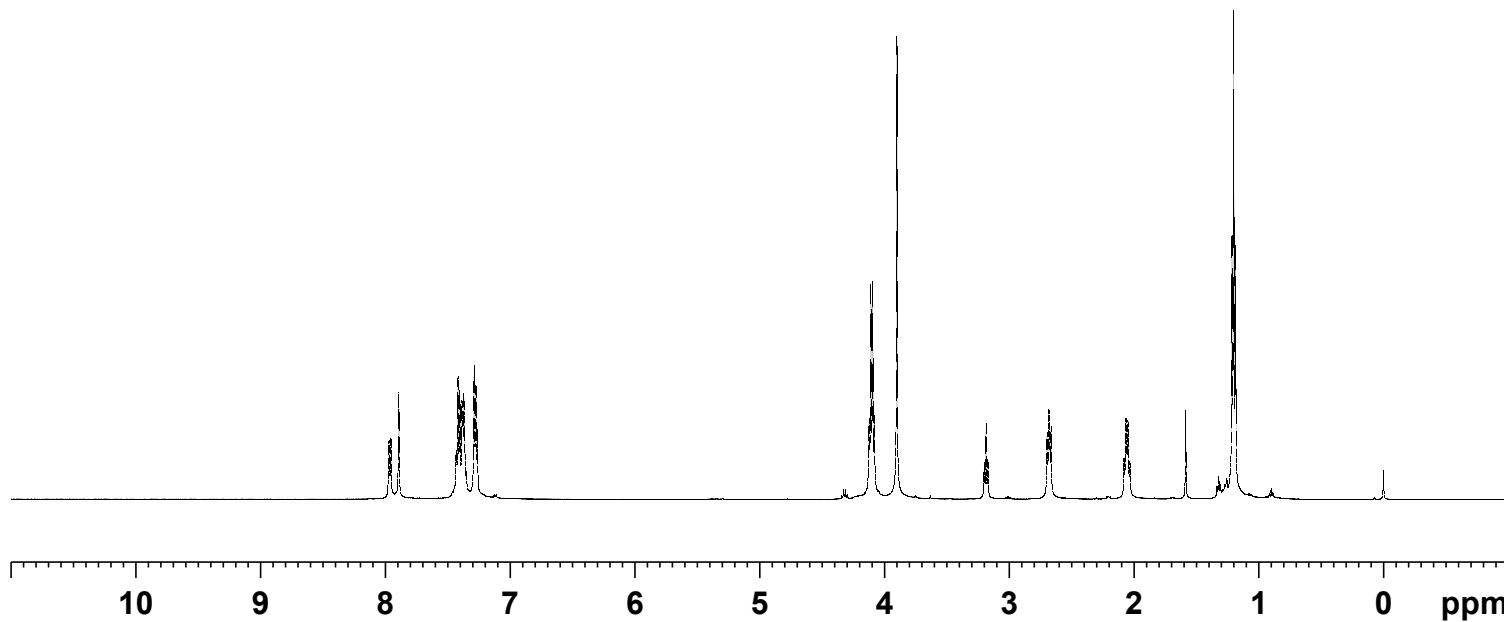

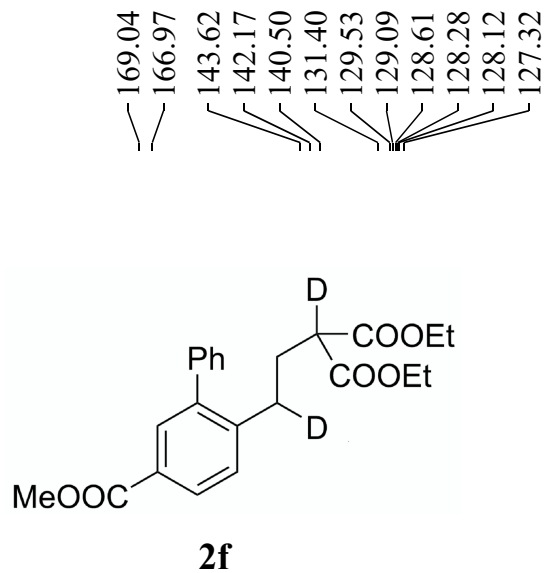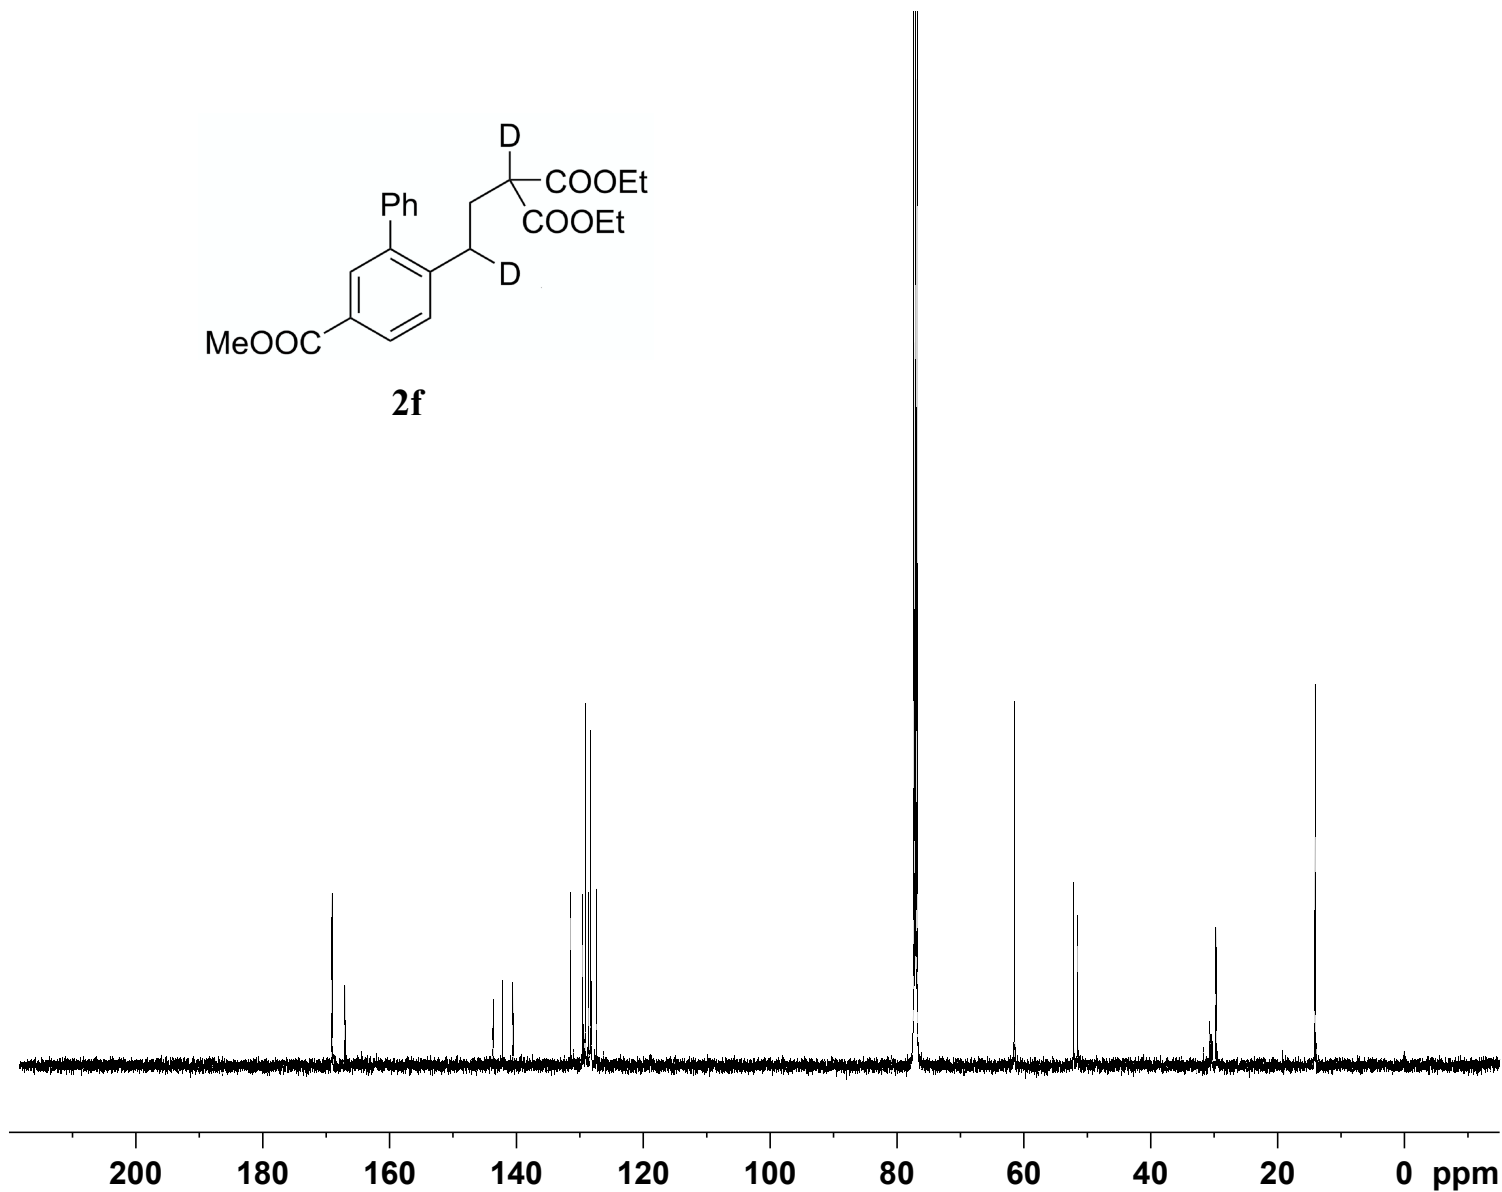

Current Data Parameters  
 NAME 500M-2022  
 EXPNO 49  
 PROCNO 1

F2 - Acquisition Parameters  
 Date\_ 20220315  
 Time 7.33  
 INSTRUM spect  
 PROBHD 5 mm CPPBBO BB  
 PULPROG zgpg30  
 TD 65536  
 SOLVENT CDCl3  
 NS 300  
 DS 4  
 SWH 29761.904 Hz  
 FIDRES 0.454131 Hz  
 AQ 1.1010048 sec  
 RG 192.89  
 DW 16.800 usec  
 DE 18.00 usec  
 TE 298.2 K  
 D1 2.00000000 sec  
 D11 0.03000000 sec  
 TD0 1

==== CHANNEL f1 =====  
 SFO1 125.7703637 MHz  
 NUC1 13C  
 P1 10.50 usec  
 PLW1 57.00000000 W

==== CHANNEL f2 =====  
 SFO2 500.1320005 MHz  
 NUC2 1H  
 CPDPRG[2] waltz16  
 PCPD2 80.00 usec  
 PLW2 20.00000000 W  
 PLW12 0.39550999 W  
 PLW13 0.25312999 W

F2 - Processing parameters  
 SI 32768  
 SF 125.7577885 MHz  
 WDW EM  
 SSB 0  
 LB 1.00 Hz  
 GB 0  
 PC 1.40

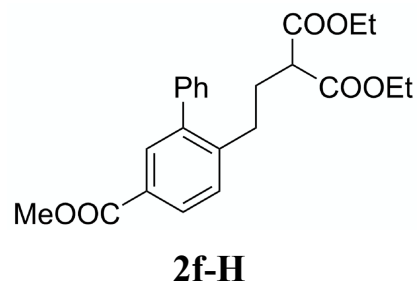

169.03  
 166.97  
 143.66  
 142.17  
 140.50  
 131.40  
 129.53  
 129.09  
 128.61  
 128.28  
 128.12  
 127.32

61.38  
 52.07  
 51.47  
 30.68  
 29.71  
 14.02

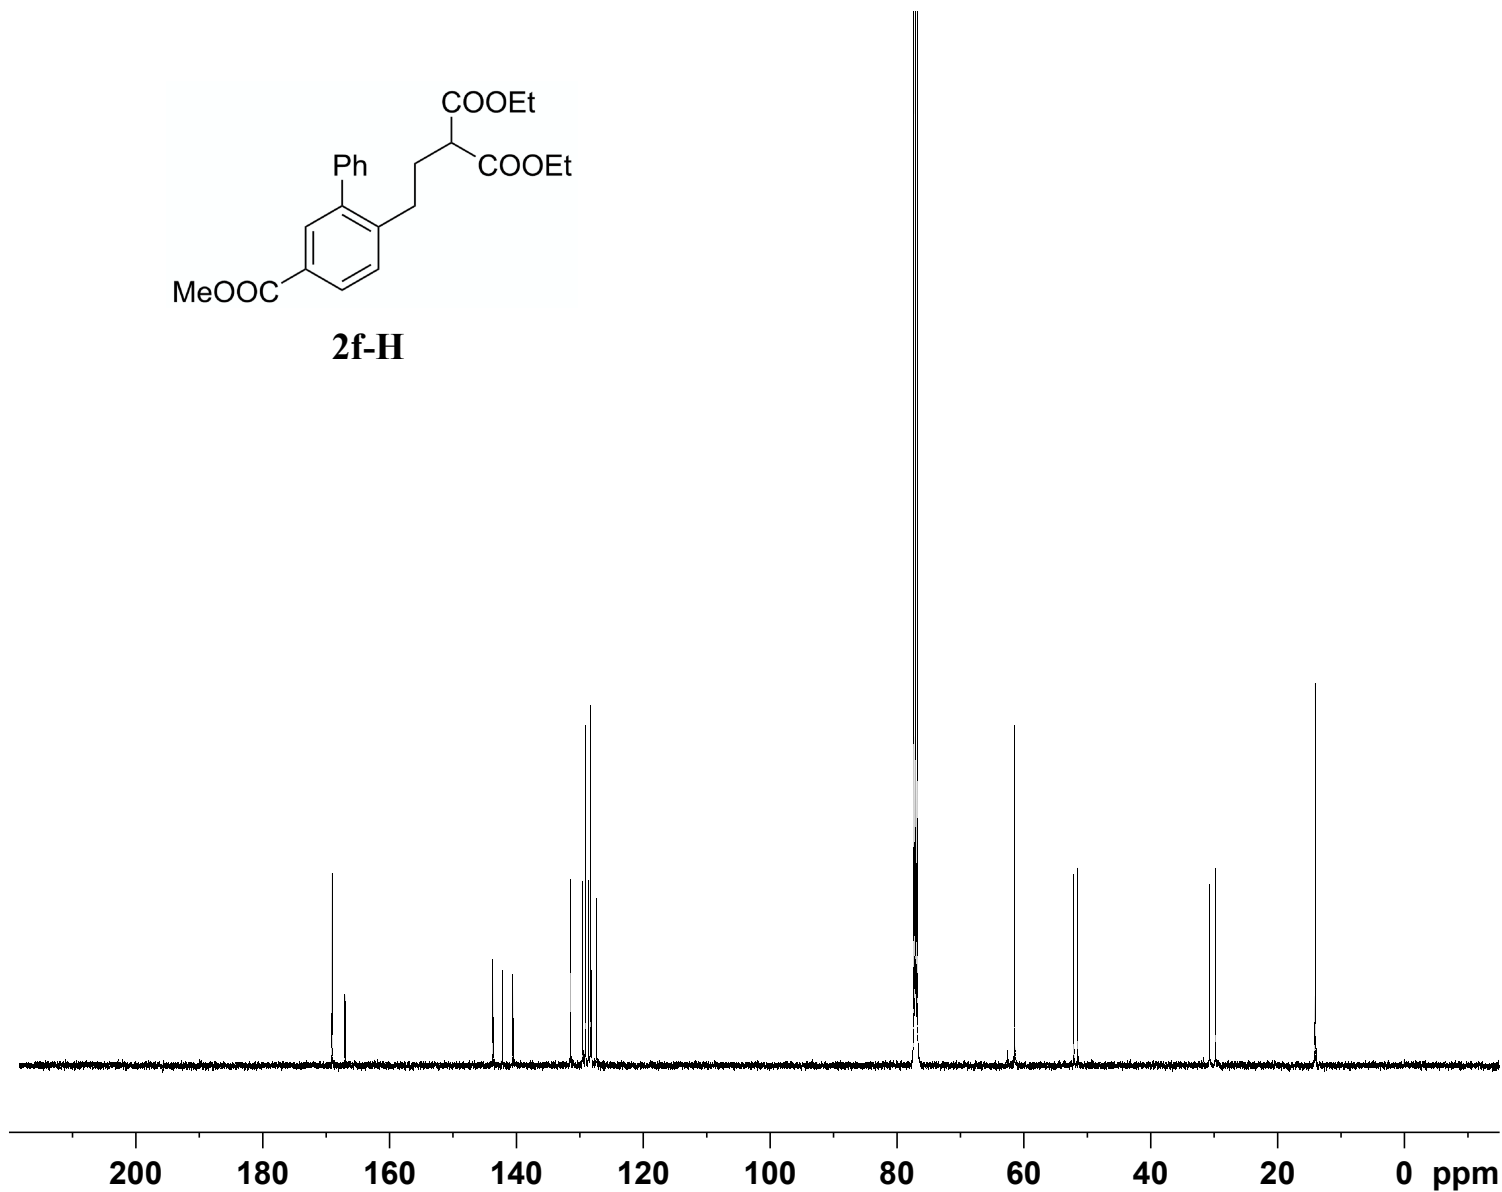

Current Data Parameters  
 NAME 500M-2022  
 EXPNO 46  
 PROCNO 1

F2 - Acquisition Parameters  
 Date\_ 20220315  
 Time 7.07  
 INSTRUM spect  
 PROBHD 5 mm CPPBBO BB  
 PULPROG zgpg30  
 TD 65536  
 SOLVENT CDCl3  
 NS 300  
 DS 4  
 SWH 29761.904 Hz  
 FIDRES 0.454131 Hz  
 AQ 1.1010048 sec  
 RG 192.89  
 DW 16.800 usec  
 DE 18.00 usec  
 TE 298.2 K  
 D1 2.00000000 sec  
 D11 0.03000000 sec  
 TD0 1

===== CHANNEL f1 =====  
 SFO1 125.7703637 MHz  
 NUC1 13C  
 P1 10.50 usec  
 PLW1 57.00000000 W

===== CHANNEL f2 =====  
 SFO2 500.1320005 MHz  
 NUC2 1H  
 CPDPRG[2] waltz16  
 PCPD2 80.00 usec  
 PLW2 20.00000000 W  
 PLW12 0.39550999 W  
 PLW13 0.25312999 W

F2 - Processing parameters  
 SI 32768  
 SF 125.7577885 MHz  
 WDW EM  
 SSB 0  
 LB 1.00 Hz  
 GB 0  
 PC 1.40

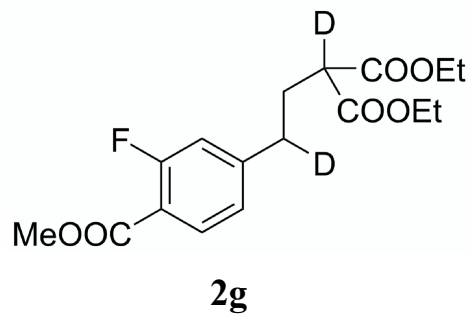

7.880  
7.865  
7.849  
7.041  
7.039  
7.023  
6.987  
6.964  
4.231  
4.226  
4.218  
4.213  
4.203  
4.199  
4.190  
4.185  
4.178  
3.919  
3.329  
3.314  
3.299  
2.718  
2.702  
2.686  
2.670  
2.242  
2.226  
2.211  
2.196  
1.292  
1.277  
1.263

Current Data Parameters  
NAME 500M-2022  
EXPNO 5  
PROCNO 1

F2 - Acquisition Parameters  
Date\_ 20220216  
Time 23.37  
INSTRUM spect  
PROBHD 5 mm CPPBBO BB  
PULPROG zg30  
TD 65536  
SOLVENT CDCl3  
NS 16  
DS 2  
SWH 10000.000 Hz  
FIDRES 0.152588 Hz  
AQ 3.2767999 sec  
RG 62.06  
DW 50.000 usec  
DE 6.50 usec  
TE 298.2 K  
D1 1.00000000 sec  
D11 0 sec  
TD0 1

==== CHANNEL f1 =====  
SFO1 500.1330885 MHz  
NUC1 1H  
P1 11.25 usec  
PLW1 20.00000000 W

==== CHANNEL f2 =====  
SFO2 500.1330885 MHz  
NUC2 off  
CPDPRG[2]  
PCPD2 0 usec  
PLW2 0 W  
PLW12 0 W  
PLW13 0 W

F2 - Processing parameters  
SI 65536  
SF 500.1300117 MHz  
WDW EM  
SSB 0  
LB 0.30 Hz  
GB 0  
PC 1.00

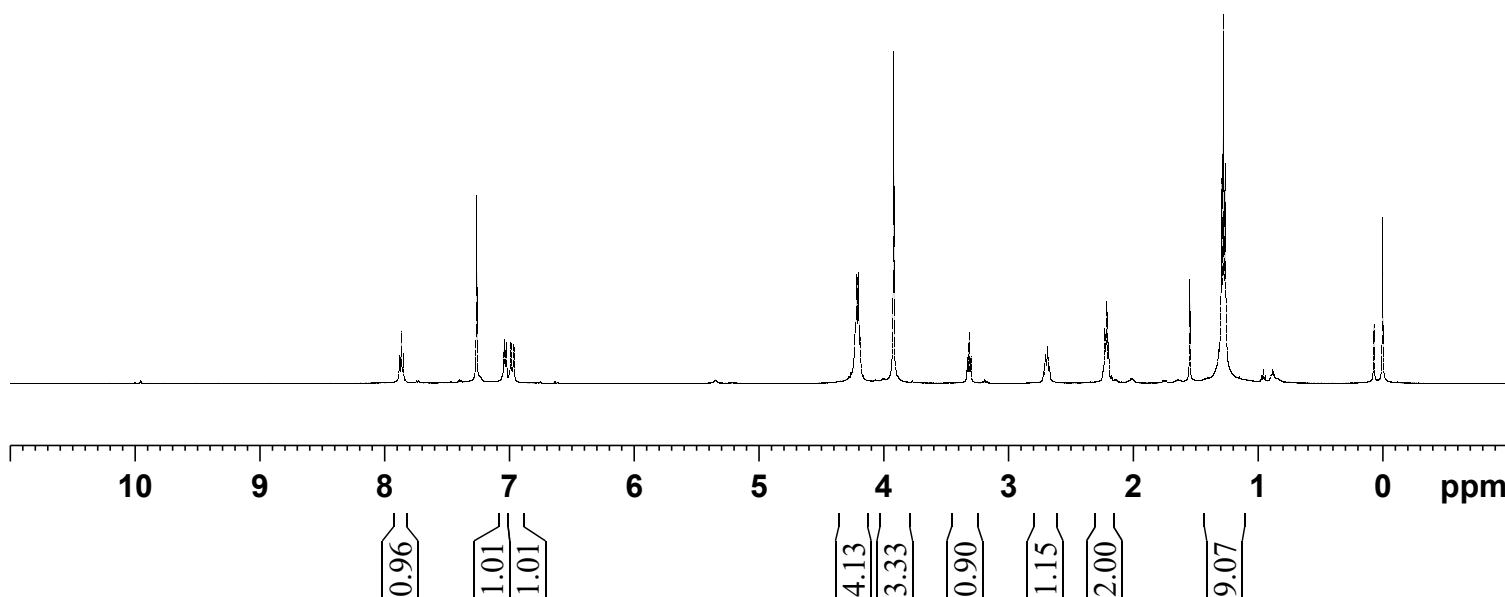

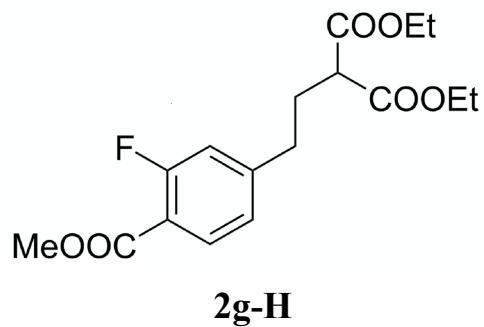

7.880  
7.865  
7.849  
7.039  
7.023  
6.987  
6.964

4.227  
4.218  
4.214  
4.204  
4.199  
4.190  
3.919  
3.330  
3.315  
3.300  
2.718  
2.703  
2.687  
2.242  
2.227  
2.211  
2.196  
1.292  
1.278  
1.263

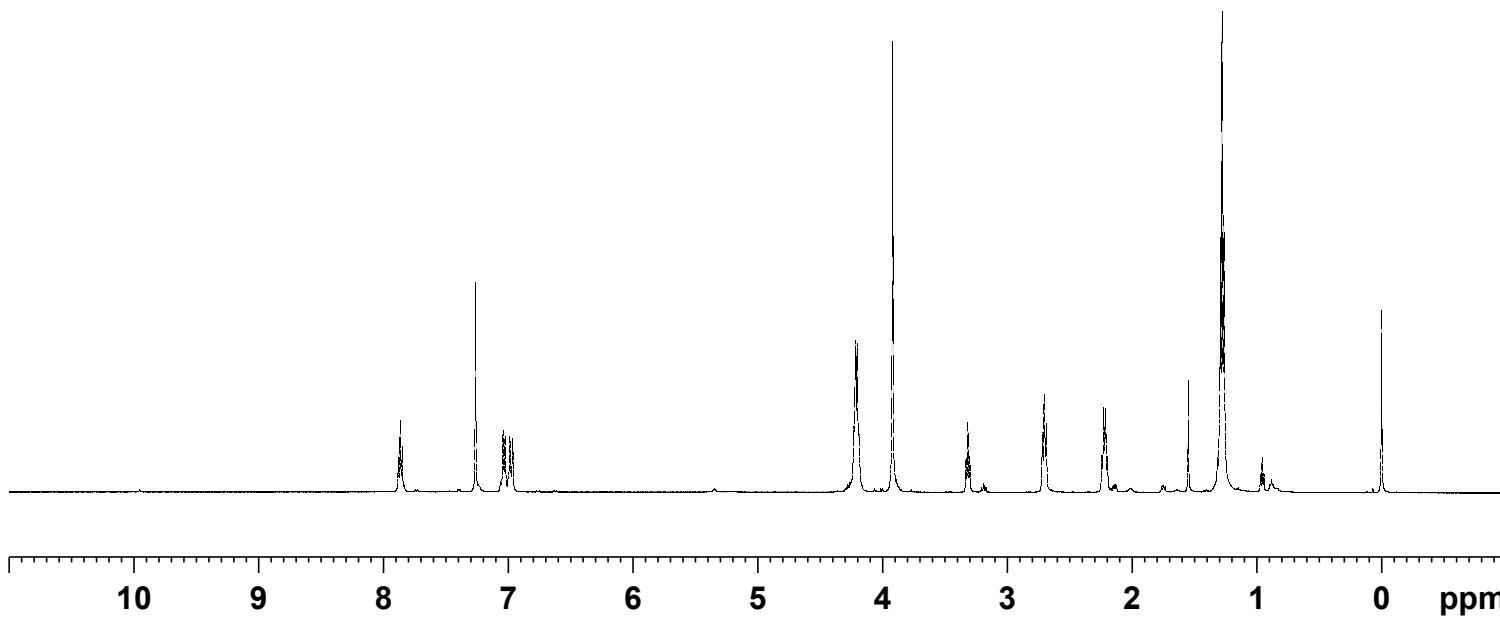

1.54  
1.45  
1.47

5.10  
4.47  
1.36  
2.42  
2.42  
9.22

Current Data Parameters  
NAME 500M-2022  
EXPNO 3  
PROCNO 1

F2 - Acquisition Parameters  
Date\_ 20220216  
Time 22.38  
INSTRUM spect  
PROBHD 5 mm CPPBBO BB  
PULPROG zg30  
TD 65536  
SOLVENT CDCl3  
NS 16  
DS 2  
SWH 10000.000 Hz  
FIDRES 0.152588 Hz  
AQ 3.2767999 sec  
RG 62.06  
DW 50.000 usec  
DE 6.50 usec  
TE 298.2 K  
D1 1.00000000 sec  
D11 0 sec  
TD0 1

==== CHANNEL f1 =====  
SFO1 500.1330885 MHz  
NUC1 1H  
P1 11.25 usec  
PLW1 20.00000000 W

==== CHANNEL f2 =====  
SFO2 500.1330885 MHz  
NUC2 off  
CPDPRG[2]  
PCPD2 0 usec  
PLW2 0 W  
PLW12 0 W  
PLW13 0 W

F2 - Processing parameters  
SI 65536  
SF 500.1300118 MHz  
WDW EM  
SSB 0  
LB 0.30 Hz  
GB 0  
PC 1.00

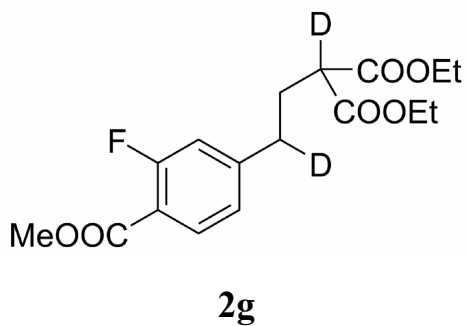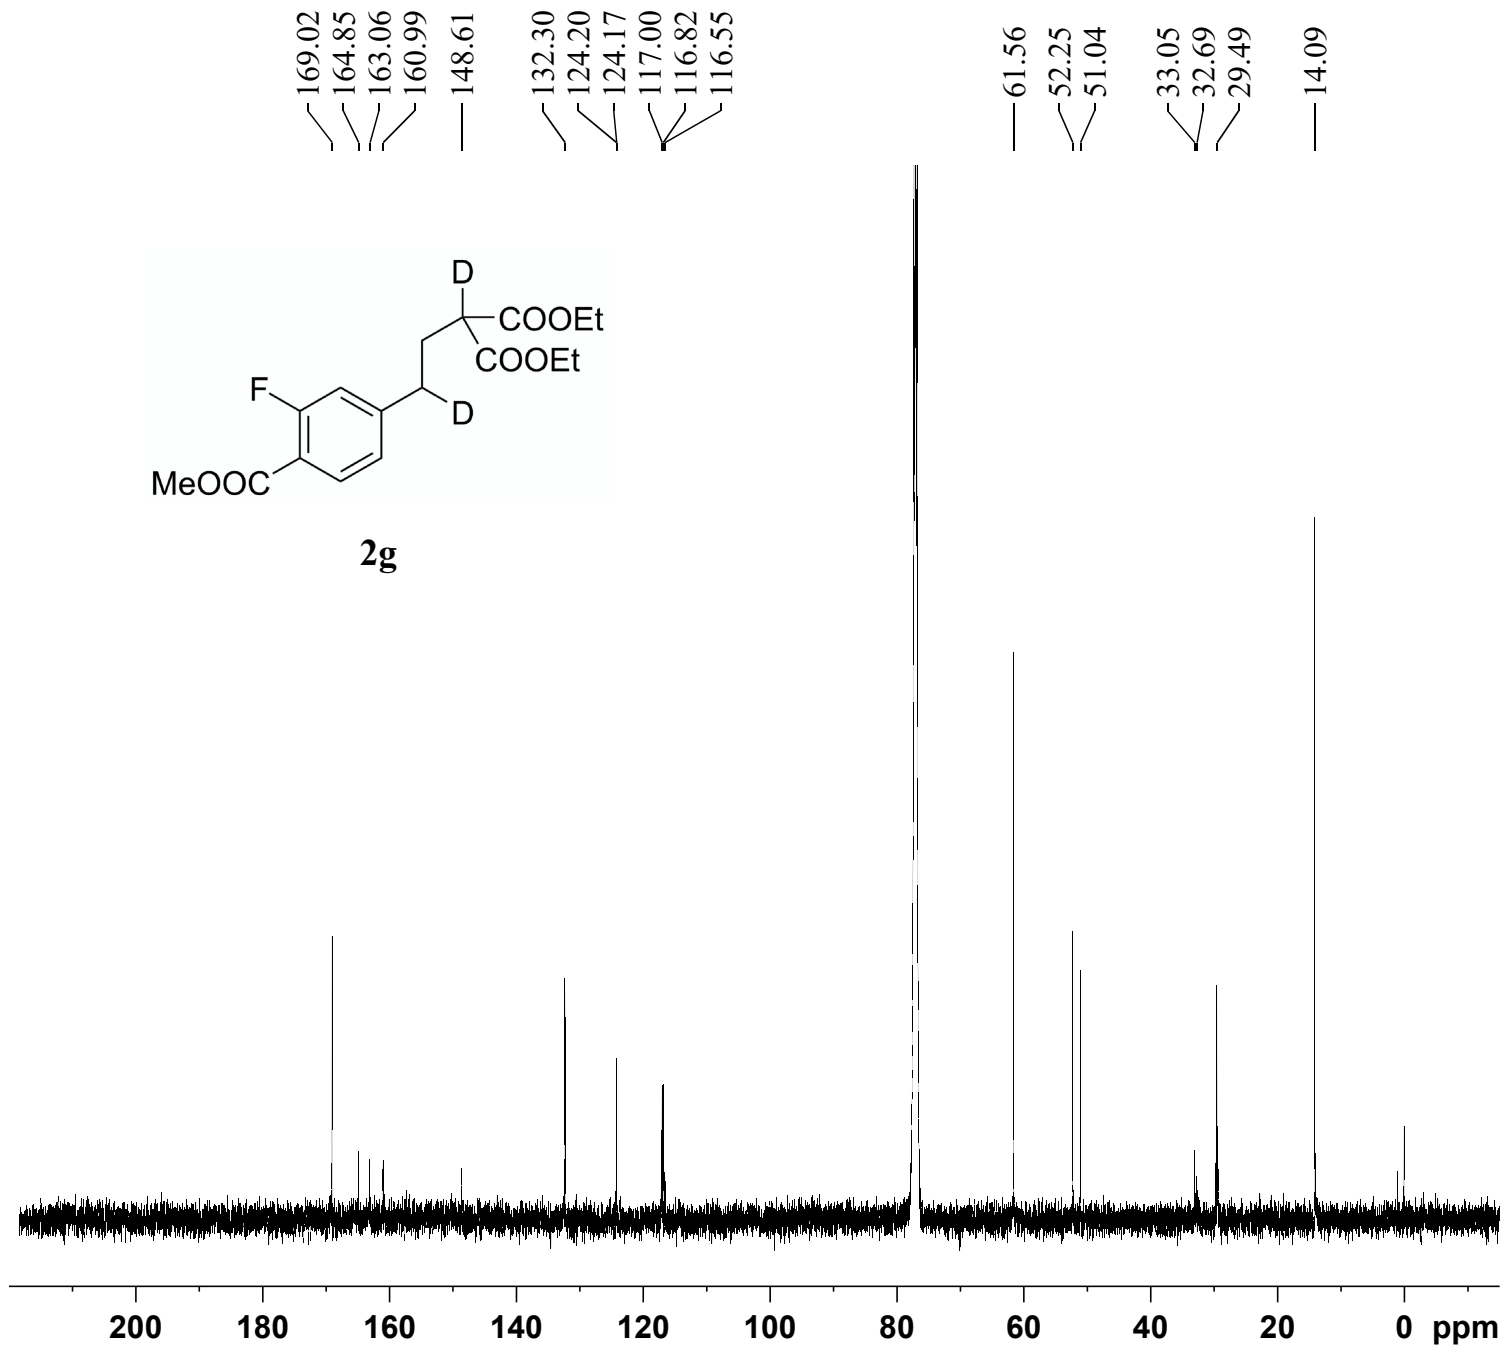

Current Data Parameters  
 NAME 500M-2022  
 EXPNO 6  
 PROCNO 1

F2 - Acquisition Parameters  
 Date\_ 20220217  
 Time 0.32  
 INSTRUM spect  
 PROBHD 5 mm CPPBBO BB  
 PULPROG zgpg30  
 TD 65536  
 SOLVENT CDCl3  
 NS 1024  
 DS 4  
 SWH 29761.904 Hz  
 FIDRES 0.454131 Hz  
 AQ 1.1010048 sec  
 RG 192.89  
 DW 16.800 usec  
 DE 18.00 usec  
 TE 298.2 K  
 D1 2.0000000 sec  
 D11 0.0300000 sec  
 TD0 1

==== CHANNEL f1 =====  
 SFO1 125.7703637 MHz  
 NUC1 13C  
 P1 10.50 usec  
 PLW1 57.0000000 W

==== CHANNEL f2 =====  
 SFO2 500.1320005 MHz  
 NUC2 1H  
 CPDPRG[2] waltz16  
 PCPD2 80.00 usec  
 PLW2 20.0000000 W  
 PLW12 0.39550999 W  
 PLW13 0.25312999 W

F2 - Processing parameters  
 SI 32768  
 SF 125.7577885 MHz  
 WDW EM  
 SSB 0  
 LB 1.00 Hz  
 GB 0  
 PC 1.40

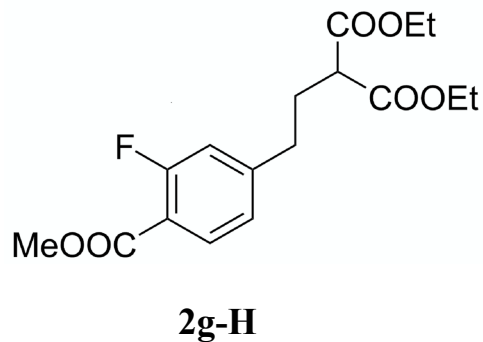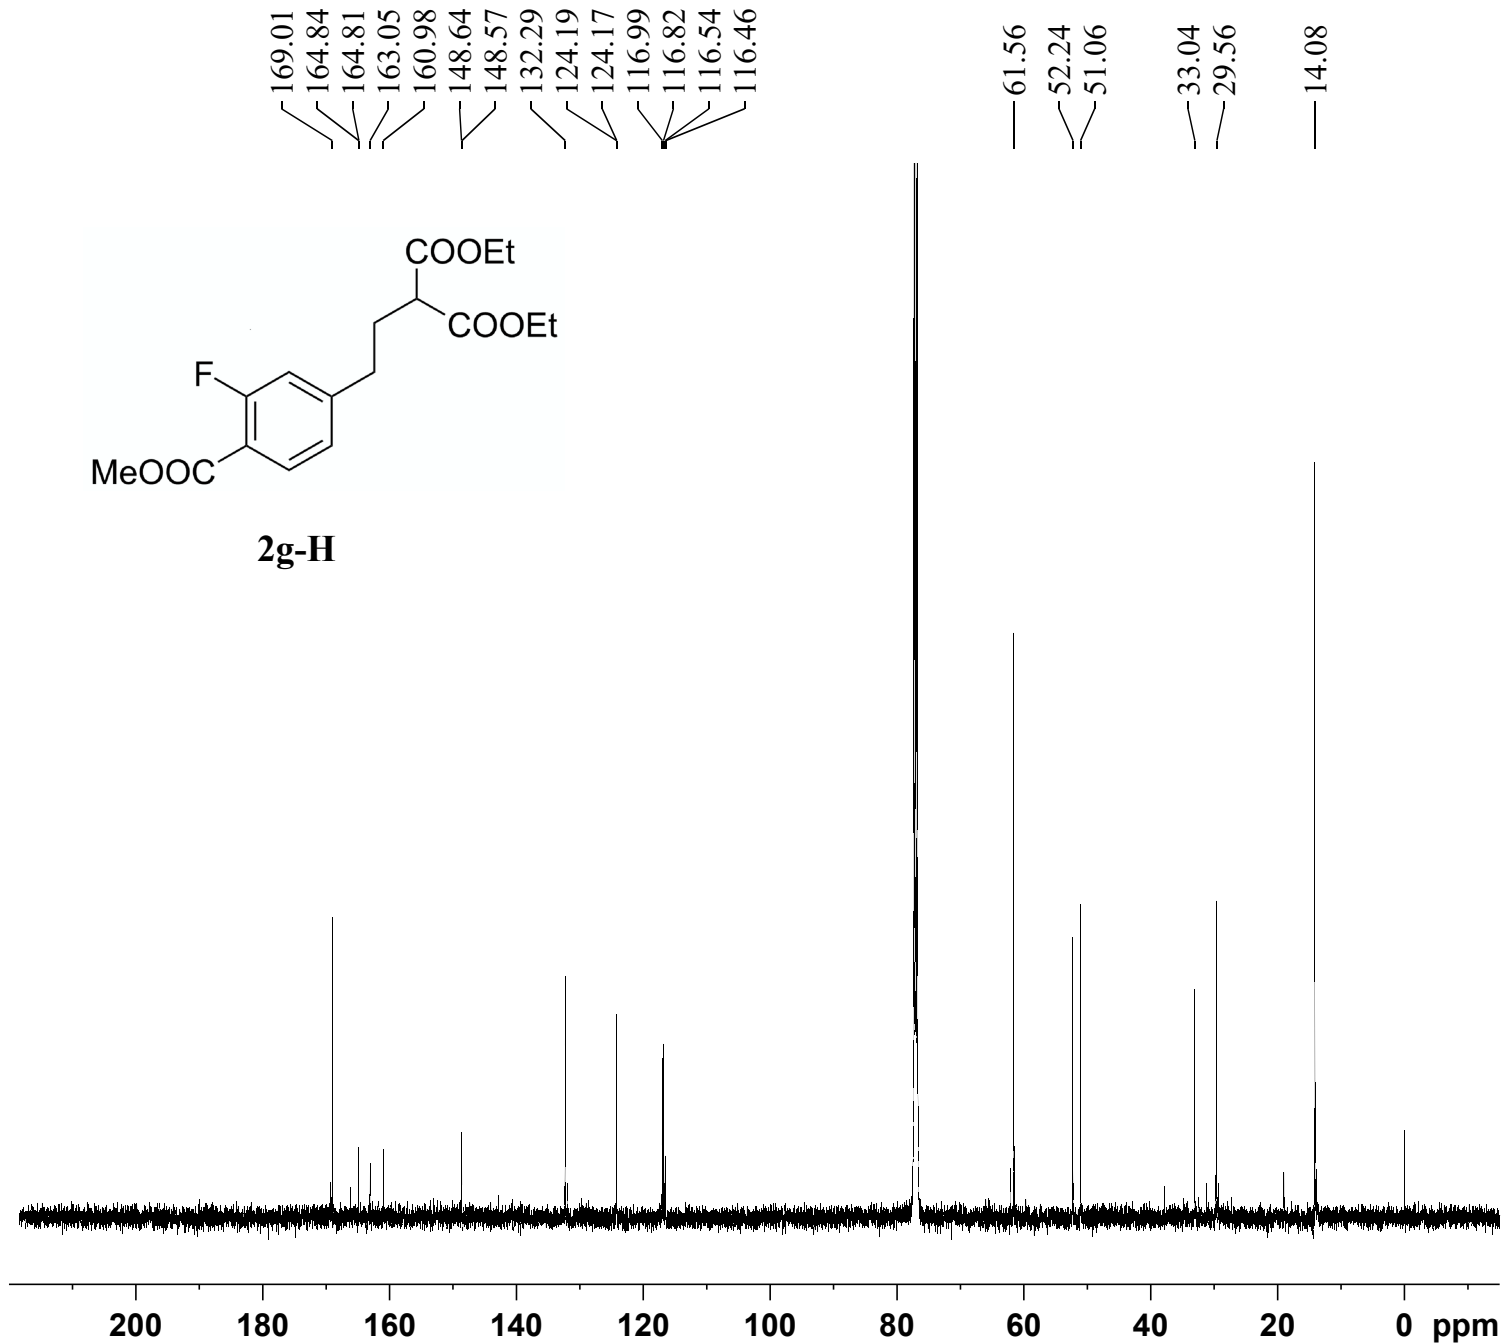

Current Data Parameters  
 NAME 500M-2022  
 EXPNO 4  
 PROCNO 1

F2 - Acquisition Parameters  
 Date\_ 20220216  
 Time 23.32  
 INSTRUM spect  
 PROBHD 5 mm CPPBBO BB  
 PULPROG zgpg30  
 TD 65536  
 SOLVENT CDCl3  
 NS 1024  
 DS 4  
 SWH 29761.904 Hz  
 FIDRES 0.454131 Hz  
 AQ 1.1010048 sec  
 RG 192.89  
 DW 16.800 usec  
 DE 18.00 usec  
 TE 298.2 K  
 D1 2.00000000 sec  
 D11 0.03000000 sec  
 TD0 1

==== CHANNEL f1 =====  
 SFO1 125.7703637 MHz  
 NUC1 13C  
 P1 10.50 usec  
 PLW1 57.00000000 W

==== CHANNEL f2 =====  
 SFO2 500.1320005 MHz  
 NUC2 1H  
 CPDPRG[2] waltz16  
 PCPD2 80.00 usec  
 PLW2 20.00000000 W  
 PLW12 0.39550999 W  
 PLW13 0.25312999 W

F2 - Processing parameters  
 SI 32768  
 SF 125.7577891 MHz  
 WDW EM  
 SSB 0  
 LB 1.00 Hz  
 GB 0  
 PC 1.40



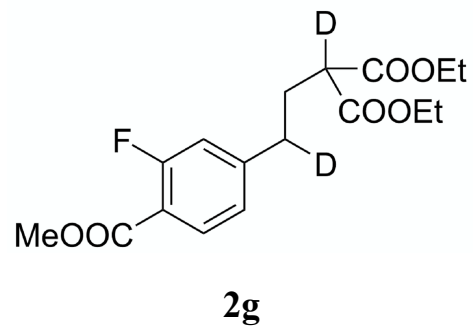

— -109.60

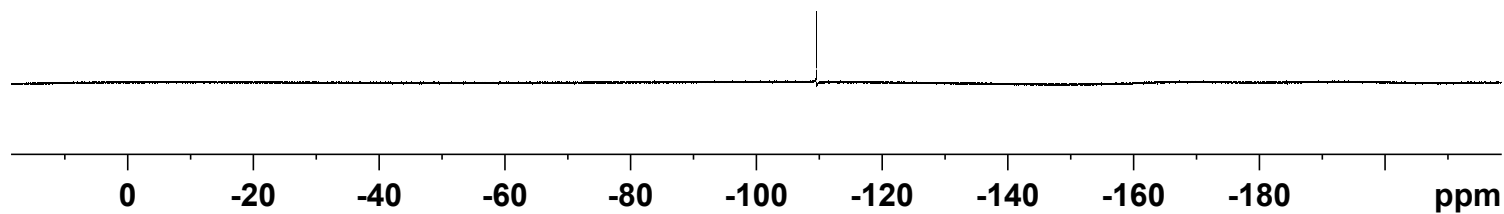

Current Data Parameters  
 NAME 400M-2023-F  
 EXPNO 3  
 PROCNO 1

F2 - Acquisition Parameters  
 Date\_ 20230506  
 Time 18.54  
 INSTRUM spect  
 PROBHD 5 mm PABBO BB/  
 PULPROG zgfhigqn.2  
 TD 131072  
 SOLVENT CDC13  
 NS 16  
 DS 4  
 SWH 89285.711 Hz  
 FIDRES 0.681196 Hz  
 AQ 0.7340032 sec  
 RG 206.33  
 DW 5.600 usec  
 DE 6.50 usec  
 TE 298.0 K  
 D1 1.00000000 sec  
 D11 0.03000000 sec  
 TD0 1

==== CHANNEL f1 =====  
 SFO1 376.5642094 MHz  
 NUC1 19F  
 P1 14.50 usec  
 PLW1 17.98900032 W

==== CHANNEL f2 =====  
 SFO2 400.2416010 MHz  
 NUC2 1H  
 CPDPRG[2] waltz16  
 PCPD2 90.00 usec  
 PLW2 12.00000000 W  
 PLW12 0.30294999 W  
 PLW13 0.24539000 W

F2 - Processing parameters  
 SI 65536  
 SF 376.6018696 MHz  
 WDW EM  
 SSB 0  
 LB 0.30 Hz  
 GB 0  
 PC 1.00

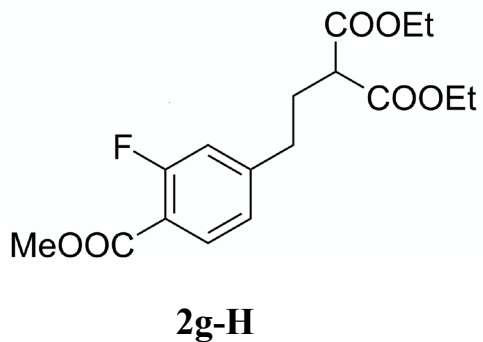

— -109.60

Current Data Parameters  
 NAME 400M-2023-F  
 EXPNO 2  
 PROCNO 1

F2 - Acquisition Parameters  
 Date\_ 20230506  
 Time 18.51  
 INSTRUM spect  
 PROBHD 5 mm PABBO BB/  
 PULPROG zgfhigqn.2  
 TD 131072  
 SOLVENT CDC13  
 NS 16  
 DS 4  
 SWH 89285.711 Hz  
 FIDRES 0.681196 Hz  
 AQ 0.7340032 sec  
 RG 206.33  
 DW 5.600 usec  
 DE 6.50 usec  
 TE 298.0 K  
 D1 1.00000000 sec  
 D11 0.03000000 sec  
 TD0 1

==== CHANNEL f1 =====  
 SFO1 376.5642094 MHz  
 NUC1 19F  
 P1 14.50 usec  
 PLW1 17.98900032 W

==== CHANNEL f2 =====  
 SFO2 400.2416010 MHz  
 NUC2 1H  
 CPDPRG[2] waltz16  
 PCPD2 90.00 usec  
 PLW2 12.00000000 W  
 PLW12 0.30294999 W  
 PLW13 0.24539000 W

F2 - Processing parameters  
 SI 65536  
 SF 376.6018696 MHz  
 WDW EM  
 SSB 0  
 LB 0.30 Hz  
 GB 0  
 PC 1.00

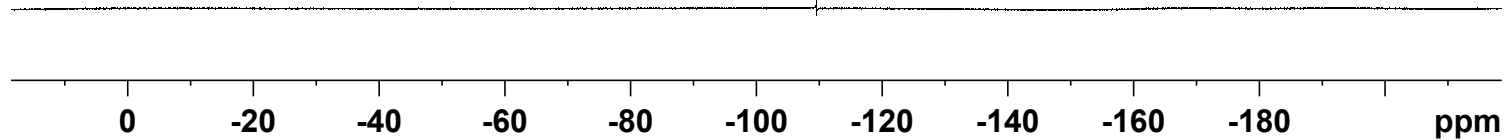

8.959  
8.943  
8.151  
8.136  
8.134  
8.095  
8.081  
7.623  
7.612  
7.610  
7.596  
7.593  
7.580  
7.566  
7.365  
7.350  
4.254  
4.247  
4.242  
4.233  
4.228  
4.218  
4.214  
4.204  
4.200  
4.192  
3.986  
3.461  
3.446  
3.432  
3.186  
3.168  
3.152  
3.136  
2.351  
2.336  
2.321  
1.295  
1.281  
1.267

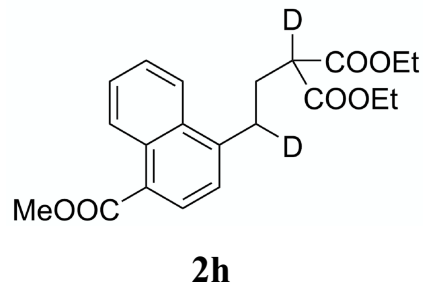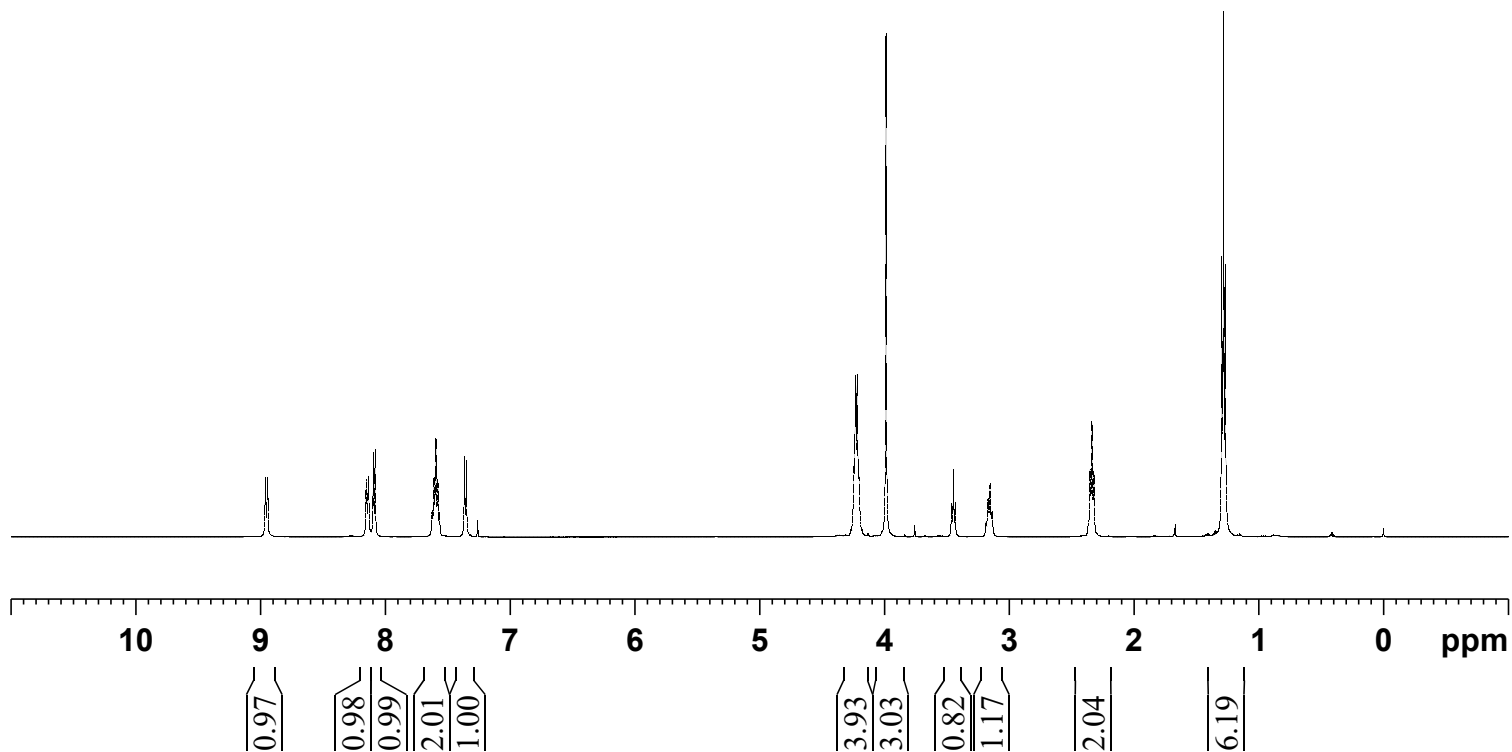

Current Data Parameters  
NAME 500M-2022  
EXPNO 31  
PROCNO 1

F2 - Acquisition Parameters  
Date\_ 20220304  
Time 2.40  
INSTRUM spect  
PROBHD 5 mm CPPBBO BB  
PULPROG zg30  
TD 65536  
SOLVENT CDCl3  
NS 16  
DS 2  
SWH 10000.000 Hz  
FIDRES 0.152588 Hz  
AQ 3.2767999 sec  
RG 31.72  
DW 50.000 usec  
DE 6.50 usec  
TE 298.2 K  
D1 1.00000000 sec  
D11 0 sec  
TD0 1

==== CHANNEL f1 =====  
SFO1 500.1330885 MHz  
NUC1 1H  
P1 11.25 usec  
PLW1 20.00000000 W

==== CHANNEL f2 =====  
SFO2 500.1330885 MHz  
NUC2 off  
CPDPRG[2]  
PCPD2 0 usec  
PLW2 0 W  
PLW12 0 W  
PLW13 0 W

F2 - Processing parameters  
SI 65536  
SF 500.1300121 MHz  
WDW EM  
SSB 0  
LB 0.30 Hz  
GB 0  
PC 1.00

8.955  
8.939  
8.153  
8.137  
8.097  
8.082  
7.627  
7.613  
7.600  
7.597  
7.582  
7.369  
7.354  
4.255  
4.248  
4.244  
4.234  
4.230  
4.220  
4.216  
4.206  
4.202  
4.194  
3.991  
3.460  
3.445  
3.431  
3.189  
3.174  
3.157  
2.367  
2.351  
2.335  
2.320  
1.298  
1.284  
1.269

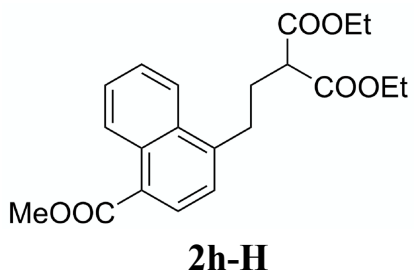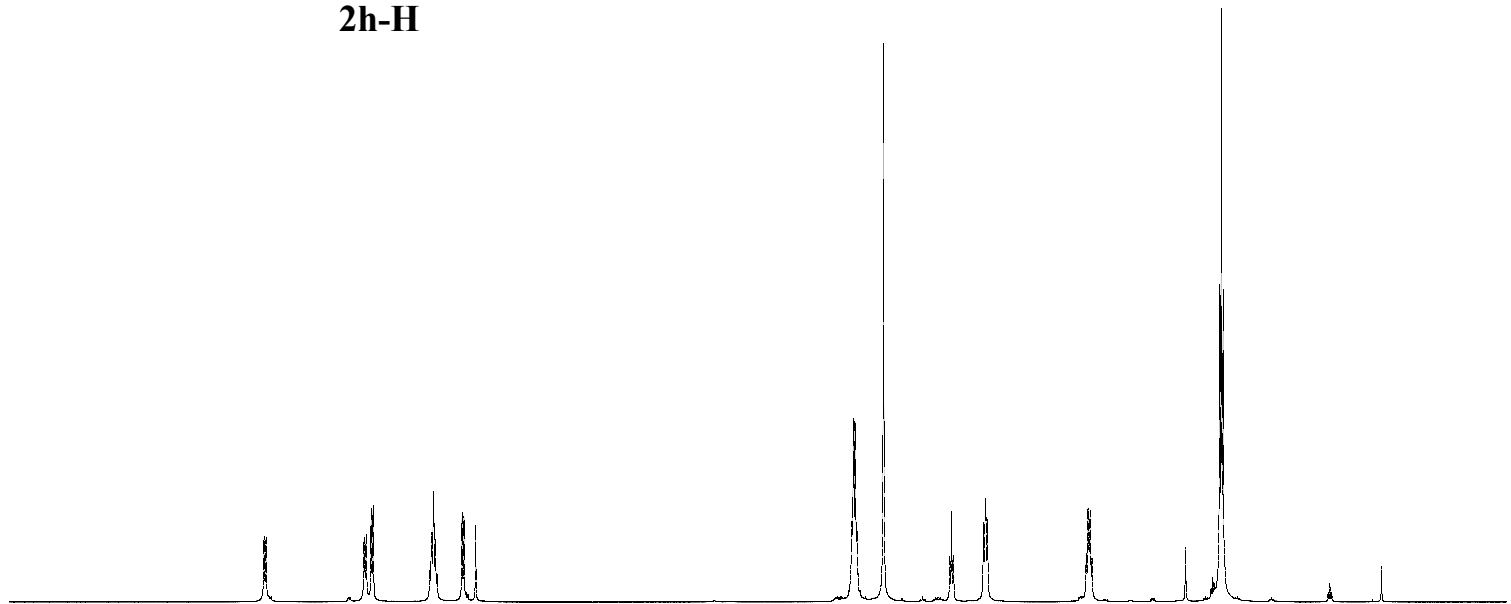

0.99  
2.00  
2.09  
1.08  
3.99  
3.22  
0.97  
2.00  
2.00  
6.67

Current Data Parameters  
NAME 500M-2022  
EXPNO 28  
PROCNO 1

F2 - Acquisition Parameters  
Date\_ 20220304  
Time 2.09  
INSTRUM spect  
PROBHD 5 mm CPPBBO BB  
PULPROG zg30  
TD 65536  
SOLVENT CDCl3  
NS 16  
DS 2  
SWH 10000.000 Hz  
FIDRES 0.152588 Hz  
AQ 3.2767999 sec  
RG 55.37  
DW 50.000 usec  
DE 6.50 usec  
TE 298.2 K  
D1 1.00000000 sec  
D11 0 sec  
TD0 1

==== CHANNEL f1 =====  
SFO1 500.1330885 MHz  
NUC1 1H  
P1 11.25 usec  
PLW1 20.00000000 W

==== CHANNEL f2 =====  
SFO2 500.1330885 MHz  
NUC2 off  
CPDPRG[2]  
PCPD2 0 usec  
PLW2 0 W  
PLW12 0 W  
PLW13 0 W

F2 - Processing parameters  
SI 65536  
SF 500.1300124 MHz  
WDW EM  
SSB 0  
LB 0.30 Hz  
GB 0  
PC 1.00

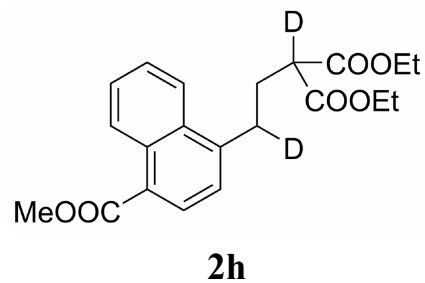

169.20  
168.05  
142.70  
132.07  
131.75  
129.86  
127.37  
126.54  
126.38  
126.12  
125.23  
124.08

61.54  
52.12  
51.62  
31.22  
31.04  
30.89  
30.73  
29.55  
29.48  
29.39  
14.11

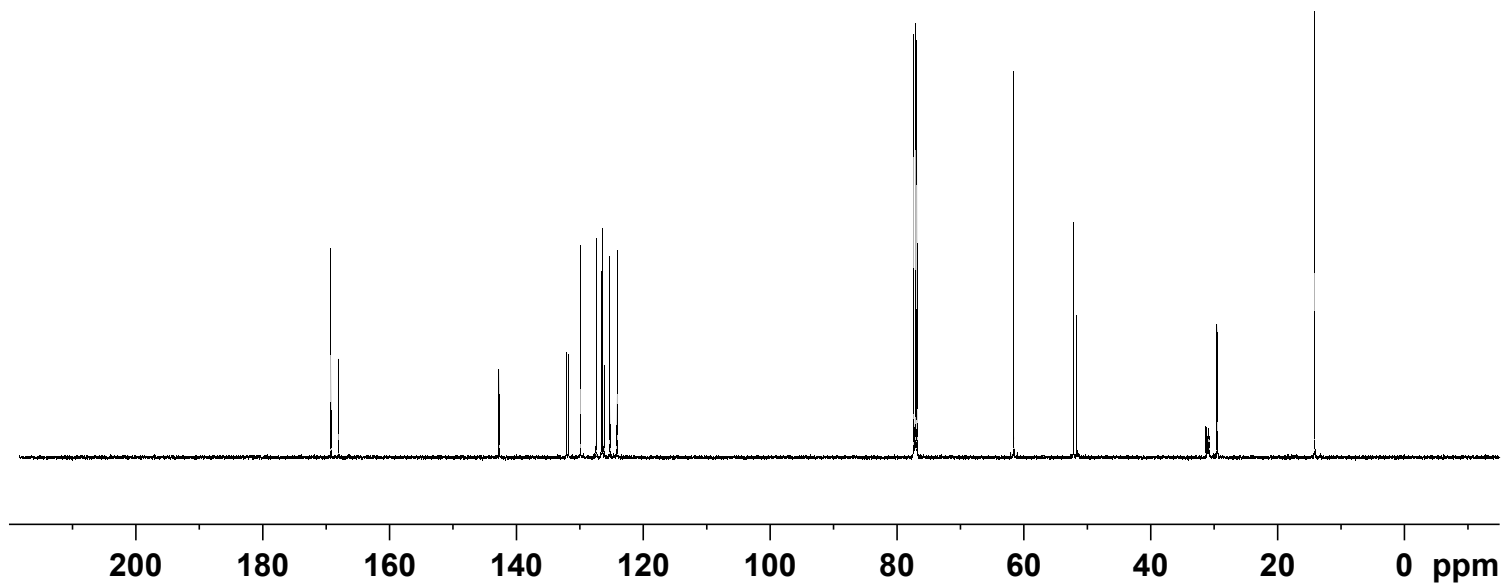

Current Data Parameters  
NAME 500M-2022  
EXPNO 32  
PROCNO 1

F2 - Acquisition Parameters  
Date\_ 20220304  
Time 2.46  
INSTRUM spect  
PROBHD 5 mm CPPBBO BB  
PULPROG zgpg30  
TD 65536  
SOLVENT CDCl3  
NS 100  
DS 4  
SWH 29761.904 Hz  
FIDRES 0.454131 Hz  
AQ 1.1010048 sec  
RG 192.89  
DW 16.800 usec  
DE 18.00 usec  
TE 298.2 K  
D1 2.00000000 sec  
D11 0.03000000 sec  
TD0 1

==== CHANNEL f1 =====  
SFO1 125.7703637 MHz  
NUC1 13C  
P1 10.50 usec  
PLW1 57.00000000 W

==== CHANNEL f2 =====  
SFO2 500.1320005 MHz  
NUC2 1H  
CPDPRG[2] waltz16  
PCPD2 80.00 usec  
PLW2 20.00000000 W  
PLW12 0.39550999 W  
PLW13 0.25312999 W

F2 - Processing parameters  
SI 32768  
SF 125.7577885 MHz  
WDW EM  
SSB 0  
LB 1.00 Hz  
GB 0  
PC 1.40

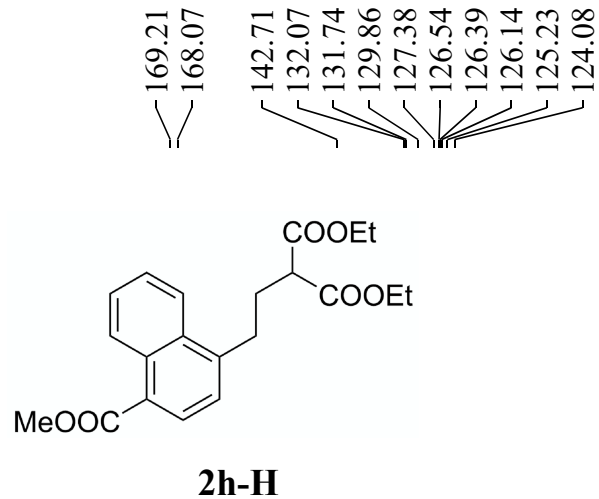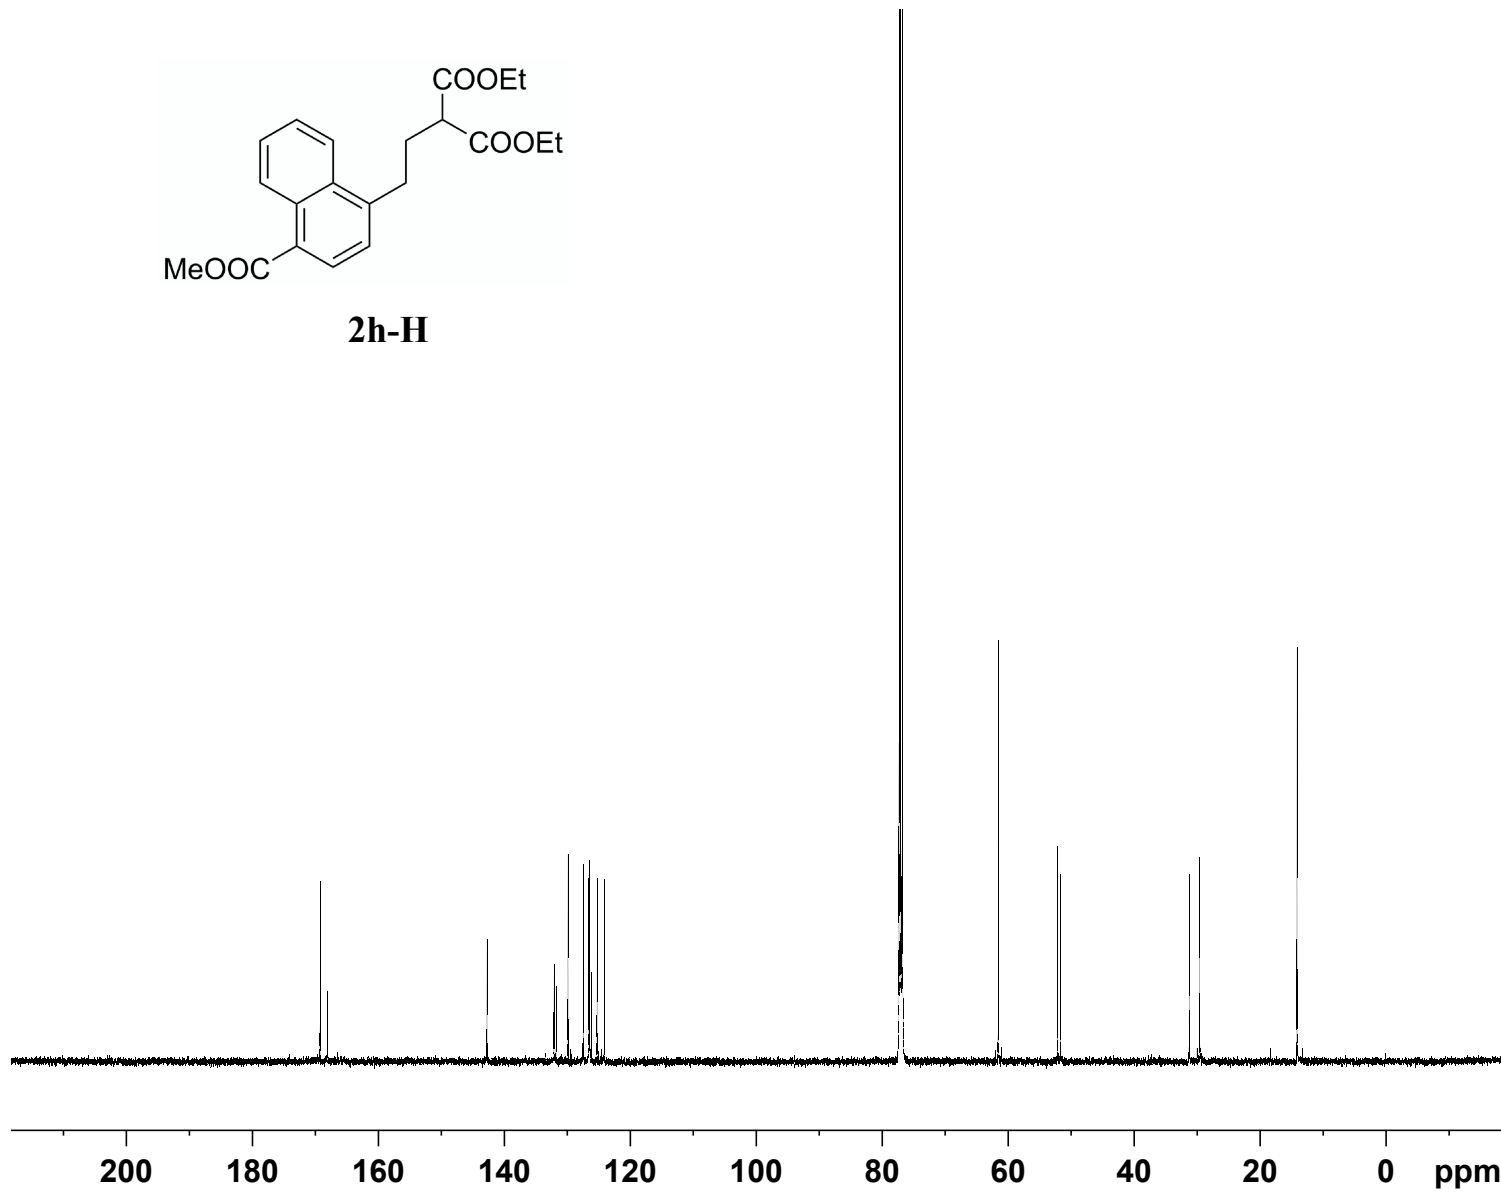

Current Data Parameters  
 NAME 500M-2022  
 EXPNO 30  
 PROCNO 1

F2 - Acquisition Parameters  
 Date\_ 20220304  
 Time 2.36  
 INSTRUM spect  
 PROBHD 5 mm CPPBBO BB  
 PULPROG zgpg30  
 TD 65536  
 SOLVENT CDC13  
 NS 400  
 DS 4  
 SWH 29761.904 Hz  
 FIDRES 0.454131 Hz  
 AQ 1.1010048 sec  
 RG 192.89  
 DW 16.800 usec  
 DE 18.00 usec  
 TE 298.2 K  
 D1 2.00000000 sec  
 D11 0.03000000 sec  
 TD0 1

==== CHANNEL f1 =====  
 SFO1 125.7703637 MHz  
 NUC1 13C  
 P1 10.50 usec  
 PLW1 57.00000000 W

==== CHANNEL f2 =====  
 SFO2 500.1320005 MHz  
 NUC2 1H  
 CPDPRG[2] waltz16  
 PCPD2 80.00 usec  
 PLW2 20.00000000 W  
 PLW12 0.39550999 W  
 PLW13 0.25312999 W

F2 - Processing parameters  
 SI 32768  
 SF 125.7577885 MHz  
 WDW EM  
 SSB 0  
 LB 1.00 Hz  
 GB 0  
 PC 1.40

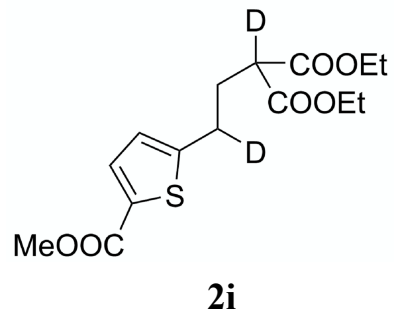

Chemical shift values (ppm) for the peaks in the spectrum:

- 7.640, 7.633
- 6.826, 6.819
- 4.233, 4.230, 4.219, 4.216, 4.205, 4.202, 4.191, 4.188
- 3.862, 3.391, 3.376, 3.361
- 2.922, 2.906, 2.890, 2.874, 2.287, 2.272, 2.257, 1.291, 1.277, 1.263

Current Data Parameters

|        |           |
|--------|-----------|
| NAME   | 500M-2022 |
| EXPNO  | 41        |
| PROCNO | 1         |

F2 - Acquisition Parameters

|         |                |
|---------|----------------|
| Date_   | 20220315       |
| Time    | 6.20           |
| INSTRUM | spect          |
| PROBHD  | 5 mm CPPBBO BB |
| PULPROG | zg30           |
| TD      | 65536          |
| SOLVENT | CDCl3          |
| NS      | 16             |
| DS      | 2              |
| SWH     | 10000.000 Hz   |
| FIDRES  | 0.152588 Hz    |
| AQ      | 3.2767999 sec  |
| RG      | 31.72          |
| DW      | 50.000 usec    |
| DE      | 6.50 usec      |
| TE      | 298.2 K        |
| D1      | 1.00000000 sec |
| D11     | 0 sec          |
| TD0     | 1              |

==== CHANNEL f1 =====

|      |                 |
|------|-----------------|
| SFO1 | 500.1330885 MHz |
| NUC1 | 1H              |
| P1   | 11.25 usec      |
| PLW1 | 20.00000000 W   |

==== CHANNEL f2 =====

|           |                 |
|-----------|-----------------|
| SFO2      | 500.1330885 MHz |
| NUC2      | off             |
| CPDPRG[2] |                 |
| PCPD2     | 0 usec          |
| PLW2      | 0 W             |
| PLW12     | 0 W             |
| PLW13     | 0 W             |

F2 - Processing parameters

|     |                 |
|-----|-----------------|
| SI  | 65536           |
| SF  | 500.1300078 MHz |
| WDW | EM              |
| SSB | 0               |
| LB  | 0.30 Hz         |
| GB  | 0               |
| PC  | 1.00            |

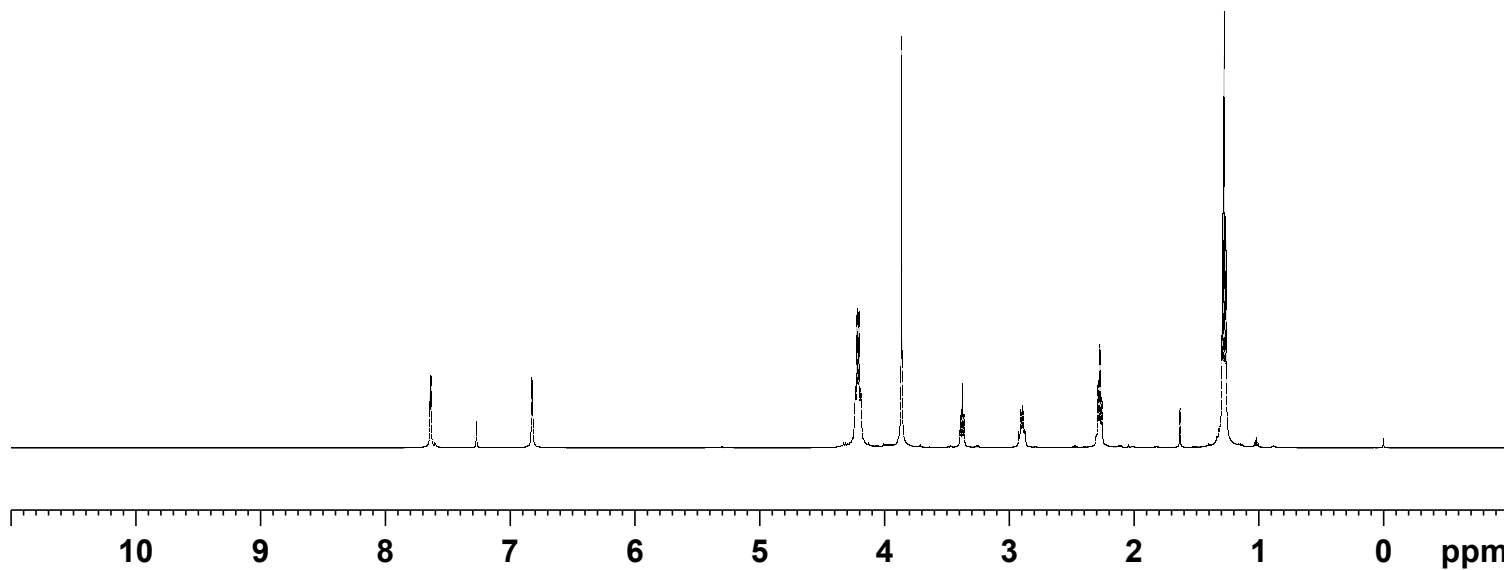

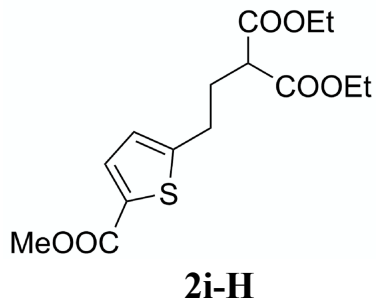

7.640  
 7.633  
 6.827  
 6.820  
 4.230  
 4.219  
 4.217  
 4.205  
 4.203  
 4.192  
 4.189  
 3.862  
 3.393  
 3.378  
 3.363  
 2.923  
 2.908  
 2.892  
 2.302  
 2.287  
 2.272  
 2.257  
 1.291  
 1.277  
 1.263

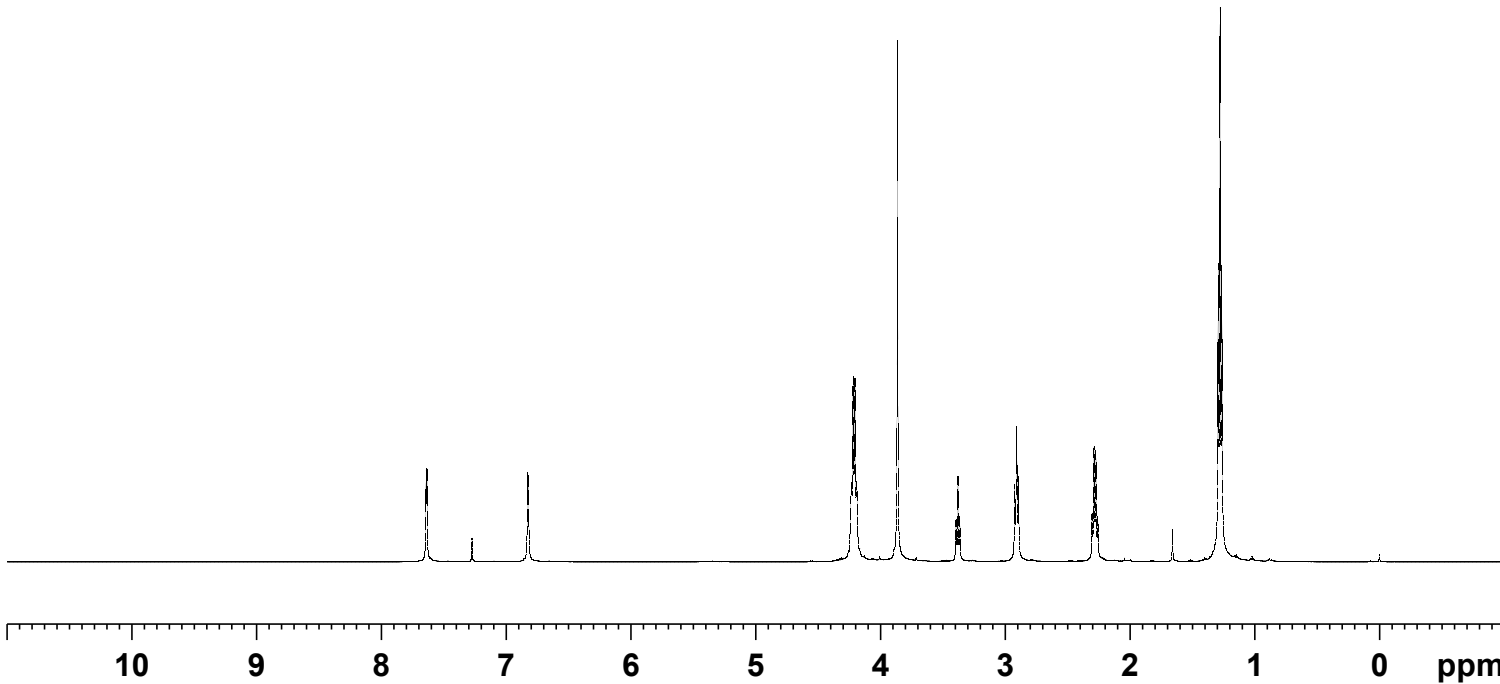

1.00  
 1.02  
 4.36  
 3.18  
 1.00  
 2.03  
 2.07  
 7.01

Current Data Parameters  
 NAME 500M-2022  
 EXPNO 38  
 PROCNO 1  
  
 F2 - Acquisition Parameters  
 Date\_ 20220315  
 Time 5.54  
 INSTRUM spect  
 PROBHD 5 mm CPPBBO BB  
 PULPROG zg30  
 TD 65536  
 SOLVENT CDCl3  
 NS 16  
 DS 2  
 SWH 10000.000 Hz  
 FIDRES 0.152588 Hz  
 AQ 3.2767999 sec  
 RG 31.72  
 DW 50.000 usec  
 DE 6.50 usec  
 TE 298.2 K  
 D1 1.00000000 sec  
 D11 0 sec  
 TD0 1  
  
 ===== CHANNEL f1 =====  
 SFO1 500.1330885 MHz  
 NUC1 1H  
 P1 11.25 usec  
 PLW1 20.00000000 W  
  
 ===== CHANNEL f2 =====  
 SFO2 500.1330885 MHz  
 NUC2 off  
 CPDPRG[2]  
 PCPD2 0 usec  
 PLW2 0 W  
 PLW12 0 W  
 PLW13 0 W  
  
 F2 - Processing parameters  
 SI 65536  
 SF 500.1300060 MHz  
 WDW EM  
 SSB 0  
 LB 0.30 Hz  
 GB 0  
 PC 1.00



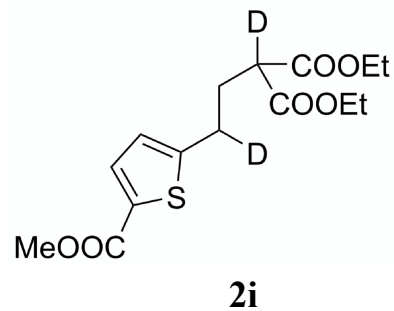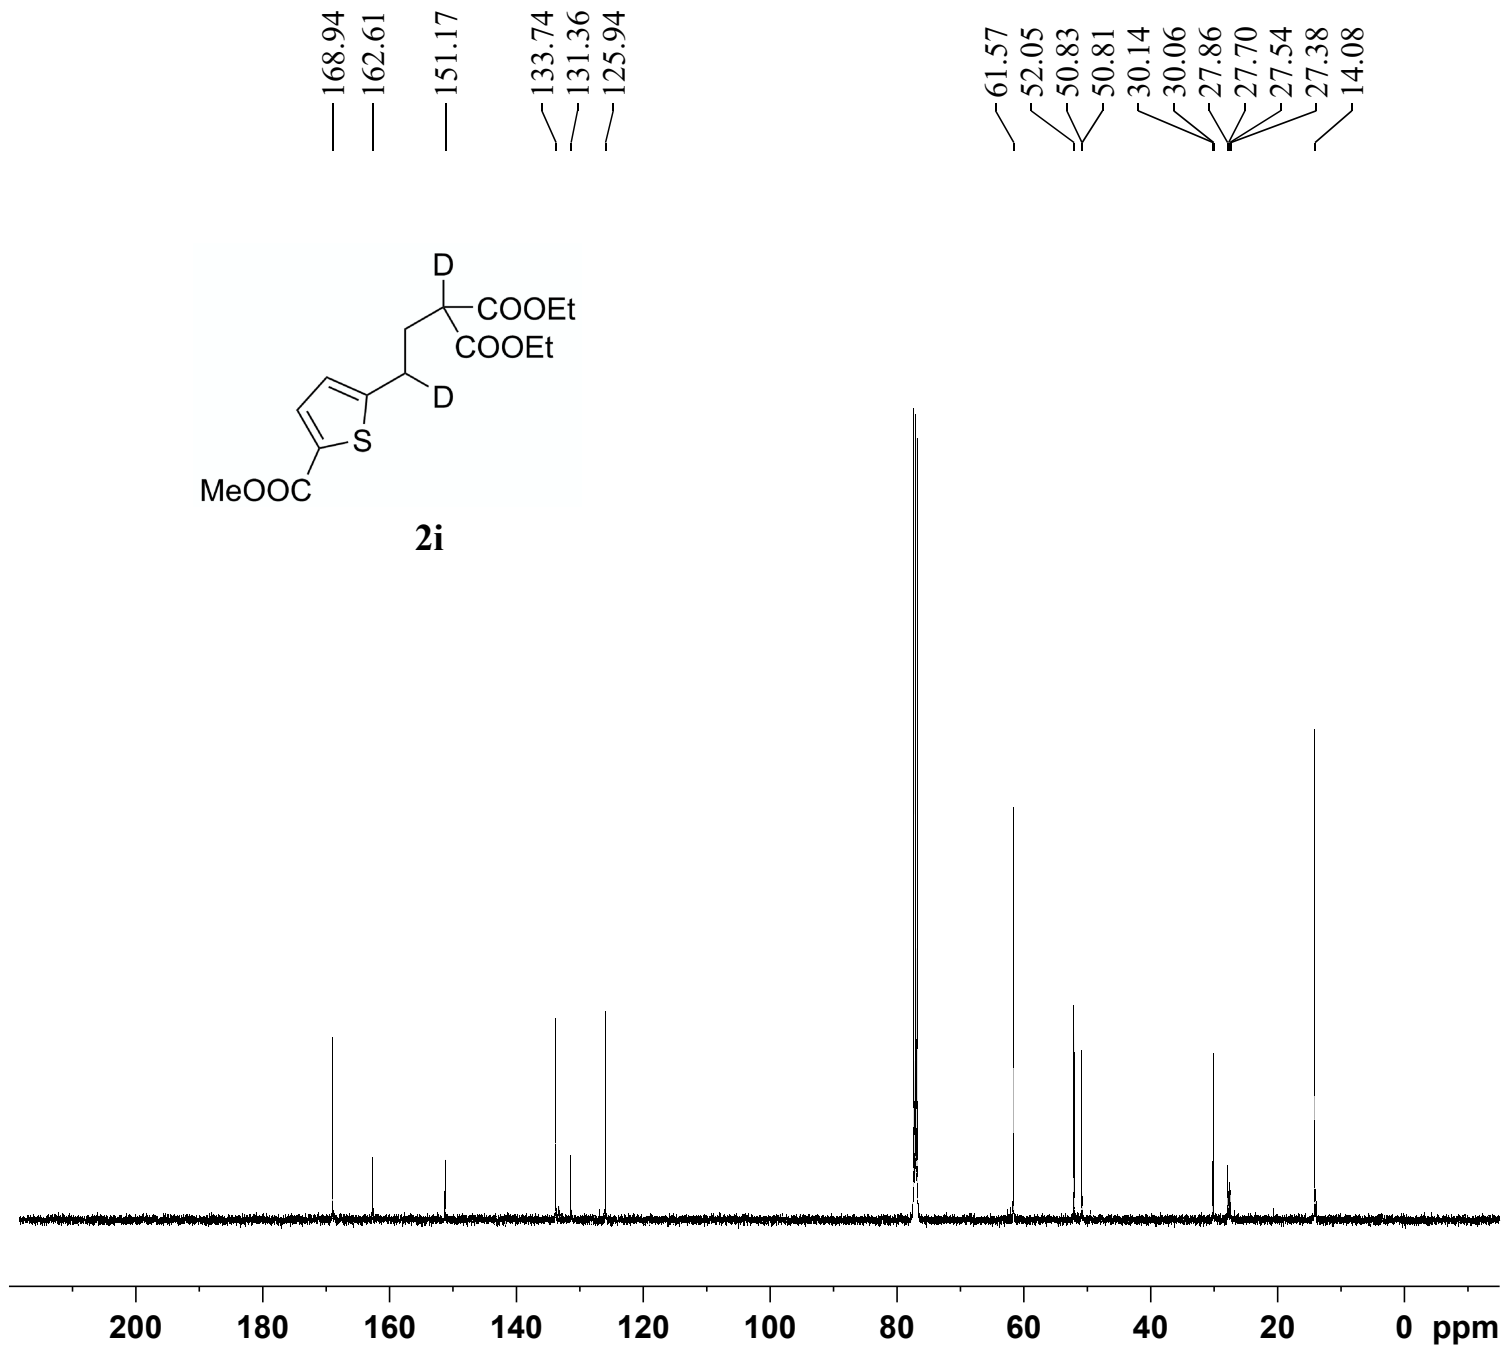

S105

Current Data Parameters  
 NAME 500M-2022  
 EXPNO 42  
 PROCNO 1

F2 - Acquisition Parameters  
 Date\_ 20220315  
 Time 6.24  
 INSTRUM spect  
 PROBHD 5 mm CPPBBO BB  
 PULPROG zgpg30  
 TD 65536  
 SOLVENT CDCl3  
 NS 80  
 DS 4  
 SWH 29761.904 Hz  
 FIDRES 0.454131 Hz  
 AQ 1.1010048 sec  
 RG 192.89  
 DW 16.800 usec  
 DE 18.00 usec  
 TE 298.2 K  
 D1 2.00000000 sec  
 D11 0.03000000 sec  
 TD0 1

==== CHANNEL f1 =====  
 SFO1 125.7703637 MHz  
 NUC1 13C  
 P1 10.50 usec  
 PLW1 57.00000000 W

==== CHANNEL f2 =====  
 SFO2 500.1320005 MHz  
 NUC2 1H  
 CPDPRG[2] waltz16  
 PCPD2 80.00 usec  
 PLW2 20.00000000 W  
 PLW12 0.39550999 W  
 PLW13 0.25312999 W

F2 - Processing parameters  
 SI 32768  
 SF 125.7577885 MHz  
 WDW EM  
 SSB 0  
 LB 1.00 Hz  
 GB 0  
 PC 1.40

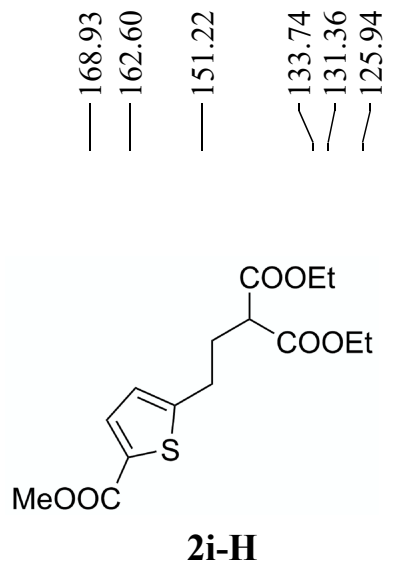

— 168.93  
 — 162.60  
 — 151.22  
 — 133.74  
 — 131.36  
 — 125.94  
  
 — 61.57  
 — 52.04  
 — 50.82  
  
 — 30.14  
 — 27.86  
  
 — 14.08

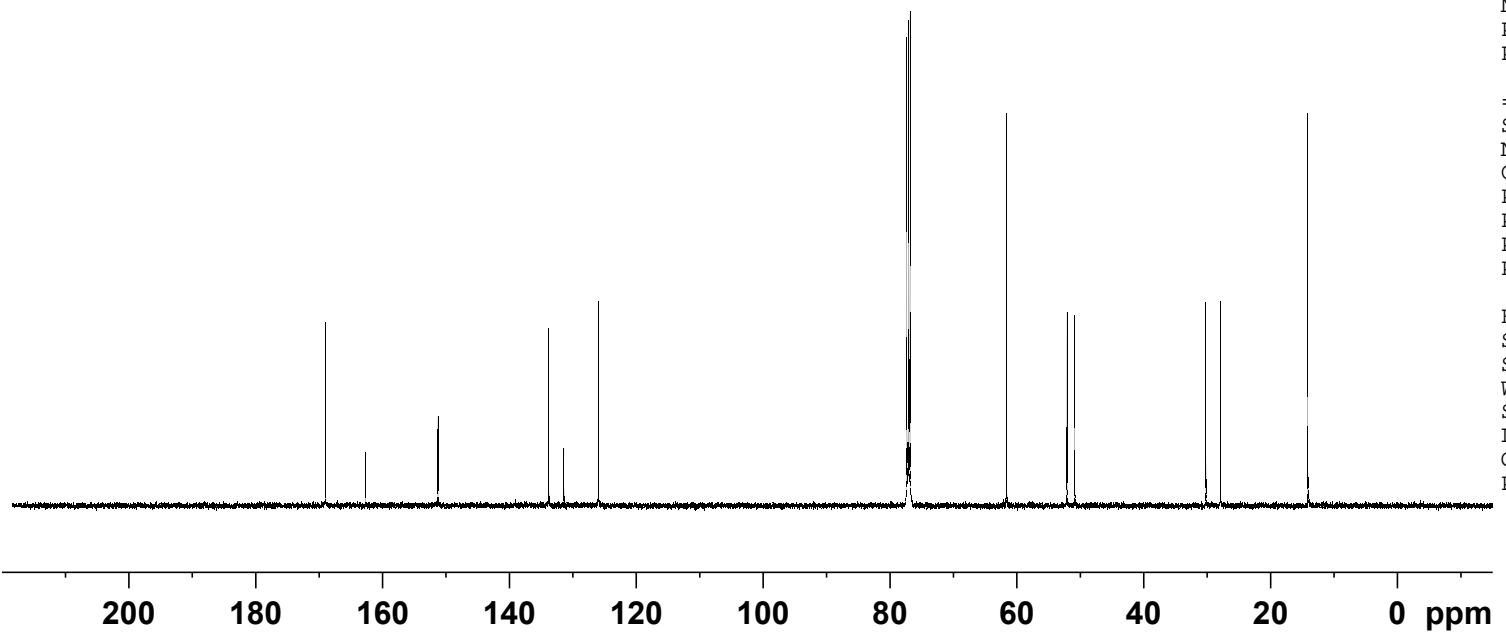

Current Data Parameters  
 NAME 500M-2022  
 EXPNO 39  
 PROCNO 1  
  
 F2 - Acquisition Parameters  
 Date\_ 20220315  
 Time 5.59  
 INSTRUM spect  
 PROBHD 5 mm CPPBBO BB  
 PULPROG zgpg30  
 TD 65536  
 SOLVENT CDCl3  
 NS 80  
 DS 4  
 SWH 29761.904 Hz  
 FIDRES 0.454131 Hz  
 AQ 1.1010048 sec  
 RG 192.89  
 DW 16.800 usec  
 DE 18.00 usec  
 TE 298.2 K  
 D1 2.00000000 sec  
 D11 0.03000000 sec  
 TD0 1

===== CHANNEL f1 =====  
 SFO1 125.7703637 MHz  
 NUC1 13C  
 P1 10.50 usec  
 PLW1 57.00000000 W  
  
 ===== CHANNEL f2 =====  
 SFO2 500.1320005 MHz  
 NUC2 1H  
 CPDPRG[2] waltz16  
 PCPD2 80.00 usec  
 PLW2 20.00000000 W  
 PLW12 0.39550999 W  
 PLW13 0.25312999 W

F2 - Processing parameters  
 SI 32768  
 SF 125.7577885 MHz  
 WDW EM  
 SSB 0  
 LB 1.00 Hz  
 GB 0  
 PC 1.40

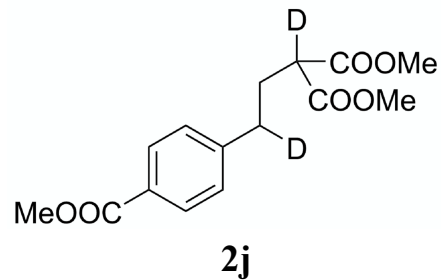

7.974  
7.958  
7.264  
7.248

3.905  
3.743  
3.387  
3.372  
3.357  
2.711  
2.695  
2.680  
2.255  
2.240  
2.225

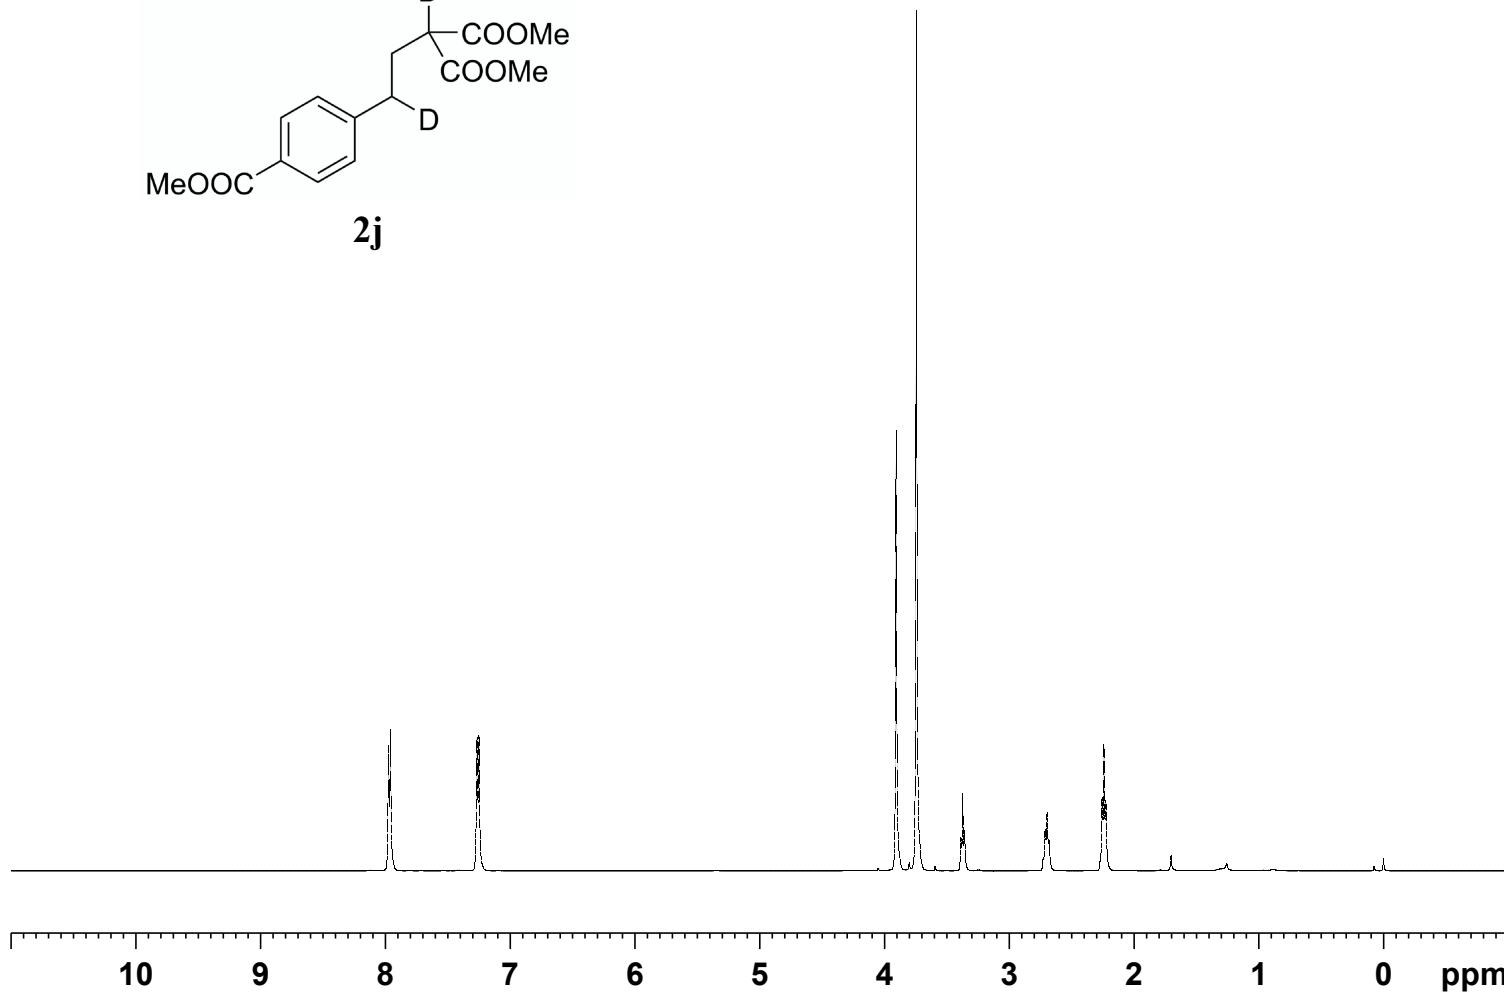

2.00

2.15

3.11

6.04

0.99

1.18

2.05

Current Data Parameters  
NAME 500M-2020xia  
EXPNO 187  
PROCNO 1

F2 - Acquisition Parameters  
Date\_ 20211124  
Time 18.45  
INSTRUM spect  
PROBHD 5 mm CPPBBO BB  
PULPROG zg30  
TD 65536  
SOLVENT CDCl3  
NS 16  
DS 2  
SWH 10000.000 Hz  
FIDRES 0.152588 Hz  
AQ 3.2767999 sec  
RG 31.72  
DW 50.000 usec  
DE 6.50 usec  
TE 0 K  
D1 1.00000000 sec  
D11 0 sec  
TD0 1

==== CHANNEL f1 =====  
SFO1 500.1330885 MHz  
NUC1 1H  
P1 10.59 usec  
PLW1 20.00000000 W

==== CHANNEL f2 =====  
SFO2 500.1330885 MHz  
NUC2 off  
CPDPRG[2]  
PCPD2 0 usec  
PLW2 0 W  
PLW12 0 W  
PLW13 0 W

F2 - Processing parameters  
SI 65536  
SF 500.1300028 MHz  
WDW EM  
SSB 0  
LB 0.30 Hz  
GB 0  
PC 1.00

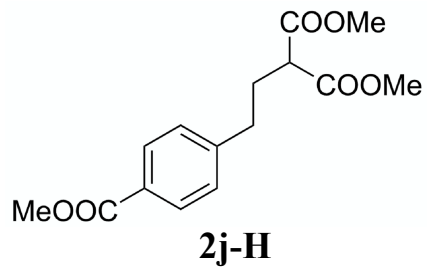

7.974  
 7.958  
 7.264  
 7.249

3.905  
 3.743  
 3.388  
 3.373  
 3.359  
 2.727  
 2.712  
 2.697  
 2.270  
 2.255  
 2.240  
 2.225

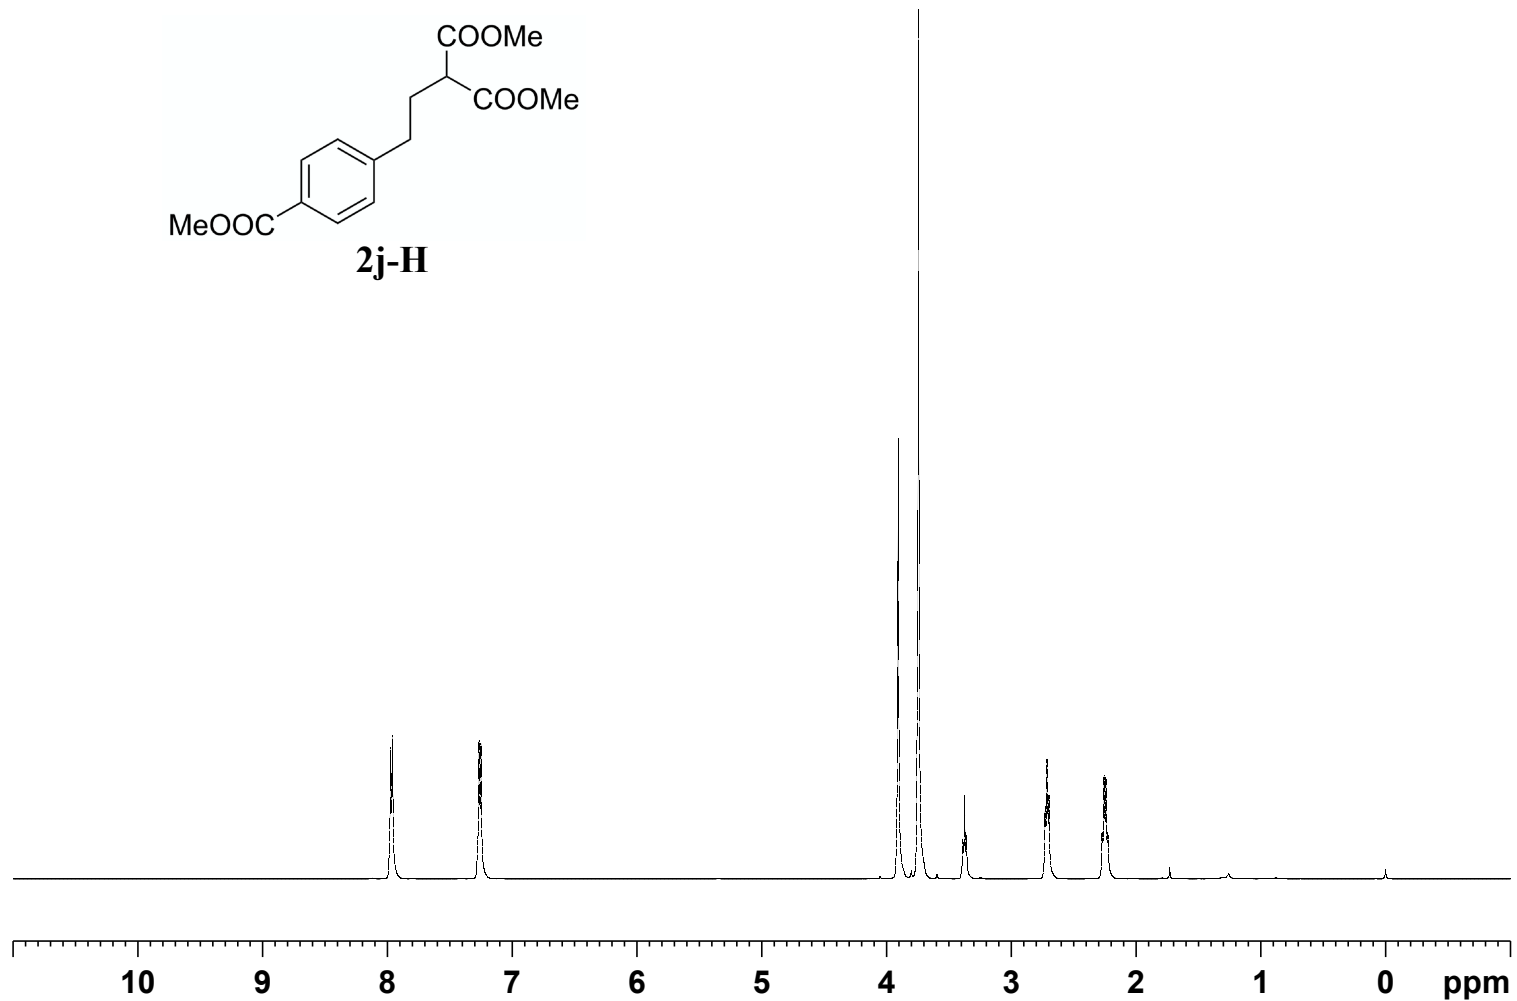

2.00

2.14

3.15

5.99

1.04

2.02

2.05

Current Data Parameters  
 NAME 500M-2020xia  
 EXPNO 185  
 PROCNO 1

F2 - Acquisition Parameters  
 Date\_ 20211124  
 Time 18.26  
 INSTRUM spect  
 PROBHD 5 mm CPPBBO BB  
 PULPROG zg30  
 TD 65536  
 SOLVENT CDCl3  
 NS 16  
 DS 2  
 SWH 10000.000 Hz  
 FIDRES 0.152588 Hz  
 AQ 3.2767999 sec  
 RG 31.72  
 DW 50.000 usec  
 DE 6.50 usec  
 TE 0 K  
 D1 1.00000000 sec  
 D11 0 sec  
 TD0 1

===== CHANNEL f1 =====  
 SFO1 500.1330885 MHz  
 NUC1 1H  
 P1 10.59 usec  
 PLW1 20.00000000 W

===== CHANNEL f2 =====  
 SFO2 500.1330885 MHz  
 NUC2 off  
 CPDPRG[2]  
 PCPD2 0 usec  
 PLW2 0 W  
 PLW12 0 W  
 PLW13 0 W

F2 - Processing parameters  
 SI 65536  
 SF 500.1300013 MHz  
 WDW EM  
 SSB 0  
 LB 0.30 Hz  
 GB 0  
 PC 1.00

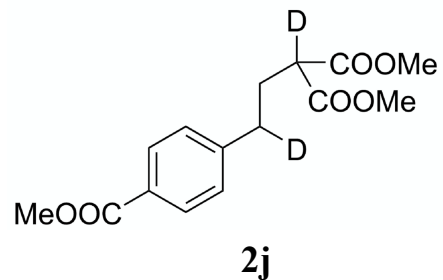

169.55  
167.01

145.92

129.85  
128.56  
128.27

52.63  
52.05  
50.78  
33.31  
33.11  
32.96  
32.80  
29.97  
29.90

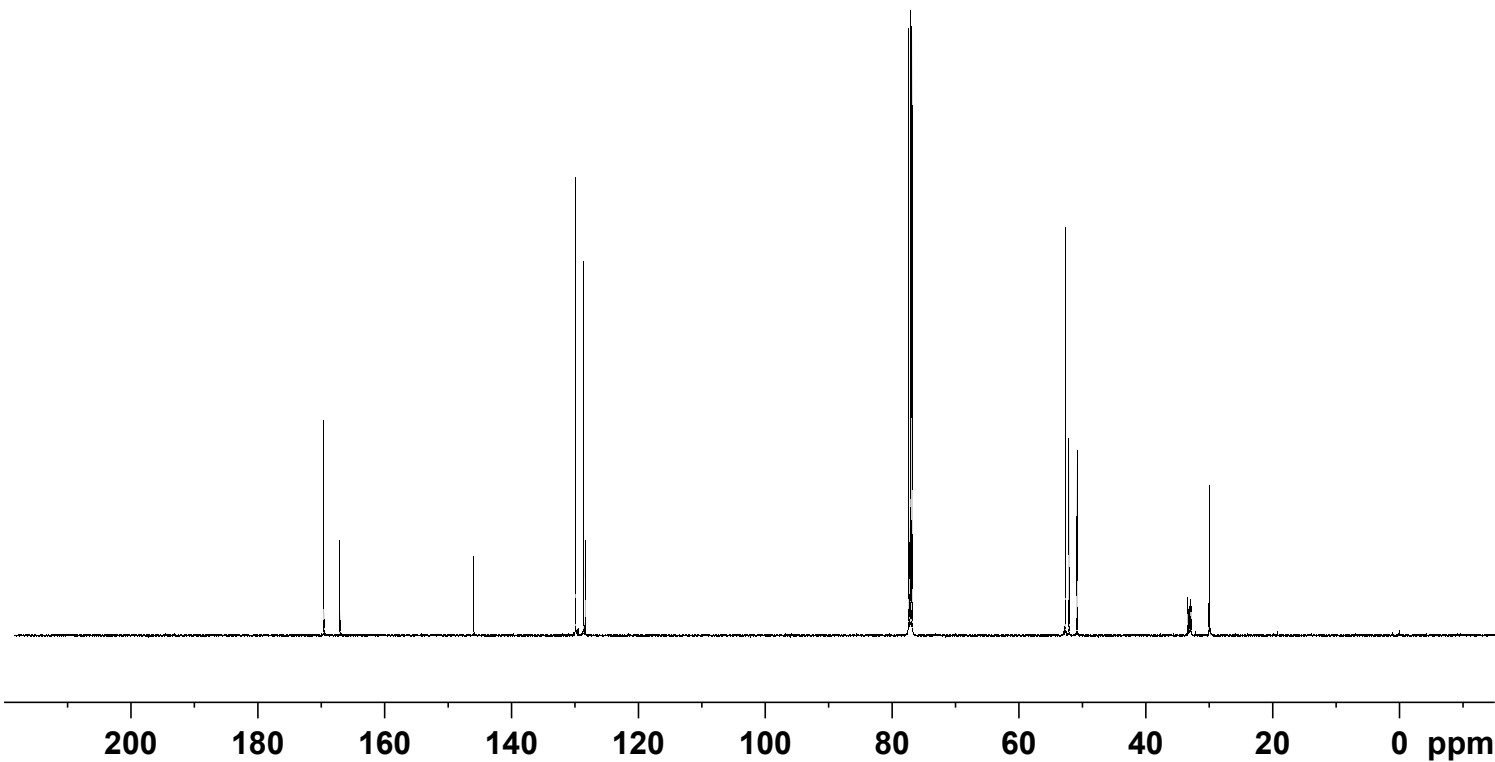

Current Data Parameters  
NAME 500M-2020xia  
EXPNO 188  
PROCNO 1

F2 - Acquisition Parameters  
Date\_ 20211124  
Time 19.13  
INSTRUM spect  
PROBHD 5 mm CPPBBO BB  
PULPROG zgpg30  
TD 65536  
SOLVENT CDCl3  
NS 512  
DS 4  
SWH 29761.904 Hz  
FIDRES 0.454131 Hz  
AQ 1.1010048 sec  
RG 192.89  
DW 16.800 usec  
DE 18.00 usec  
TE 0 K  
D1 2.0000000 sec  
D11 0.0300000 sec  
TD0 1

==== CHANNEL f1 =====  
SFO1 125.7703637 MHz  
NUC1 13C  
P1 9.80 usec  
PLW1 57.0000000 W

==== CHANNEL f2 =====  
SFO2 500.1320005 MHz  
NUC2 1H  
CPDPRG[2] waltz16  
PCPD2 80.00 usec  
PLW2 20.0000000 W  
PLW12 0.35778001 W  
PLW13 0.22898000 W

F2 - Processing parameters  
SI 32768  
SF 125.7577885 MHz  
WDW EM  
SSB 0  
LB 1.00 Hz  
GB 0  
PC 1.40

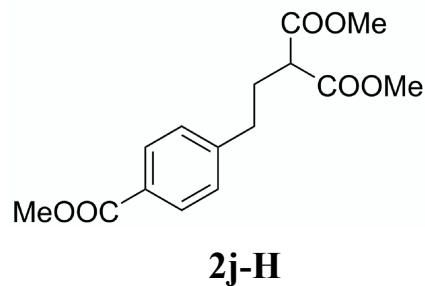

169.54  
 167.00  
 145.95  
 129.84  
 128.56  
 128.27

52.62  
 52.05  
 50.80  
 33.30  
 29.97

Current Data Parameters  
 NAME 500M-2020xia  
 EXPNO 186  
 PROCNO 1

F2 - Acquisition Parameters  
 Date\_ 20211124  
 Time 18.41  
 INSTRUM spect  
 PROBHD 5 mm CPPBBO BB  
 PULPROG zgpg30  
 TD 65536  
 SOLVENT CDC13  
 NS 293  
 DS 4  
 SWH 29761.904 Hz  
 FIDRES 0.454131 Hz  
 AQ 1.1010048 sec  
 RG 192.89  
 DW 16.800 usec  
 DE 18.00 usec  
 TE 0 K  
 D1 2.00000000 sec  
 D11 0.03000000 sec  
 TD0 1

===== CHANNEL f1 =====  
 SFO1 125.7703637 MHz  
 NUC1 13C  
 P1 9.80 usec  
 PLW1 57.00000000 W

===== CHANNEL f2 =====  
 SFO2 500.132005 MHz  
 NUC2 1H  
 CPDPRG[2] waltz16  
 PCPD2 80.00 usec  
 PLW2 20.00000000 W  
 PLW12 0.35778001 W  
 PLW13 0.22898000 W

F2 - Processing parameters  
 SI 32768  
 SF 125.7577885 MHz  
 WDW EM  
 SSB 0  
 LB 1.00 Hz  
 GB 0  
 PC 1.40

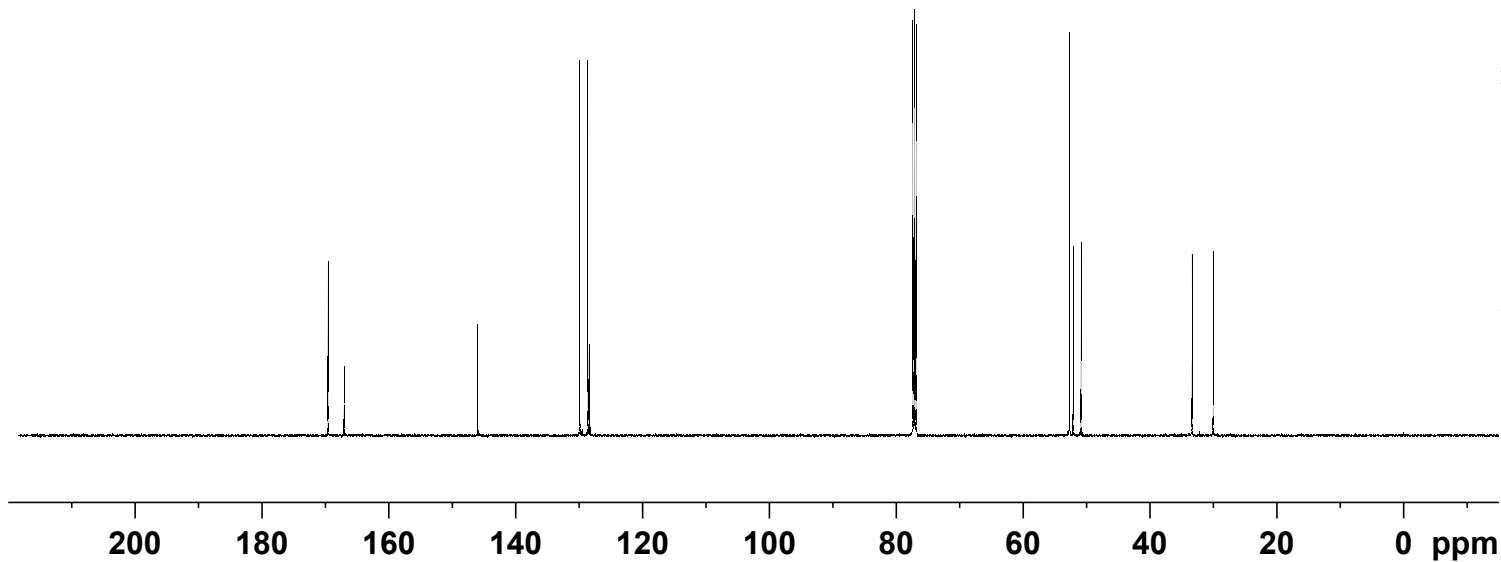

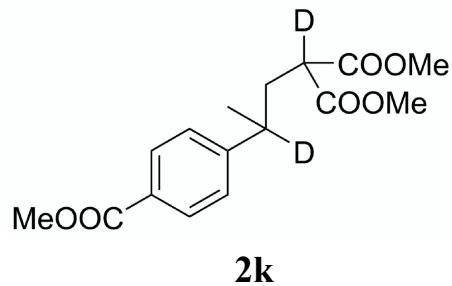

7.987  
7.971  
7.250  
7.234

3.908  
3.741  
3.639  
3.190  
3.177  
3.173  
3.161  
2.792  
2.779  
2.271  
2.253  
2.243  
2.225  
2.190  
2.178  
2.162  
2.150  
1.303  
1.289

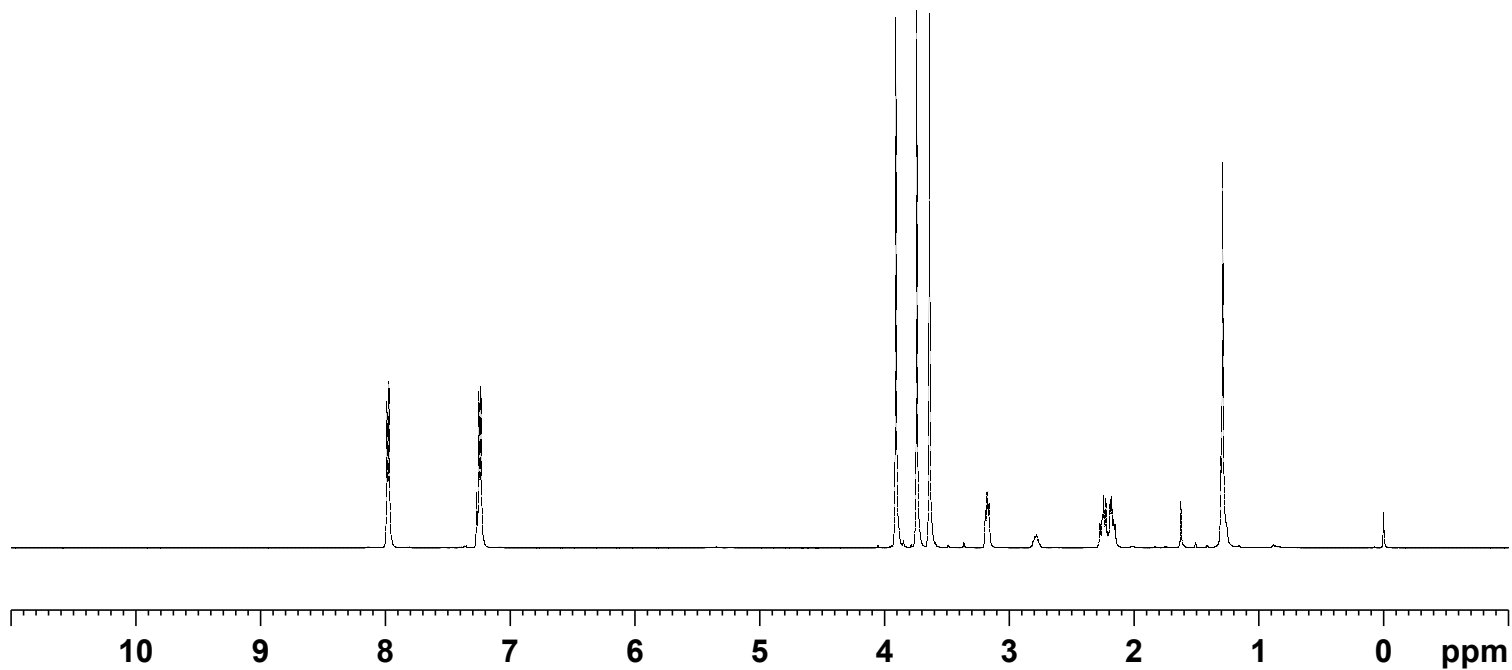

Current Data Parameters  
 NAME 500M-2020xia  
 EXPNO 193  
 PROCNO 1

F2 - Acquisition Parameters  
 Date\_ 20211125  
 Time 9.08  
 INSTRUM spect  
 PROBHD 5 mm CPPBBO BB  
 PULPROG zg30  
 TD 65536  
 SOLVENT CDCl3  
 NS 16  
 DS 2  
 SWH 10000.000 Hz  
 FIDRES 0.152588 Hz  
 AQ 3.2767999 sec  
 RG 31.72  
 DW 50.000 usec  
 DE 6.50 usec  
 TE 0 K  
 D1 1.00000000 sec  
 D11 0 sec  
 TD0 1

==== CHANNEL f1 =====  
 SFO1 500.1330885 MHz  
 NUC1 1H  
 P1 10.59 usec  
 PLW1 20.00000000 W

==== CHANNEL f2 =====  
 SFO2 500.1330885 MHz  
 NUC2 off  
 CPDPRG[2]  
 PCPD2 0 usec  
 PLW2 0 W  
 PLW12 0 W  
 PLW13 0 W

F2 - Processing parameters  
 SI 65536  
 SF 500.1300067 MHz  
 WDW EM  
 SSB 0  
 LB 0.30 Hz  
 GB 0  
 PC 1.00

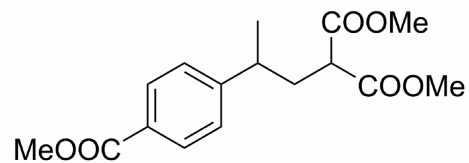

**2k-H**

7.988  
7.971  
7.251  
7.235

3.908  
3.741  
3.639  
3.194  
3.182  
3.177  
3.164  
2.810  
2.793  
2.780  
2.767  
2.284  
2.273  
2.266  
2.256  
2.245  
2.238  
2.227  
2.208  
2.196  
2.190  
2.177  
2.169  
2.162  
2.149

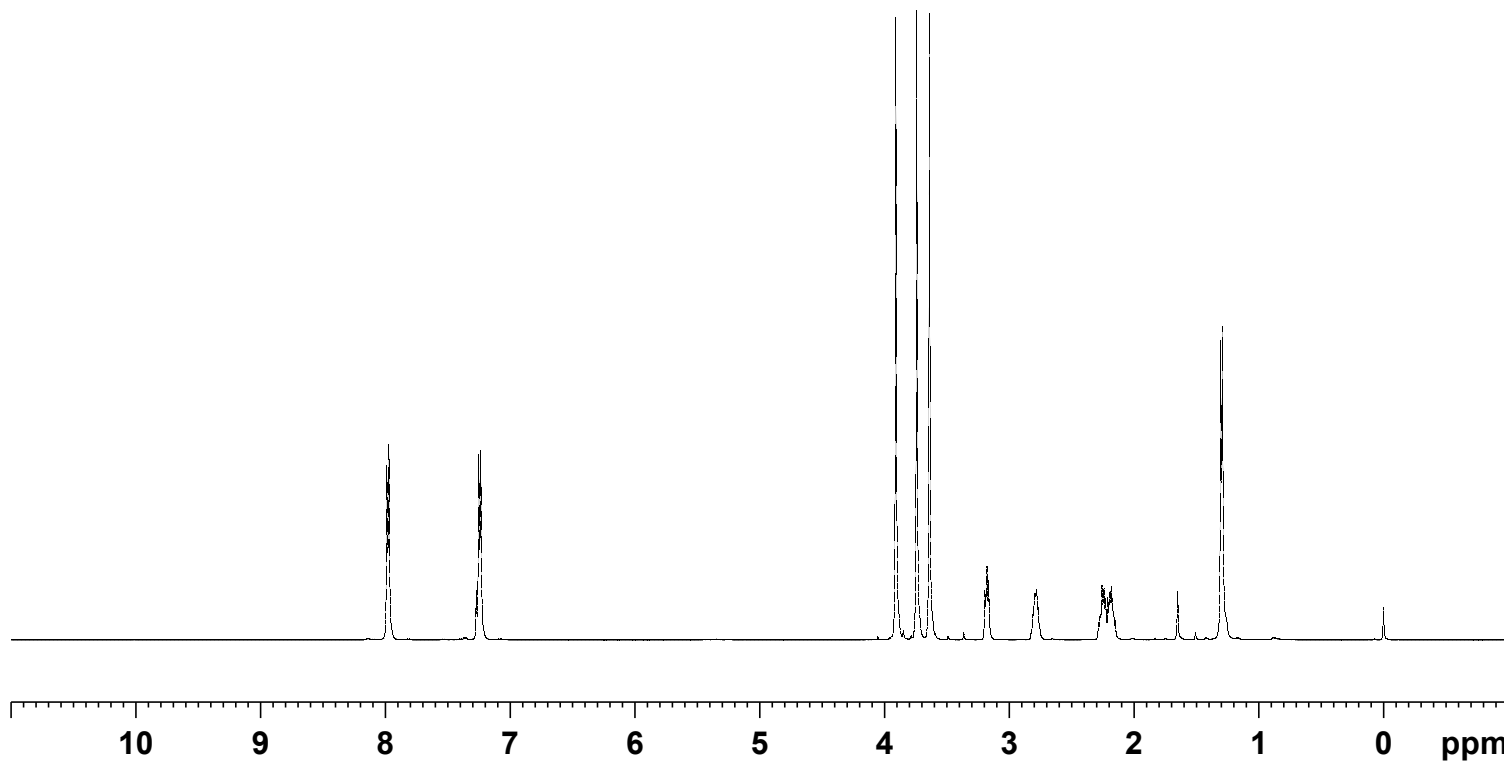

Current Data Parameters  
 NAME 500M-2020xia  
 EXPNO 194  
 PROCNO 1

F2 - Acquisition Parameters  
 Date\_ 20211125  
 Time 10.39  
 INSTRUM spect  
 PROBHD 5 mm CPPBBO BB  
 PULPROG zg30  
 TD 65536  
 SOLVENT CDCl3  
 NS 16  
 DS 2  
 SWH 10000.000 Hz  
 FIDRES 0.152588 Hz  
 AQ 3.2767999 sec  
 RG 49.27  
 DW 50.000 usec  
 DE 6.50 usec  
 TE 0 K  
 D1 1.00000000 sec  
 D11 0 sec  
 TD0 1

==== CHANNEL f1 =====  
 SFO1 500.1330885 MHz  
 NUC1 1H  
 P1 10.59 usec  
 PLW1 20.00000000 W

==== CHANNEL f2 =====  
 SFO2 500.1330885 MHz  
 NUC2 off  
 CPDPRG[2]  
 PCPD2 0 usec  
 PLW2 0 W  
 PLW12 0 W  
 PLW13 0 W

F2 - Processing parameters  
 SI 65536  
 SF 500.1300053 MHz  
 WDW EM  
 SSB 0  
 LB 0.30 Hz  
 GB 0  
 PC 1.00

2.00  
2.23  
3.12  
3.03  
3.02  
0.99  
1.01  
2.07  
3.33



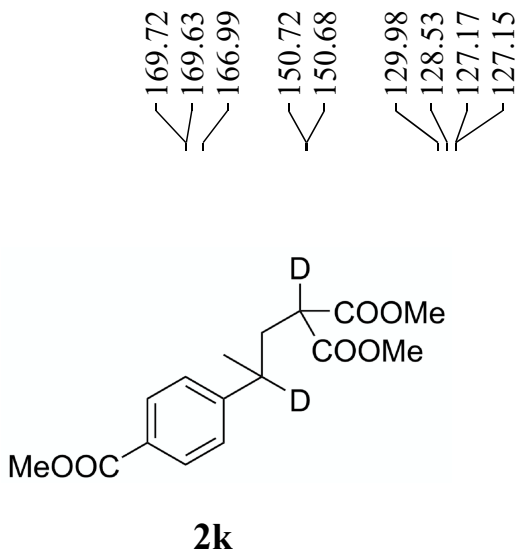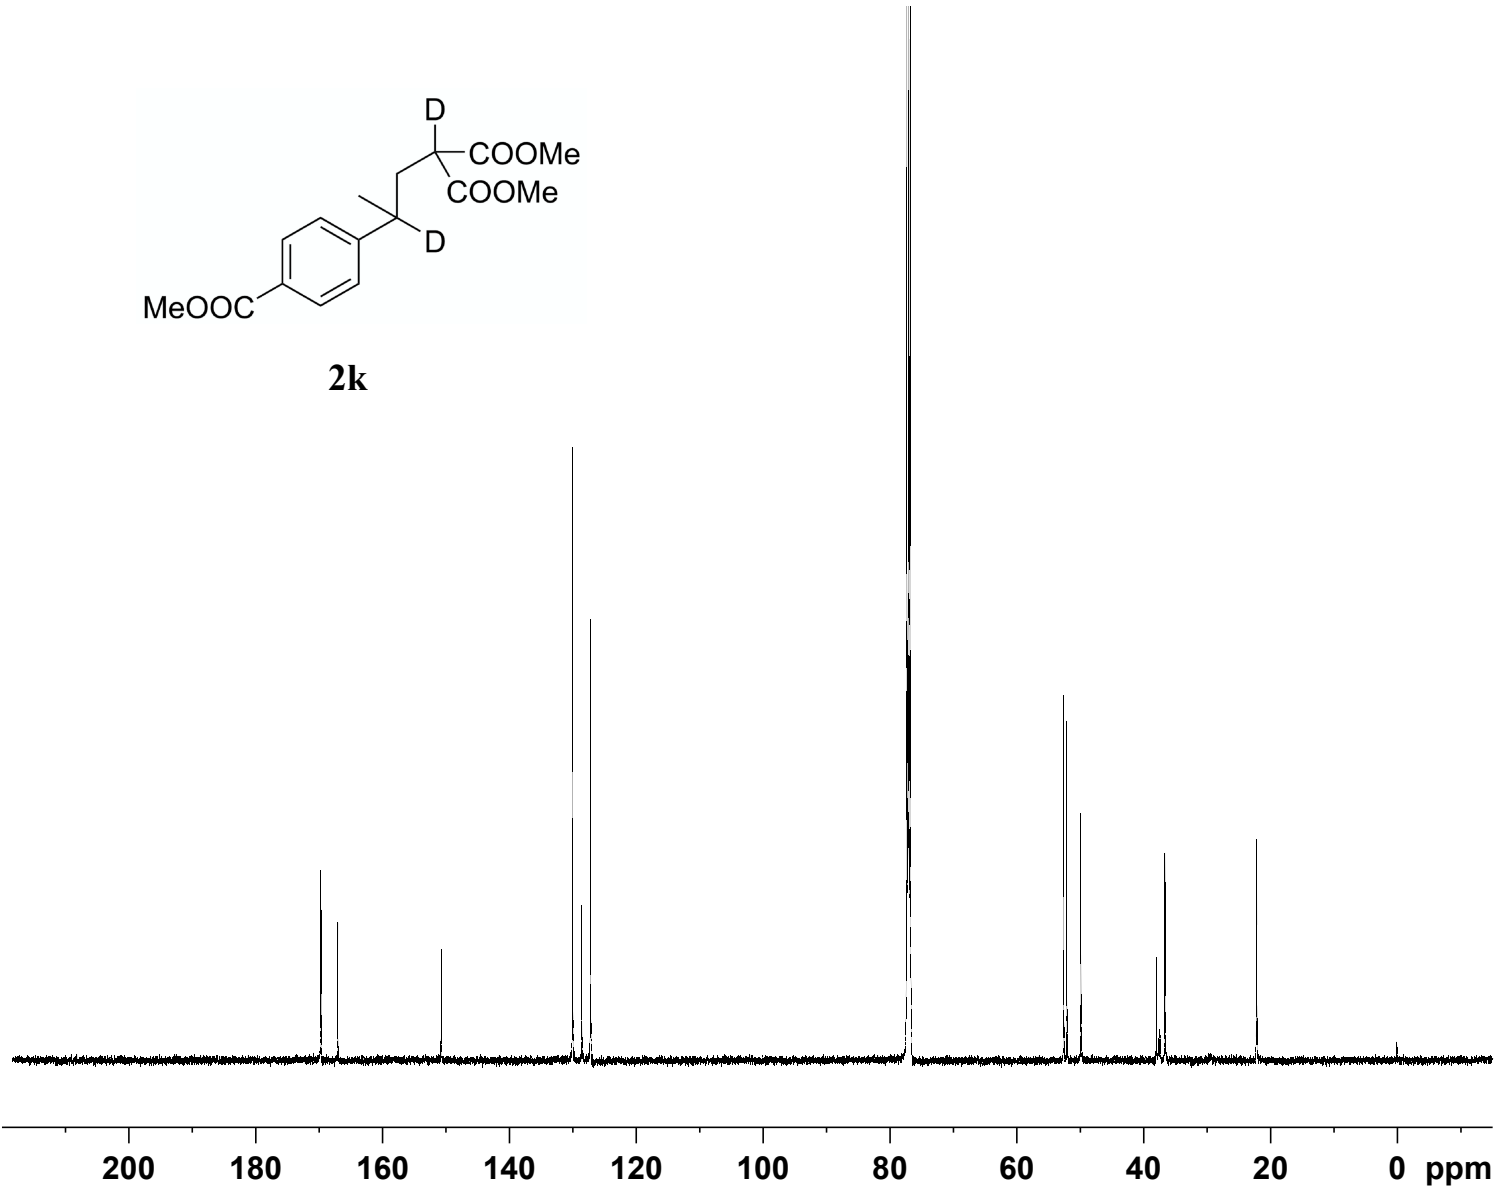

```

Current Data Parameters
NAME      500M-2020xia
EXPNO     192
PROCNO    1

F2 - Acquisition Parameters
Date_     20211124
Time      21.11
INSTRUM   spect
PROBHD    5 mm CPPBBO BB
PULPROG   zgpg30
TD         65536
SOLVENT   CDCl3
NS         1024
DS         4
SWH        29761.904 Hz
FIDRES     0.454131 Hz
AQ         1.1010048 sec
RG         192.89
DW         16.800 usec
DE         18.00 usec
TE         0 K
D1         2.00000000 sec
D11        0.03000000 sec
TD0        1

===== CHANNEL f1 =====
SFO1      125.7703637 MHz
NUC1       13C
P1         9.80 usec
PLW1       57.00000000 W

===== CHANNEL f2 =====
SFO2      500.1320005 MHz
NUC2       1H
CPDPRG[2] waltz16
PCPD2     80.00 usec
PLW2      20.00000000 W
PLW12     0.35778001 W
PLW13     0.22898000 W

F2 - Processing parameters
SI         32768
SF         125.7577885 MHz
WDW        EM
SSB        0
LB         1.00 Hz
GB         0
PC         1.40
  
```

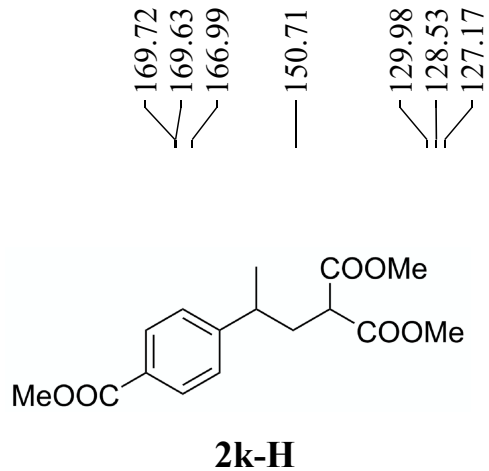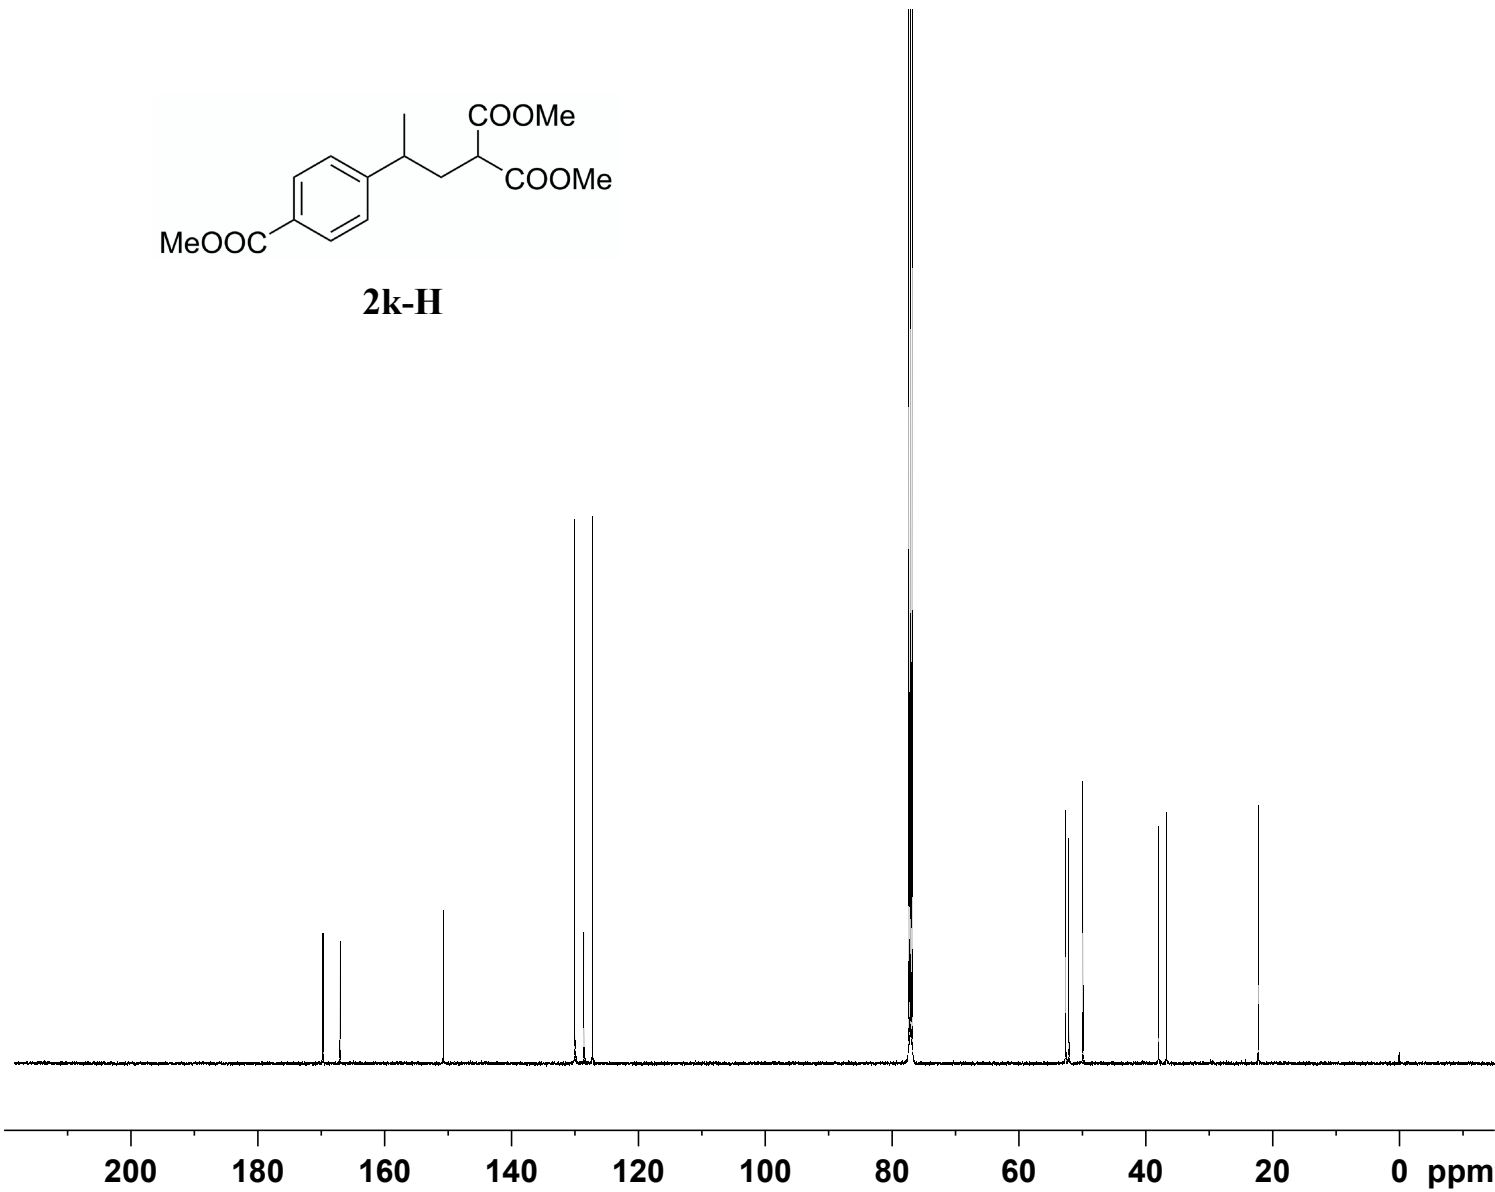

Current Data Parameters  
 NAME 500M-2020xia  
 EXPNO 190  
 PROCNO 1

F2 - Acquisition Parameters  
 Date\_ 20211124  
 Time 20.12  
 INSTRUM spect  
 PROBHD 5 mm CPPBBO BB  
 PULPROG zgpg30  
 TD 65536  
 SOLVENT CDCl3  
 NS 1024  
 DS 4  
 SWH 29761.904 Hz  
 FIDRES 0.454131 Hz  
 AQ 1.1010048 sec  
 RG 192.89  
 DW 16.800 usec  
 DE 18.00 usec  
 TE 0 K  
 D1 2.0000000 sec  
 D11 0.0300000 sec  
 TD0 1

==== CHANNEL f1 =====  
 SFO1 125.7703637 MHz  
 NUC1 13C  
 P1 9.80 usec  
 PLW1 57.0000000 W

==== CHANNEL f2 =====  
 SFO2 500.1320005 MHz  
 NUC2 1H  
 CPDPRG[2] waltz16  
 PCPD2 80.00 usec  
 PLW2 20.0000000 W  
 PLW12 0.35778001 W  
 PLW13 0.22898000 W

F2 - Processing parameters  
 SI 32768  
 SF 125.7577885 MHz  
 WDW EM  
 SSB 0  
 LB 1.00 Hz  
 GB 0  
 PC 1.40



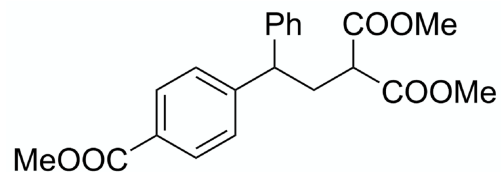

**21-H**

7.964  
7.951  
7.948  
7.312  
7.296  
7.282  
7.217  
7.209  
7.203  
4.028  
4.014  
3.999  
3.884  
3.881  
3.878  
3.705  
3.702  
3.696  
3.690  
3.276  
3.273  
3.270  
3.261  
3.247  
2.698  
2.695  
2.692  
2.682  
2.667

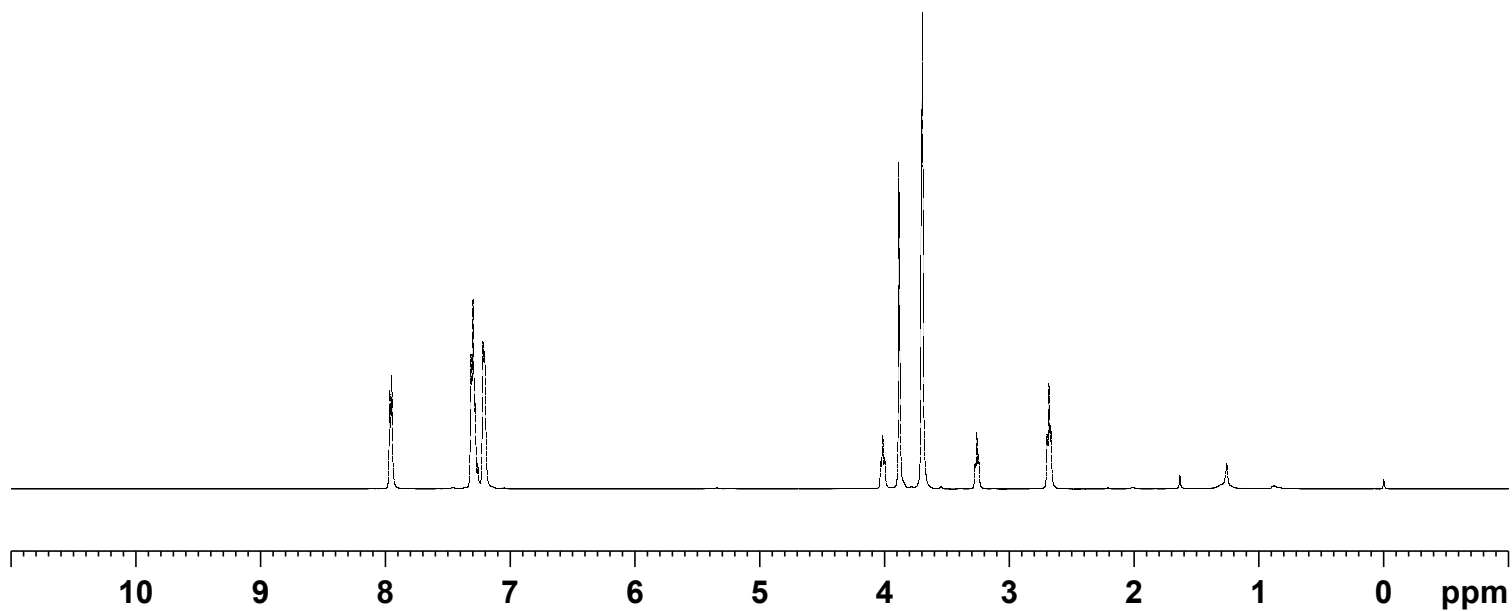

Current Data Parameters  
NAME 500M-2020xia  
EXPNO 210  
PROCNO 1

F2 - Acquisition Parameters  
Date\_ 20211221  
Time 2.36  
INSTRUM spect  
PROBHD 5 mm CPPBBO BB  
PULPROG zg30  
TD 65536  
SOLVENT CDCl3  
NS 16  
DS 2  
SWH 10000.000 Hz  
FIDRES 0.152588 Hz  
AQ 3.2767999 sec  
RG 31.72  
DW 50.000 usec  
DE 6.50 usec  
TE 298.2 K  
D1 1.00000000 sec  
D11 0 sec  
TD0 1

==== CHANNEL f1 =====  
SFO1 500.1330885 MHz  
NUC1 1H  
P1 11.25 usec  
PLW1 20.00000000 W

==== CHANNEL f2 =====  
SFO2 500.1330885 MHz  
NUC2 off  
CPDPRG[2]  
PCPD2 0 usec  
PLW2 0 W  
PLW12 0 W  
PLW13 0 W

F2 - Processing parameters  
SI 65536  
SF 500.1300120 MHz  
WDW EM  
SSB 0  
LB 0.30 Hz  
GB 0  
PC 1.00

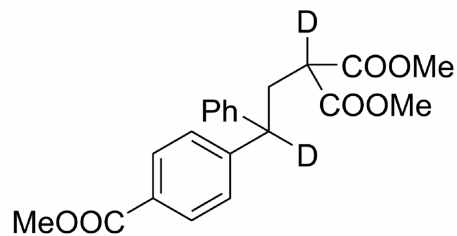

21

169.54  
166.86  
148.64  
142.31  
129.98  
128.81  
128.58  
127.89  
127.86  
126.95

52.63  
52.06  
49.84  
34.08

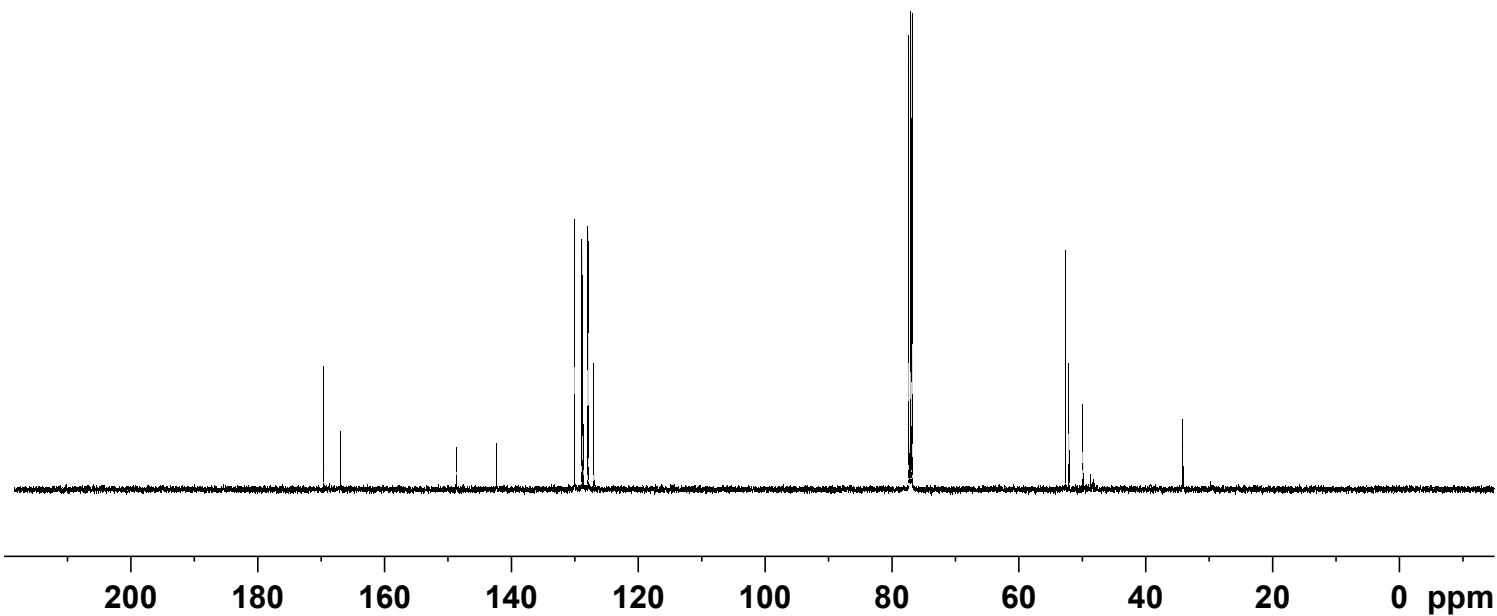

Current Data Parameters  
NAME 500M-2020xia  
EXPNO 213  
PROCNO 1

F2 - Acquisition Parameters  
Date\_ 20211221  
Time 3.10  
INSTRUM spect  
PROBHD 5 mm CPPBBO BB  
PULPROG zgpg30  
TD 65536  
SOLVENT CDC13  
NS 20  
DS 4  
SWH 29761.904 Hz  
FIDRES 0.454131 Hz  
AQ 1.1010048 sec  
RG 192.89  
DW 16.800 usec  
DE 18.00 usec  
TE 298.2 K  
D1 2.00000000 sec  
D11 0.03000000 sec  
TD0 1

==== CHANNEL f1 =====  
SFO1 125.7703637 MHz  
NUC1 13C  
P1 10.50 usec  
PLW1 57.00000000 W

==== CHANNEL f2 =====  
SFO2 500.1320005 MHz  
NUC2 1H  
CPDPRG[2] waltz16  
PCPD2 80.00 usec  
PLW2 20.00000000 W  
PLW12 0.39550999 W  
PLW13 0.25312999 W

F2 - Processing parameters  
SI 32768  
SF 125.7577885 MHz  
WDW EM  
SSB 0  
LB 1.00 Hz  
GB 0  
PC 1.40

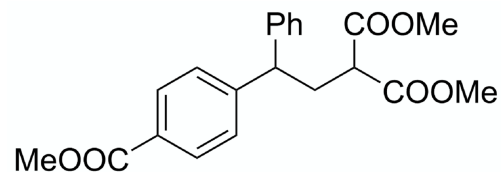

2I-H

169.54  
166.86  
148.68  
142.36  
129.98  
128.81  
128.57  
127.91  
127.89  
126.95

52.63  
52.06  
49.86  
48.66  
34.17

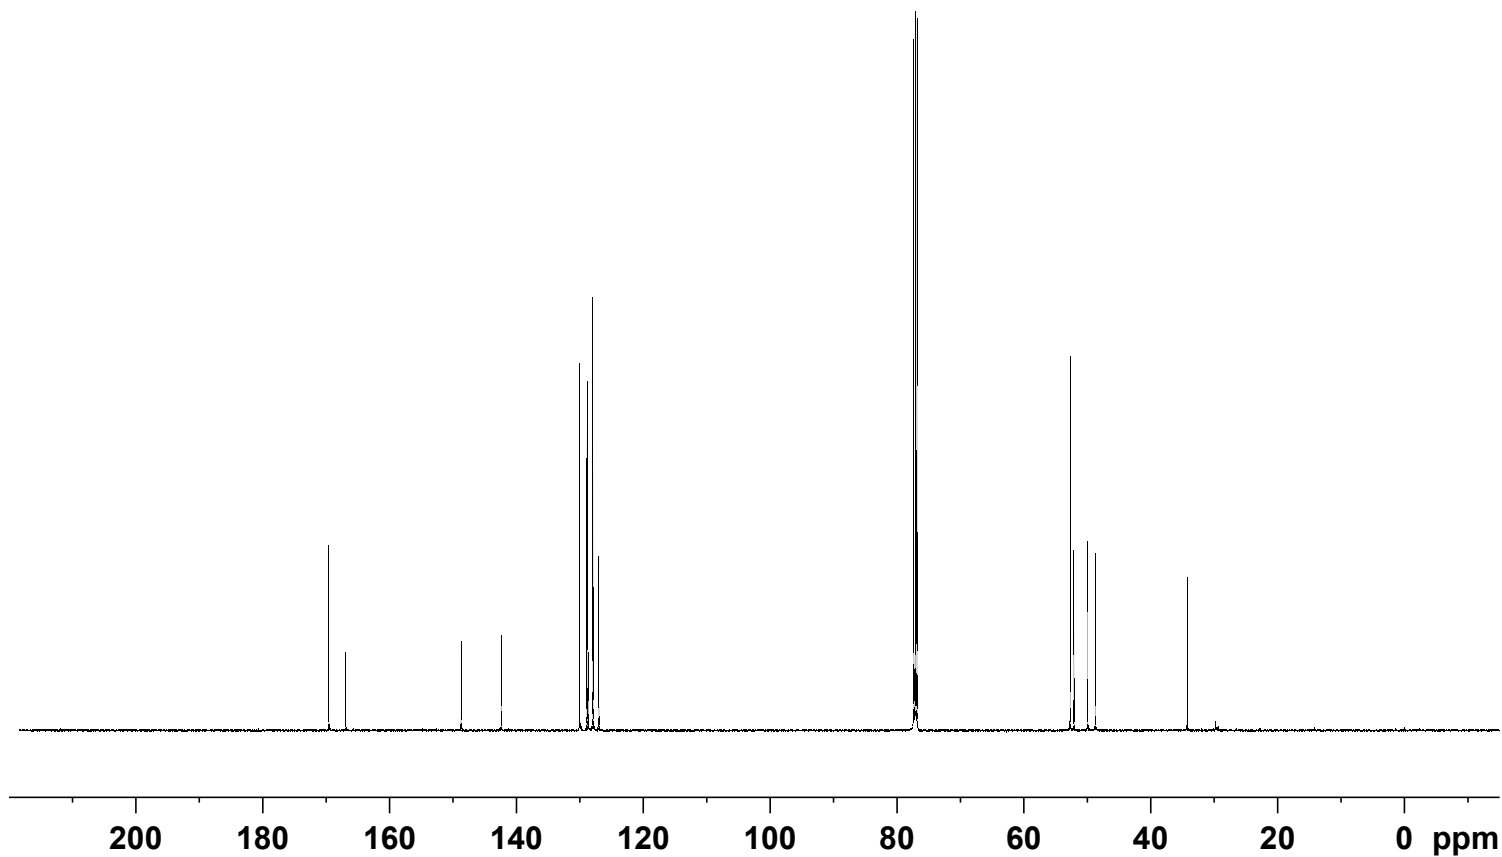

Current Data Parameters  
NAME 500M-2020xia  
EXPNO 211  
PROCNO 1

F2 - Acquisition Parameters  
Date\_ 20211221  
Time 3.04  
INSTRUM spect  
PROBHD 5 mm CPPBBO BB  
PULPROG zgpg30  
TD 65536  
SOLVENT CDCl3  
NS 512  
DS 4  
SWH 29761.904 Hz  
FIDRES 0.454131 Hz  
AQ 1.1010048 sec  
RG 192.89  
DW 16.800 usec  
DE 18.00 usec  
TE 298.2 K  
D1 2.00000000 sec  
D11 0.03000000 sec  
TD0 1

==== CHANNEL f1 =====  
SFO1 125.7703637 MHz  
NUC1 13C  
P1 10.50 usec  
PLW1 57.00000000 W

==== CHANNEL f2 =====  
SFO2 500.1320005 MHz  
NUC2 1H  
CPDPRG[2] waltz16  
PCPD2 80.00 usec  
PLW2 20.00000000 W  
PLW12 0.39550999 W  
PLW13 0.25312999 W

F2 - Processing parameters  
SI 32768  
SF 125.7577885 MHz  
WDW EM  
SSB 0  
LB 1.00 Hz  
GB 0  
PC 1.40

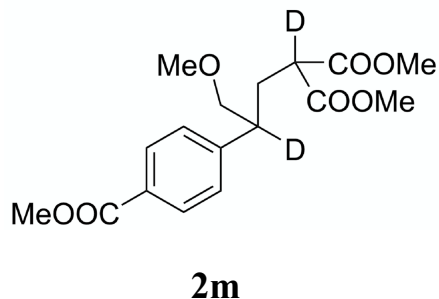

7.994  
7.978  
7.274  
7.261

3.906  
3.732  
3.612  
3.518  
3.294  
3.246  
3.234  
3.227  
3.216  
2.978  
2.968  
2.958  
2.947  
2.472  
2.453  
2.444  
2.425  
2.193  
2.182  
2.171  
2.165  
2.154

Current Data Parameters  
NAME 500M-2020xia  
EXPNO 230  
PROCNO 1

F2 - Acquisition Parameters  
Date\_ 20220207  
Time 21.08  
INSTRUM spect  
PROBHD 5 mm CPPBBO BB  
PULPROG zg30  
TD 65536  
SOLVENT CDCl3  
NS 16  
DS 2  
SWH 10000.000 Hz  
FIDRES 0.152588 Hz  
AQ 3.2767999 sec  
RG 31.72  
DW 50.000 usec  
DE 6.50 usec  
TE 298.2 K  
D1 1.00000000 sec  
D11 0 sec  
TD0 1

==== CHANNEL f1 =====  
SFO1 500.1330885 MHz  
NUC1 1H  
P1 11.25 usec  
PLW1 20.00000000 W

==== CHANNEL f2 =====  
SFO2 500.1330885 MHz  
NUC2 off  
CPDPRG[2]  
PCPD2 0 usec  
PLW2 0 W  
PLW12 0 W  
PLW13 0 W

F2 - Processing parameters  
SI 65536  
SF 500.1300114 MHz  
WDW EM  
SSB 0  
LB 0.30 Hz  
GB 0  
PC 1.00

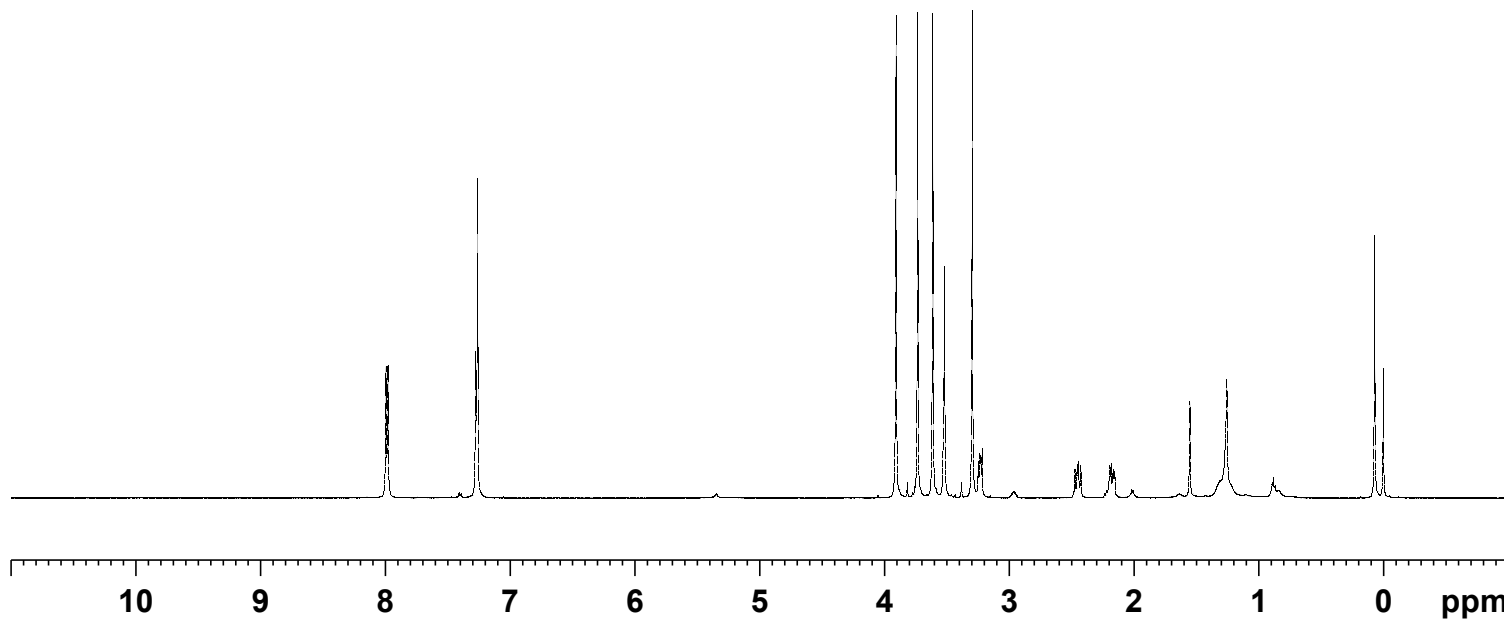

2.00  
3.30

3.03  
3.01  
3.01  
2.01  
2.87  
1.11  
0.19  
0.99  
1.16

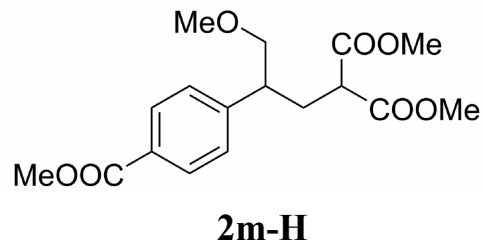

7.994  
7.978  
7.274  
7.260

3.906  
3.733  
3.611  
3.529  
3.516  
3.295  
3.249  
3.237  
3.230  
3.217  
2.978  
2.968  
2.958  
2.947  
2.465  
2.455  
2.446  
2.437  
2.211  
2.200  
2.191  
2.181  
2.172

Current Data Parameters  
NAME 500M-2022  
EXPNO 1  
PROCNO 1

F2 - Acquisition Parameters  
Date\_ 20220216  
Time 21.39  
INSTRUM spect  
PROBHD 5 mm CPPBBO BB  
PULPROG zg30  
TD 65536  
SOLVENT CDCl3  
NS 16  
DS 2  
SWH 10000.000 Hz  
FIDRES 0.152588 Hz  
AQ 3.2767999 sec  
RG 55.37  
DW 50.000 usec  
DE 6.50 usec  
TE 298.2 K  
D1 1.00000000 sec  
D11 0 sec  
TD0 1

==== CHANNEL f1 =====  
SFO1 500.1330885 MHz  
NUC1 1H  
P1 11.25 usec  
PLW1 20.00000000 W

==== CHANNEL f2 =====  
SFO2 500.1330885 MHz  
NUC2 off  
CPDPRG[2]  
PCPD2 0 usec  
PLW2 0 W  
PLW12 0 W  
PLW13 0 W

F2 - Processing parameters  
SI 65536  
SF 500.1300114 MHz  
WDW EM  
SSB 0  
LB 0.30 Hz  
GB 0  
PC 1.00

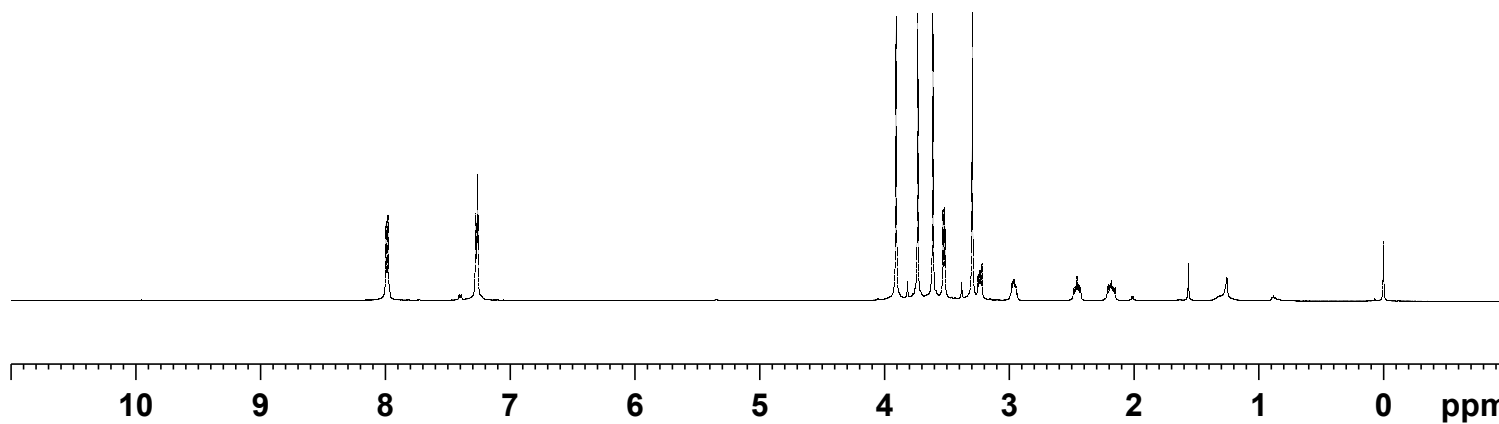

2.13

2.60

3.04

2.95

2.84

1.94

2.96

1.09

1.04

1.00

1.09



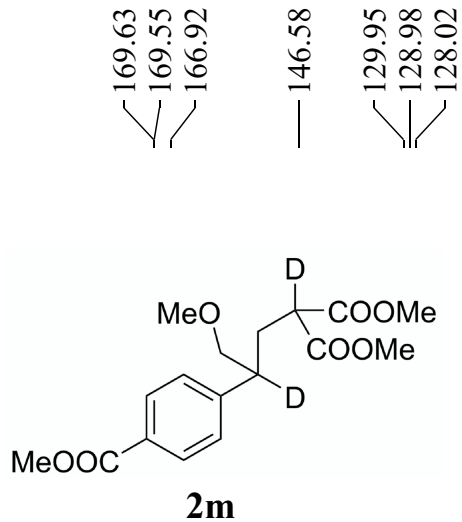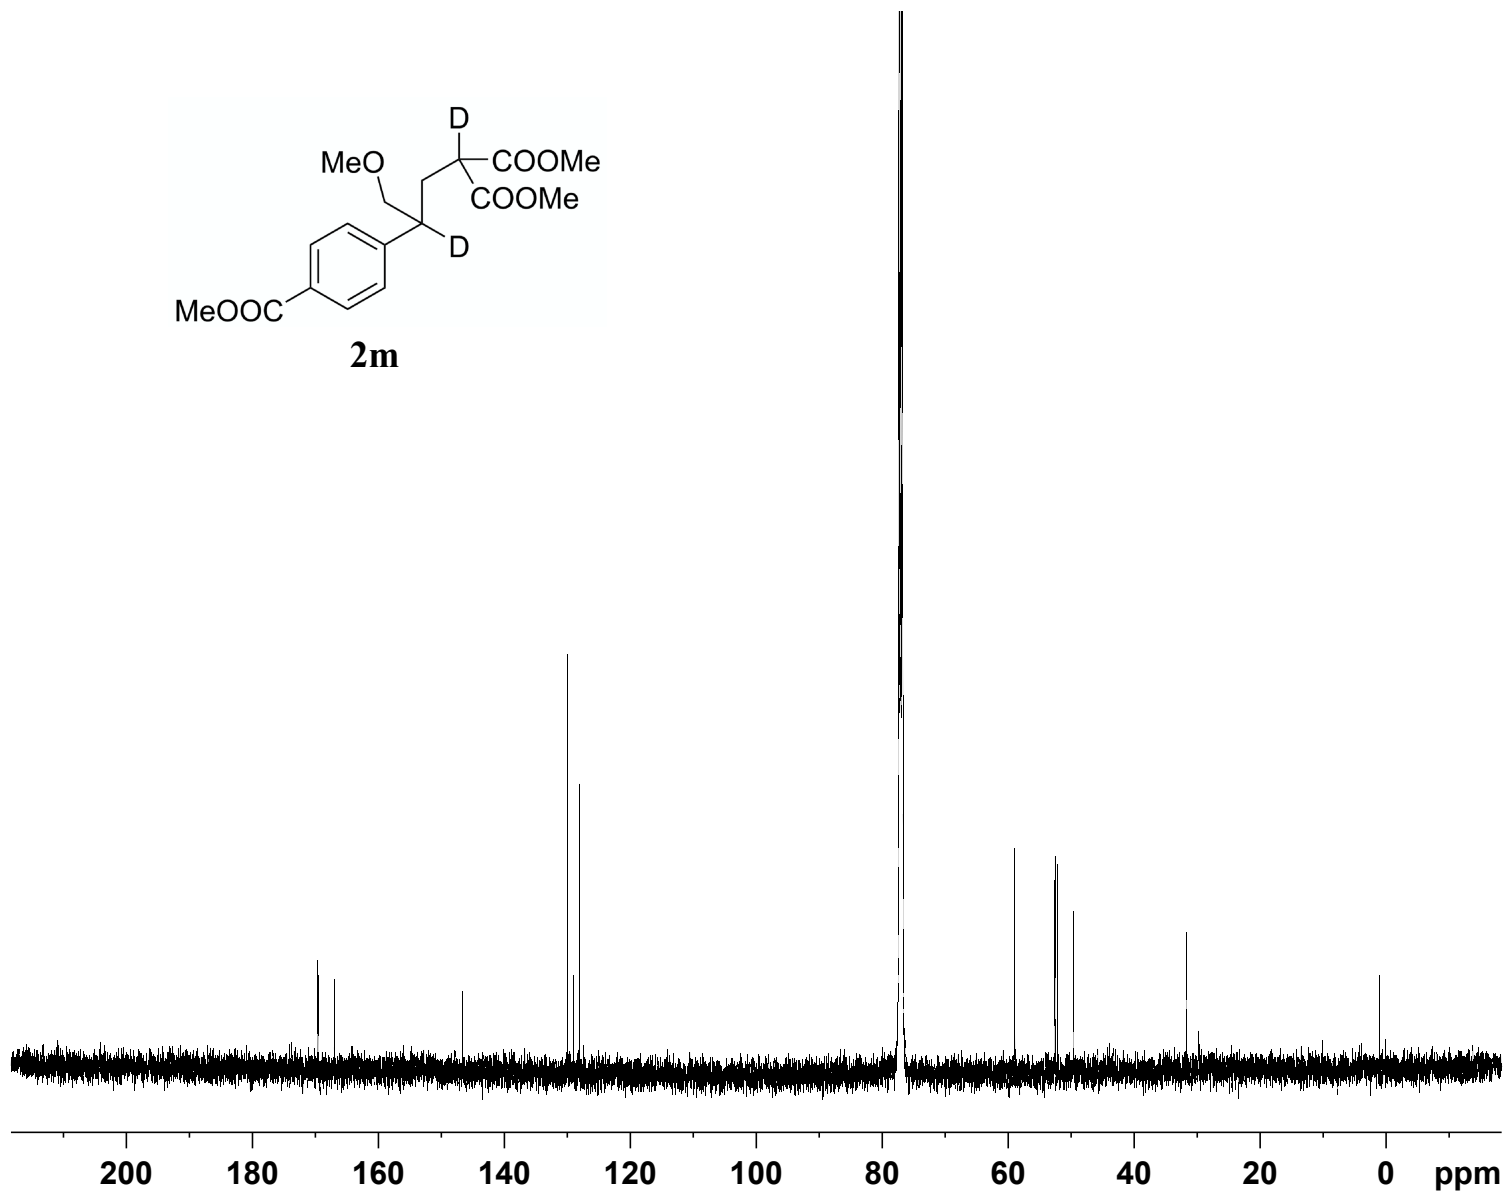

Current Data Parameters  
 NAME 500M-2020xia  
 EXPNO 238  
 PROCNO 1

F2 - Acquisition Parameters  
 Date\_ 20220208  
 Time 14.51  
 INSTRUM spect  
 PROBHD 5 mm CPPBBO BB  
 PULPROG zgpg30  
 TD 65536  
 SOLVENT CDCl3  
 NS 1024  
 DS 4  
 SWH 29761.904 Hz  
 FIDRES 0.454131 Hz  
 AQ 1.1010048 sec  
 RG 192.89  
 DW 16.800 usec  
 DE 18.00 usec  
 TE 298.2 K  
 D1 2.00000000 sec  
 D11 0.03000000 sec  
 TD0 1

==== CHANNEL f1 =====  
 SFO1 125.7703637 MHz  
 NUC1 13C  
 P1 10.50 usec  
 PLW1 57.00000000 W

==== CHANNEL f2 =====  
 SFO2 500.1320005 MHz  
 NUC2 1H  
 CPDPRG[2] waltz16  
 PCPD2 80.00 usec  
 PLW2 20.00000000 W  
 PLW12 0.39550999 W  
 PLW13 0.25312999 W

F2 - Processing parameters  
 SI 32768  
 SF 125.7577885 MHz  
 WDW EM  
 SSB 0  
 LB 1.00 Hz  
 GB 0  
 PC 1.40

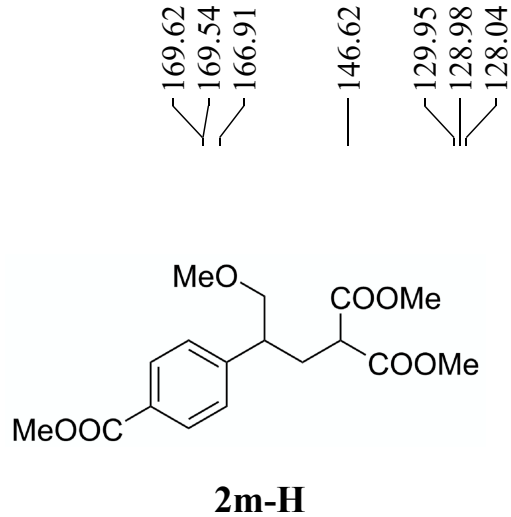

$58.91$   
 $52.57$   
 $52.53$   
 $52.08$   
 $49.61$   
 $43.88$   
 $31.71$

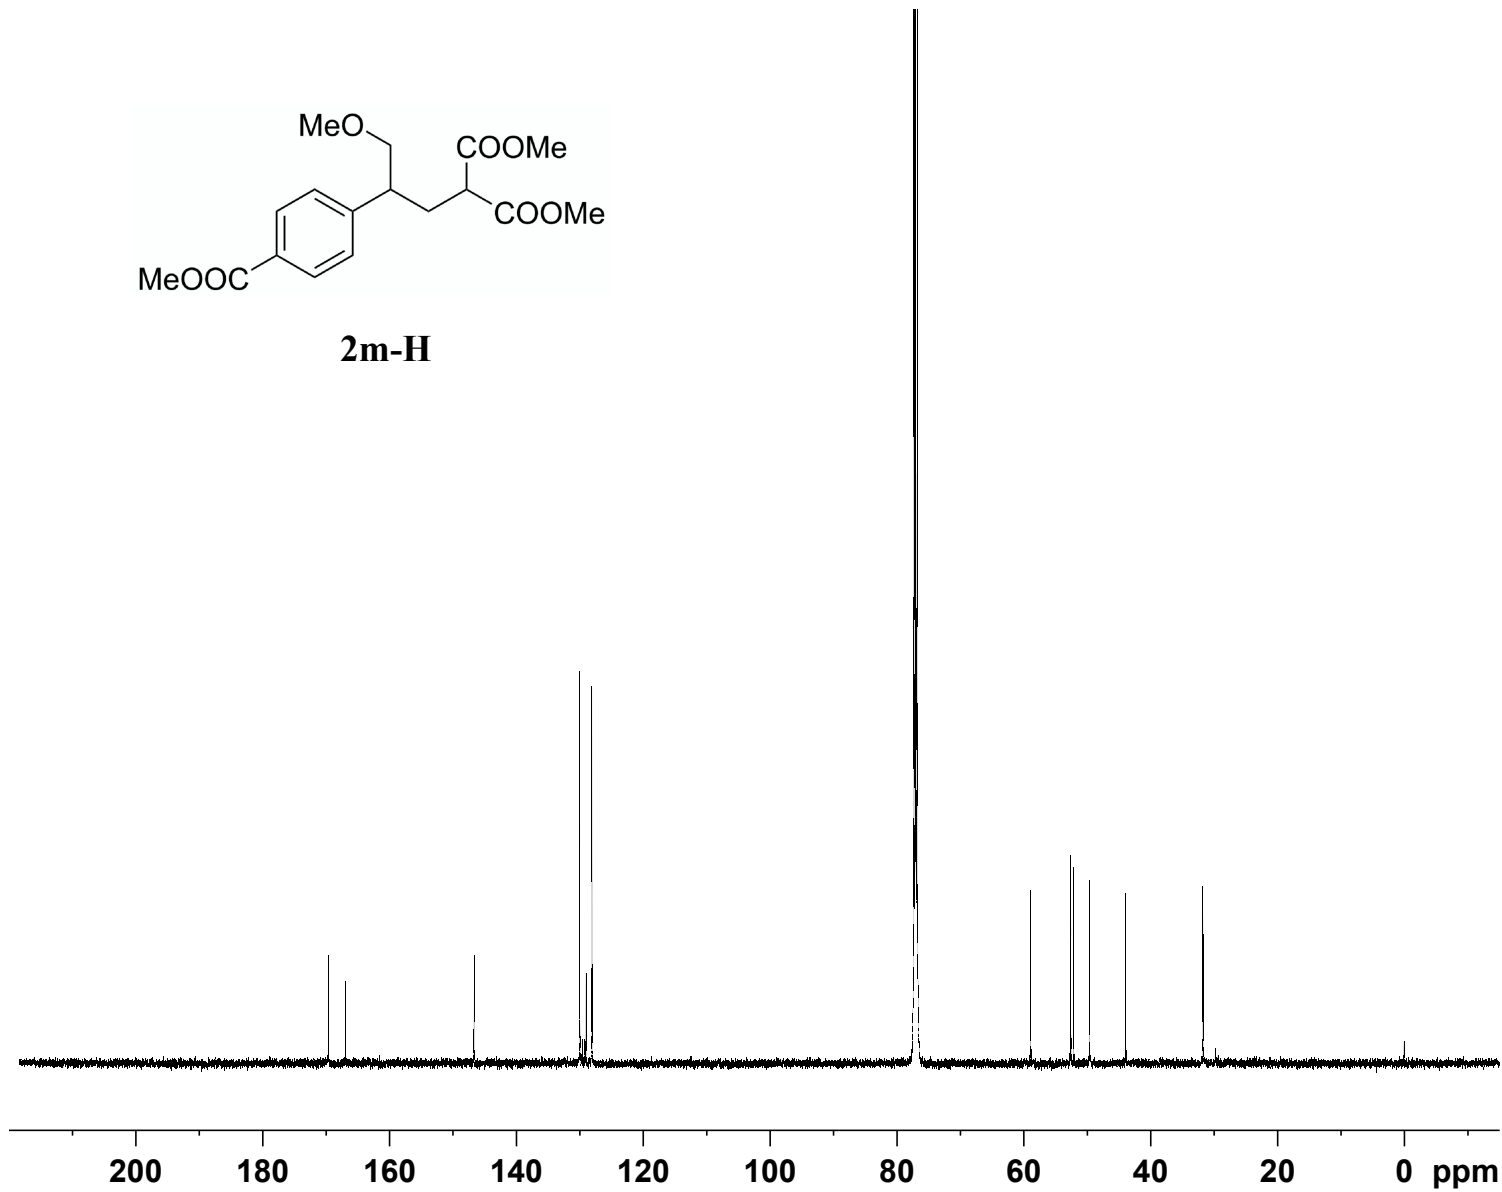

Current Data Parameters  
 NAME 500M-2022  
 EXPNO 2  
 PROCNO 1

F2 - Acquisition Parameters  
 Date\_ 20220216  
 Time 22.33  
 INSTRUM spect  
 PROBHD 5 mm CPPBBO BB  
 PULPROG zgpg30  
 TD 65536  
 SOLVENT CDC13  
 NS 1024  
 DS 4  
 SWH 29761.904 Hz  
 FIDRES 0.454131 Hz  
 AQ 1.1010048 sec  
 RG 192.89  
 DW 16.800 usec  
 DE 18.00 usec  
 TE 298.2 K  
 D1 2.00000000 sec  
 D11 0.03000000 sec  
 TD0 1

==== CHANNEL f1 =====  
 SFO1 125.7703637 MHz  
 NUC1 13C  
 P1 10.50 usec  
 PLW1 57.00000000 W

==== CHANNEL f2 =====  
 SFO2 500.1320005 MHz  
 NUC2 1H  
 CPDPRG[2] waltz16  
 PCPD2 80.00 usec  
 PLW2 20.00000000 W  
 PLW12 0.39550999 W  
 PLW13 0.25312999 W

F2 - Processing parameters  
 SI 32768  
 SF 125.7577885 MHz  
 WDW EM  
 SSB 0  
 LB 1.00 Hz  
 GB 0  
 PC 1.40

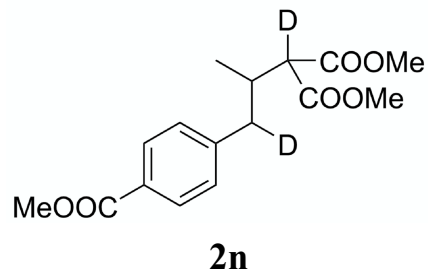

7.972  
7.955  
7.269  
7.265  
7.253

3.906  
3.750  
3.741  
3.328  
3.313  
2.898  
2.889  
2.865  
2.857  
2.602  
2.588  
2.575  
2.562  
2.549  
2.502  
2.483  
2.471  
2.452  
0.942  
0.929

Current Data Parameters  
NAME 500M-2020xia  
EXPNO 220  
PROCNO 1

F2 - Acquisition Parameters  
Date\_ 20220105  
Time 17.04  
INSTRUM spect  
PROBHD 5 mm CPPBBO BB  
PULPROG zg30  
TD 65536  
SOLVENT CDCl3  
NS 16  
DS 2  
SWH 10000.000 Hz  
FIDRES 0.152588 Hz  
AQ 3.2767999 sec  
RG 31.72  
DW 50.000 usec  
DE 6.50 usec  
TE 298.2 K  
D1 1.00000000 sec  
D11 0 sec  
TD0 1

==== CHANNEL f1 =====  
SFO1 500.1330885 MHz  
NUC1 1H  
P1 11.25 usec  
PLW1 20.00000000 W

==== CHANNEL f2 =====  
SFO2 500.1330885 MHz  
NUC2 off  
CPDPRG[2]  
PCPD2 0 usec  
PLW2 0 W  
PLW12 0 W  
PLW13 0 W

F2 - Processing parameters  
SI 65536  
SF 500.1300098 MHz  
WDW EM  
SSB 0  
LB 0.30 Hz  
GB 0  
PC 1.00

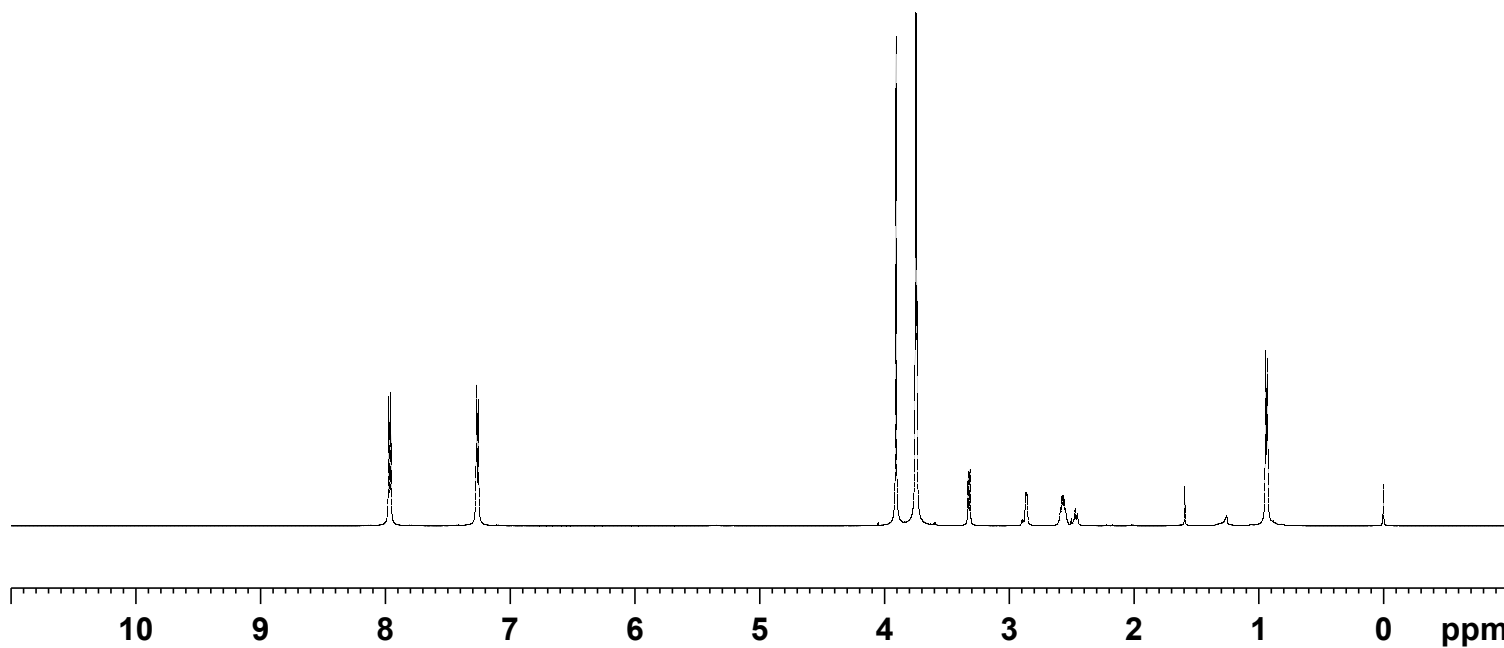

2.00  
2.33

3.05  
6.08  
0.81  
0.72  
0.98  
0.43

3.10

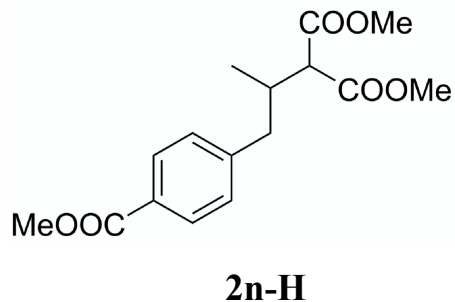

7.972  
 7.955  
 7.269  
 7.265  
 7.253

3.906  
 3.750  
 3.740  
 3.327  
 3.313  
 2.899  
 2.889  
 2.872  
 2.863  
 2.604  
 2.590  
 2.575  
 2.562  
 2.548  
 2.502  
 2.484  
 2.476  
 2.458  
 0.945  
 0.932

Current Data Parameters  
 NAME 500M-2020xia  
 EXPNO 218  
 PROCNO 1

F2 - Acquisition Parameters  
 Date\_ 20220105  
 Time 16.32  
 INSTRUM spect  
 PROBHD 5 mm CPPBBO BB  
 PULPROG zg30  
 TD 65536  
 SOLVENT CDCl3  
 NS 16  
 DS 2  
 SWH 10000.000 Hz  
 FIDRES 0.152588 Hz  
 AQ 3.2767999 sec  
 RG 31.72  
 DW 50.000 usec  
 DE 6.50 usec  
 TE 298.2 K  
 D1 1.00000000 sec  
 D11 0 sec  
 TD0 1

===== CHANNEL f1 =====  
 SFO1 500.1330885 MHz  
 NUC1 1H  
 P1 11.25 usec  
 PLW1 20.00000000 W

===== CHANNEL f2 =====  
 SFO2 500.1330885 MHz  
 NUC2 off  
 CPDPRG[2]  
 PCPD2 0 usec  
 PLW2 0 W  
 PLW12 0 W  
 PLW13 0 W

F2 - Processing parameters  
 SI 65536  
 SF 500.1300103 MHz  
 WDW EM  
 SSB 0  
 LB 0.30 Hz  
 GB 0  
 PC 1.00

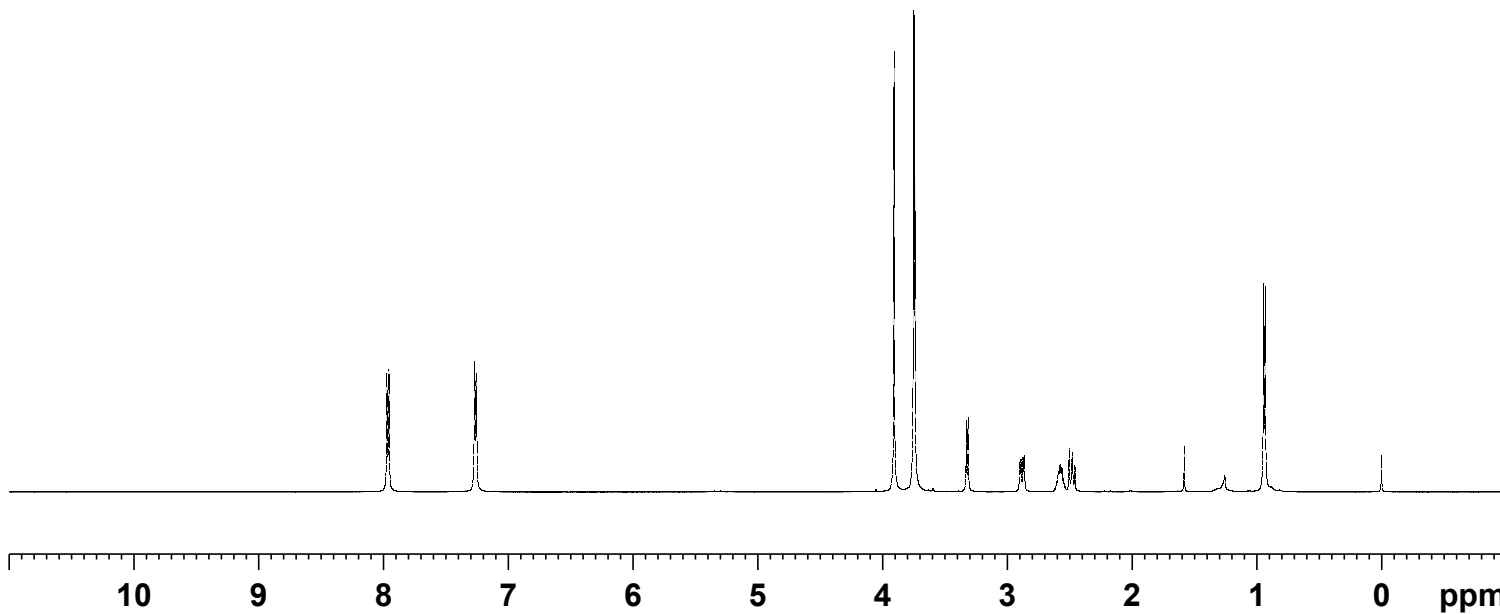

2.00

2.39

3.08

6.06

0.98

0.99

1.00

1.03

3.19

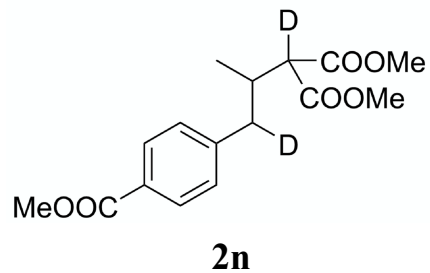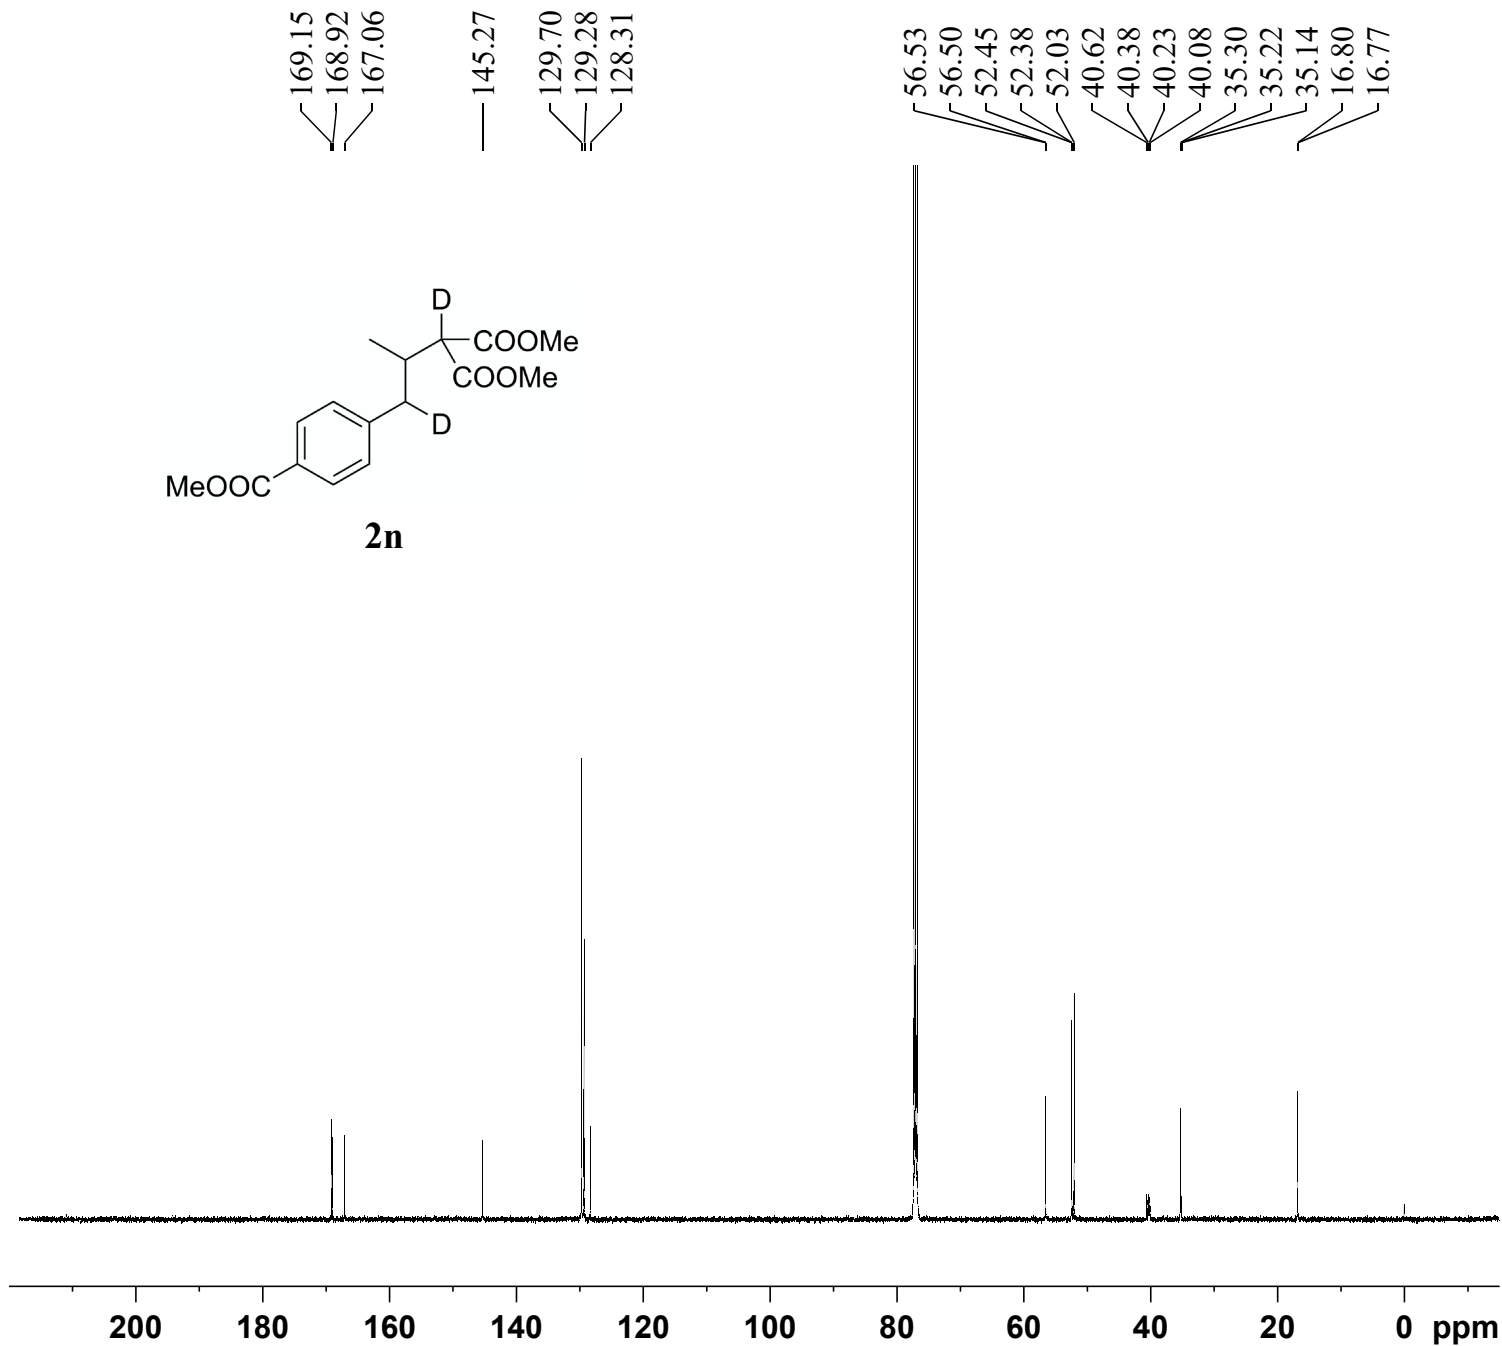

Current Data Parameters  
 NAME 500M-2020xia  
 EXPNO 221  
 PROCNO 1

F2 - Acquisition Parameters  
 Date\_ 20220105  
 Time 17.32  
 INSTRUM spect  
 PROBHD 5 mm CPPBBO BB  
 PULPROG zgpg30  
 TD 65536  
 SOLVENT CDCl3  
 NS 512  
 DS 4  
 SWH 29761.904 Hz  
 FIDRES 0.454131 Hz  
 AQ 1.1010048 sec  
 RG 192.89  
 DW 16.800 usec  
 DE 18.00 usec  
 TE 298.2 K  
 D1 2.00000000 sec  
 D11 0.03000000 sec  
 TD0 1

==== CHANNEL f1 =====  
 SFO1 125.7703637 MHz  
 NUC1 13C  
 P1 10.50 usec  
 PLW1 57.00000000 W

==== CHANNEL f2 =====  
 SFO2 500.1320005 MHz  
 NUC2 1H  
 CPDPRG[2] waltz16  
 PCPD2 80.00 usec  
 PLW2 20.00000000 W  
 PLW12 0.39550999 W  
 PLW13 0.25312999 W

F2 - Processing parameters  
 SI 32768  
 SF 125.7577885 MHz  
 WDW EM  
 SSB 0  
 LB 1.00 Hz  
 GB 0  
 PC 1.40

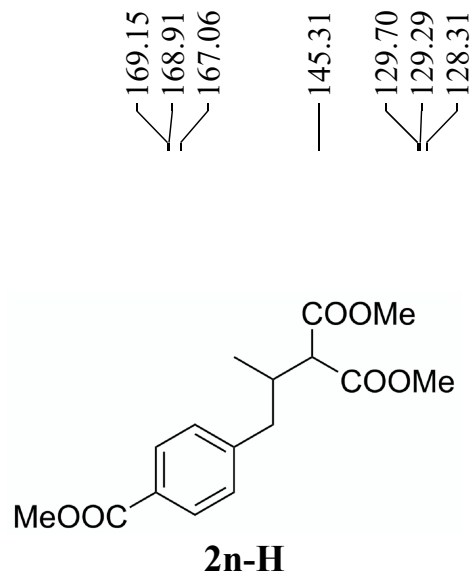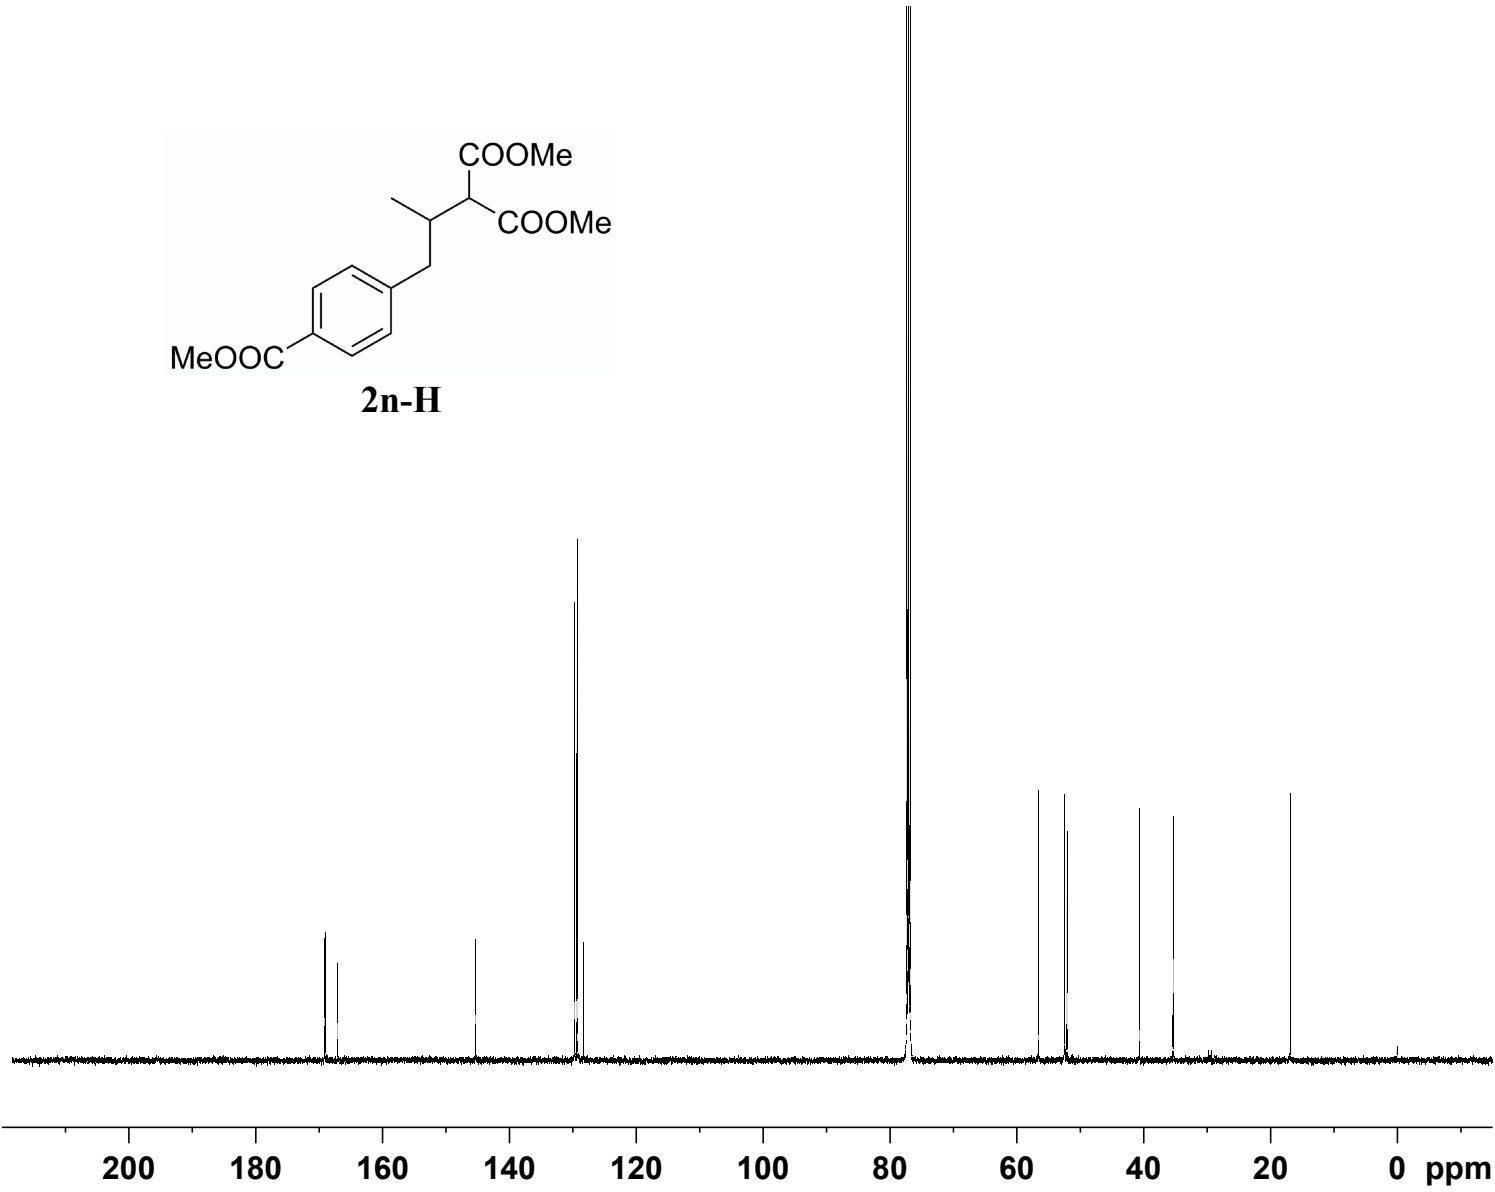

Current Data Parameters  
 NAME 500M-2020xia  
 EXPNO 219  
 PROCNO 1

F2 - Acquisition Parameters  
 Date\_ 20220105  
 Time 17.00  
 INSTRUM spect  
 PROBHD 5 mm CPPBBO BB  
 PULPROG zgpg30  
 TD 65536  
 SOLVENT CDCl3  
 NS 512  
 DS 4  
 SWH 29761.904 Hz  
 FIDRES 0.454131 Hz  
 AQ 1.1010048 sec  
 RG 192.89  
 DW 16.800 usec  
 DE 18.00 usec  
 TE 298.2 K  
 D1 2.00000000 sec  
 D11 0.03000000 sec  
 TD0 1

==== CHANNEL f1 =====  
 SFO1 125.7703637 MHz  
 NUC1 13C  
 P1 10.50 usec  
 PLW1 57.00000000 W

==== CHANNEL f2 =====  
 SFO2 500.1320005 MHz  
 NUC2 1H  
 CPDPRG[2] waltz16  
 PCPD2 80.00 usec  
 PLW2 20.00000000 W  
 PLW12 0.39550999 W  
 PLW13 0.25312999 W

F2 - Processing parameters  
 SI 32768  
 SF 125.7577885 MHz  
 WDW EM  
 SSB 0  
 LB 1.00 Hz  
 GB 0  
 PC 1.40

7.884  
7.867  
7.829  
7.823  
7.818  
7.812  
7.717  
7.711  
7.706  
7.700  
7.242  
7.226  
3.892  
3.716  
3.678  
3.624  
3.610  
3.596  
3.426  
3.414  
2.790  
2.777  
2.644  
2.628  
2.504  
2.491  
2.479  
1.756  
1.743  
1.734  
1.722  
1.708  
1.690  
1.681  
1.670  
1.657  
1.428  
1.420  
1.408  
1.397  
1.387

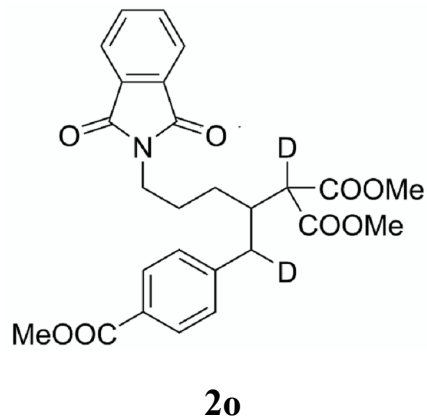

Current Data Parameters  
NAME 500M-2020xia  
EXPNO 229  
PROCNO 1

F2 - Acquisition Parameters  
Date\_ 20220112  
Time 13.30  
INSTRUM spect  
PROBHD 5 mm CPPBBO BB  
PULPROG zg30  
TD 65536  
SOLVENT CDCl3  
NS 16  
DS 2  
SWH 10000.000 Hz  
FIDRES 0.152588 Hz  
AQ 3.2767999 sec  
RG 31.72  
DW 50.000 usec  
DE 6.50 usec  
TE 298.2 K  
D1 1.00000000 sec  
D11 0 sec  
TD0 1

==== CHANNEL f1 =====  
SFO1 500.1330885 MHz  
NUC1 1H  
P1 11.25 usec  
PLW1 20.00000000 W

==== CHANNEL f2 =====  
SFO2 500.1330885 MHz  
NUC2 off  
CPDPRG[2]  
PCPD2 0 usec  
PLW2 0 W  
PLW12 0 W  
PLW13 0 W

F2 - Processing parameters  
SI 65536  
SF 500.1300090 MHz  
WDW EM  
SSB 0  
LB 0.30 Hz  
GB 0  
PC 1.00

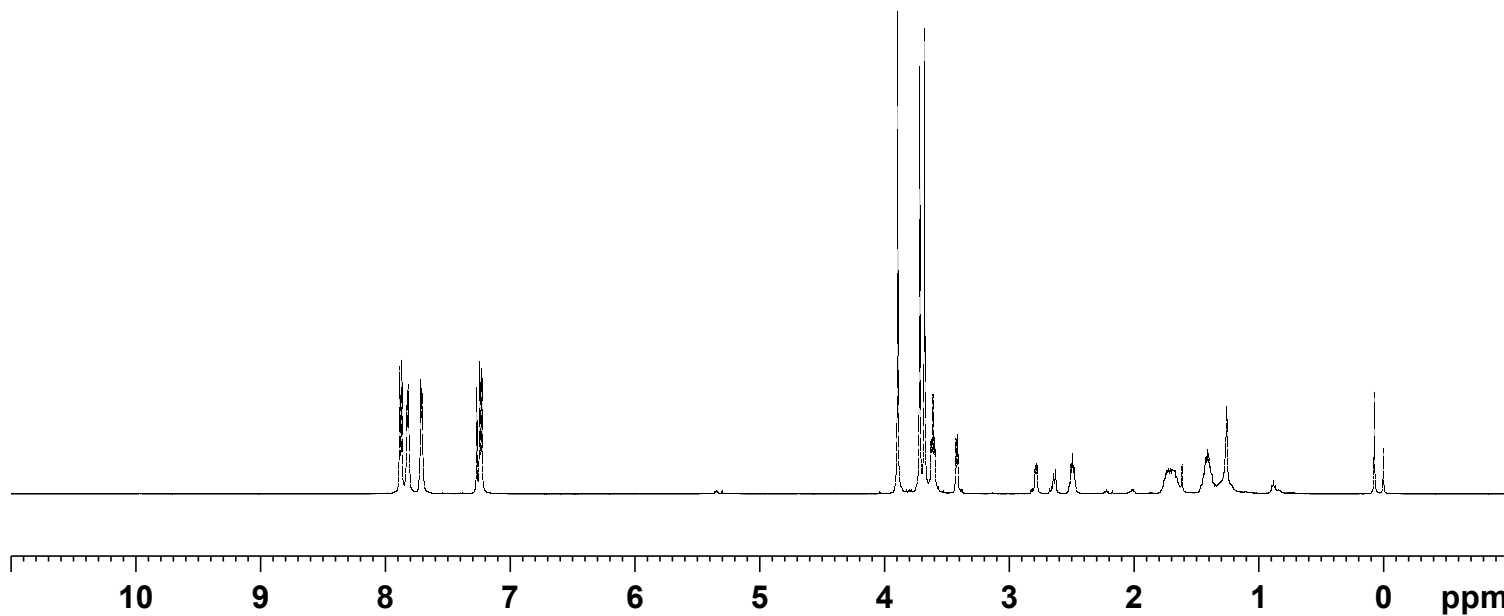

1.96  
2.02  
2.08  
2.00  
3.00  
2.92  
3.00  
2.19  
0.93  
0.63  
0.55  
1.01  
2.29  
2.22

7.883  
7.869  
7.825  
7.821  
7.814  
7.713  
7.709  
7.703  
7.242  
7.227  
3.894  
3.892  
3.718  
3.716  
3.679  
3.677  
3.625  
3.611  
3.597  
3.426  
3.415  
2.810  
2.796  
2.783  
2.675  
2.659  
2.649  
2.632  
2.505  
2.493  
1.723  
1.708  
1.693  
1.681  
1.672  
1.626  
1.432  
1.423  
1.411  
1.400  
1.390

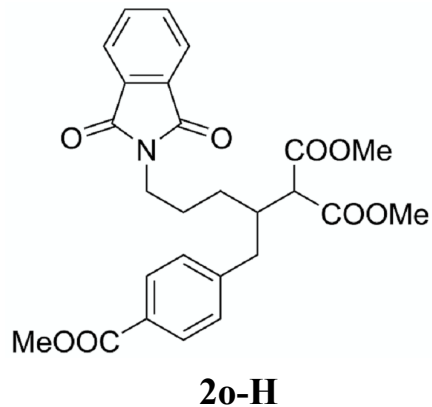

Current Data Parameters  
NAME 500M-2020xia  
EXPNO 216  
PROCNO 1

F2 - Acquisition Parameters  
Date\_ 20211228  
Time 15.56  
INSTRUM spect  
PROBHD 5 mm CPPBBO BB  
PULPROG zg30  
TD 65536  
SOLVENT CDCl3  
NS 16  
DS 2  
SWH 10000.000 Hz  
FIDRES 0.152588 Hz  
AQ 3.2767999 sec  
RG 49.27  
DW 50.000 usec  
DE 6.50 usec  
TE 298.2 K  
D1 1.00000000 sec  
D11 0 sec  
TD0 1

==== CHANNEL f1 =====  
SFO1 500.1330885 MHz  
NUC1 1H  
P1 11.25 usec  
PLW1 20.00000000 W

==== CHANNEL f2 =====  
SFO2 500.1330885 MHz  
NUC2 off  
CPDPRG[2]  
PCPD2 0 usec  
PLW2 0 W  
PLW12 0 W  
PLW13 0 W

F2 - Processing parameters  
SI 65536  
SF 500.1300046 MHz  
WDW EM  
SSB 0  
LB 0.30 Hz  
GB 0  
PC 1.00

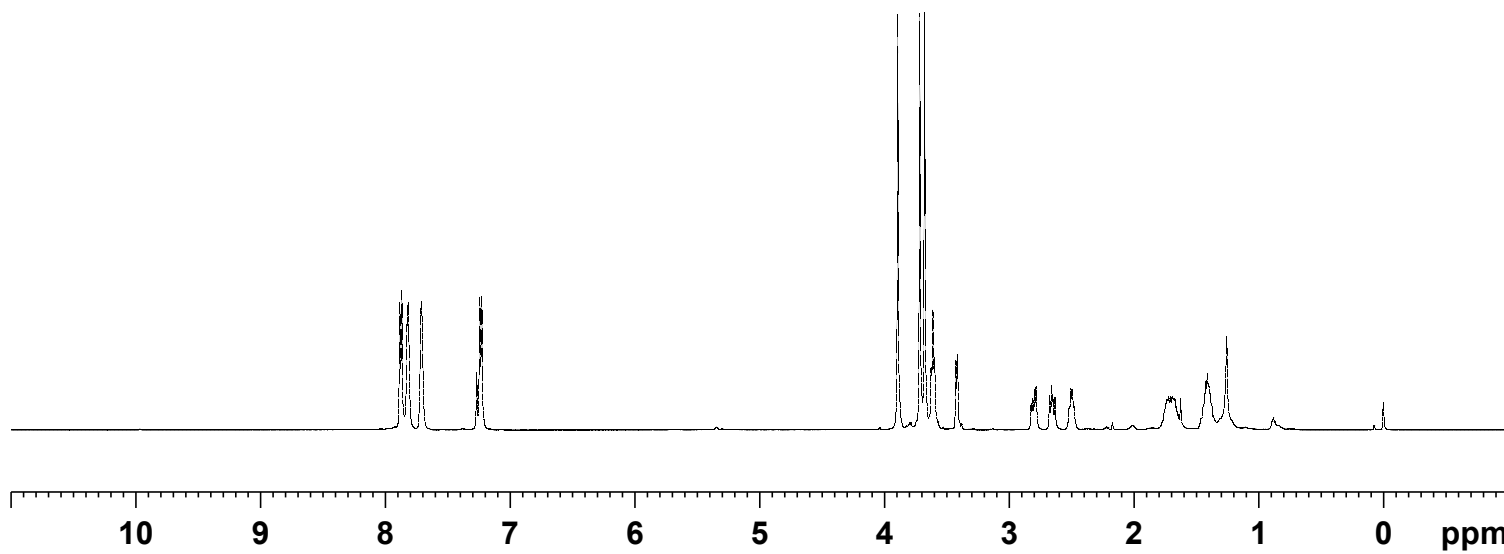

3.96  
2.00  
2.34  
3.03  
5.83  
2.06  
1.04  
0.98  
1.00  
0.99  
2.34  
2.09



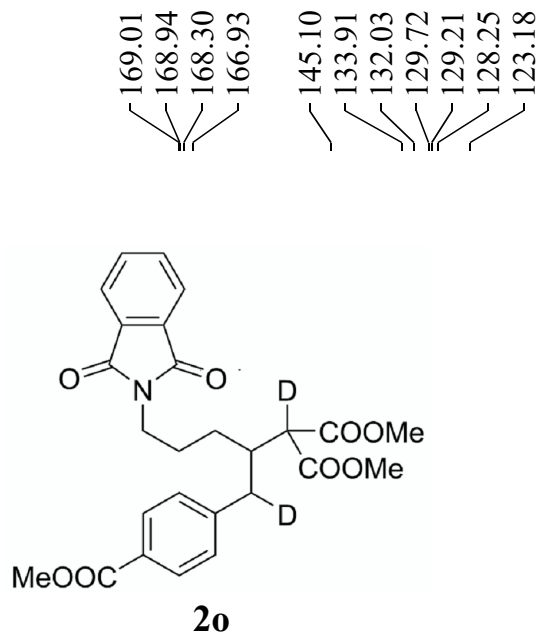

53.80  
52.44  
52.40  
51.98  
39.65  
37.52  
37.15  
37.01  
29.71  
27.75  
25.47

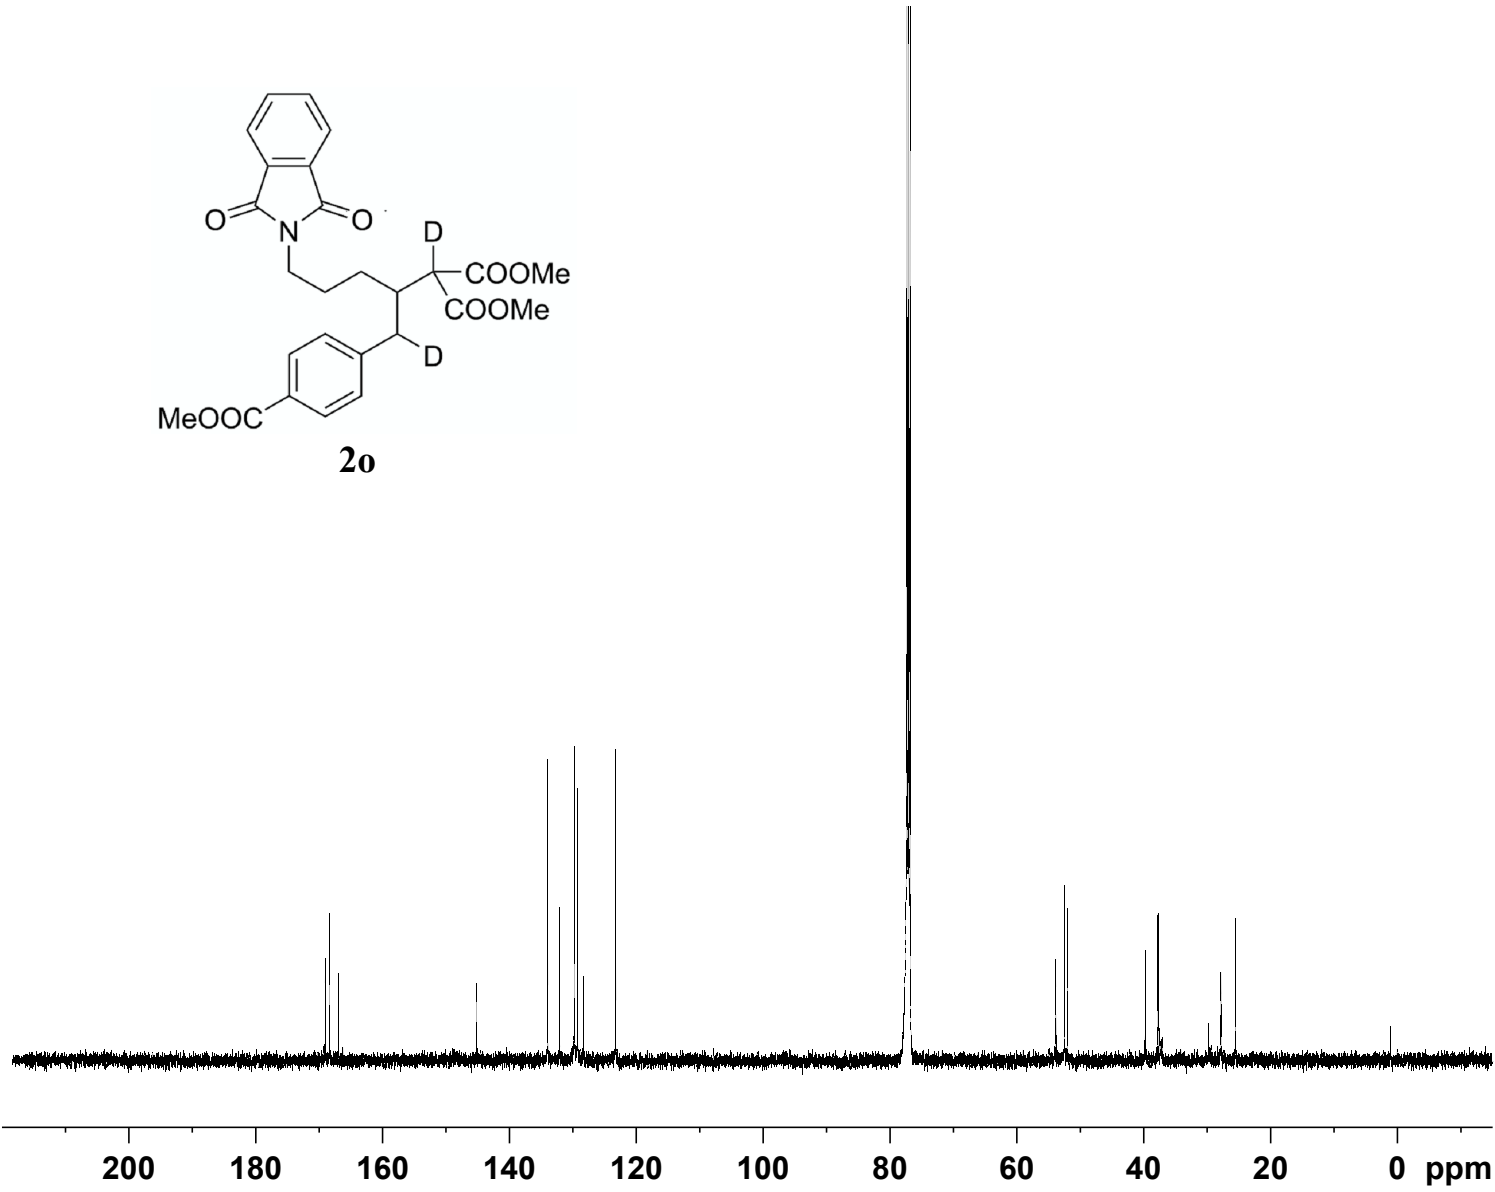

Current Data Parameters  
 NAME 500M-2020xia  
 EXPNO 226  
 PROCNO 1

F2 - Acquisition Parameters  
 Date\_ 20220111  
 Time 12.31  
 INSTRUM spect  
 PROBHD 5 mm CPPBBO BB  
 PULPROG zgpg30  
 TD 65536  
 SOLVENT CDC13  
 NS 512  
 DS 4  
 SWH 29761.904 Hz  
 FIDRES 0.454131 Hz  
 AQ 1.1010048 sec  
 RG 192.89  
 DW 16.800 usec  
 DE 18.00 usec  
 TE 298.2 K  
 D1 2.0000000 sec  
 D11 0.0300000 sec  
 TD0 1

==== CHANNEL f1 =====  
 SFO1 125.7703637 MHz  
 NUC1 13C  
 P1 10.50 usec  
 PLW1 57.0000000 W

==== CHANNEL f2 =====  
 SFO2 500.1320005 MHz  
 NUC2 1H  
 CPDPRG[2] waltz16  
 PCPD2 80.00 usec  
 PLW2 20.0000000 W  
 PLW12 0.39550999 W  
 PLW13 0.25312999 W

F2 - Processing parameters  
 SI 32768  
 SF 125.7577885 MHz  
 WDW EM  
 SSB 0  
 LB 1.00 Hz  
 GB 0  
 PC 1.40

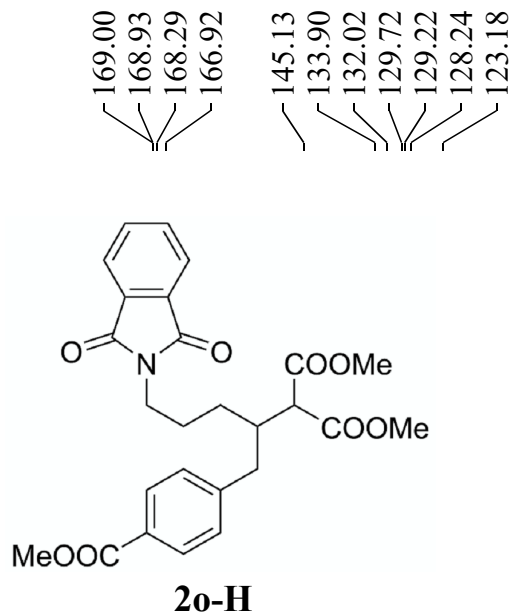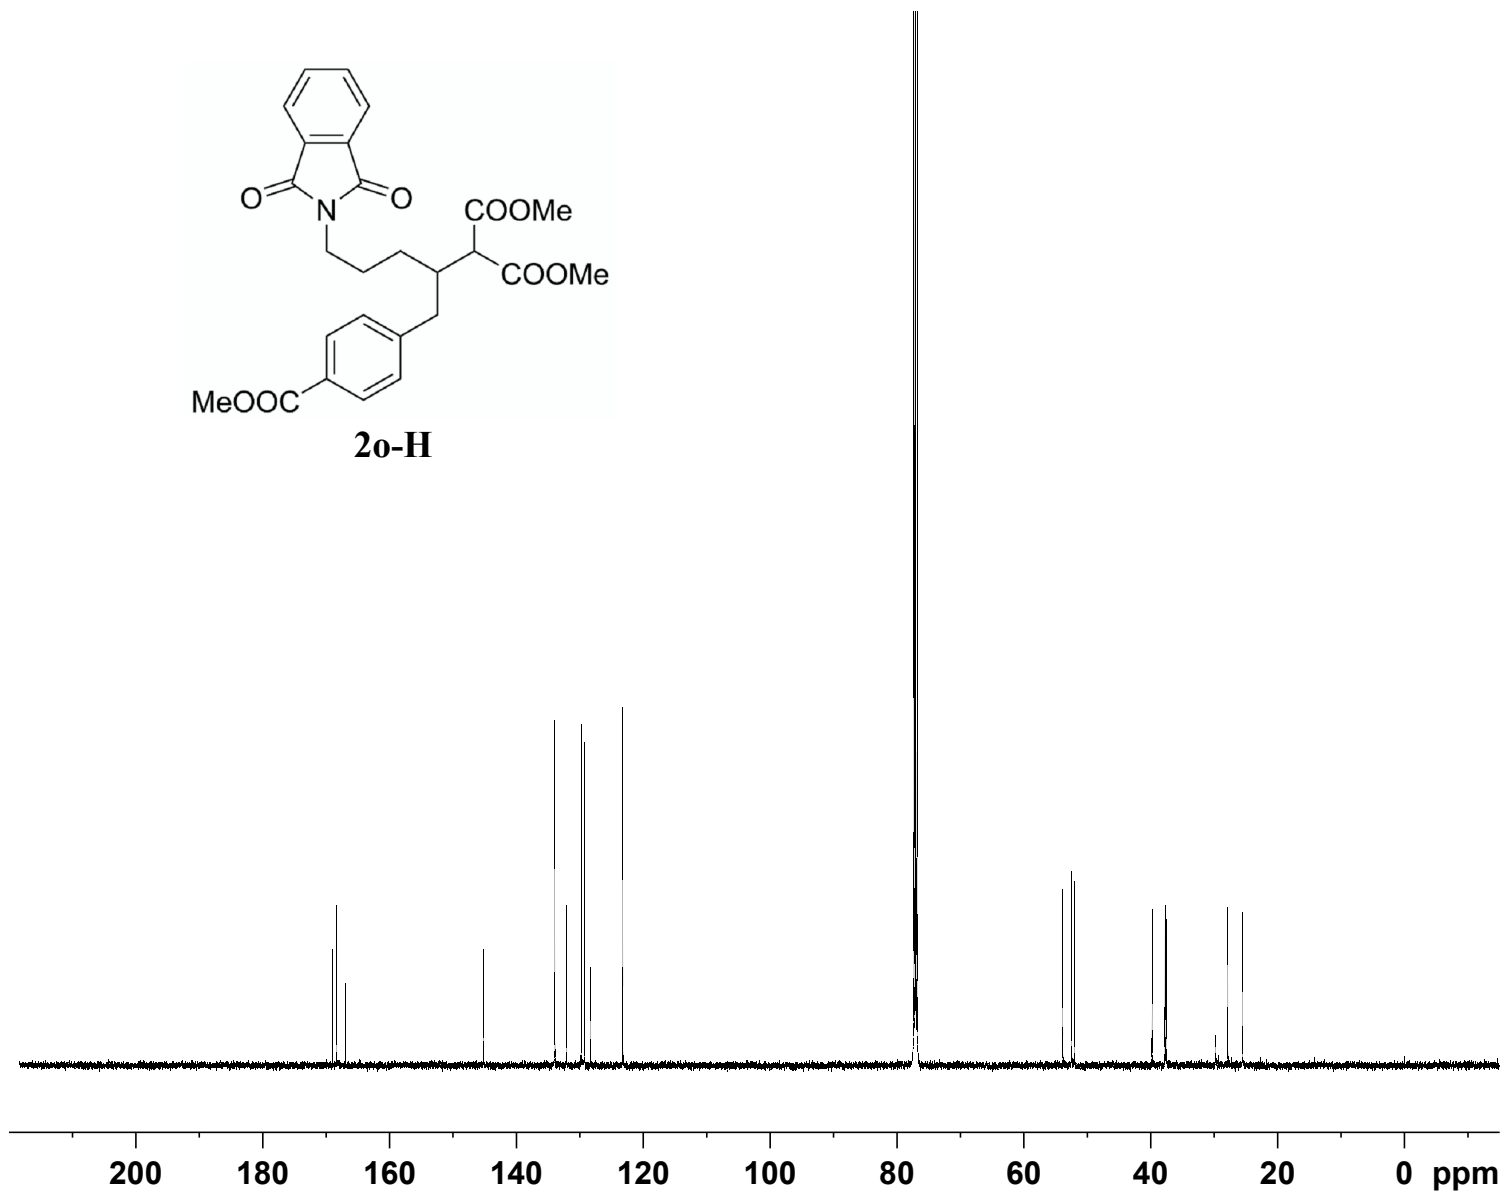

Current Data Parameters  
 NAME 500M-2020xia  
 EXPNO 217  
 PROCNO 1

F2 - Acquisition Parameters  
 Date\_ 20211228  
 Time 16.24  
 INSTRUM spect  
 PROBHD 5 mm CPPBBO BB  
 PULPROG zgpg30  
 TD 65536  
 SOLVENT CDC13  
 NS 512  
 DS 4  
 SWH 29761.904 Hz  
 FIDRES 0.454131 Hz  
 AQ 1.1010048 sec  
 RG 192.89  
 DW 16.800 usec  
 DE 18.00 usec  
 TE 298.2 K  
 D1 2.00000000 sec  
 D11 0.03000000 sec  
 TD0 1

==== CHANNEL f1 =====  
 SFO1 125.7703637 MHz  
 NUC1 13C  
 P1 10.50 usec  
 PLW1 57.00000000 W

==== CHANNEL f2 =====  
 SFO2 500.1320005 MHz  
 NUC2 1H  
 CPDPRG[2] waltz16  
 PCPD2 80.00 usec  
 PLW2 20.00000000 W  
 PLW12 0.39550999 W  
 PLW13 0.25312999 W

F2 - Processing parameters  
 SI 32768  
 SF 125.7577885 MHz  
 WDW EM  
 SSB 0  
 LB 1.00 Hz  
 GB 0  
 PC 1.40

Current Data Parameters  
 NAME 500M-2020xia  
 EXPNO 133  
 PROCNO 1

F2 - Acquisition Parameters  
 Date\_ 20211101  
 Time 10.00  
 INSTRUM spect  
 PROBHD 5 mm CPPBBO BB  
 PULPROG zg30  
 TD 65536  
 SOLVENT CDCl3  
 NS 16  
 DS 2  
 SWH 10000.000 Hz  
 FIDRES 0.152588 Hz  
 AQ 3.2767999 sec  
 RG 31.72  
 DW 50.000 usec  
 DE 6.50 usec  
 TE 298.2 K  
 D1 1.00000000 sec  
 D11 0 sec  
 TD0 1

==== CHANNEL f1 =====  
 SFO1 500.1330885 MHz  
 NUC1 1H  
 P1 10.59 usec  
 PLW1 20.00000000 W

==== CHANNEL f2 =====  
 SFO2 500.1330885 MHz  
 NUC2 off  
 CPDPRG[2]  
 PCPD2 0 usec  
 PLW2 0 W  
 PLW12 0 W  
 PLW13 0 W

F2 - Processing parameters  
 SI 65536  
 SF 500.1300046 MHz  
 WDW EM  
 SSB 0  
 LB 0.30 Hz  
 GB 0  
 PC 1.00

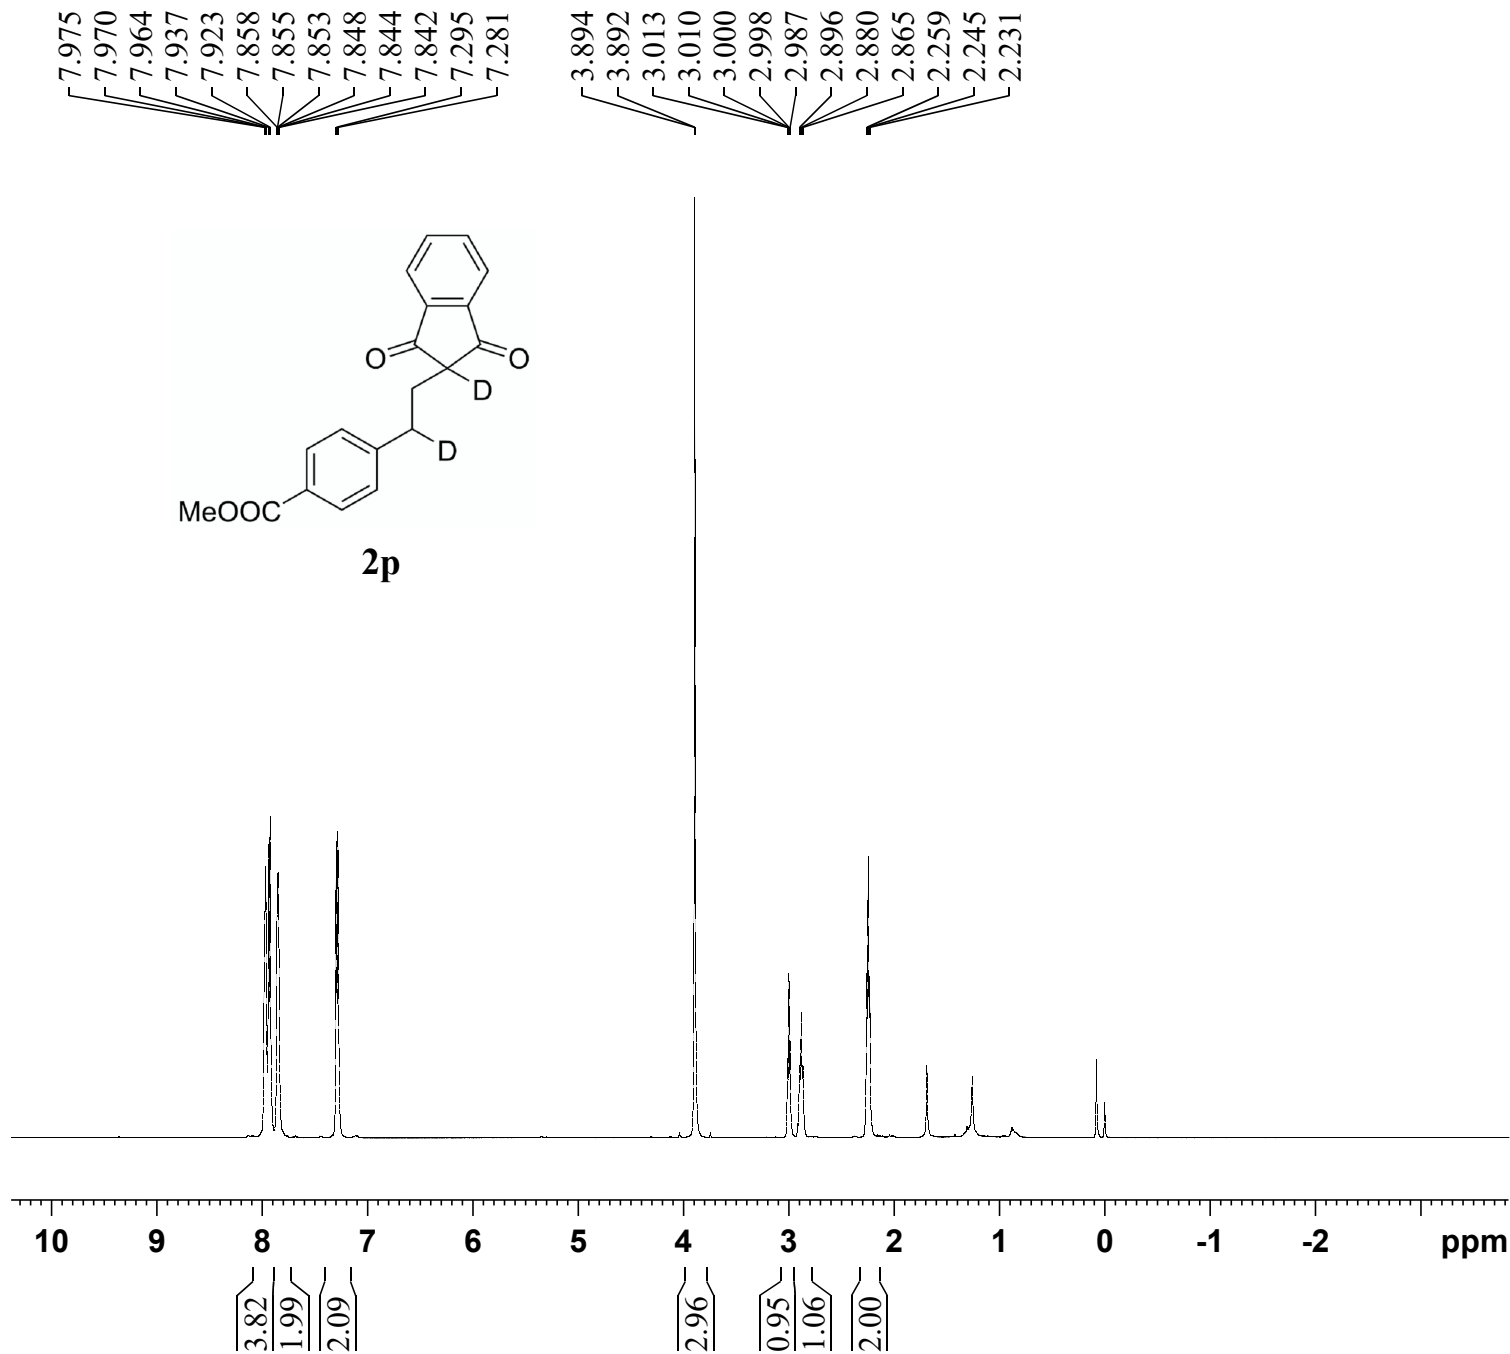

7.975  
7.970  
7.964  
7.939  
7.923  
7.858  
7.856  
7.852  
7.847  
7.841  
7.295  
7.280

3.894  
3.013  
3.000  
2.988  
2.916  
2.900  
2.884  
2.276  
2.261  
2.245  
2.232

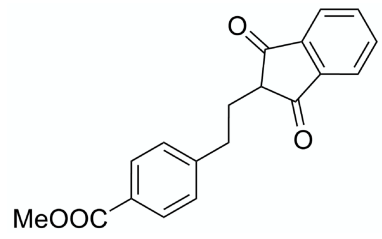

2p-H

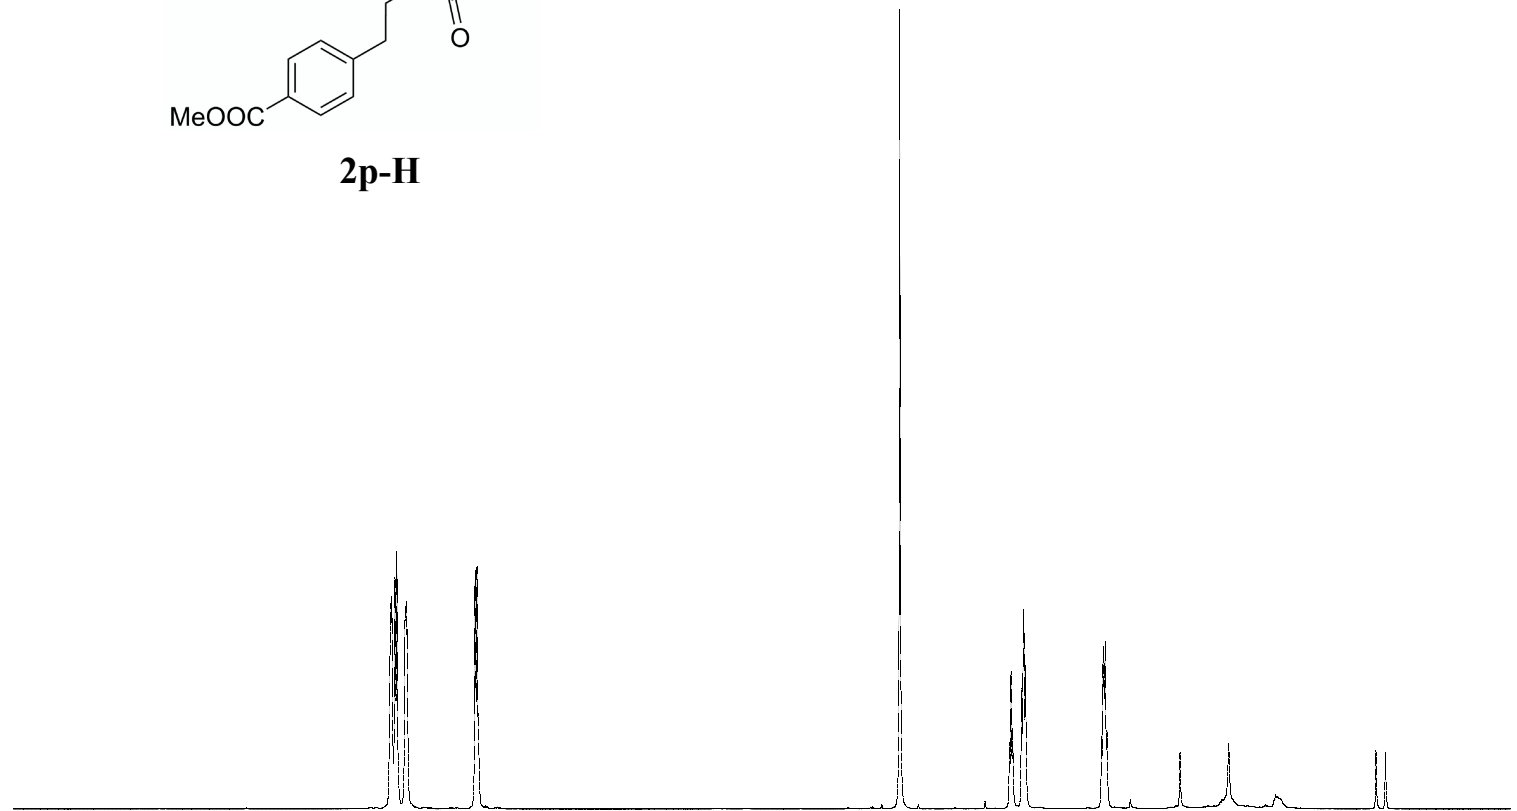

3.90  
2.01  
2.21

3.06  
1.00  
2.01  
2.04

Current Data Parameters  
 NAME 500M-2020xia  
 EXPNO 163  
 PROCNO 1

F2 - Acquisition Parameters  
 Date\_ 20211113  
 Time 15.47  
 INSTRUM spect  
 PROBHD 5 mm CPPBBO BB  
 PULPROG zg30  
 TD 65536  
 SOLVENT CDCl3  
 NS 16  
 DS 2  
 SWH 10000.000 Hz  
 FIDRES 0.152588 Hz  
 AQ 3.2767999 sec  
 RG 49.27  
 DW 50.000 usec  
 DE 6.50 usec  
 TE 298.2 K  
 D1 1.00000000 sec  
 D11 0 sec  
 TD0 1

==== CHANNEL f1 =====  
 SFO1 500.1330885 MHz  
 NUC1 1H  
 P1 10.59 usec  
 PLW1 20.00000000 W

==== CHANNEL f2 =====  
 SFO2 500.1330885 MHz  
 NUC2 off  
 CPDPRG[2]  
 PCPD2 0 usec  
 PLW2 0 W  
 PLW12 0 W  
 PLW13 0 W

F2 - Processing parameters  
 SI 65536  
 SF 500.1300064 MHz  
 WDW EM  
 SSB 0  
 LB 0.30 Hz  
 GB 0  
 PC 1.00

— 199.52

— 166.00

— 145.22

— 141.22

— 134.71

— 128.76

— 127.71

— 127.19

— 122.17

— 51.21

— 50.97

— 31.39

— 31.20

— 31.05

— 30.89

— 27.30

— 27.23

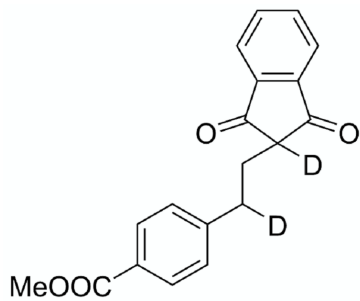

2p

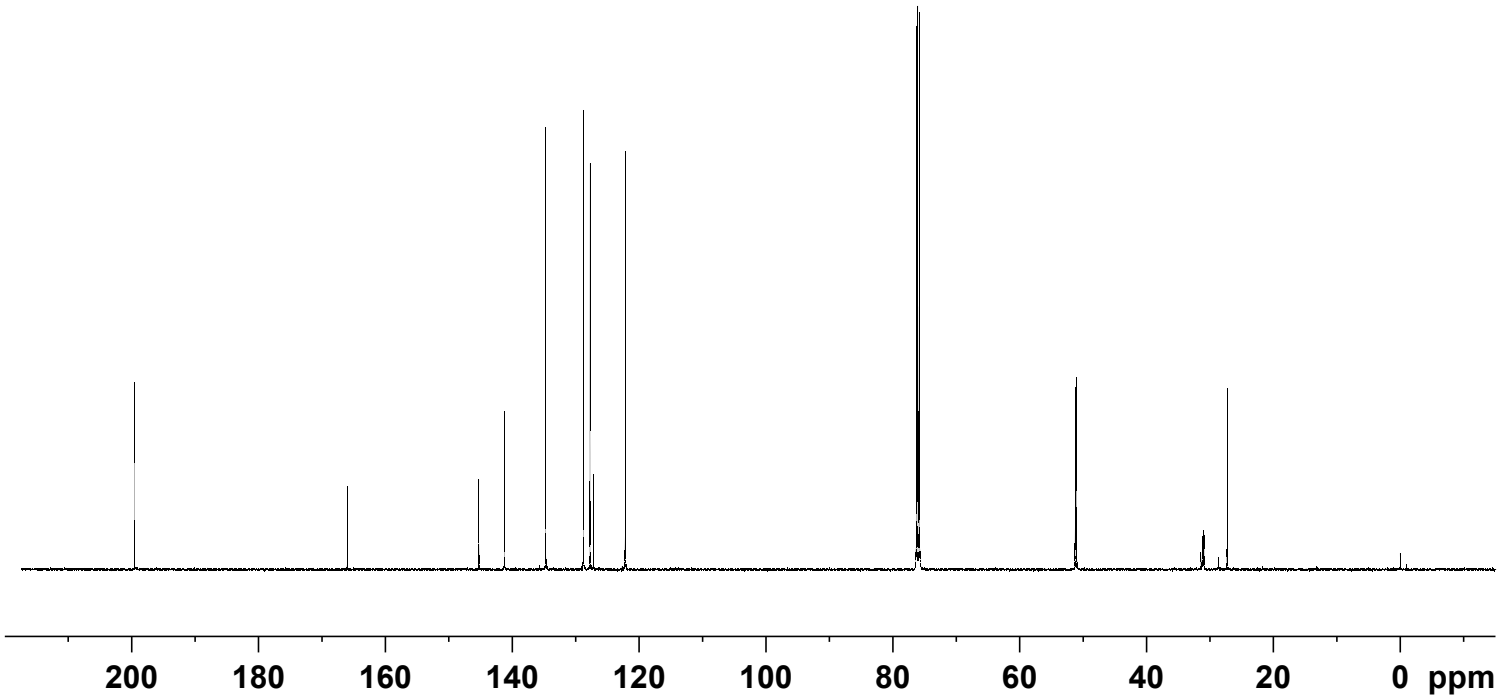

Current Data Parameters  
 NAME 500M-2020xia  
 EXPNO 136  
 PROCNO 1

F2 - Acquisition Parameters  
 Date\_ 20211102  
 Time 10.24  
 INSTRUM spect  
 PROBHD 5 mm CPPBBO BB  
 PULPROG zgpg30  
 TD 65536  
 SOLVENT CDCl3  
 NS 512  
 DS 4  
 SWH 29761.904 Hz  
 FIDRES 0.454131 Hz  
 AQ 1.1010048 sec  
 RG 192.89  
 DW 16.800 usec  
 DE 18.00 usec  
 TE 298.2 K  
 D1 2.00000000 sec  
 D11 0.03000000 sec  
 TD0 1

==== CHANNEL f1 =====  
 SFO1 125.7703637 MHz  
 NUC1 13C  
 P1 9.80 usec  
 PLW1 57.00000000 W

==== CHANNEL f2 =====  
 SFO2 500.1320005 MHz  
 NUC2 1H  
 CPDPRG[2] waltz16  
 PCPD2 80.00 usec  
 PLW2 20.00000000 W  
 PLW12 0.35778001 W  
 PLW13 0.22898000 W

F2 - Processing parameters  
 SI 32768  
 SF 125.7579178 MHz  
 WDW EM  
 SSB 0  
 LB 1.00 Hz  
 GB 0  
 PC 1.40

— 199.51  
 — 166.00  
 / 145.26  
 / 141.23  
 / 134.71  
 / 128.76  
 / 127.71  
 / 127.19  
 / 122.17

< 51.24  
 < 50.97  
 < 31.39  
 < 27.31

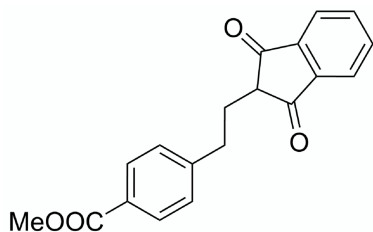

**2p-H**

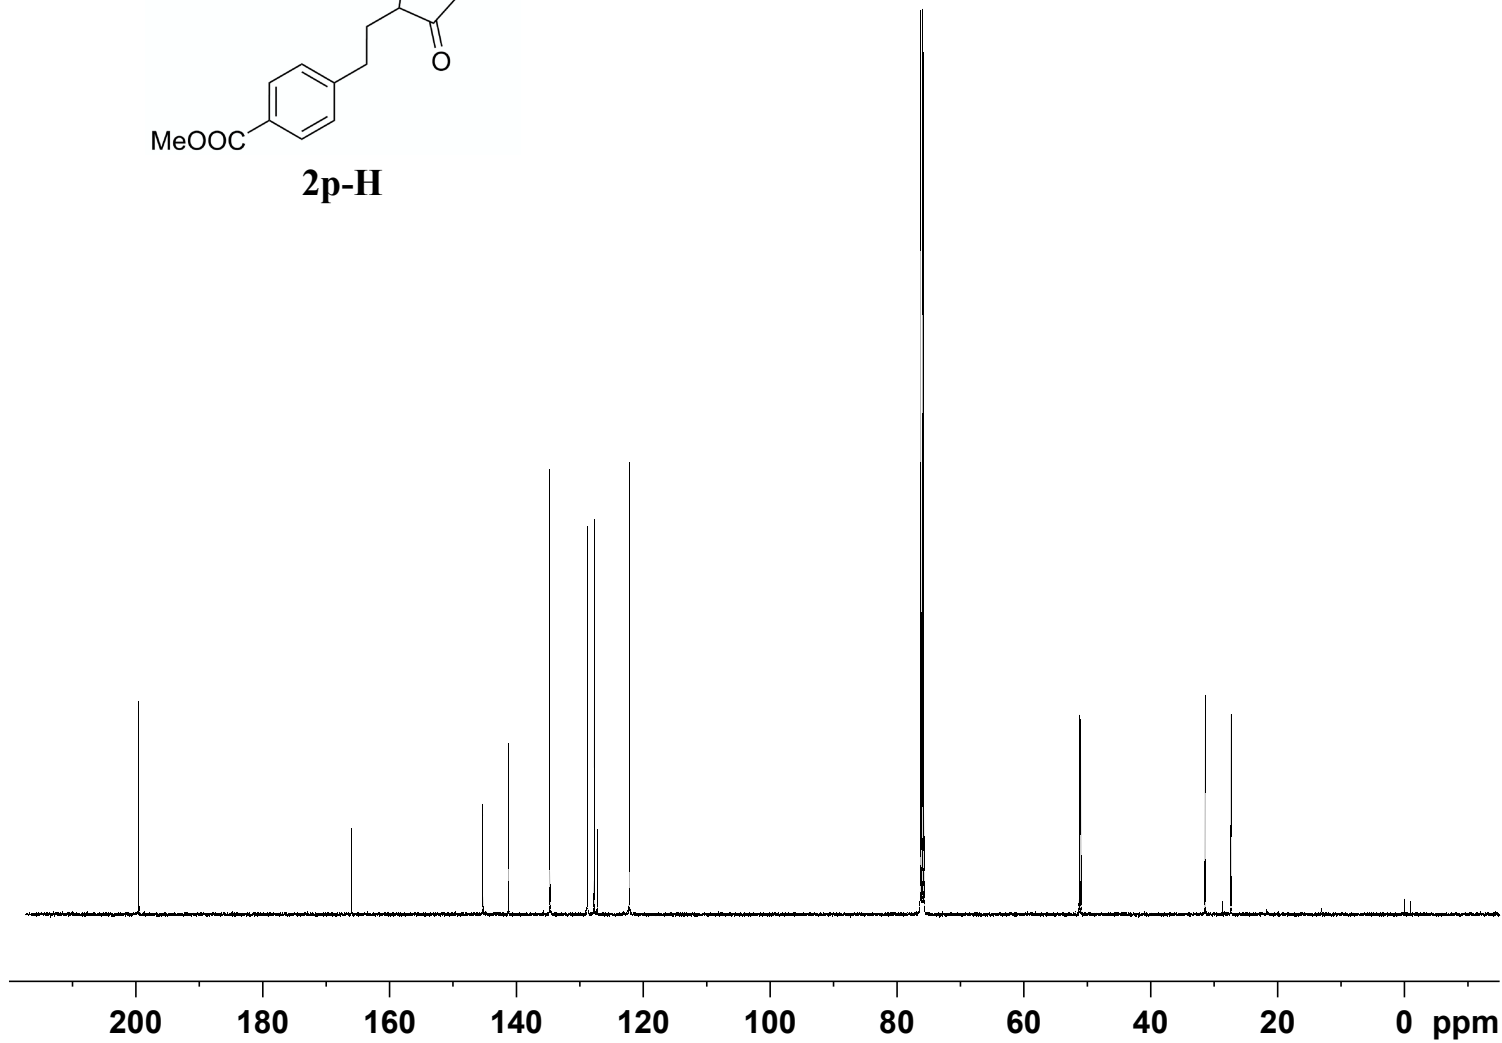

Current Data Parameters  
 NAME 500M-2020xia  
 EXPNO 164  
 PROCNO 1

F2 - Acquisition Parameters  
 Date\_ 20211113  
 Time 16.14  
 INSTRUM spect  
 PROBHD 5 mm CPPBBO BB  
 PULPROG zgpg30  
 TD 65536  
 SOLVENT CDCl3  
 NS 512  
 DS 4  
 SWH 29761.904 Hz  
 FIDRES 0.454131 Hz  
 AQ 1.1010048 sec  
 RG 192.89  
 DW 16.800 usec  
 DE 18.00 usec  
 TE 298.2 K  
 D1 2.00000000 sec  
 D11 0.03000000 sec  
 TD0 1

==== CHANNEL f1 =====  
 SFO1 125.7703637 MHz  
 NUC1 13C  
 P1 9.80 usec  
 PLW1 57.00000000 W

==== CHANNEL f2 =====  
 SFO2 500.1320005 MHz  
 NUC2 1H  
 CPDPRG[2] waltz16  
 PCPD2 80.00 usec  
 PLW2 20.00000000 W  
 PLW12 0.35778001 W  
 PLW13 0.22898000 W

F2 - Processing parameters  
 SI 32768  
 SF 125.7579178 MHz  
 WDW EM  
 SSB 0  
 LB 1.00 Hz  
 GB 0  
 PC 1.40

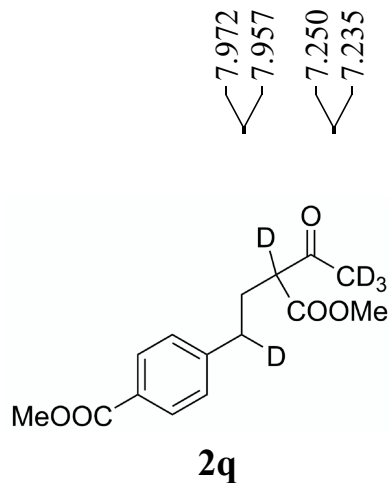

$\begin{matrix} \text{3.904} \\ \text{3.743} \\ \text{3.714} \\ \text{3.443} \\ \text{3.429} \\ \text{3.415} \\ \text{2.672} \\ \text{2.655} \\ \text{2.637} \\ \text{2.622} \\ \text{2.215} \\ \text{2.200} \\ \text{2.186} \\ \text{2.172} \\ \text{2.158} \end{matrix}$

Current Data Parameters  
 NAME 500M-2020xia  
 EXPNO 157  
 PROCNO 1

F2 - Acquisition Parameters  
 Date\_ 20211113  
 Time 7.02  
 INSTRUM spect  
 PROBHD 5 mm CPPBBO BB  
 PULPROG zg30  
 TD 65536  
 SOLVENT CDCl3  
 NS 16  
 DS 2  
 SWH 10000.000 Hz  
 FIDRES 0.152588 Hz  
 AQ 3.2767999 sec  
 RG 31.72  
 DW 50.000 usec  
 DE 6.50 usec  
 TE 298.2 K  
 D1 1.00000000 sec  
 D11 0 sec  
 TD0 1

==== CHANNEL f1 =====  
 SFO1 500.1330885 MHz  
 NUC1 1H  
 P1 10.59 usec  
 PLW1 20.00000000 W

==== CHANNEL f2 =====  
 SFO2 500.1330885 MHz  
 NUC2 off  
 CPDPRG[2]  
 PCPD2 0 usec  
 PLW2 0 W  
 PLW12 0 W  
 PLW13 0 W

F2 - Processing parameters  
 SI 65536  
 SF 500.1300012 MHz  
 WDW EM  
 SSB 0  
 LB 0.30 Hz  
 GB 0  
 PC 1.00

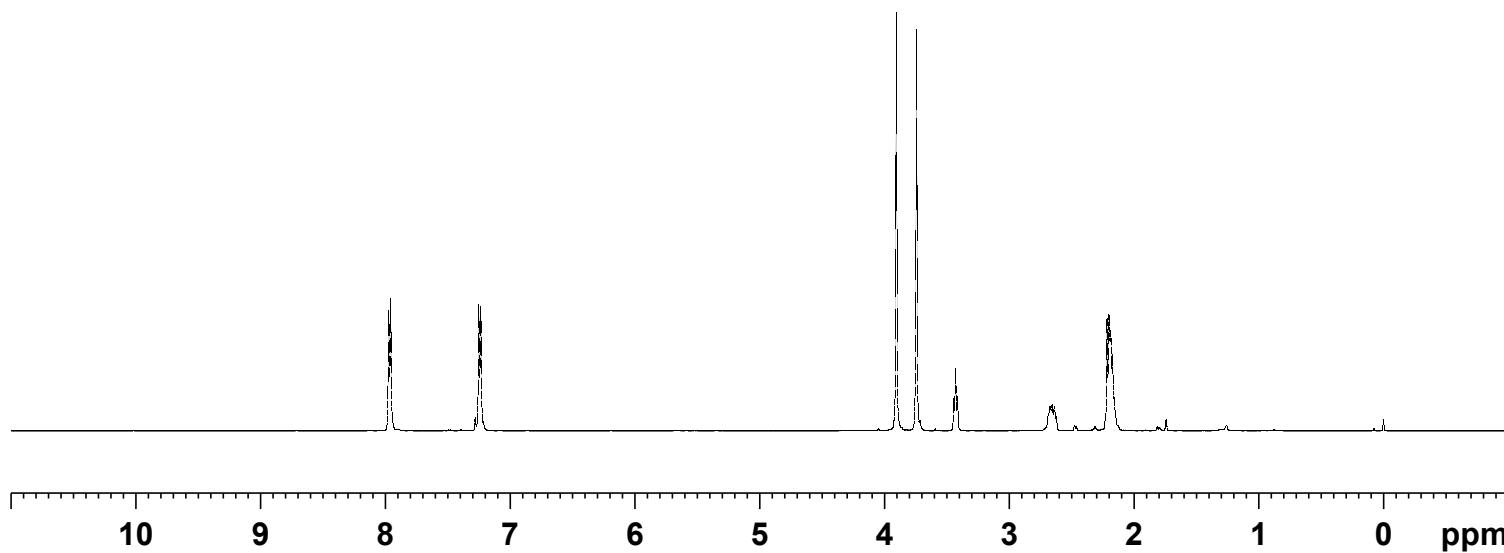

$\begin{matrix} \text{2.00} \\ \text{2.09} \\ \text{3.12} \\ \text{3.00} \\ \text{0.92} \\ \text{1.07} \\ \text{3.71} \end{matrix}$

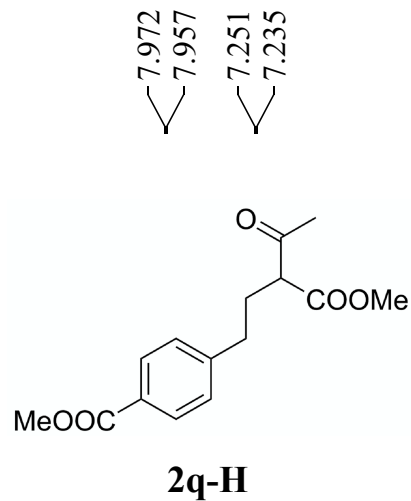

3.904  
 3.742  
 3.446  
 3.431  
 3.417  
 2.707  
 2.695  
 2.679  
 2.664  
 2.649  
 2.638  
 2.216  
 2.186  
 2.172  
 2.158

Current Data Parameters  
 NAME 500M-2020xia  
 EXPNO 153  
 PROCNO 1

F2 - Acquisition Parameters  
 Date\_ 20211113  
 Time 5.32  
 INSTRUM spect  
 PROBHD 5 mm CPPBBO BB  
 PULPROG zg30  
 TD 65536  
 SOLVENT CDCl3  
 NS 16  
 DS 2  
 SWH 10000.000 Hz  
 FIDRES 0.152588 Hz  
 AQ 3.2767999 sec  
 RG 31.72  
 DW 50.000 usec  
 DE 6.50 usec  
 TE 298.2 K  
 D1 1.00000000 sec  
 D11 0 sec  
 TD0 1

===== CHANNEL f1 =====  
 SFO1 500.1330885 MHz  
 NUC1 1H  
 P1 10.59 usec  
 PLW1 20.00000000 W

===== CHANNEL f2 =====  
 SFO2 500.1330885 MHz  
 NUC2 off  
 CPDPRG[2]  
 PCPD2 0 usec  
 PLW2 0 W  
 PLW12 0 W  
 PLW13 0 W

F2 - Processing parameters  
 SI 65536  
 SF 500.1300010 MHz  
 WDW EM  
 SSB 0  
 LB 0.30 Hz  
 GB 0  
 PC 1.00

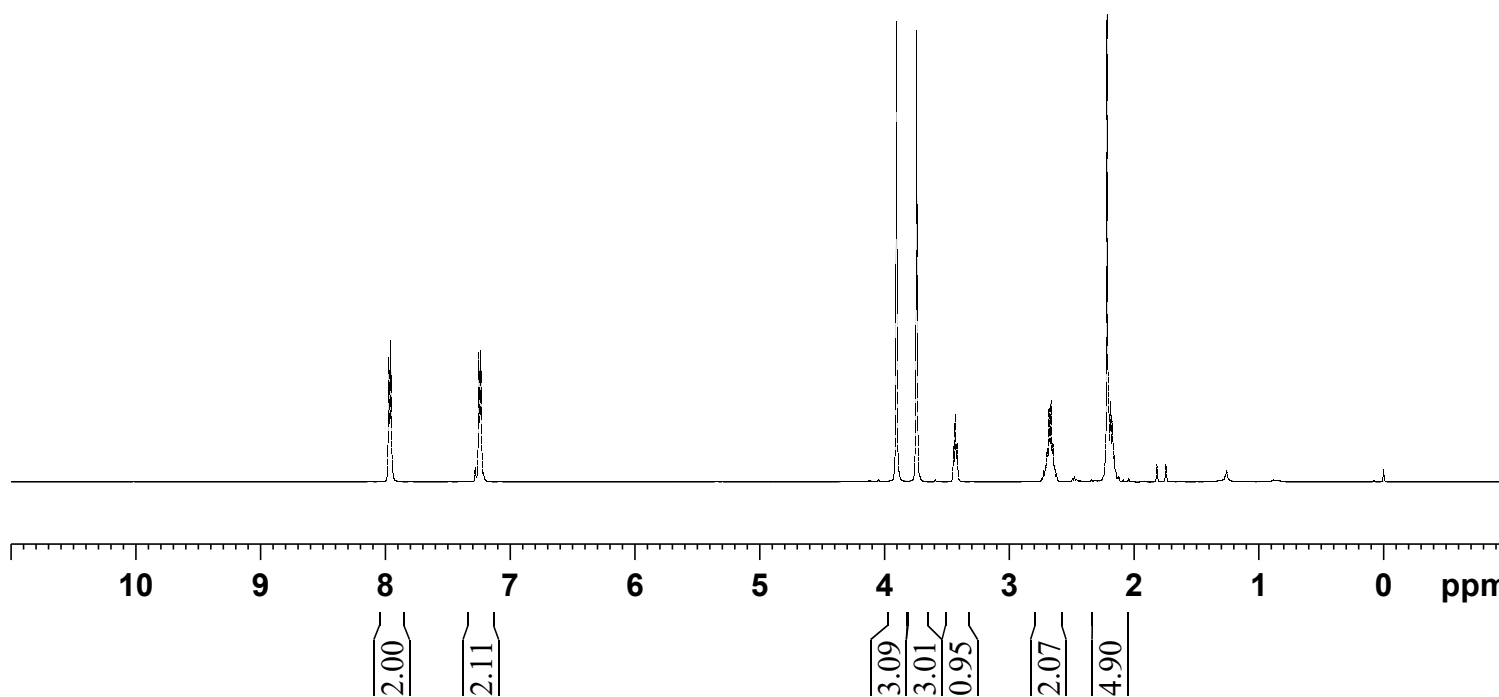



202.58  
202.54  
202.49

169.95  
166.97

146.04  
129.86  
129.64  
128.51  
128.30

58.54  
52.50  
52.02  
33.12  
32.96  
32.81  
29.07  
29.03  
28.93  
28.78  
28.62

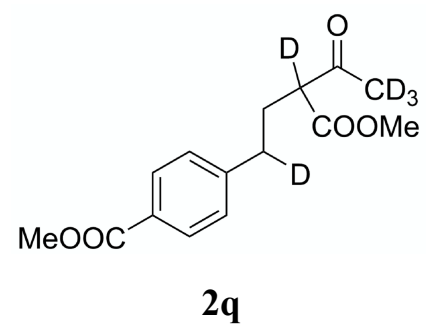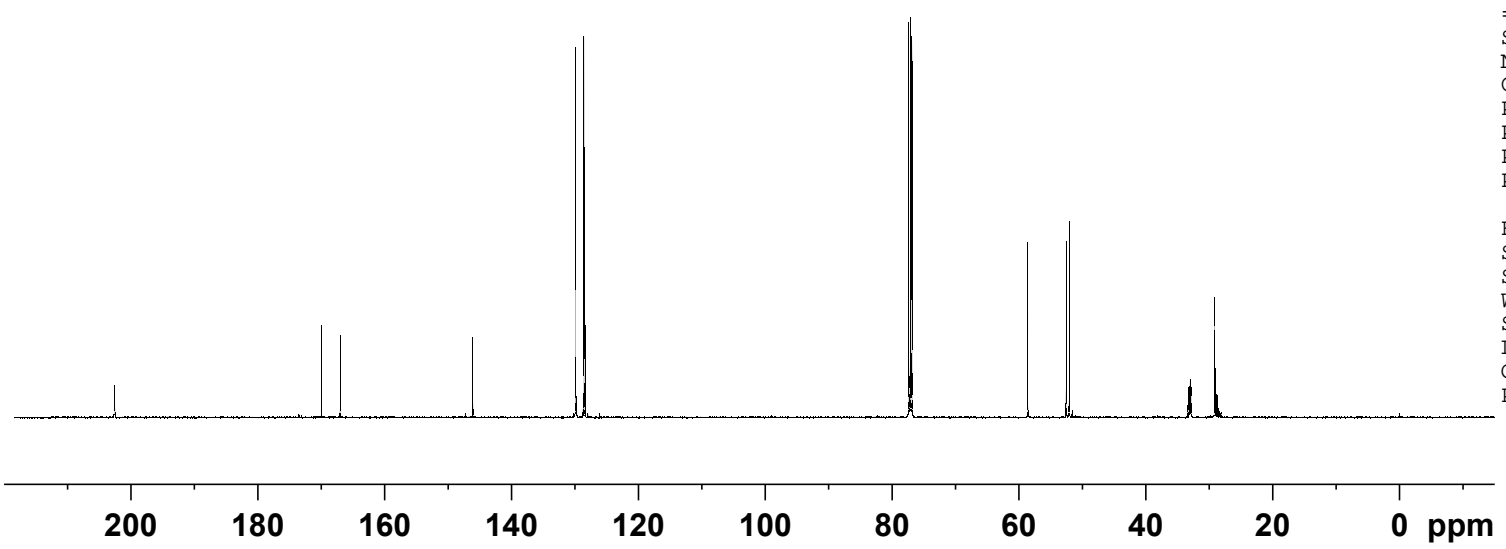

Current Data Parameters  
NAME 500M-2020xia  
EXPNO 158  
PROCNO 1

F2 - Acquisition Parameters  
Date\_ 20211113  
Time 7.29  
INSTRUM spect  
PROBHD 5 mm CPPBBO BB  
PULPROG zgpg30  
TD 65536  
SOLVENT CDCl3  
NS 512  
DS 4  
SWH 29761.904 Hz  
FIDRES 0.454131 Hz  
AQ 1.1010048 sec  
RG 192.89  
DW 16.800 usec  
DE 18.00 usec  
TE 298.2 K  
D1 2.00000000 sec  
D11 0.03000000 sec  
TD0 1

==== CHANNEL f1 =====  
SFO1 125.7703637 MHz  
NUC1 13C  
P1 9.80 usec  
PLW1 57.00000000 W

==== CHANNEL f2 =====  
SFO2 500.1320005 MHz  
NUC2 1H  
CPDPRG[2] waltz16  
PCPD2 80.00 usec  
PLW2 20.00000000 W  
PLW12 0.35778001 W  
PLW13 0.22898000 W

F2 - Processing parameters  
SI 32768  
SF 125.7577885 MHz  
WDW EM  
SSB 0  
LB 1.00 Hz  
GB 0  
PC 1.40

— 202.48

— 169.95  
— 166.97

— 146.08

— 129.86  
— 128.51  
— 128.30

— 58.56  
— 52.50  
— 52.02

— 33.31  
— 29.15  
— 29.03

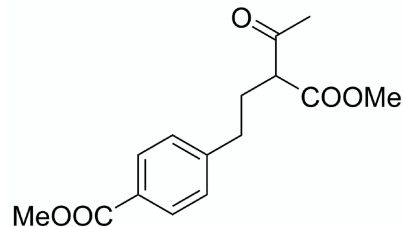

**2q-H**

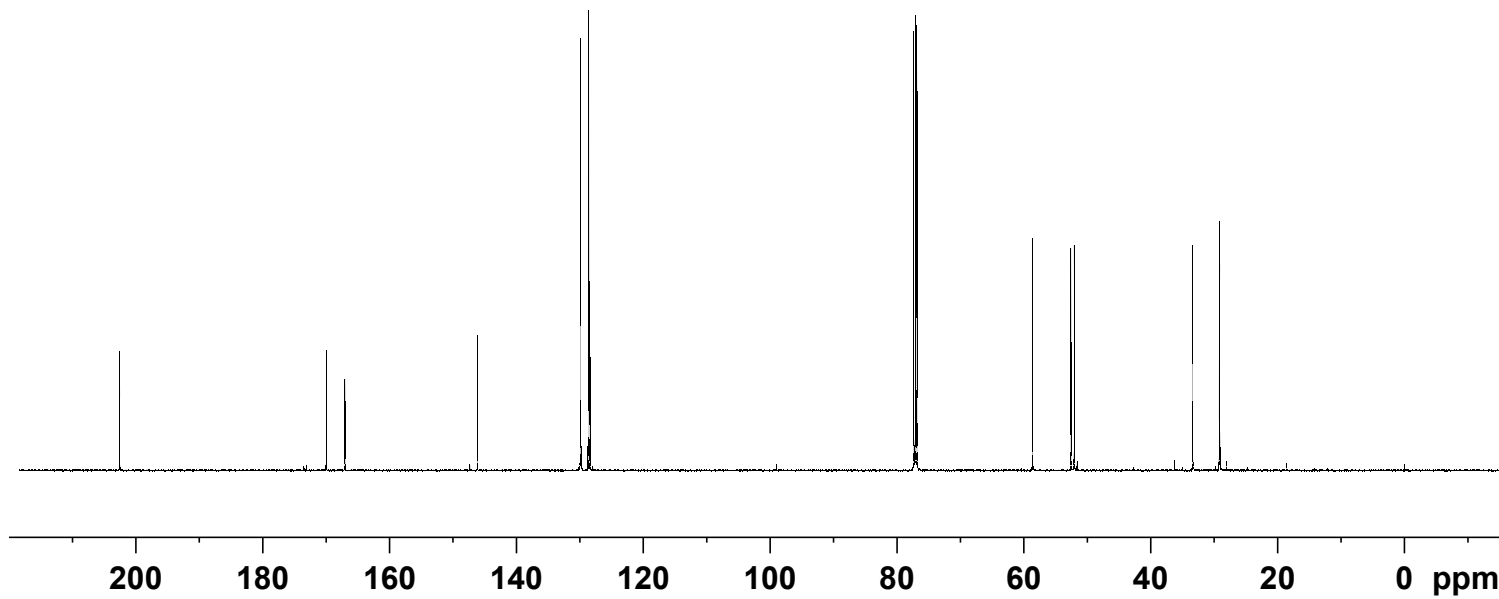

Current Data Parameters  
 NAME 500M-2020xia  
 EXPNO 154  
 PROCNO 1

F2 - Acquisition Parameters  
 Date\_ 20211113  
 Time 5.59  
 INSTRUM spect  
 PROBHD 5 mm CPPBBO BB  
 PULPROG zgpg30  
 TD 65536  
 SOLVENT CDCl3  
 NS 512  
 DS 4  
 SWH 29761.904 Hz  
 FIDRES 0.454131 Hz  
 AQ 1.1010048 sec  
 RG 192.89  
 DW 16.800 usec  
 DE 18.00 usec  
 TE 298.2 K  
 D1 2.00000000 sec  
 D11 0.03000000 sec  
 TD0 1

==== CHANNEL f1 =====  
 SFO1 125.7703637 MHz  
 NUC1 13C  
 P1 9.80 usec  
 PLW1 57.00000000 W

==== CHANNEL f2 =====  
 SFO2 500.1320005 MHz  
 NUC2 1H  
 CPDPRG[2] waltz16  
 PCPD2 80.00 usec  
 PLW2 20.00000000 W  
 PLW12 0.35778001 W  
 PLW13 0.22898000 W

F2 - Processing parameters  
 SI 32768  
 SF 125.7577885 MHz  
 WDW EM  
 SSB 0  
 LB 1.00 Hz  
 GB 0  
 PC 1.40

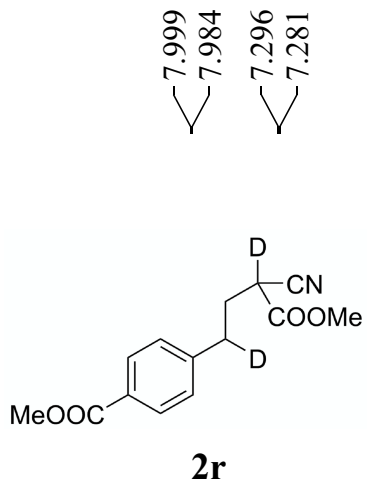

$\begin{matrix} \text{3.912} \\ \text{3.799} \\ \text{3.483} \\ \text{3.469} \\ \text{3.455} \\ \text{2.939} \\ \text{2.926} \\ \text{2.880} \\ \text{2.866} \\ \text{2.852} \\ \text{2.836} \\ \text{2.300} \\ \text{2.285} \\ \text{2.271} \end{matrix}$

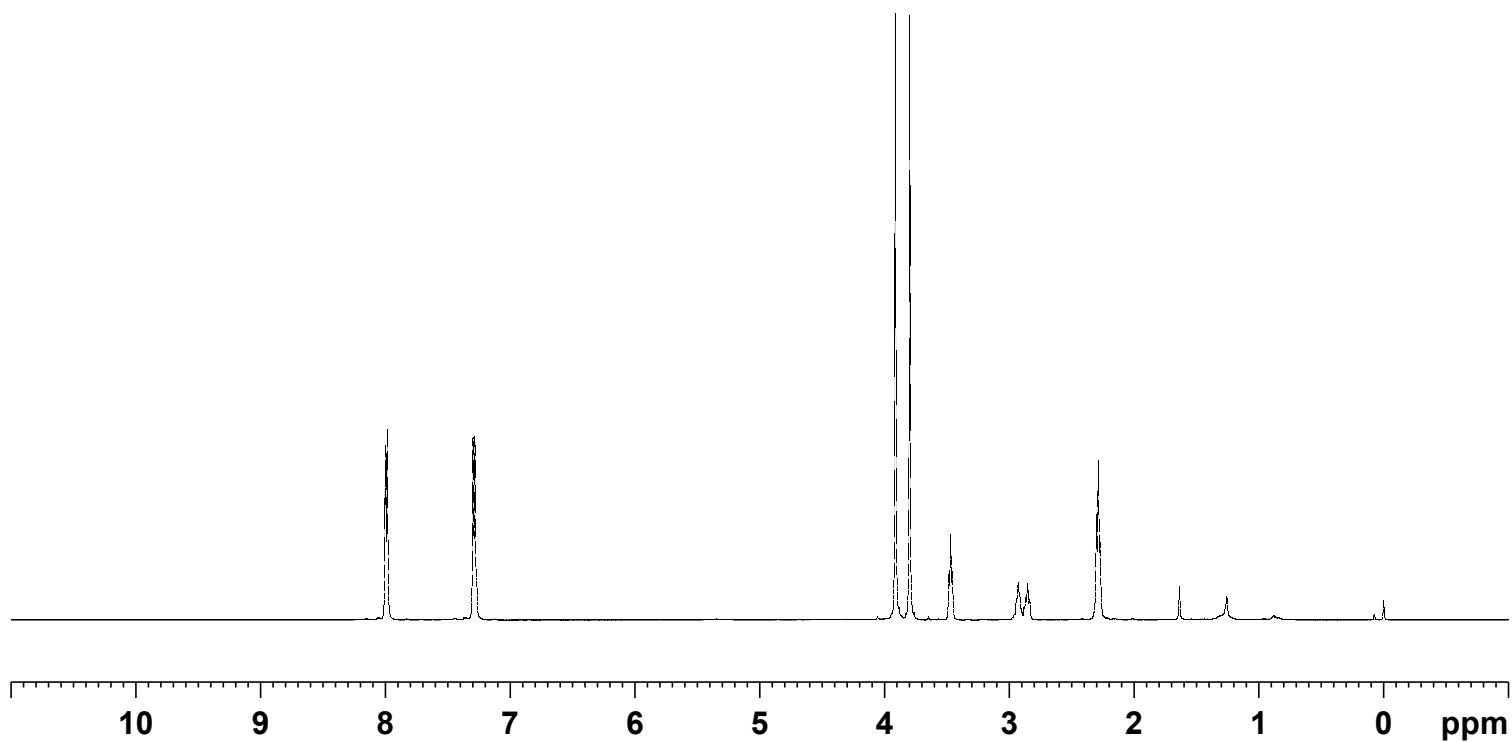

Current Data Parameters  
 NAME 500M-2020xia  
 EXPNO 161  
 PROCNO 1

F2 - Acquisition Parameters  
 Date\_ 20211113  
 Time 8.04  
 INSTRUM spect  
 PROBHD 5 mm CPPBBO BB  
 PULPROG zg30  
 TD 65536  
 SOLVENT CDCl3  
 NS 16  
 DS 2  
 SWH 10000.000 Hz  
 FIDRES 0.152588 Hz  
 AQ 3.2767999 sec  
 RG 49.27  
 DW 50.000 usec  
 DE 6.50 usec  
 TE 298.2 K  
 D1 1.00000000 sec  
 D11 0 sec  
 TD0 1

==== CHANNEL f1 =====  
 SFO1 500.1330885 MHz  
 NUC1 1H  
 P1 10.59 usec  
 PLW1 20.00000000 W

==== CHANNEL f2 =====  
 SFO2 500.1330885 MHz  
 NUC2 off  
 CPDPRG[2]  
 PCPD2 0 usec  
 PLW2 0 W  
 PLW12 0 W  
 PLW13 0 W

F2 - Processing parameters  
 SI 65536  
 SF 500.1300065 MHz  
 WDW EM  
 SSB 0  
 LB 0.30 Hz  
 GB 0  
 PC 1.00

2.00  
2.18

3.17  
3.01  
0.98  
1.16  
2.08

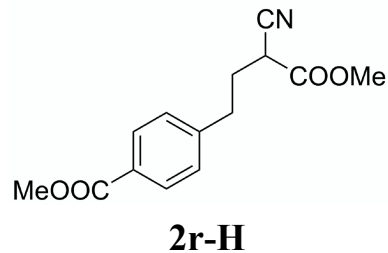

7.998  
7.983  
7.297  
7.282

3.912  
3.798  
3.488  
3.474  
3.460  
2.958  
2.944  
2.930  
2.916  
2.896  
2.880  
2.865  
2.852  
2.315  
2.299  
2.285  
2.270

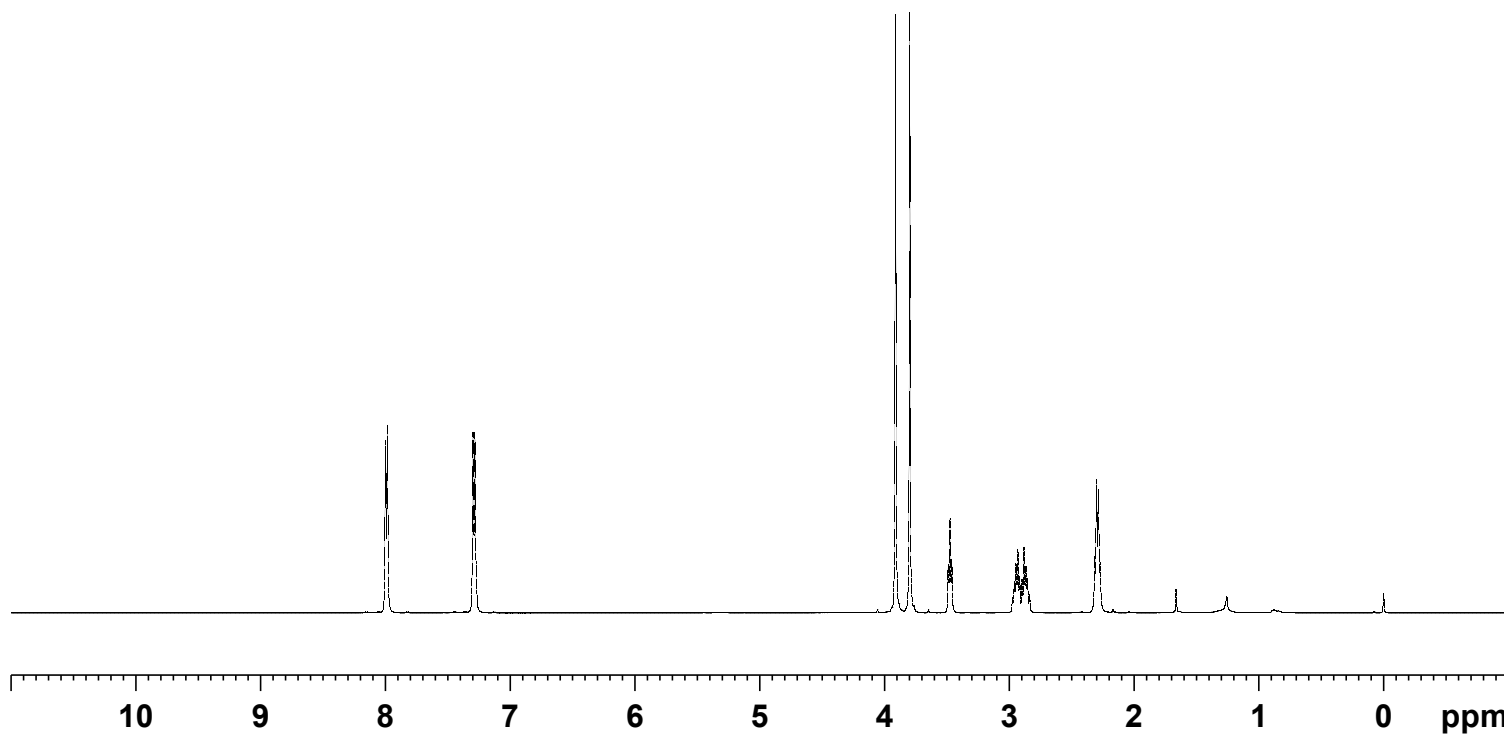

2.00  
2.14

3.11  
3.03  
0.99  
2.05  
2.06

Current Data Parameters  
 NAME 500M-2020xia  
 EXPNO 159  
 PROCNO 1

F2 - Acquisition Parameters  
 Date\_ 20211113  
 Time 7.33  
 INSTRUM spect  
 PROBHD 5 mm CPPBBO BB  
 PULPROG zg30  
 TD 65536  
 SOLVENT CDCl3  
 NS 16  
 DS 2  
 SWH 10000.000 Hz  
 FIDRES 0.152588 Hz  
 AQ 3.2767999 sec  
 RG 31.72  
 DW 50.000 usec  
 DE 6.50 usec  
 TE 298.2 K  
 D1 1.00000000 sec  
 D11 0 sec  
 TD0 1

==== CHANNEL f1 =====  
 SFO1 500.1330885 MHz  
 NUC1 1H  
 P1 10.59 usec  
 PLW1 20.00000000 W

==== CHANNEL f2 =====  
 SFO2 500.1330885 MHz  
 NUC2 off  
 CPDPRG[2]  
 PCPD2 0 usec  
 PLW2 0 W  
 PLW12 0 W  
 PLW13 0 W

F2 - Processing parameters  
 SI 65536  
 SF 500.1300054 MHz  
 WDW EM  
 SSB 0  
 LB 0.30 Hz  
 GB 0  
 PC 1.00

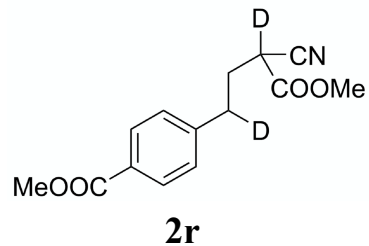

166.83  
 166.23  
 144.27  
 130.09  
 128.83  
 128.57  
 116.03

53.60  
 52.11  
 36.50  
 32.64  
 32.46  
 32.30  
 32.15  
 30.85  
 30.78

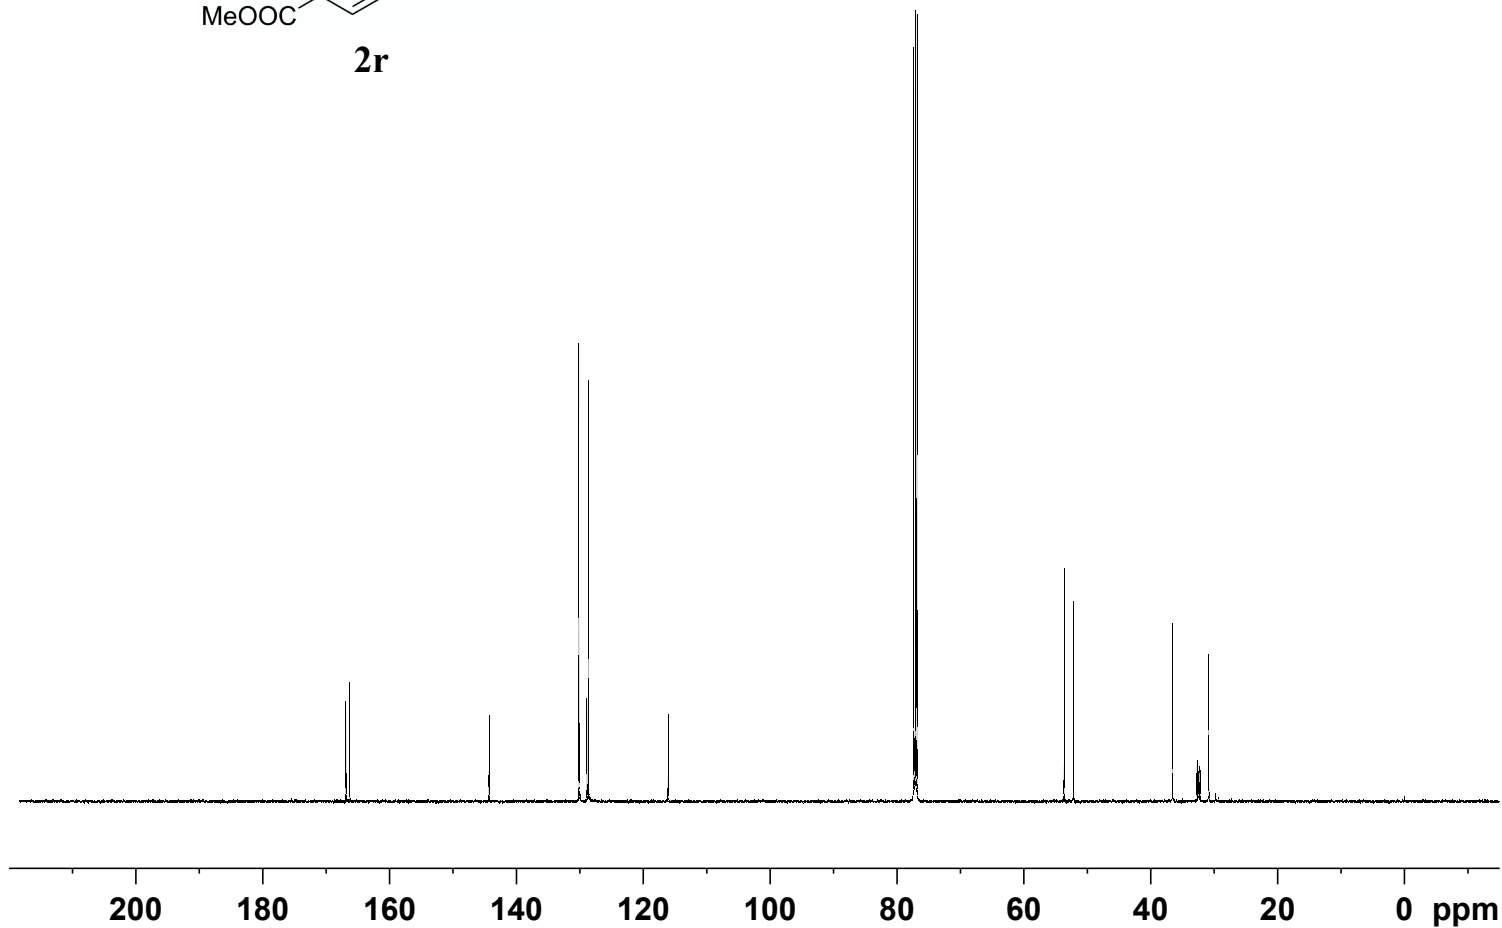

Current Data Parameters  
 NAME 500M-2020xia  
 EXPNO 162  
 PROCNO 1

F2 - Acquisition Parameters  
 Date\_ 20211113  
 Time 8.32  
 INSTRUM spect  
 PROBHD 5 mm CPPBBO BB  
 PULPROG zgpg30  
 TD 65536  
 SOLVENT CDCl3  
 NS 512  
 DS 4  
 SWH 29761.904 Hz  
 FIDRES 0.454131 Hz  
 AQ 1.1010048 sec  
 RG 192.89  
 DW 16.800 usec  
 DE 18.00 usec  
 TE 298.2 K  
 D1 2.00000000 sec  
 D11 0.03000000 sec  
 TD0 1

===== CHANNEL f1 =====  
 SFO1 125.7703637 MHz  
 NUC1 13C  
 P1 9.80 usec  
 PLW1 57.00000000 W

===== CHANNEL f2 =====  
 SFO2 500.1320005 MHz  
 NUC2 1H  
 CPDPRG[2] waltz16  
 PCPD2 80.00 usec  
 PLW2 20.00000000 W  
 PLW12 0.35778001 W  
 PLW13 0.22898000 W

F2 - Processing parameters  
 SI 32768  
 SF 125.7577885 MHz  
 WDW EM  
 SSB 0  
 LB 1.00 Hz  
 GB 0  
 PC 1.40

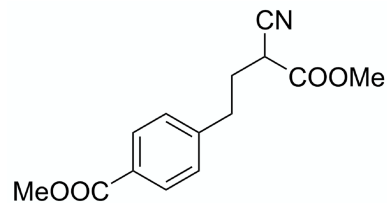

**2r-H**

166.82  
166.24  
— 144.31  
130.09  
128.82  
128.58  
— 116.03

53.59  
52.11  
36.52  
32.64  
30.85

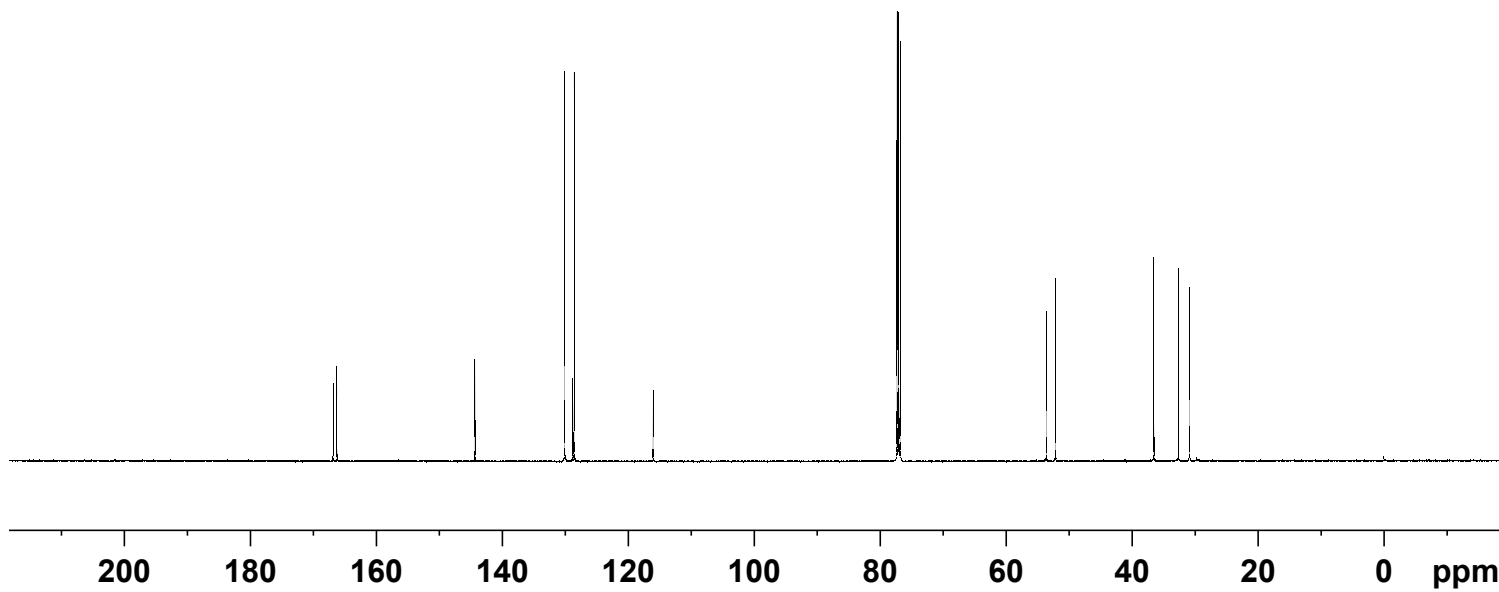

Current Data Parameters  
NAME 500M-2020xia  
EXPNO 160  
PROCNO 1

F2 - Acquisition Parameters  
Date\_ 20211113  
Time 8.01  
INSTRUM spect  
PROBHD 5 mm CPPBBO BB  
PULPROG zgpg30  
TD 65536  
SOLVENT CDCl3  
NS 512  
DS 4  
SWH 29761.904 Hz  
FIDRES 0.454131 Hz  
AQ 1.1010048 sec  
RG 192.89  
DW 16.800 usec  
DE 18.00 usec  
TE 298.2 K  
D1 2.00000000 sec  
D11 0.03000000 sec  
TD0 1

==== CHANNEL f1 =====  
SFO1 125.7703637 MHz  
NUC1 13C  
P1 9.80 usec  
PLW1 57.00000000 W

==== CHANNEL f2 =====  
SFO2 500.1320005 MHz  
NUC2 1H  
CPDPRG[2] waltz16  
PCPD2 80.00 usec  
PLW2 20.00000000 W  
PLW12 0.35778001 W  
PLW13 0.22898000 W

F2 - Processing parameters  
SI 32768  
SF 125.7577885 MHz  
WDW EM  
SSB 0  
LB 1.00 Hz  
GB 0  
PC 1.40

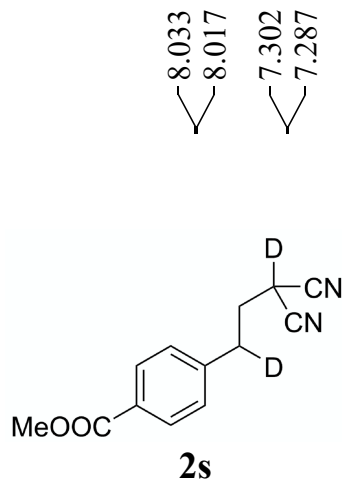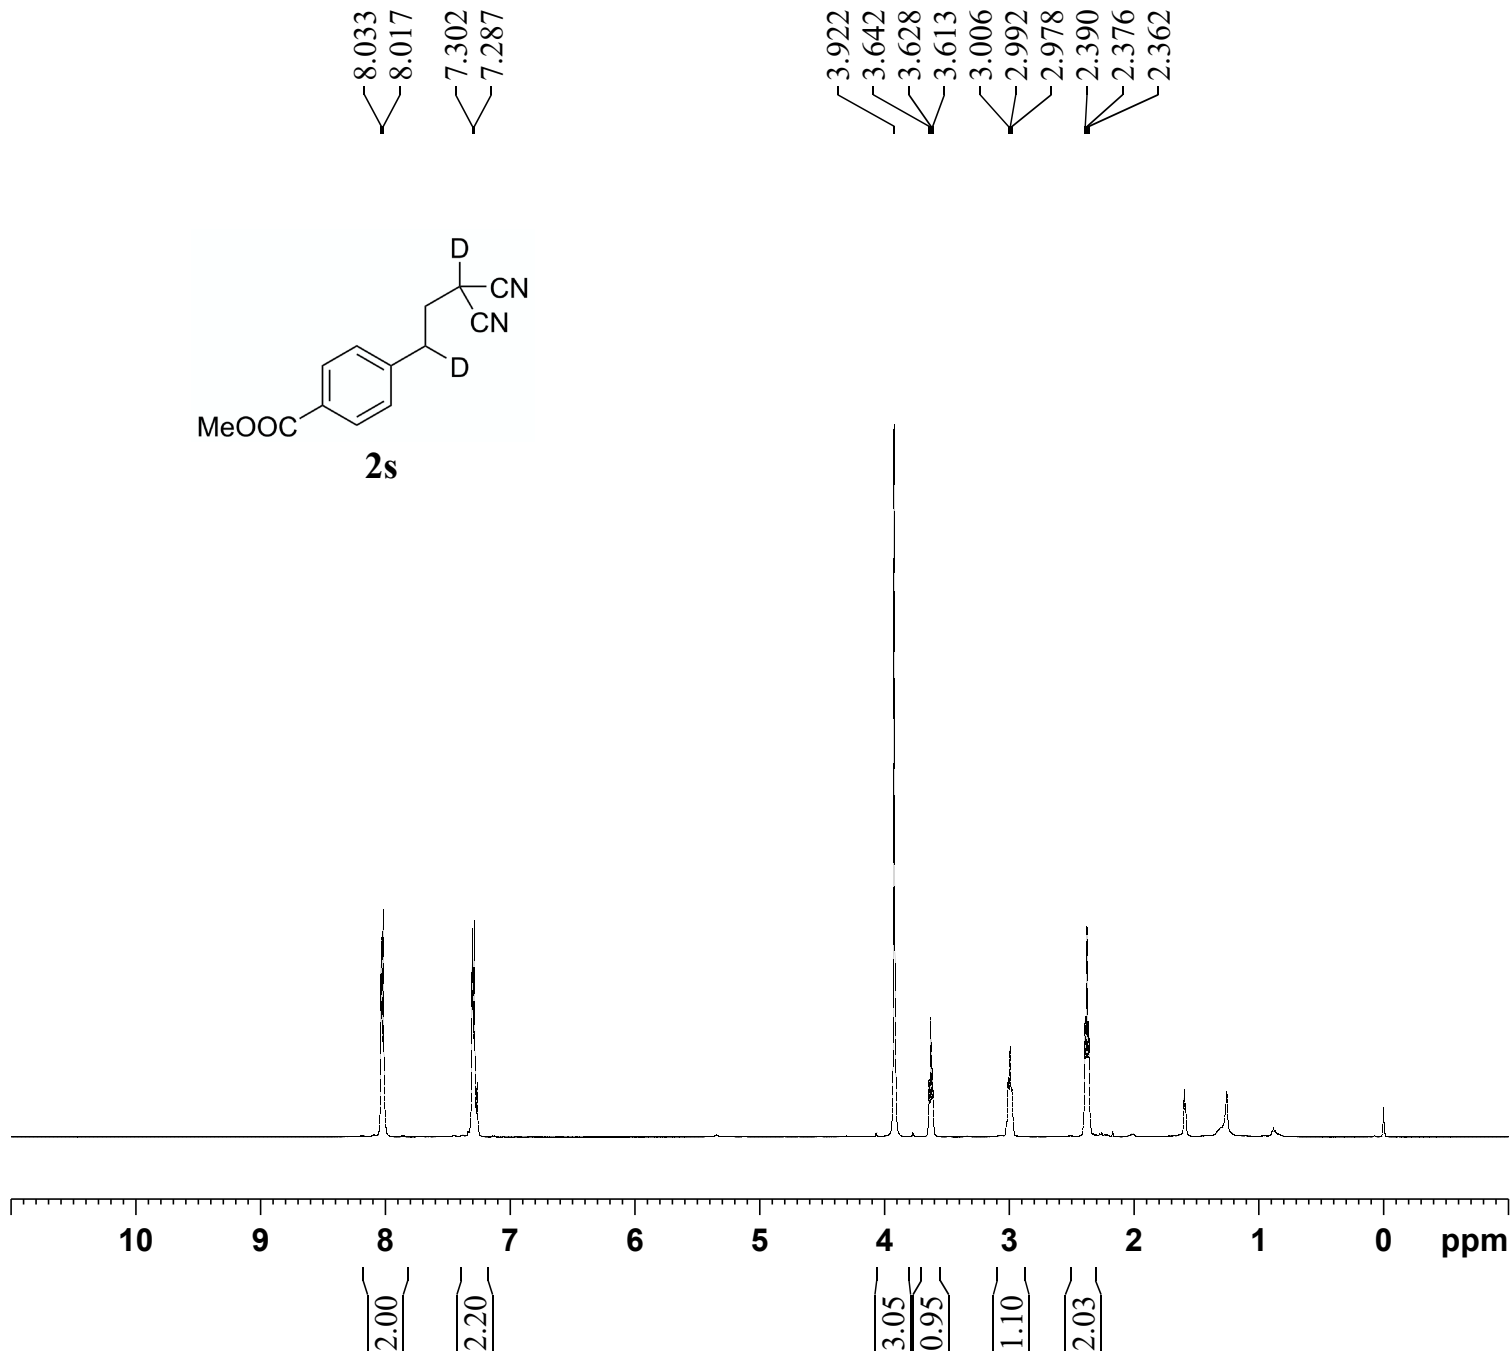

Current Data Parameters  
 NAME 500M-2020xia  
 EXPNO 145  
 PROCNO 1

F2 - Acquisition Parameters  
 Date\_ 20211113  
 Time 3.30  
 INSTRUM spect  
 PROBHD 5 mm CPPBBO BB  
 PULPROG zg30  
 TD 65536  
 SOLVENT CDCl3  
 NS 16  
 DS 2  
 SWH 10000.000 Hz  
 FIDRES 0.152588 Hz  
 AQ 3.2767999 sec  
 RG 62.06  
 DW 50.000 usec  
 DE 6.50 usec  
 TE 298.2 K  
 D1 1.00000000 sec  
 D11 0 sec  
 TD0 1

==== CHANNEL f1 =====  
 SFO1 500.1330885 MHz  
 NUC1 1H  
 P1 10.59 usec  
 PLW1 20.00000000 W

==== CHANNEL f2 =====  
 SFO2 500.1330885 MHz  
 NUC2 off  
 CPDPRG[2]  
 PCPD2 0 usec  
 PLW2 0 W  
 PLW12 0 W  
 PLW13 0 W

F2 - Processing parameters  
 SI 65536  
 SF 500.1300088 MHz  
 WDW EM  
 SSB 0  
 LB 0.30 Hz  
 GB 0  
 PC 1.00

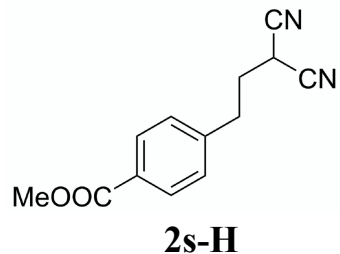

8.028  
8.012  
7.301  
7.286

3.919  
3.659  
3.645  
3.631  
3.019  
3.004  
2.989  
2.403  
2.387  
2.373  
2.358

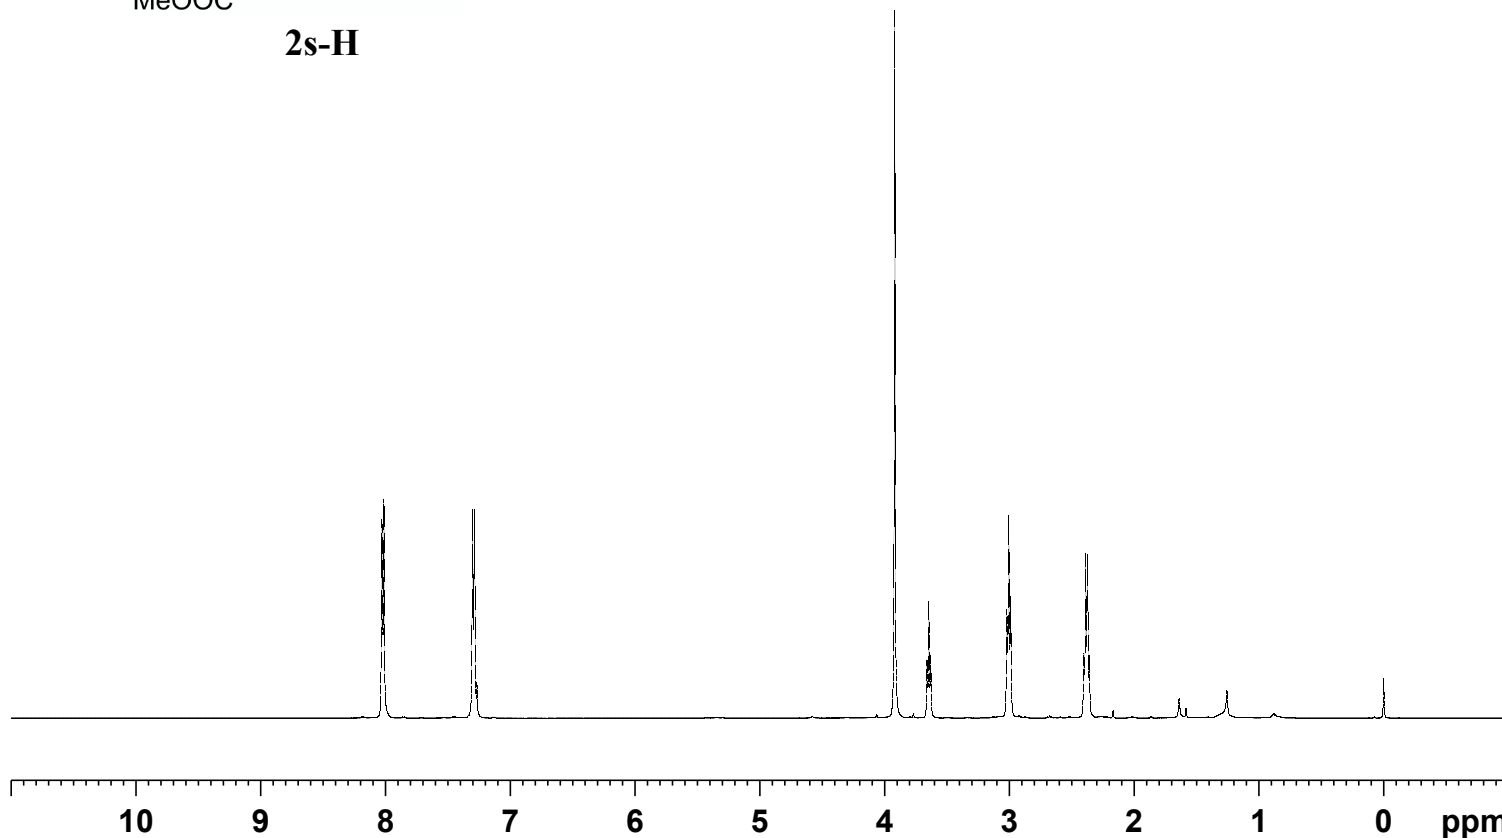

2.07

2.20

3.18

1.00

2.11

2.09

Current Data Parameters  
NAME 500M-2020xia  
EXPNO 143  
PROCNO 1

F2 - Acquisition Parameters  
Date\_ 20211113  
Time 2.59  
INSTRUM spect  
PROBHD 5 mm CPPBBO BB  
PULPROG zg30  
TD 65536  
SOLVENT CDCl3  
NS 16  
DS 2  
SWH 10000.000 Hz  
FIDRES 0.152588 Hz  
AQ 3.2767999 sec  
RG 31.72  
DW 50.000 usec  
DE 6.50 usec  
TE 298.2 K  
D1 1.00000000 sec  
D11 0 sec  
TD0 1

==== CHANNEL f1 =====  
SFO1 500.1330885 MHz  
NUC1 1H  
P1 10.59 usec  
PLW1 20.00000000 W

==== CHANNEL f2 =====  
SFO2 500.1330885 MHz  
NUC2 off  
CPDPRG[2]  
PCPD2 0 usec  
PLW2 0 W  
PLW12 0 W  
PLW13 0 W

F2 - Processing parameters  
SI 65536  
SF 500.1300076 MHz  
WDW EM  
SSB 0  
LB 0.30 Hz  
GB 0  
PC 1.00



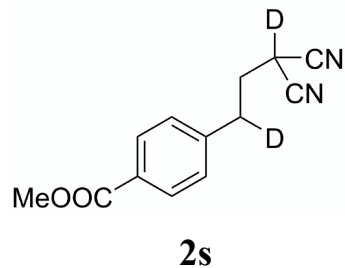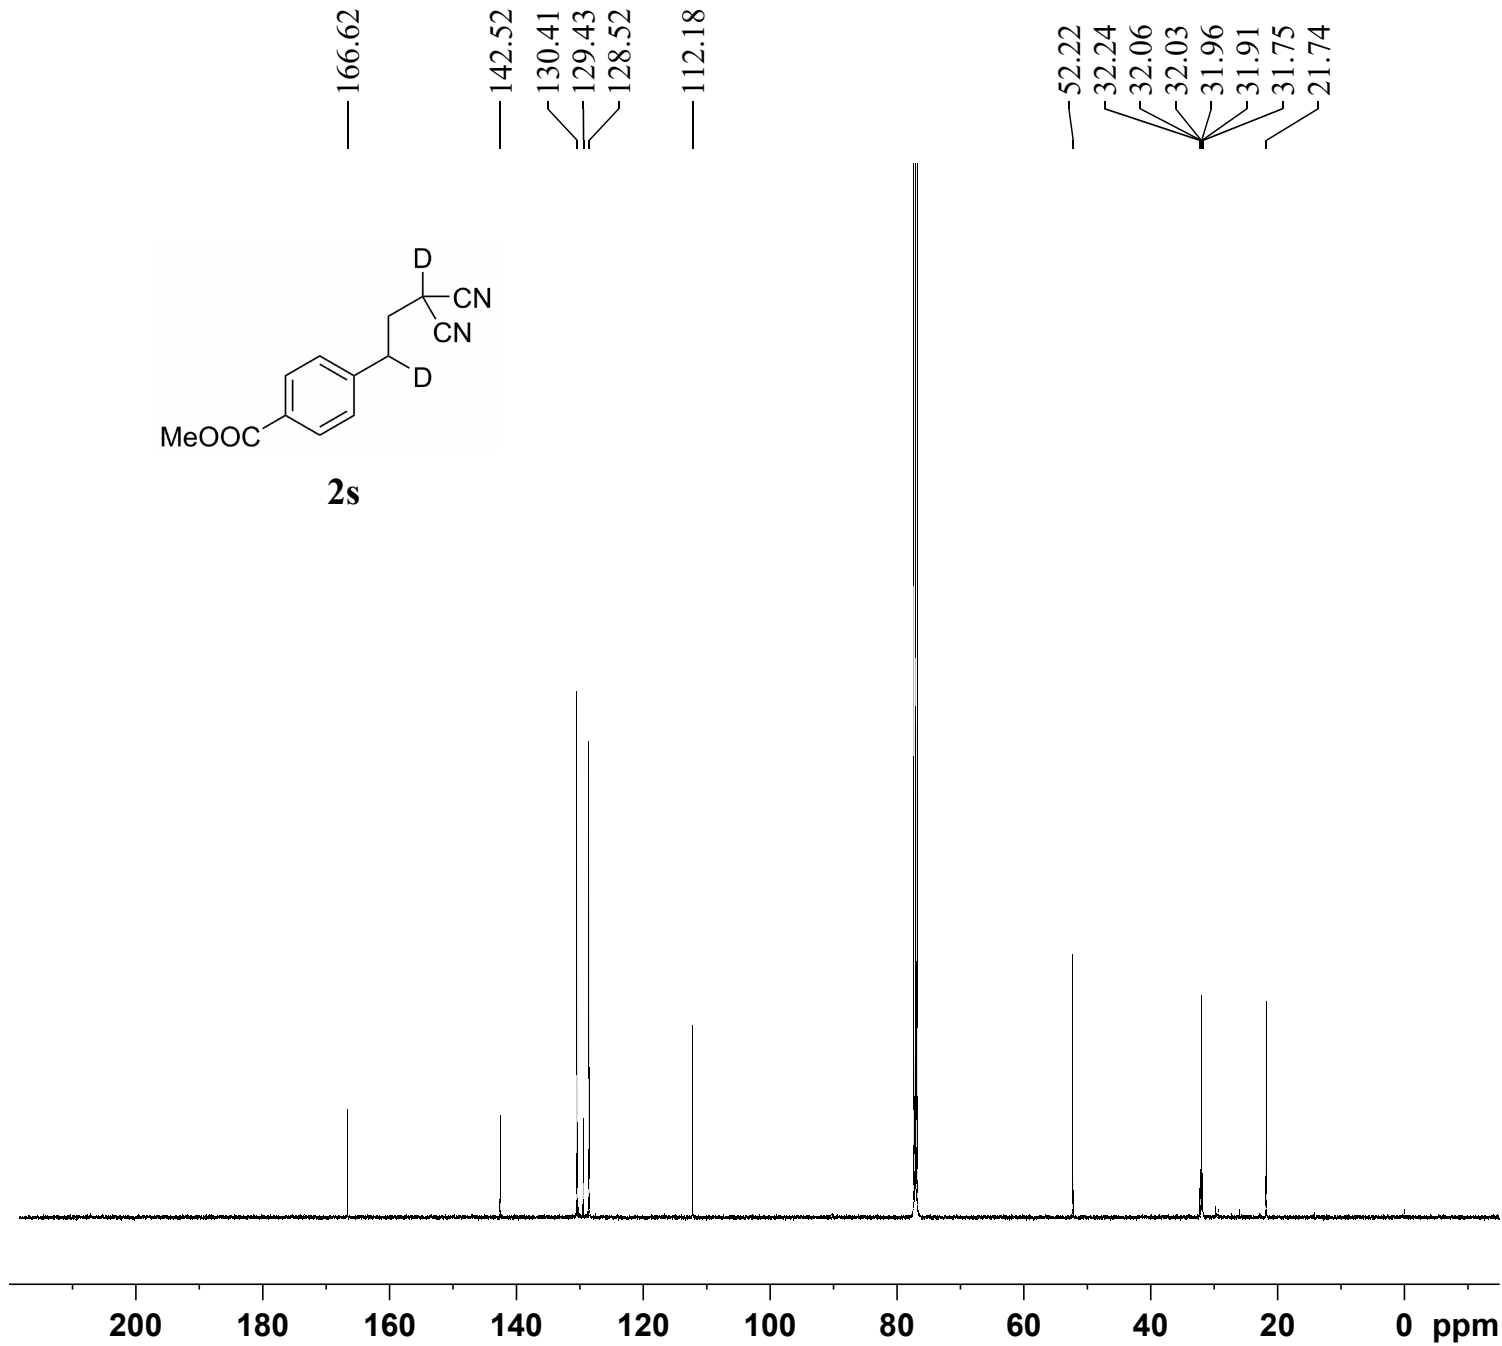

Current Data Parameters  
 NAME 500M-2020xia  
 EXPNO 146  
 PROCNO 1

F2 - Acquisition Parameters  
 Date\_ 20211113  
 Time 3.58  
 INSTRUM spect  
 PROBHD 5 mm CPPBBO BB  
 PULPROG zgpg30  
 TD 65536  
 SOLVENT CDC13  
 NS 512  
 DS 4  
 SWH 29761.904 Hz  
 FIDRES 0.454131 Hz  
 AQ 1.1010048 sec  
 RG 192.89  
 DW 16.800 usec  
 DE 18.00 usec  
 TE 298.2 K  
 D1 2.00000000 sec  
 D11 0.03000000 sec  
 TD0 1

==== CHANNEL f1 =====  
 SFO1 125.7703637 MHz  
 NUC1 13C  
 P1 9.80 usec  
 PLW1 57.00000000 W

==== CHANNEL f2 =====  
 SFO2 500.1320005 MHz  
 NUC2 1H  
 CPDPRG[2] waltz16  
 PCPD2 80.00 usec  
 PLW2 20.00000000 W  
 PLW12 0.35778001 W  
 PLW13 0.22898000 W

F2 - Processing parameters  
 SI 32768  
 SF 125.7577885 MHz  
 WDW EM  
 SSB 0  
 LB 1.00 Hz  
 GB 0  
 PC 1.40

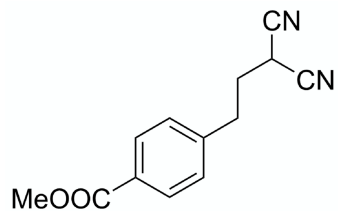

**2s-H**

— 166.63  
 — 142.60  
 130.39  
 129.40  
 128.53  
 — 112.21

— 52.21  
 32.24  
 32.00  
 — 21.77

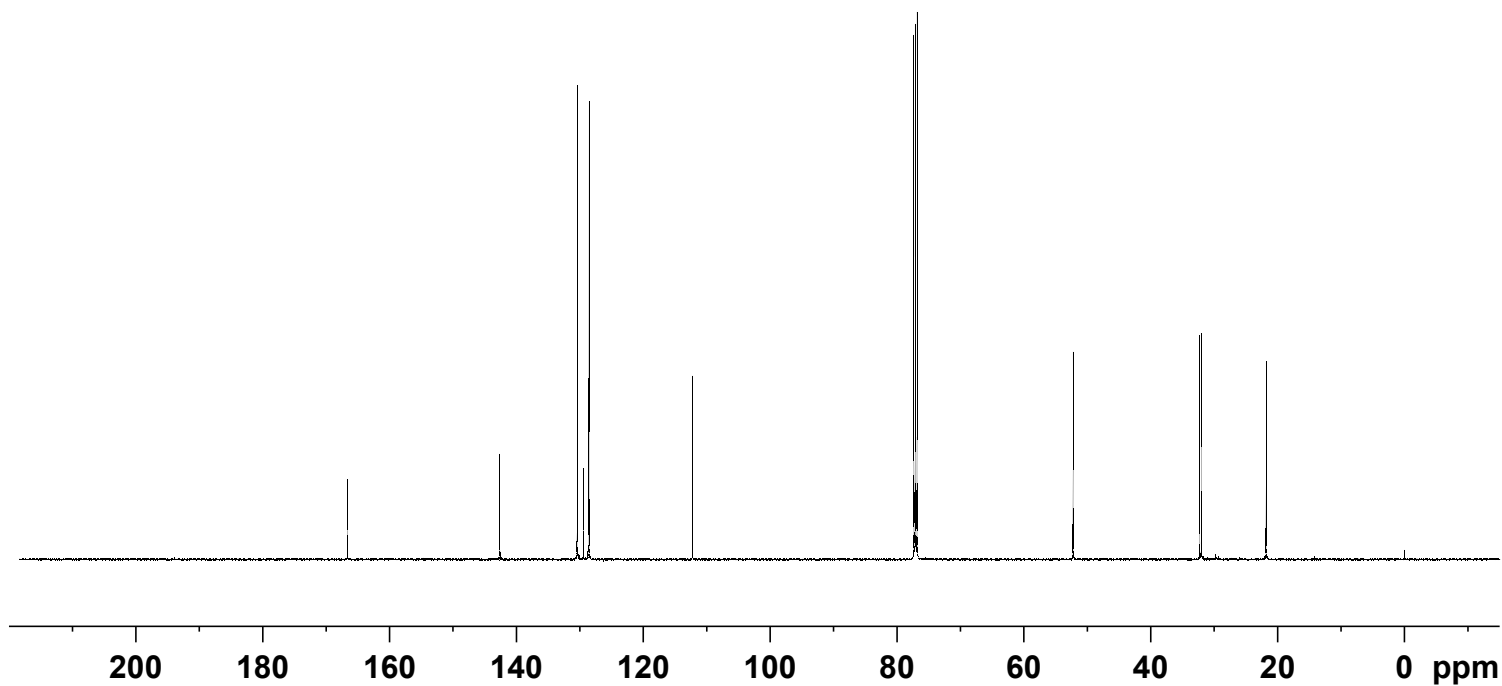

Current Data Parameters  
 NAME 500M-2020xia  
 EXPNO 144  
 PROCNO 1

F2 - Acquisition Parameters  
 Date\_ 20211113  
 Time 3.27  
 INSTRUM spect  
 PROBHD 5 mm CPPBBO BB  
 PULPROG zgpg30  
 TD 65536  
 SOLVENT CDC13  
 NS 512  
 DS 4  
 SWH 29761.904 Hz  
 FIDRES 0.454131 Hz  
 AQ 1.1010048 sec  
 RG 192.89  
 DW 16.800 usec  
 DE 18.00 usec  
 TE 298.2 K  
 D1 2.00000000 sec  
 D11 0.03000000 sec  
 TD0 1

==== CHANNEL f1 =====  
 SFO1 125.7703637 MHz  
 NUC1 13C  
 P1 9.80 usec  
 PLW1 57.00000000 W

==== CHANNEL f2 =====  
 SFO2 500.1320005 MHz  
 NUC2 1H  
 CPDPRG[2] waltz16  
 PCPD2 80.00 usec  
 PLW2 20.00000000 W  
 PLW12 0.35778001 W  
 PLW13 0.22898000 W

F2 - Processing parameters  
 SI 32768  
 SF 125.7577890 MHz  
 WDW EM  
 SSB 0  
 LB 1.00 Hz  
 GB 0  
 PC 1.40

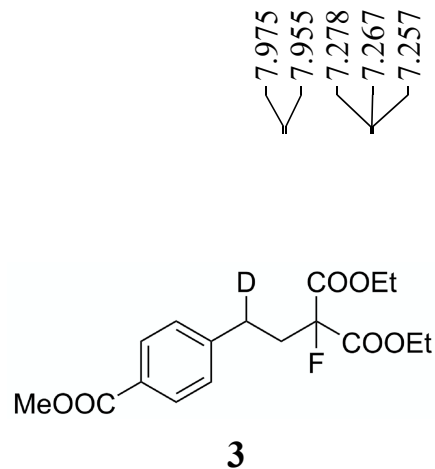

7.975  
7.955  
7.278  
7.267  
7.257

4.311  
4.293  
4.276  
4.258  
3.905  
2.813  
2.794  
2.773  
2.754  
2.516  
2.494  
2.460  
2.438  
1.330  
1.312  
1.294

Current Data Parameters  
NAME 400M-2022  
EXPNO 15  
PROCNO 1

F2 - Acquisition Parameters  
Date\_ 20220701  
Time 7.15  
INSTRUM spect  
PROBHD 5 mm PABBO BB/  
PULPROG zg30  
TD 32768  
SOLVENT CDCl3  
NS 16  
DS 0  
SWH 8012.820 Hz  
FIDRES 0.244532 Hz  
AQ 2.0447233 sec  
RG 116.67  
DW 62.400 usec  
DE 6.50 usec  
TE 300.9 K  
D1 2.00000000 sec  
D11 0 sec  
TD0 1

==== CHANNEL f1 =====  
SFO1 400.2424716 MHz  
NUC1 1H  
P1 14.30 usec  
PLW1 12.00000000 W

==== CHANNEL f2 =====  
SFO2 400.2424716 MHz  
NUC2 off  
CPDPRG[2]  
PCPD2 0 usec  
PLW2 0 W  
PLW12 0 W  
PLW13 0 W

F2 - Processing parameters  
SI 65536  
SF 400.2400066 MHz  
WDW EM  
SSB 0  
LB 0.30 Hz  
GB 0  
PC 1.00

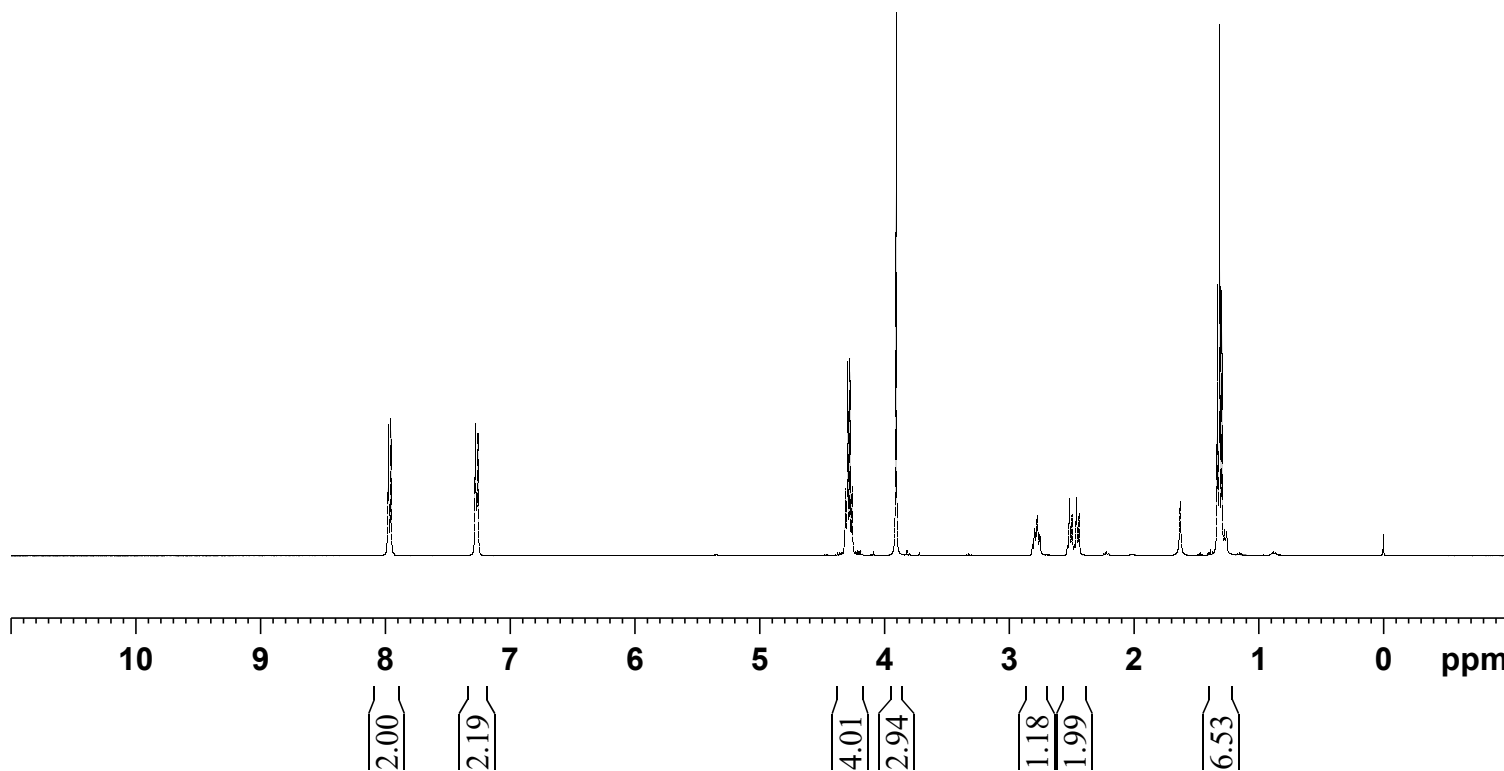

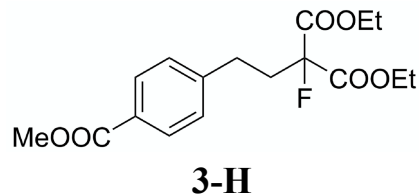

7.975  
 7.954  
 7.277  
 7.266  
 7.257

4.329  
 4.311  
 4.293  
 4.275  
 4.258  
 3.905  
 2.813  
 2.793  
 2.783  
 2.771  
 2.534  
 2.521  
 2.512  
 2.507  
 2.492  
 2.477  
 2.465  
 2.456  
 2.450  
 2.436  
 1.330  
 1.312  
 1.294

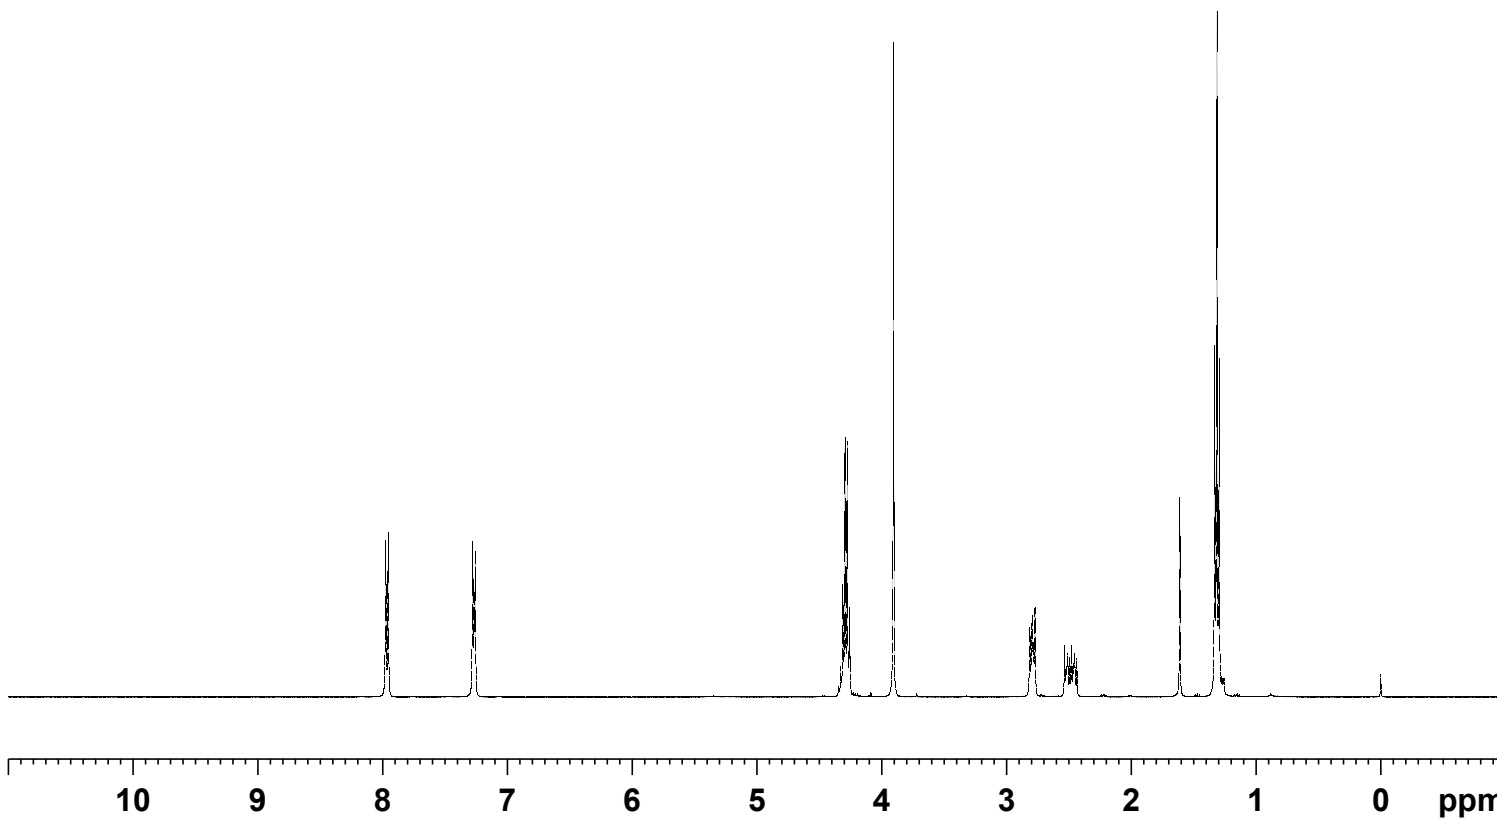

Current Data Parameters  
 NAME 400M-2022  
 EXPNO 17  
 PROCNO 1

F2 - Acquisition Parameters  
 Date\_ 20220701  
 Time 7.48  
 INSTRUM spect  
 PROBHD 5 mm PABBO BB/  
 PULPROG zg30  
 TD 32768  
 SOLVENT CDCl3  
 NS 16  
 DS 0  
 SWH 8012.820 Hz  
 FIDRES 0.244532 Hz  
 AQ 2.0447233 sec  
 RG 206.33  
 DW 62.400 usec  
 DE 6.50 usec  
 TE 301.0 K  
 D1 2.00000000 sec  
 D11 0 sec  
 TD0 1

===== CHANNEL f1 =====  
 SFO1 400.2424716 MHz  
 NUC1 1H  
 P1 14.30 usec  
 PLW1 12.00000000 W

===== CHANNEL f2 =====  
 SFO2 400.2424716 MHz  
 NUC2 off  
 CPDPRG[2]  
 PCPD2 0 usec  
 PLW2 0 W  
 PLW12 0 W  
 PLW13 0 W

F2 - Processing parameters  
 SI 65536  
 SF 400.2400072 MHz  
 WDW EM  
 SSB 0  
 LB 0.30 Hz  
 GB 0  
 PC 1.00

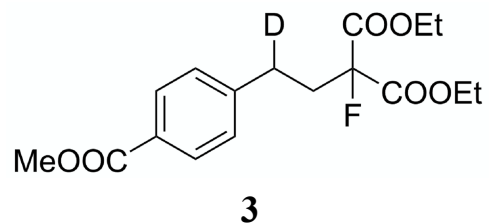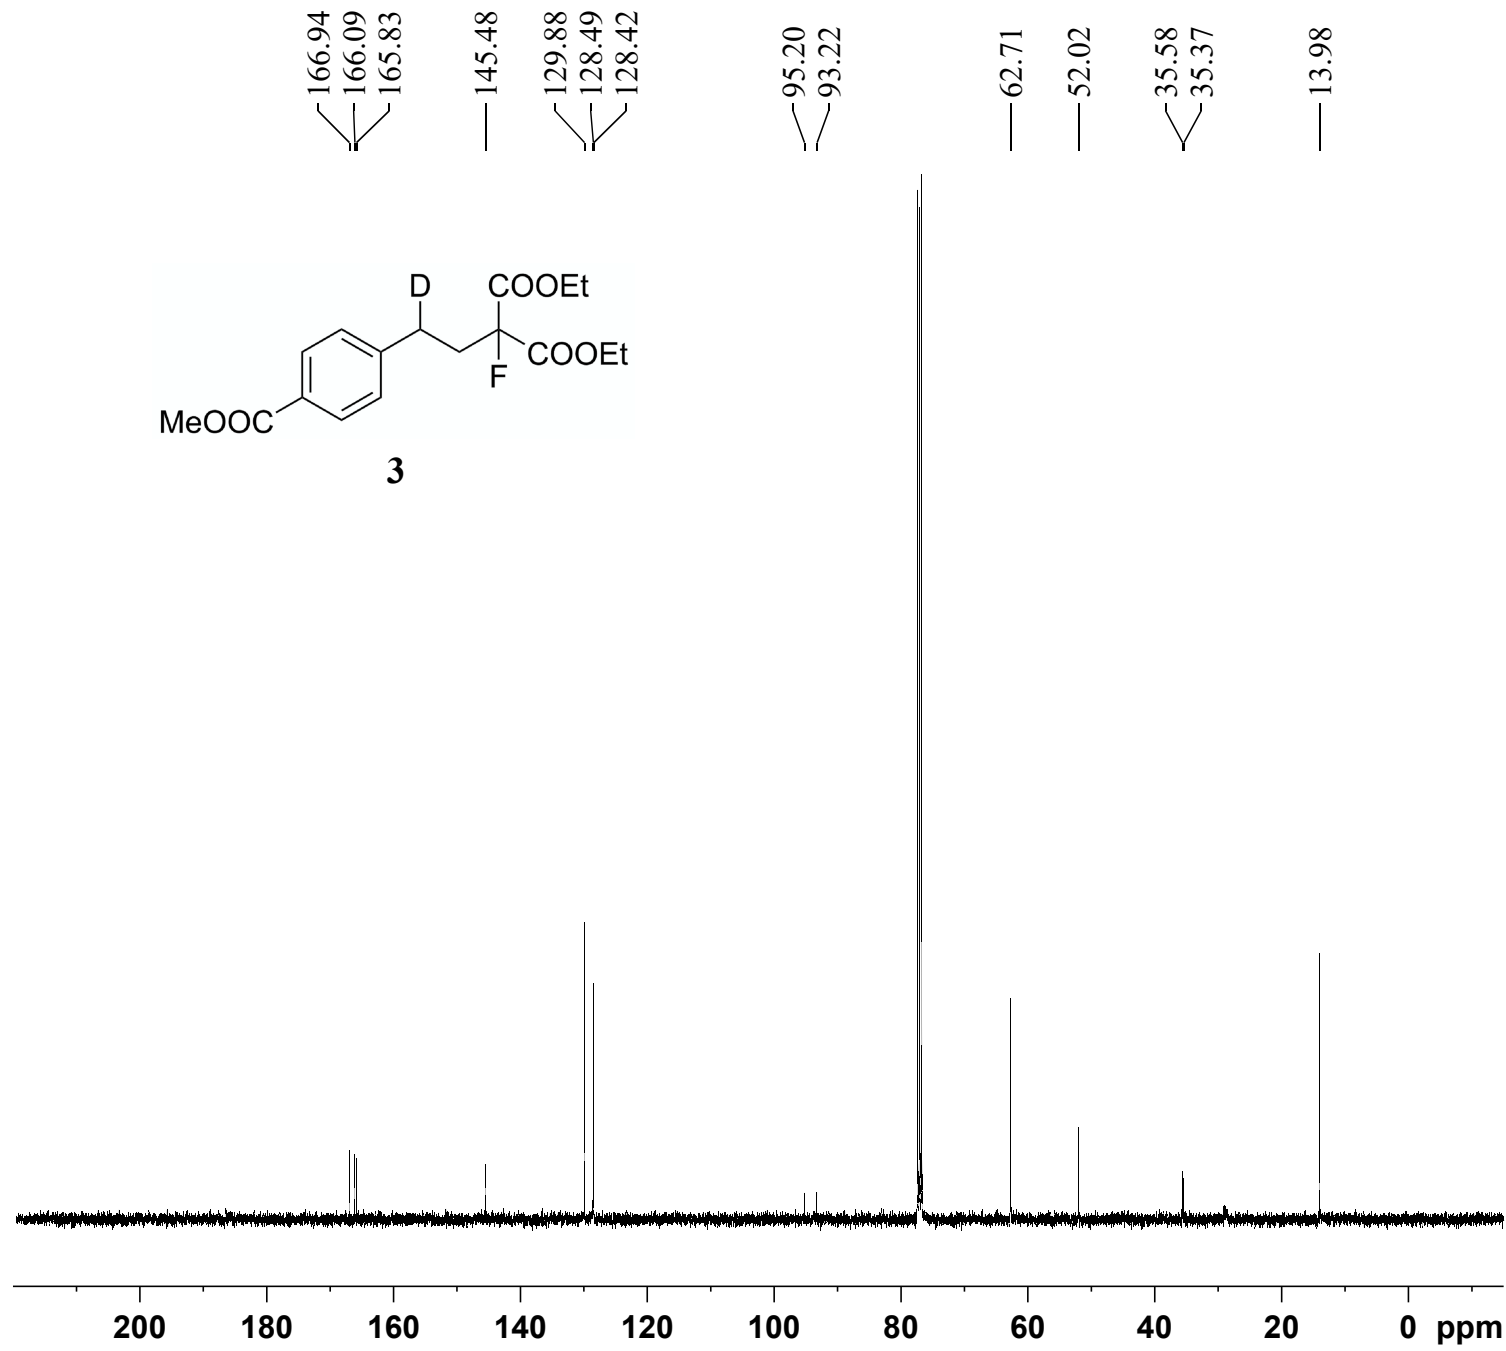

Current Data Parameters  
 NAME 400M-2022  
 EXPNO 16  
 PROCNO 1

F2 - Acquisition Parameters  
 Date\_ 20220701  
 Time 7.45  
 INSTRUM spect  
 PROBHD 5 mm PABBO BB/  
 PULPROG zgpg30  
 TD 65536  
 SOLVENT CDCl3  
 NS 512  
 DS 4  
 SWH 24038.461 Hz  
 FIDRES 0.366798 Hz  
 AQ 1.3631488 sec  
 RG 206.33  
 DW 20.800 usec  
 DE 6.50 usec  
 TE 301.7 K  
 D1 2.0000000 sec  
 D11 0.0300000 sec  
 TD0 1

==== CHANNEL f1 =====  
 SFO1 100.6504916 MHz  
 NUC1 13C  
 P1 10.00 usec  
 PLW1 54.0000000 W

==== CHANNEL f2 =====  
 SFO2 400.2416010 MHz  
 NUC2 1H  
 CPDPRG[2] waltz16  
 PCPD2 90.00 usec  
 PLW2 12.0000000 W  
 PLW12 0.30294999 W  
 PLW13 0.24539000 W

F2 - Processing parameters  
 SI 32768  
 SF 100.6404280 MHz  
 WDW EM  
 SSB 0  
 LB 1.00 Hz  
 GB 0  
 PC 1.40

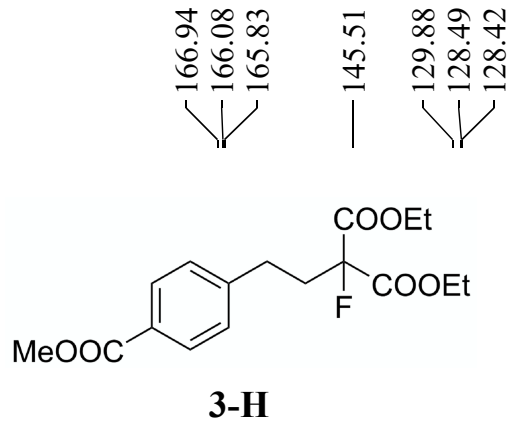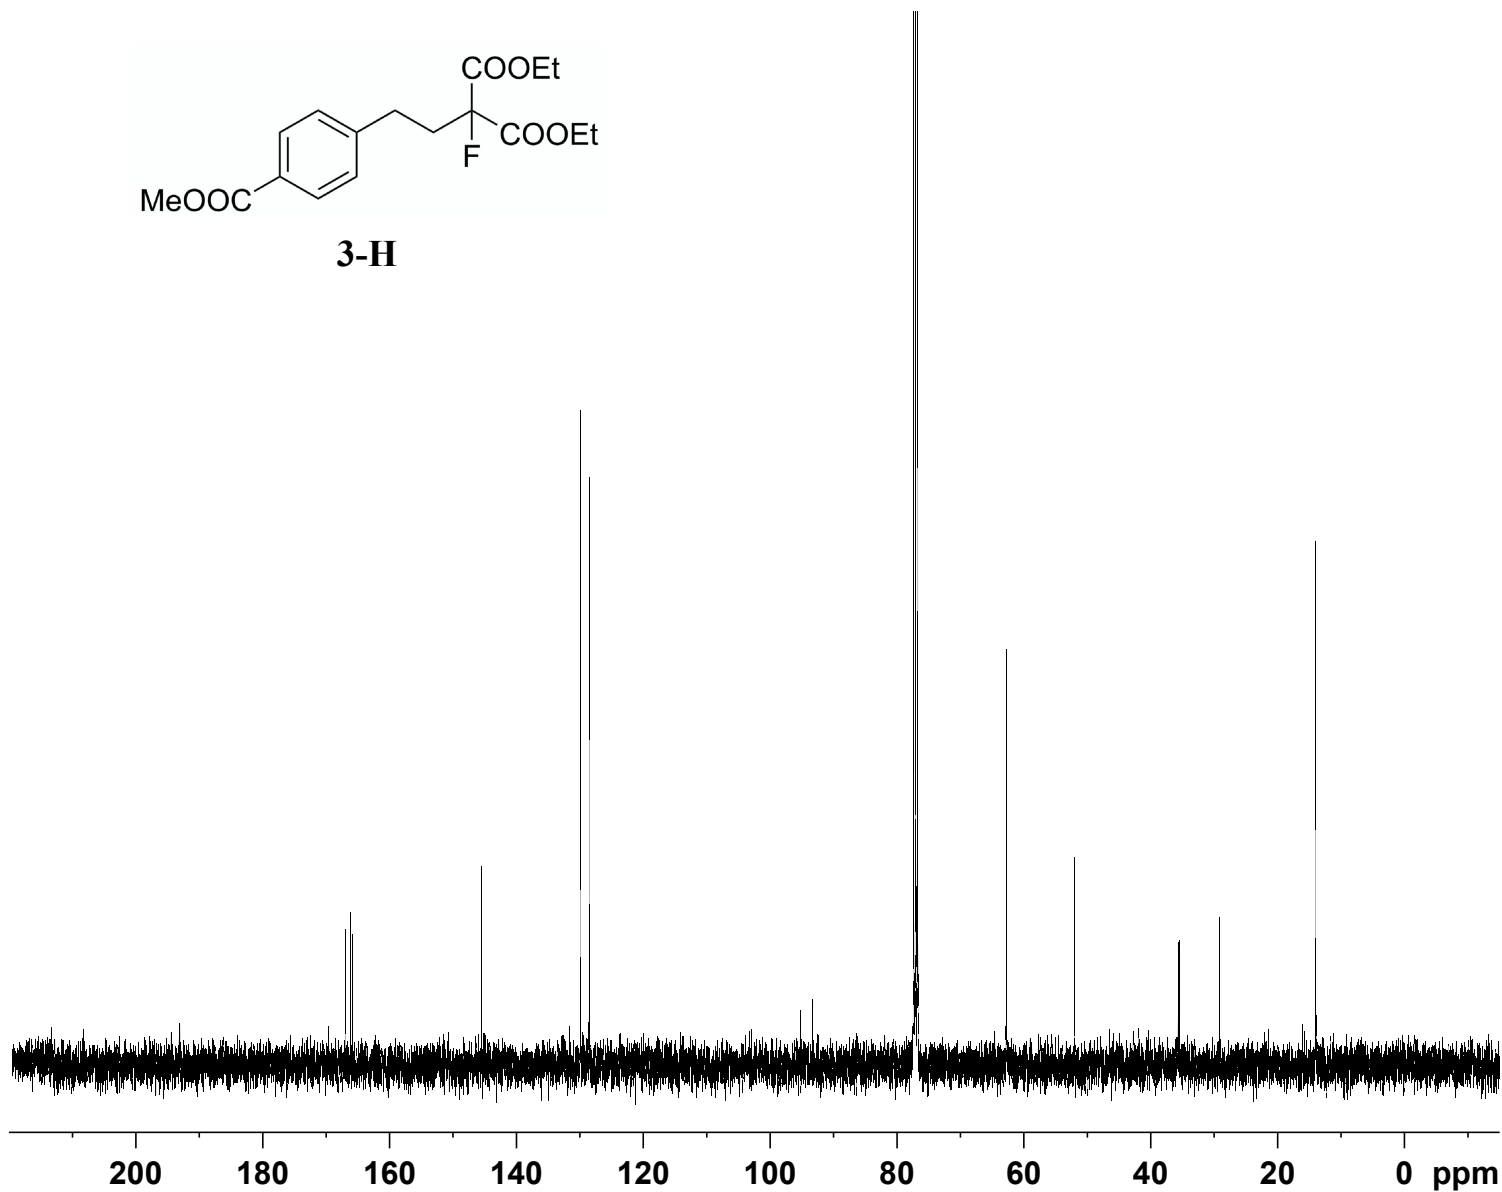

Current Data Parameters  
 NAME 400M-2022  
 EXPNO 18  
 PROCNO 1

F2 - Acquisition Parameters  
 Date\_ 20220701  
 Time 8.03  
 INSTRUM spect  
 PROBHD 5 mm PABBO BB/  
 PULPROG zgpg30  
 TD 65536  
 SOLVENT CDCl3  
 NS 256  
 DS 4  
 SWH 24038.461 Hz  
 FIDRES 0.366798 Hz  
 AQ 1.3631488 sec  
 RG 206.33  
 DW 20.800 usec  
 DE 6.50 usec  
 TE 301.8 K  
 D1 2.0000000 sec  
 D11 0.0300000 sec  
 TD0 1

==== CHANNEL f1 =====  
 SFO1 100.6504916 MHz  
 NUC1 13C  
 P1 10.00 usec  
 PLW1 54.0000000 W

==== CHANNEL f2 =====  
 SFO2 400.2416010 MHz  
 NUC2 1H  
 CPDPRG[2] waltz16  
 PCPD2 90.00 usec  
 PLW2 12.0000000 W  
 PLW12 0.30294999 W  
 PLW13 0.24539000 W

F2 - Processing parameters  
 SI 32768  
 SF 100.6404280 MHz  
 WDW EM  
 SSB 0  
 LB 1.00 Hz  
 GB 0  
 PC 1.40

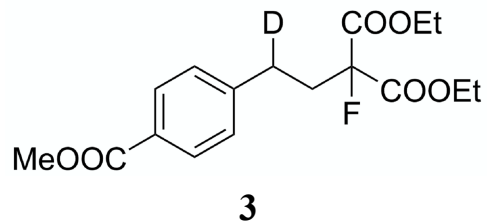

— -167.44

Current Data Parameters  
 NAME 400M-2023-F  
 EXPNO 7  
 PROCNO 1

F2 - Acquisition Parameters  
 Date\_ 20230506  
 Time 19.07  
 INSTRUM spect  
 PROBHD 5 mm PABBO BB/  
 PULPROG zgfhigqn.2  
 TD 131072  
 SOLVENT CDC13  
 NS 16  
 DS 4  
 SWH 89285.711 Hz  
 FIDRES 0.681196 Hz  
 AQ 0.7340032 sec  
 RG 206.33  
 DW 5.600 usec  
 DE 6.50 usec  
 TE 298.0 K  
 D1 1.00000000 sec  
 D11 0.03000000 sec  
 TD0 1

==== CHANNEL f1 =====  
 SFO1 376.5642094 MHz  
 NUC1 19F  
 P1 14.50 usec  
 PLW1 17.98900032 W

==== CHANNEL f2 =====  
 SFO2 400.2416010 MHz  
 NUC2 1H  
 CPDPRG[2] waltz16  
 PCPD2 90.00 usec  
 PLW2 12.00000000 W  
 PLW12 0.30294999 W  
 PLW13 0.24539000 W

F2 - Processing parameters  
 SI 65536  
 SF 376.6018696 MHz  
 WDW EM  
 SSB 0  
 LB 0.30 Hz  
 GB 0  
 PC 1.00

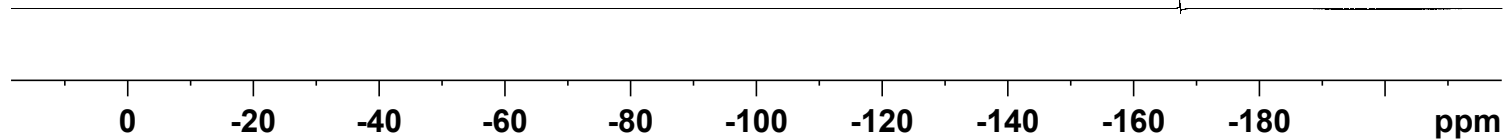

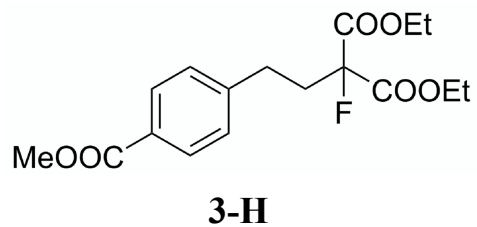

— -167.46

Current Data Parameters  
 NAME 400M-2023-F  
 EXPNO 6  
 PROCNO 1

F2 - Acquisition Parameters  
 Date\_ 20230506  
 Time 19.05  
 INSTRUM spect  
 PROBHD 5 mm PABBO BB/  
 PULPROG zgfhigqn.2  
 TD 131072  
 SOLVENT CDCl3  
 NS 16  
 DS 4  
 SWH 89285.711 Hz  
 FIDRES 0.681196 Hz  
 AQ 0.7340032 sec  
 RG 206.33  
 DW 5.600 usec  
 DE 6.50 usec  
 TE 298.0 K  
 D1 1.00000000 sec  
 D11 0.03000000 sec  
 TD0 1

==== CHANNEL f1 =====  
 SFO1 376.5642094 MHz  
 NUC1 19F  
 P1 14.50 usec  
 PLW1 17.98900032 W

==== CHANNEL f2 =====  
 SFO2 400.2416010 MHz  
 NUC2 1H  
 CPDPRG[2] waltz16  
 PCPD2 90.00 usec  
 PLW2 12.00000000 W  
 PLW12 0.30294999 W  
 PLW13 0.24539000 W

F2 - Processing parameters  
 SI 65536  
 SF 376.6018696 MHz  
 WDW EM  
 SSB 0  
 LB 0.30 Hz  
 GB 0  
 PC 1.00

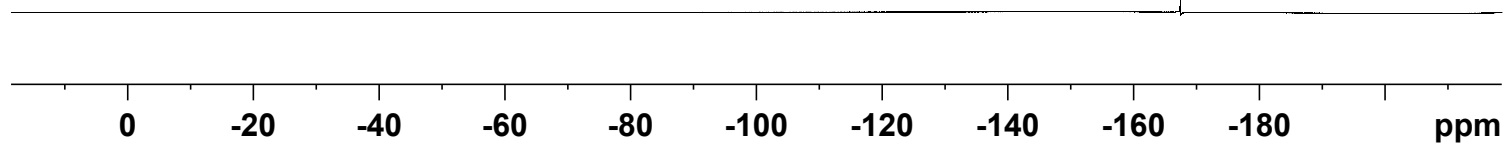



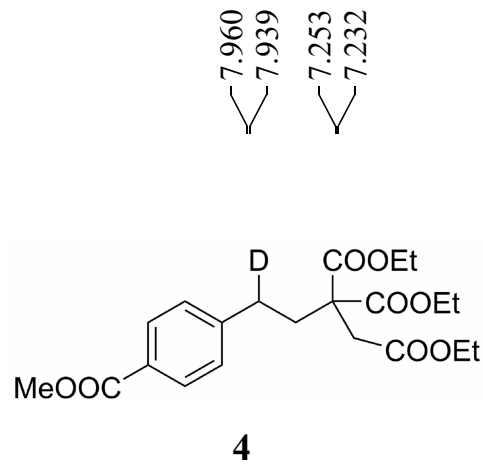

7.960  
7.939  
7.253  
7.232

4.251  
4.233  
4.216  
4.198  
4.160  
4.142  
4.125  
4.107  
3.899  
3.040  
2.646  
2.625  
2.604  
2.326  
2.307  
2.285  
1.295  
1.278  
1.260  
1.243  
1.226

Current Data Parameters  
NAME 400M-2022  
EXPNO 19  
PROCNO 1

F2 - Acquisition Parameters  
Date\_ 20220701  
Time 8.07  
INSTRUM spect  
PROBHD 5 mm PABBO BB/  
PULPROG zg30  
TD 32768  
SOLVENT CDCl3  
NS 16  
DS 0  
SWH 8012.820 Hz  
FIDRES 0.244532 Hz  
AQ 2.0447233 sec  
RG 73.9  
DW 62.400 usec  
DE 6.50 usec  
TE 301.2 K  
D1 2.00000000 sec  
D11 0 sec  
TD0 1

==== CHANNEL f1 =====  
SFO1 400.2424716 MHz  
NUC1 1H  
P1 14.30 usec  
PLW1 12.00000000 W

==== CHANNEL f2 =====  
SFO2 400.2424716 MHz  
NUC2 off  
CPDPRG[2]  
PCPD2 0 usec  
PLW2 0 W  
PLW12 0 W  
PLW13 0 W

F2 - Processing parameters  
SI 65536  
SF 400.2400021 MHz  
WDW EM  
SSB 0  
LB 0.30 Hz  
GB 0  
PC 1.00

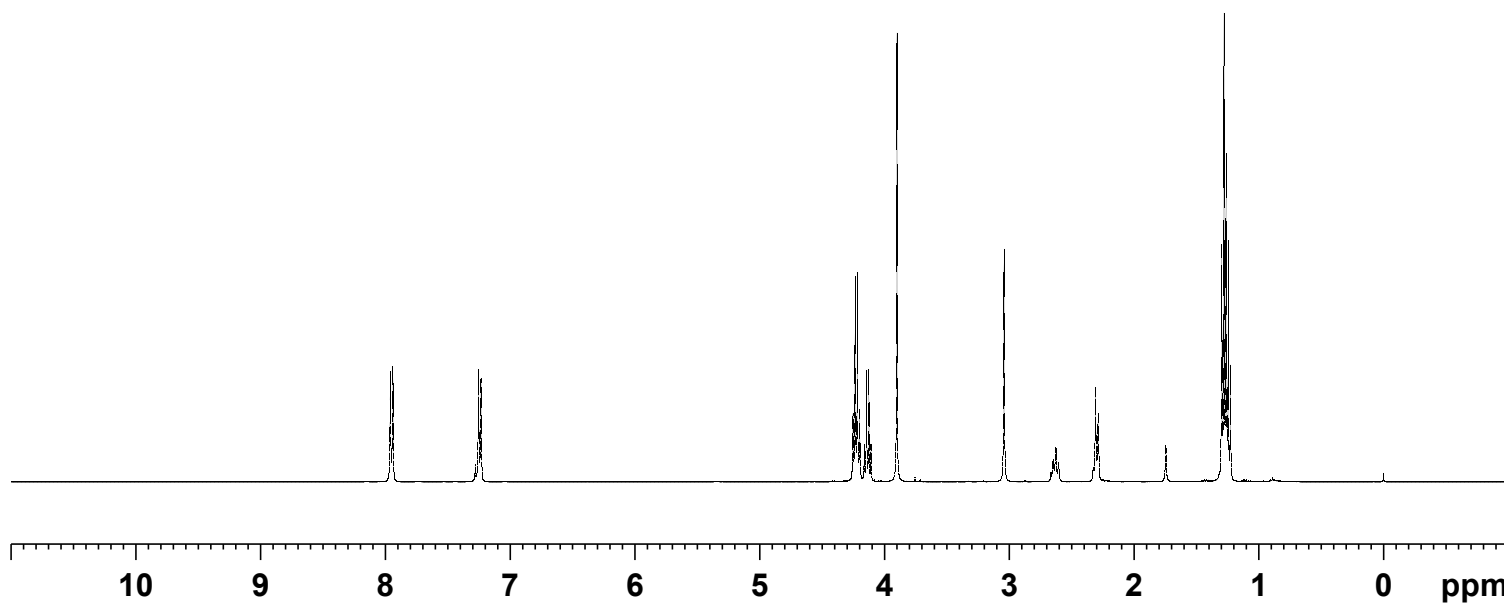

2.00  
2.10

3.98  
2.00  
3.05

1.97  
1.16  
1.97

9.31

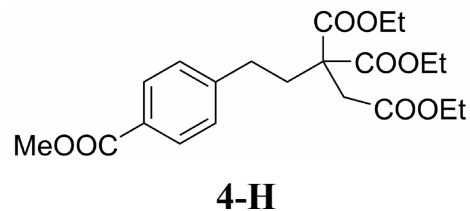

7.959 7.939 7.252 7.231  
 4.250 4.232 4.215 4.197 4.160 4.142 4.124 4.106 3.899 3.040 2.664 2.650 2.643 2.633 2.621 2.325 2.313 2.303 2.295 2.282 1.295 1.277 1.259 1.243 1.225

Current Data Parameters  
 NAME 400M-2022  
 EXPNO 21  
 PROCNO 1

F2 - Acquisition Parameters  
 Date\_ 20220701  
 Time 8.40  
 INSTRUM spect  
 PROBHD 5 mm PABBO BB/  
 PULPROG zg30  
 TD 32768  
 SOLVENT CDCl3  
 NS 16  
 DS 0  
 SWH 8012.820 Hz  
 FIDRES 0.244532 Hz  
 AQ 2.0447233 sec  
 RG 80.72  
 DW 62.400 usec  
 DE 6.50 usec  
 TE 301.2 K  
 D1 2.00000000 sec  
 D11 0 sec  
 TD0 1

===== CHANNEL f1 =====  
 SFO1 400.2424716 MHz  
 NUC1 1H  
 P1 14.30 usec  
 PLW1 12.00000000 W

===== CHANNEL f2 =====  
 SFO2 400.2424716 MHz  
 NUC2 off  
 CPDPRG[2]  
 PCPD2 0 usec  
 PLW2 0 W  
 PLW12 0 W  
 PLW13 0 W

F2 - Processing parameters  
 SI 65536  
 SF 400.2400042 MHz  
 WDW EM  
 SSB 0  
 LB 0.30 Hz  
 GB 0  
 PC 1.00

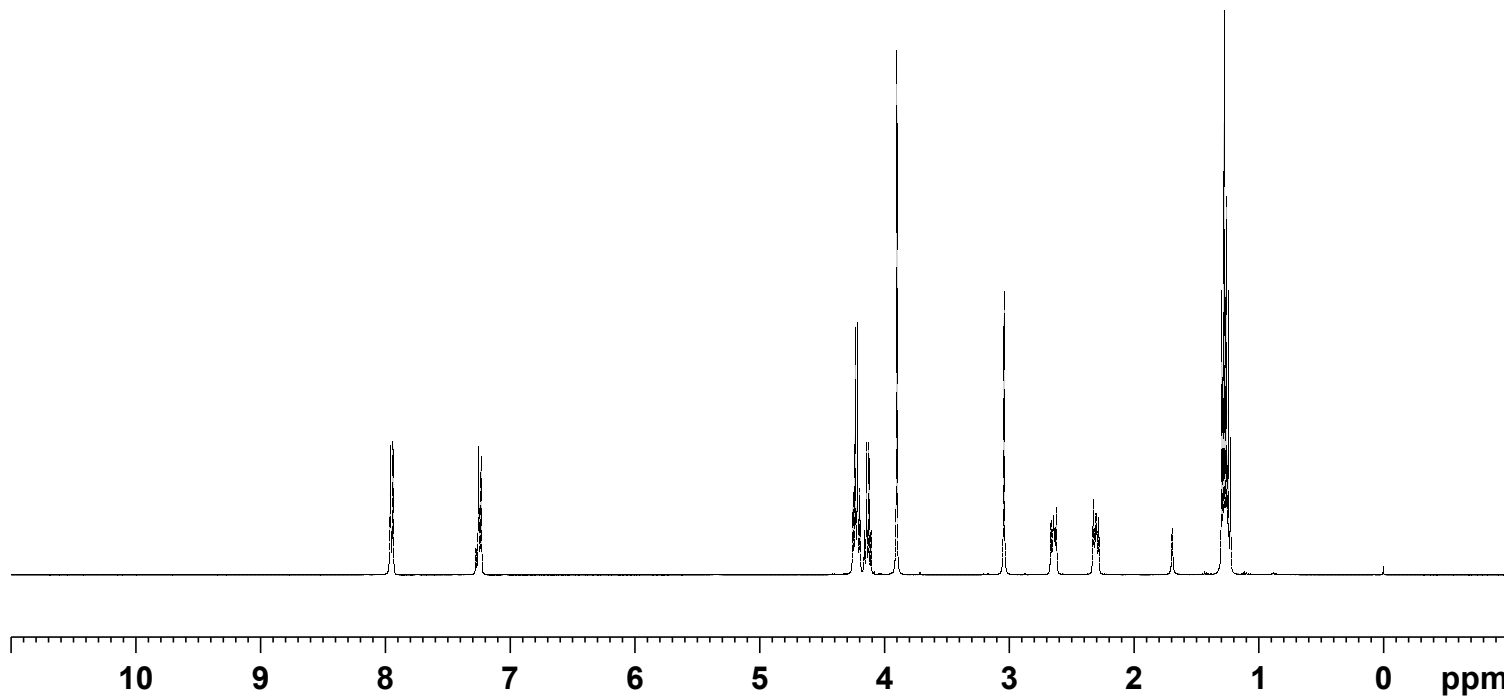

2.00 2.14 4.07 2.04 3.02 2.02 2.02 2.02 9.44

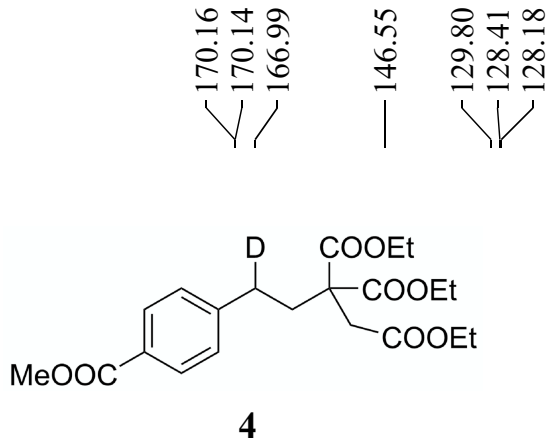

61.73  
60.79  
55.47  
51.96  
37.82  
34.61  
30.99  
30.85  
30.66  
30.46  
14.09  
14.00

Current Data Parameters  
NAME 400M-2022  
EXPNO 20  
PROCNO 1

F2 - Acquisition Parameters  
Date\_ 20220701  
Time 8.37  
INSTRUM spect  
PROBHD 5 mm PABBO BB/  
PULPROG zgpg30  
TD 65536  
SOLVENT CDC13  
NS 512  
DS 4  
SWH 24038.461 Hz  
FIDRES 0.366798 Hz  
AQ 1.3631488 sec  
RG 206.33  
DW 20.800 usec  
DE 6.50 usec  
TE 302.0 K  
D1 2.00000000 sec  
D11 0.03000000 sec  
TD0 1

==== CHANNEL f1 =====  
SFO1 100.6504916 MHz  
NUC1 13C  
P1 10.00 usec  
PLW1 54.00000000 W

==== CHANNEL f2 =====  
SFO2 400.2416010 MHz  
NUC2 1H  
CPDPRG[2] waltz16  
PCPD2 90.00 usec  
PLW2 12.00000000 W  
PLW12 0.30294999 W  
PLW13 0.24539000 W

F2 - Processing parameters  
SI 32768  
SF 100.6404280 MHz  
WDW EM  
SSB 0  
LB 1.00 Hz  
GB 0  
PC 1.40

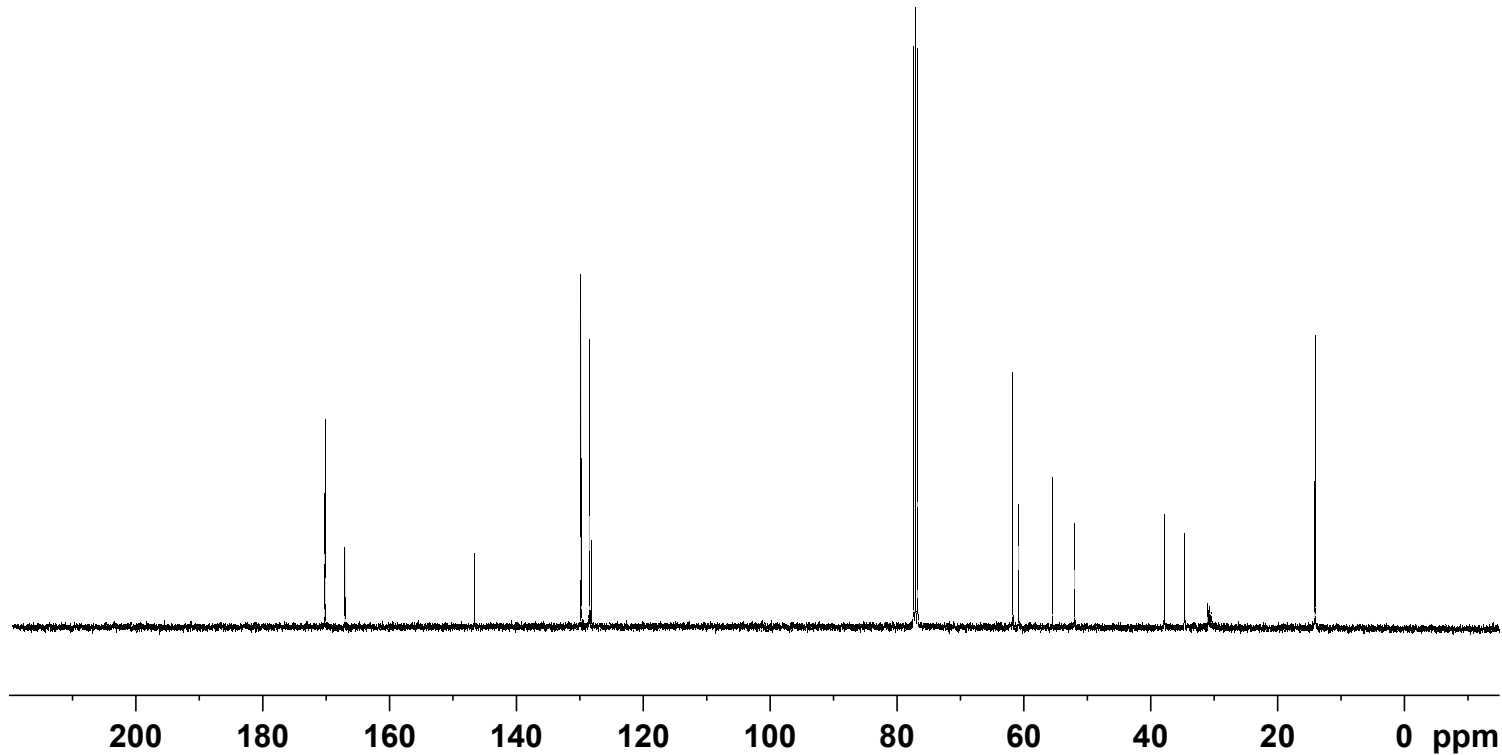

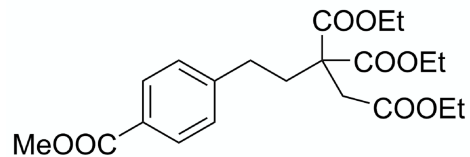

4-H

170.17  
170.14  
167.00  
146.58  
129.81  
128.43  
128.18

61.74  
60.80  
55.48  
51.97  
37.82  
34.67  
30.99  
14.10  
14.01

Current Data Parameters  
NAME 400M-2022  
EXPNO 22  
PROCNO 1

F2 - Acquisition Parameters  
Date\_ 20220701  
Time 8.52  
INSTRUM spect  
PROBHD 5 mm PABBO BB/  
PULPROG zgpg30  
TD 65536  
SOLVENT CDCl3  
NS 201  
DS 4  
SWH 24038.461 Hz  
FIDRES 0.366798 Hz  
AQ 1.3631488 sec  
RG 206.33  
DW 20.800 usec  
DE 6.50 usec  
TE 301.8 K  
D1 2.00000000 sec  
D11 0.03000000 sec  
TD0 1

==== CHANNEL f1 =====  
SFO1 100.6504916 MHz  
NUC1 13C  
P1 10.00 usec  
PLW1 54.00000000 W

==== CHANNEL f2 =====  
SFO2 400.2416010 MHz  
NUC2 1H  
CPDPRG[2] waltz16  
PCPD2 90.00 usec  
PLW2 12.00000000 W  
PLW12 0.30294999 W  
PLW13 0.24539000 W

F2 - Processing parameters  
SI 32768  
SF 100.6404280 MHz  
WDW EM  
SSB 0  
LB 1.00 Hz  
GB 0  
PC 1.40

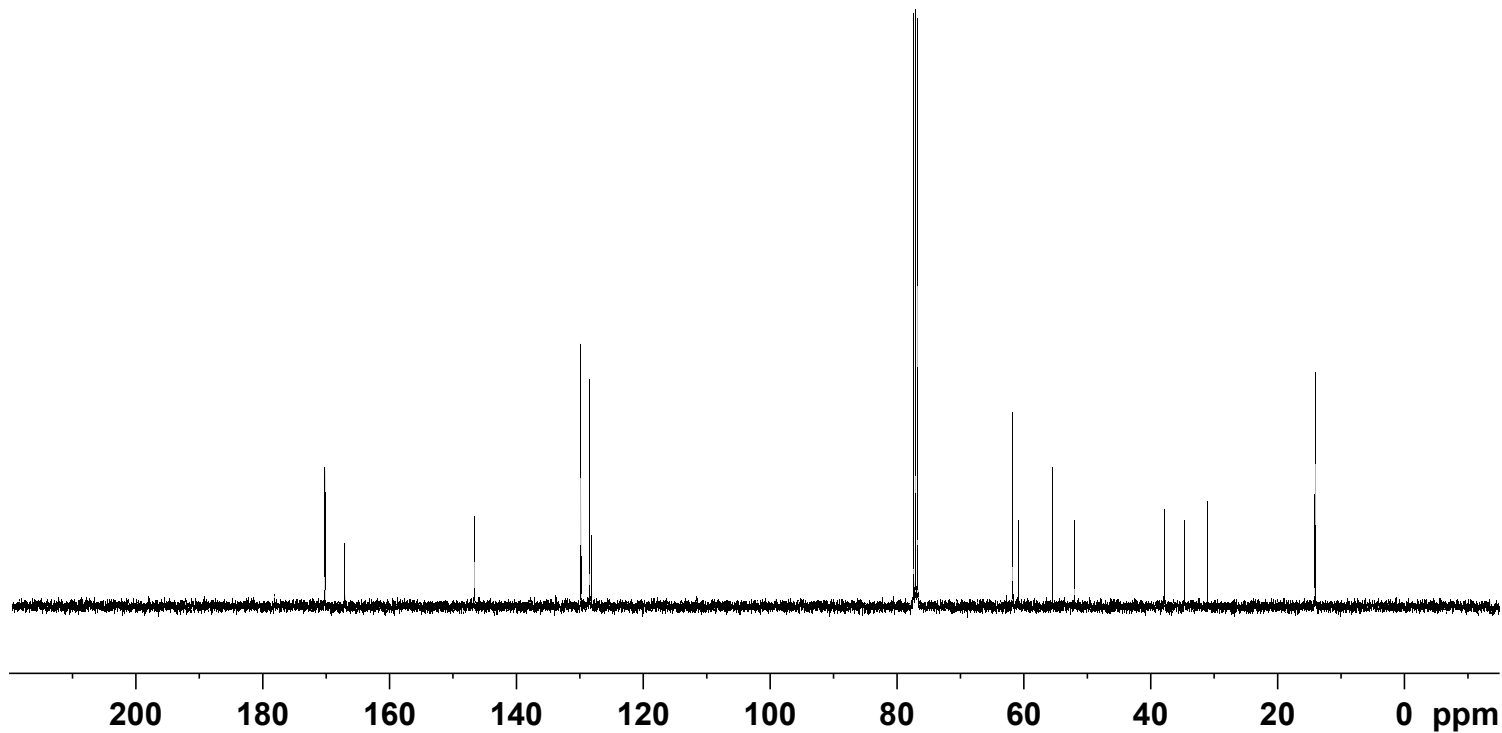

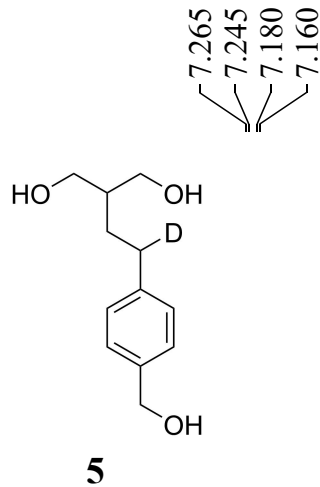

7.265  
7.245  
7.180  
7.160

4.581  
4.573  
4.239  
4.226  
4.213  
3.775  
3.641  
2.676  
2.656  
2.636  
2.617  
1.682  
1.666  
1.653  
1.638  
1.620  
1.604

Current Data Parameters  
 NAME 400M-2022  
 EXPNO 23  
 PROCNO 1

F2 - Acquisition Parameters  
 Date\_ 20220701  
 Time 8.56  
 INSTRUM spect  
 PROBHD 5 mm PABBO BB/  
 PULPROG zg30  
 TD 32768  
 SOLVENT Acetone  
 NS 16  
 DS 0  
 SWH 8012.820 Hz  
 FIDRES 0.244532 Hz  
 AQ 2.0447233 sec  
 RG 73.9  
 DW 62.400 usec  
 DE 6.50 usec  
 TE 301.0 K  
 D1 2.00000000 sec  
 D11 0 sec  
 TD0 1

==== CHANNEL f1 =====  
 SFO1 400.2424716 MHz  
 NUC1 1H  
 P1 14.30 usec  
 PLW1 12.00000000 W

==== CHANNEL f2 =====  
 SFO2 400.2424716 MHz  
 NUC2 off  
 CPDPRG[2]  
 PCPD2 0 usec  
 PLW2 0 W  
 PLW12 0 W  
 PLW13 0 W

F2 - Processing parameters  
 SI 65536  
 SF 400.2400058 MHz  
 WDW EM  
 SSB 0  
 LB 0.30 Hz  
 GB 0  
 PC 1.00

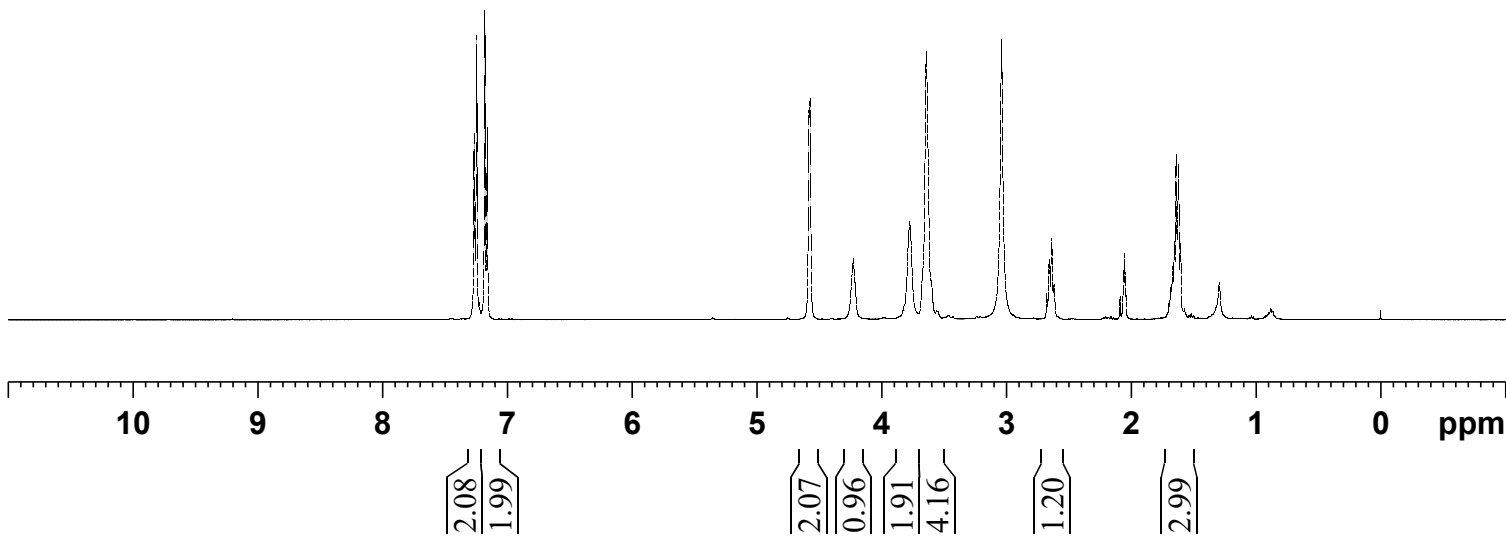

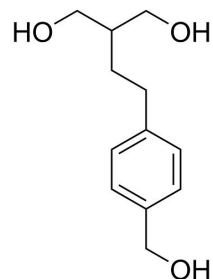

5-H

7.267  
7.248  
7.183  
7.163  
4.587  
4.573  
4.135  
4.121  
4.106  
3.666  
3.648  
3.635  
3.620  
2.898  
2.866  
2.681  
2.662  
2.642  
2.077  
2.071  
2.066  
2.060  
2.055  
2.049  
2.044  
1.656  
1.639  
1.620

Current Data Parameters  
NAME 400M-2022  
EXPNO 31  
PROCNO 1

F2 - Acquisition Parameters  
Date\_ 20220702  
Time 23.54  
INSTRUM spect  
PROBHD 5 mm PABBO BB/  
PULPROG zg30  
TD 32768  
SOLVENT Acetone  
NS 16  
DS 0  
SWH 8012.820 Hz  
FIDRES 0.244532 Hz  
AQ 2.0447233 sec  
RG 206.33  
DW 62.400 usec  
DE 6.50 usec  
TE 300.4 K  
D1 2.00000000 sec  
D11 0 sec  
TD0 1

==== CHANNEL f1 =====  
SFO1 400.2424716 MHz  
NUC1 1H  
P1 14.30 usec  
PLW1 12.00000000 W

==== CHANNEL f2 =====  
SFO2 400.2424716 MHz  
NUC2 off  
CPDPRG[2]  
PCPD2 0 usec  
PLW2 0 W  
PLW12 0 W  
PLW13 0 W

F2 - Processing parameters  
SI 65536  
SF 400.2400050 MHz  
WDW EM  
SSB 0  
LB 0.30 Hz  
GB 0  
PC 1.00

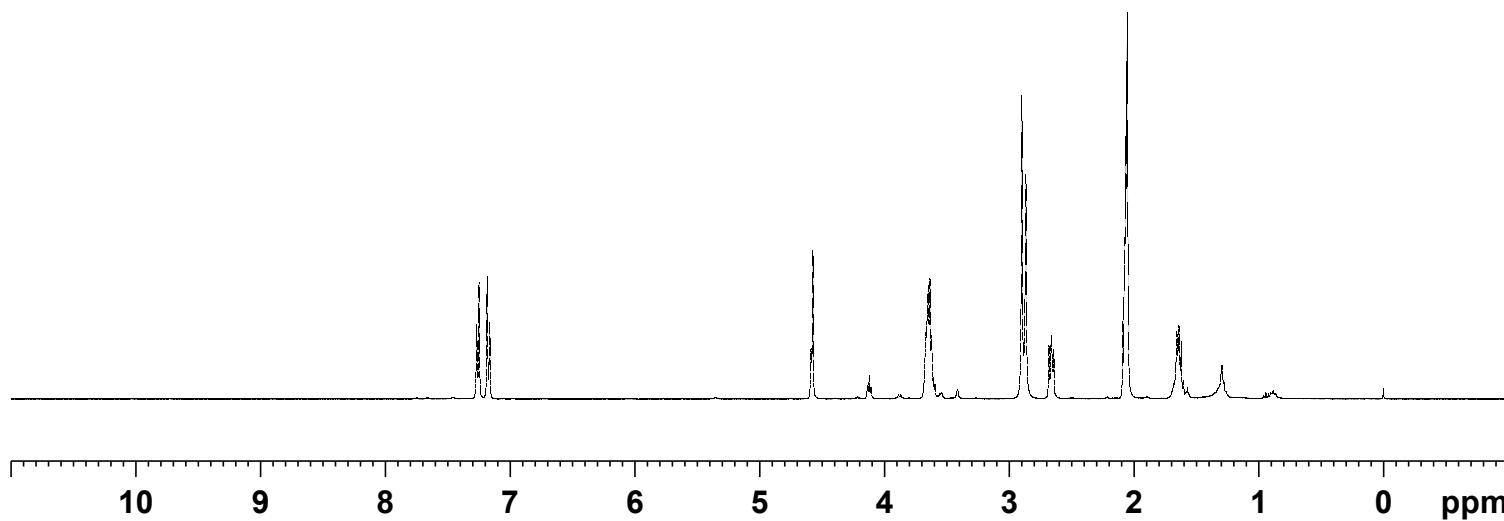

2.00  
2.03  
2.05  
0.52  
5.18  
7.35  
2.14  
9.28  
3.50

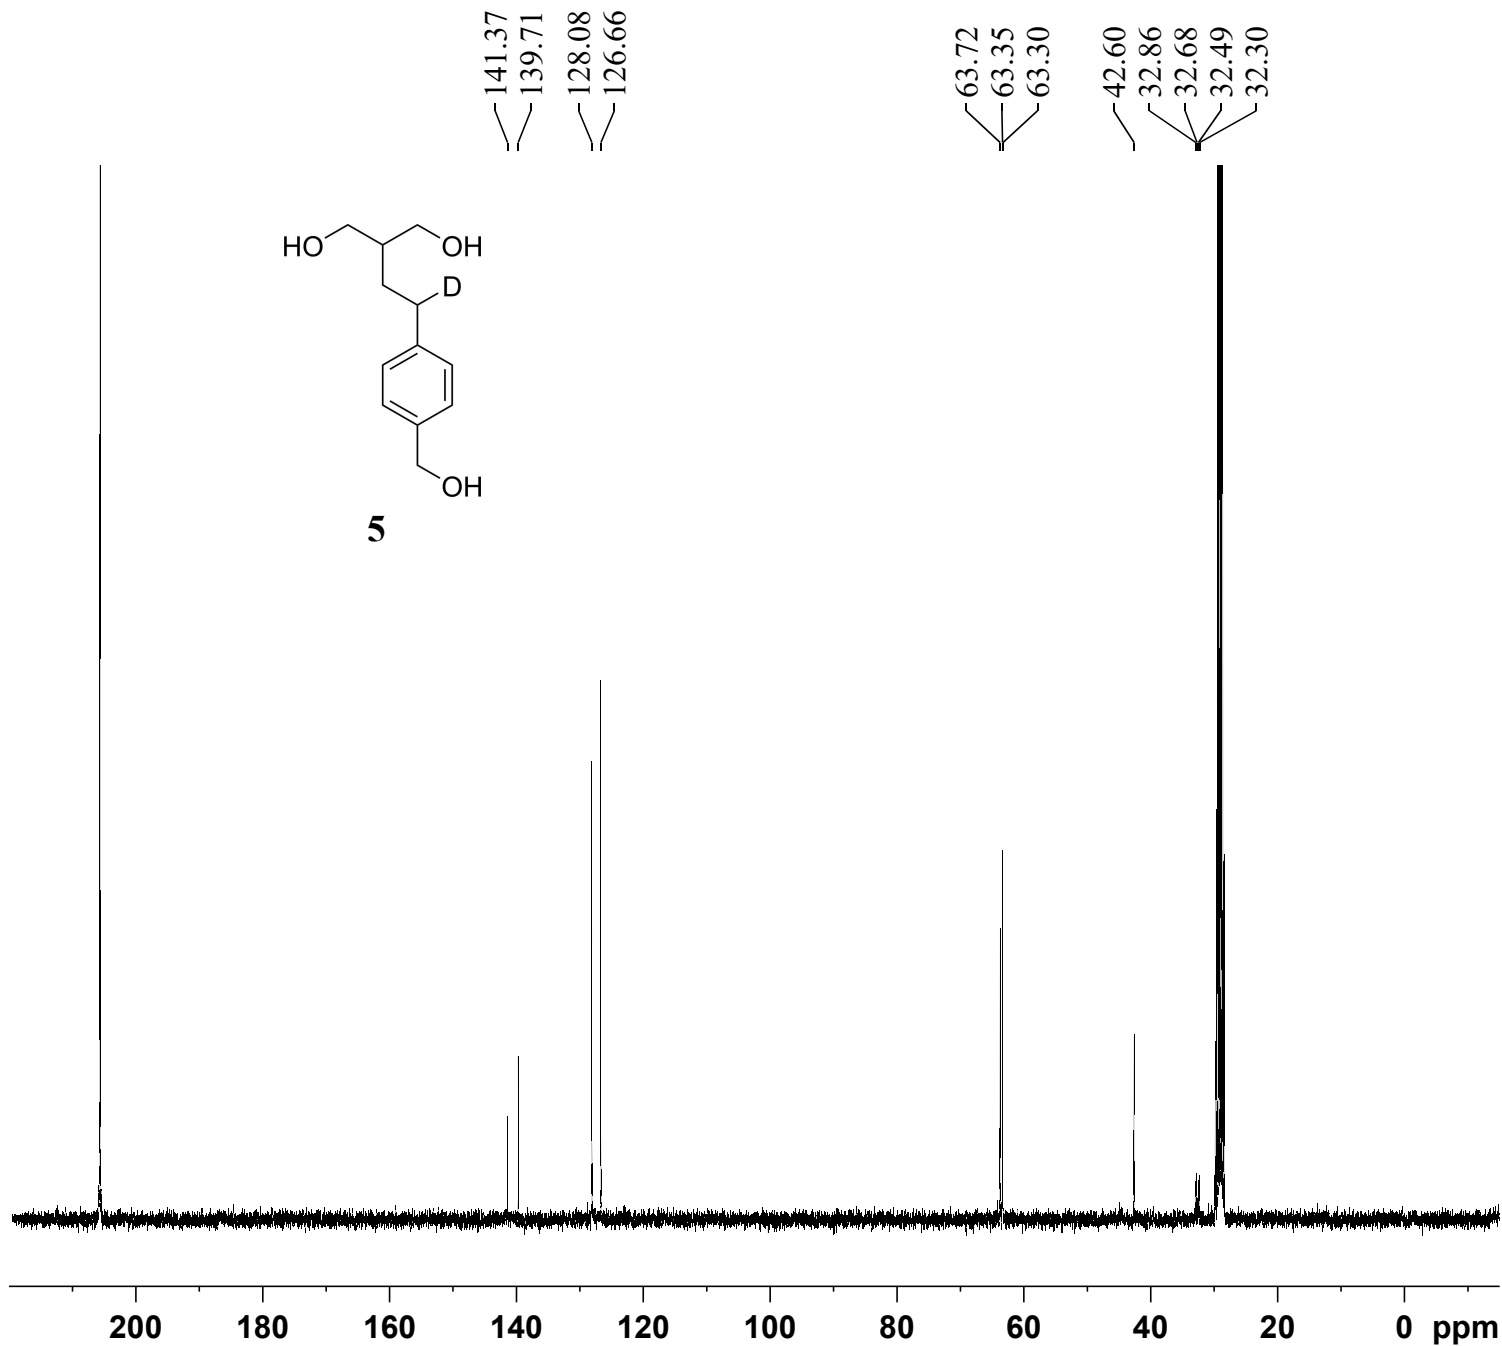

Current Data Parameters  
 NAME 400M-2022  
 EXPNO 24  
 PROCNO 1

F2 - Acquisition Parameters  
 Date\_ 20220701  
 Time 9.26  
 INSTRUM spect  
 PROBHD 5 mm PABBO BB/  
 PULPROG zgpg30  
 TD 65536  
 SOLVENT Acetone  
 NS 512  
 DS 4  
 SWH 24038.461 Hz  
 FIDRES 0.366798 Hz  
 AQ 1.3631488 sec  
 RG 206.33  
 DW 20.800 usec  
 DE 6.50 usec  
 TE 301.6 K  
 D1 2.00000000 sec  
 D11 0.03000000 sec  
 TD0 1

==== CHANNEL f1 =====  
 SFO1 100.6504916 MHz  
 NUC1 13C  
 P1 10.00 usec  
 PLW1 54.00000000 W

==== CHANNEL f2 =====  
 SFO2 400.2416010 MHz  
 NUC2 1H  
 CPDPRG[2] waltz16  
 PCPD2 90.00 usec  
 PLW2 12.00000000 W  
 PLW12 0.30294999 W  
 PLW13 0.24539000 W

F2 - Processing parameters  
 SI 32768  
 SF 100.6404280 MHz  
 WDW EM  
 SSB 0  
 LB 1.00 Hz  
 GB 0  
 PC 1.40

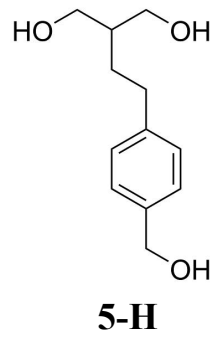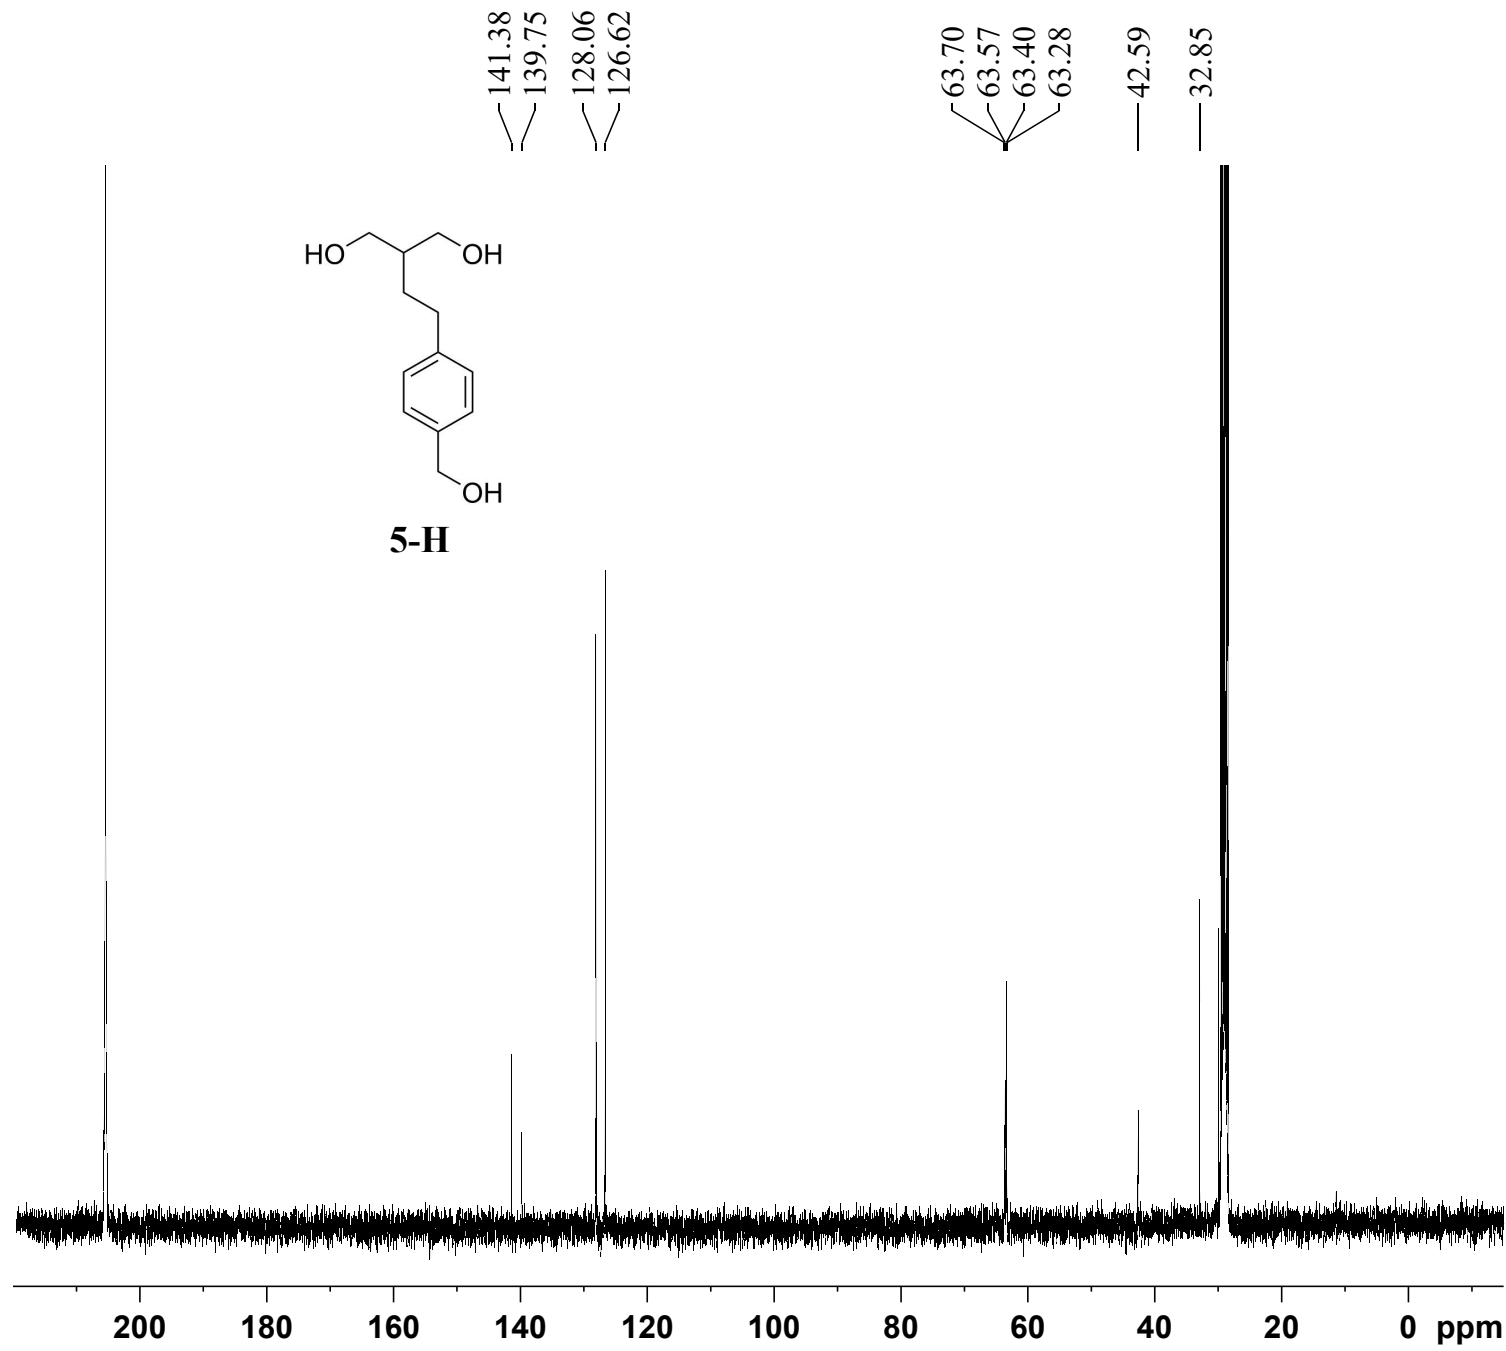

Current Data Parameters  
 NAME 400M-2022  
 EXPNO 34  
 PROCNO 1

F2 - Acquisition Parameters  
 Date\_ 20220706  
 Time 13.45  
 INSTRUM spect  
 PROBHD 5 mm PABBO BB/  
 PULPROG zgpg30  
 TD 65536  
 SOLVENT Acetone  
 NS 1024  
 DS 4  
 SWH 24038.461 Hz  
 FIDRES 0.366798 Hz  
 AQ 1.3631488 sec  
 RG 206.33  
 DW 20.800 usec  
 DE 6.50 usec  
 TE 301.0 K  
 D1 2.0000000 sec  
 D11 0.0300000 sec  
 TD0 1

==== CHANNEL f1 =====  
 SFO1 100.6504916 MHz  
 NUC1 13C  
 P1 10.00 usec  
 PLW1 54.0000000 W

==== CHANNEL f2 =====  
 SFO2 400.2416010 MHz  
 NUC2 1H  
 CPDPRG[2] waltz16  
 PCPD2 90.00 usec  
 PLW2 12.0000000 W  
 PLW12 0.30294999 W  
 PLW13 0.24539000 W

F2 - Processing parameters  
 SI 32768  
 SF 100.6404280 MHz  
 WDW EM  
 SSB 0  
 LB 1.00 Hz  
 GB 0  
 PC 1.40



7.925  
7.904  
7.475  
7.456  
7.419  
7.400  
7.357  
7.346  
7.339  
7.329  
7.320  
7.309  
7.284  
7.267  
7.258  
7.250  
7.172  
7.152  
3.885  
3.874  
3.865  
3.847  
3.754  
3.736  
3.727  
3.717  
3.709  
3.683  
2.909  
2.876  
2.860  
2.238  
2.204  
2.190  
2.174  
2.104  
2.088  
2.074  
1.018  
1.000  
0.982

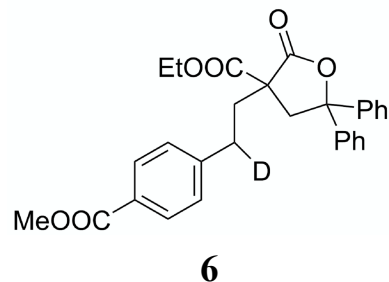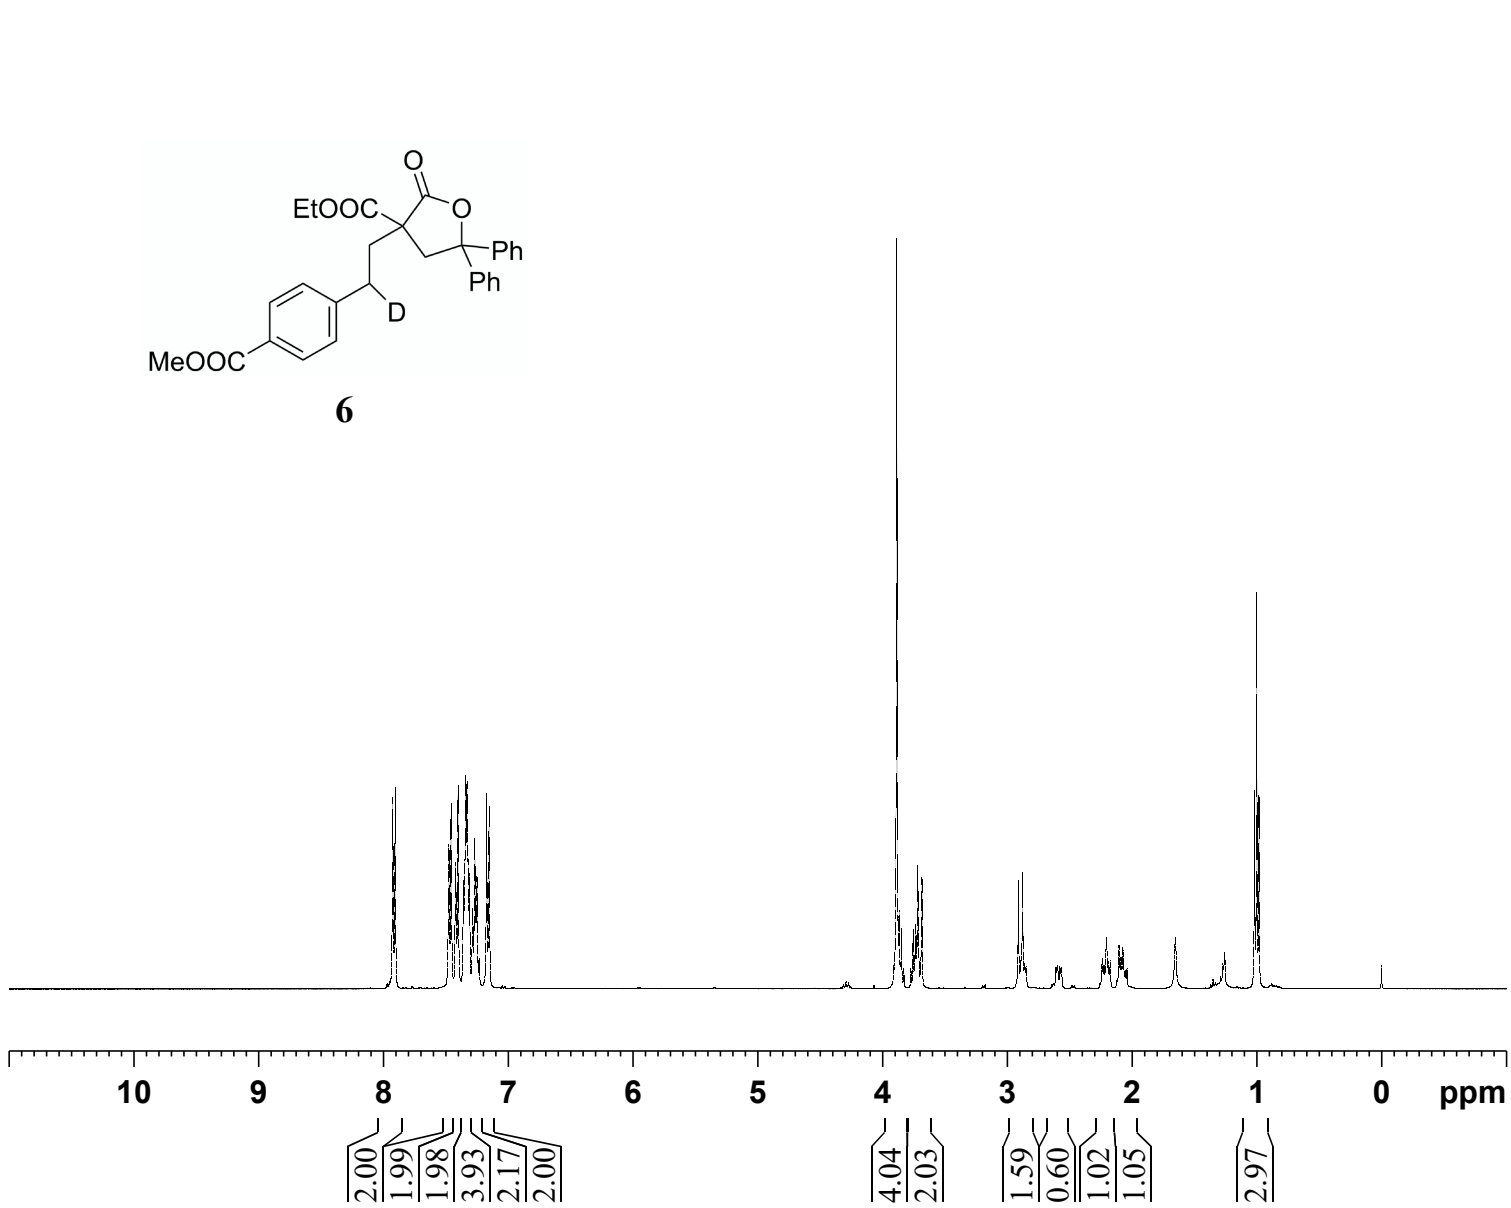

Current Data Parameters  
 NAME 400M-2022  
 EXPNO 27  
 PROCNO 1

F2 - Acquisition Parameters  
 Date\_ 20220701  
 Time 11.17  
 INSTRUM spect  
 PROBHD 5 mm PABBO BB/  
 PULPROG zg30  
 TD 32768  
 SOLVENT CDCl3  
 NS 16  
 DS 0  
 SWH 8012.820 Hz  
 FIDRES 0.244532 Hz  
 AQ 2.0447233 sec  
 RG 92.09  
 DW 62.400 usec  
 DE 6.50 usec  
 TE 300.5 K  
 D1 2.00000000 sec  
 D11 0 sec  
 TD0 1

==== CHANNEL f1 =====  
 SFO1 400.2424716 MHz  
 NUC1 1H  
 P1 14.30 usec  
 PLW1 12.00000000 W

==== CHANNEL f2 =====  
 SFO2 400.2424716 MHz  
 NUC2 off  
 CPDPRG[2]  
 PCPD2 0 usec  
 PLW2 0 W  
 PLW12 0 W  
 PLW13 0 W

F2 - Processing parameters  
 SI 65536  
 SF 400.2400102 MHz  
 WDW EM  
 SSB 0  
 LB 0.30 Hz  
 GB 0  
 PC 1.00

7.925  
7.904  
7.475  
7.456  
7.420  
7.401  
7.357  
7.346  
7.339  
7.329  
7.320  
7.309  
7.284  
7.266  
7.258  
7.250  
7.172  
7.152  
3.885  
3.874  
3.864  
3.846  
3.754  
3.736  
3.727  
3.718  
3.710  
3.684  
2.911  
2.893  
2.878  
2.611  
2.598  
2.223  
2.210  
2.107  
2.089  
2.077  
1.017  
1.000  
0.982

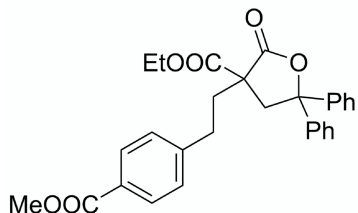

**6-H**

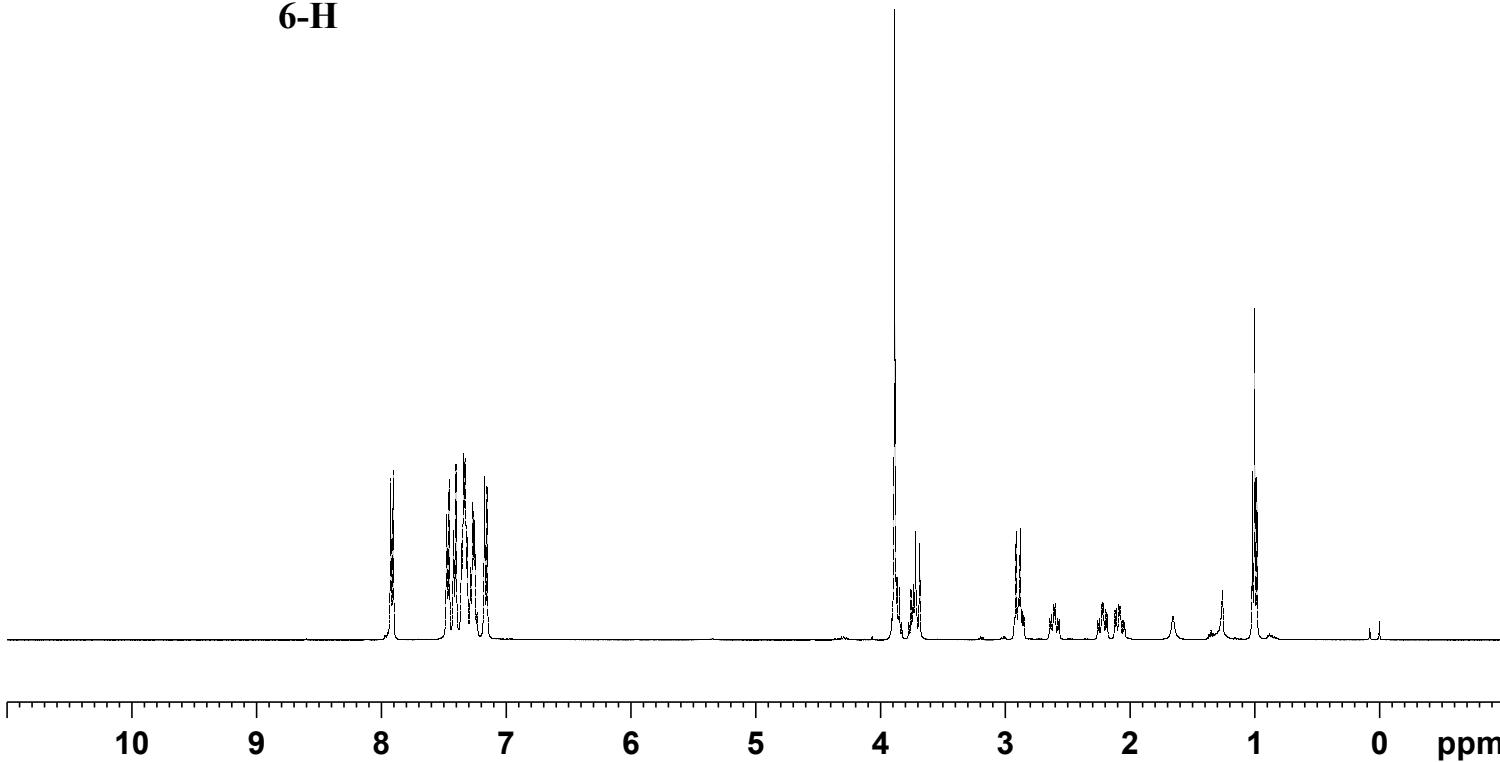

1.99  
1.98  
1.99  
4.04  
2.44  
2.00

3.98  
2.02  
1.95  
1.00  
1.01  
1.06

2.93

Current Data Parameters  
 NAME 400M-2022  
 EXPNO 29  
 PROCNO 1

F2 - Acquisition Parameters  
 Date\_ 20220701  
 Time 13.42  
 INSTRUM spect  
 PROBHD 5 mm PABBO BB/  
 PULPROG zg30  
 TD 32768  
 SOLVENT CDCl3  
 NS 16  
 DS 0  
 SWH 8012.820 Hz  
 FIDRES 0.244532 Hz  
 AQ 2.0447233 sec  
 RG 80.72  
 DW 62.400 usec  
 DE 6.50 usec  
 TE 300.4 K  
 D1 2.00000000 sec  
 D11 0 sec  
 TD0 1

==== CHANNEL f1 =====  
 SFO1 400.2424716 MHz  
 NUC1 1H  
 P1 14.30 usec  
 PLW1 12.00000000 W

==== CHANNEL f2 =====  
 SFO2 400.2424716 MHz  
 NUC2 off  
 CPDPRG[2]  
 PCPD2 0 usec  
 PLW2 0 W  
 PLW12 0 W  
 PLW13 0 W

F2 - Processing parameters  
 SI 65536  
 SF 400.2400102 MHz  
 WDW EM  
 SSB 0  
 LB 0.30 Hz  
 GB 0  
 PC 1.00

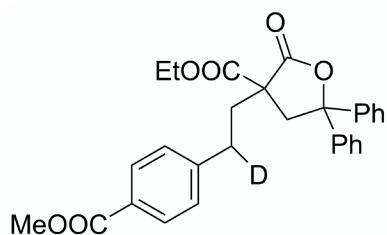

6

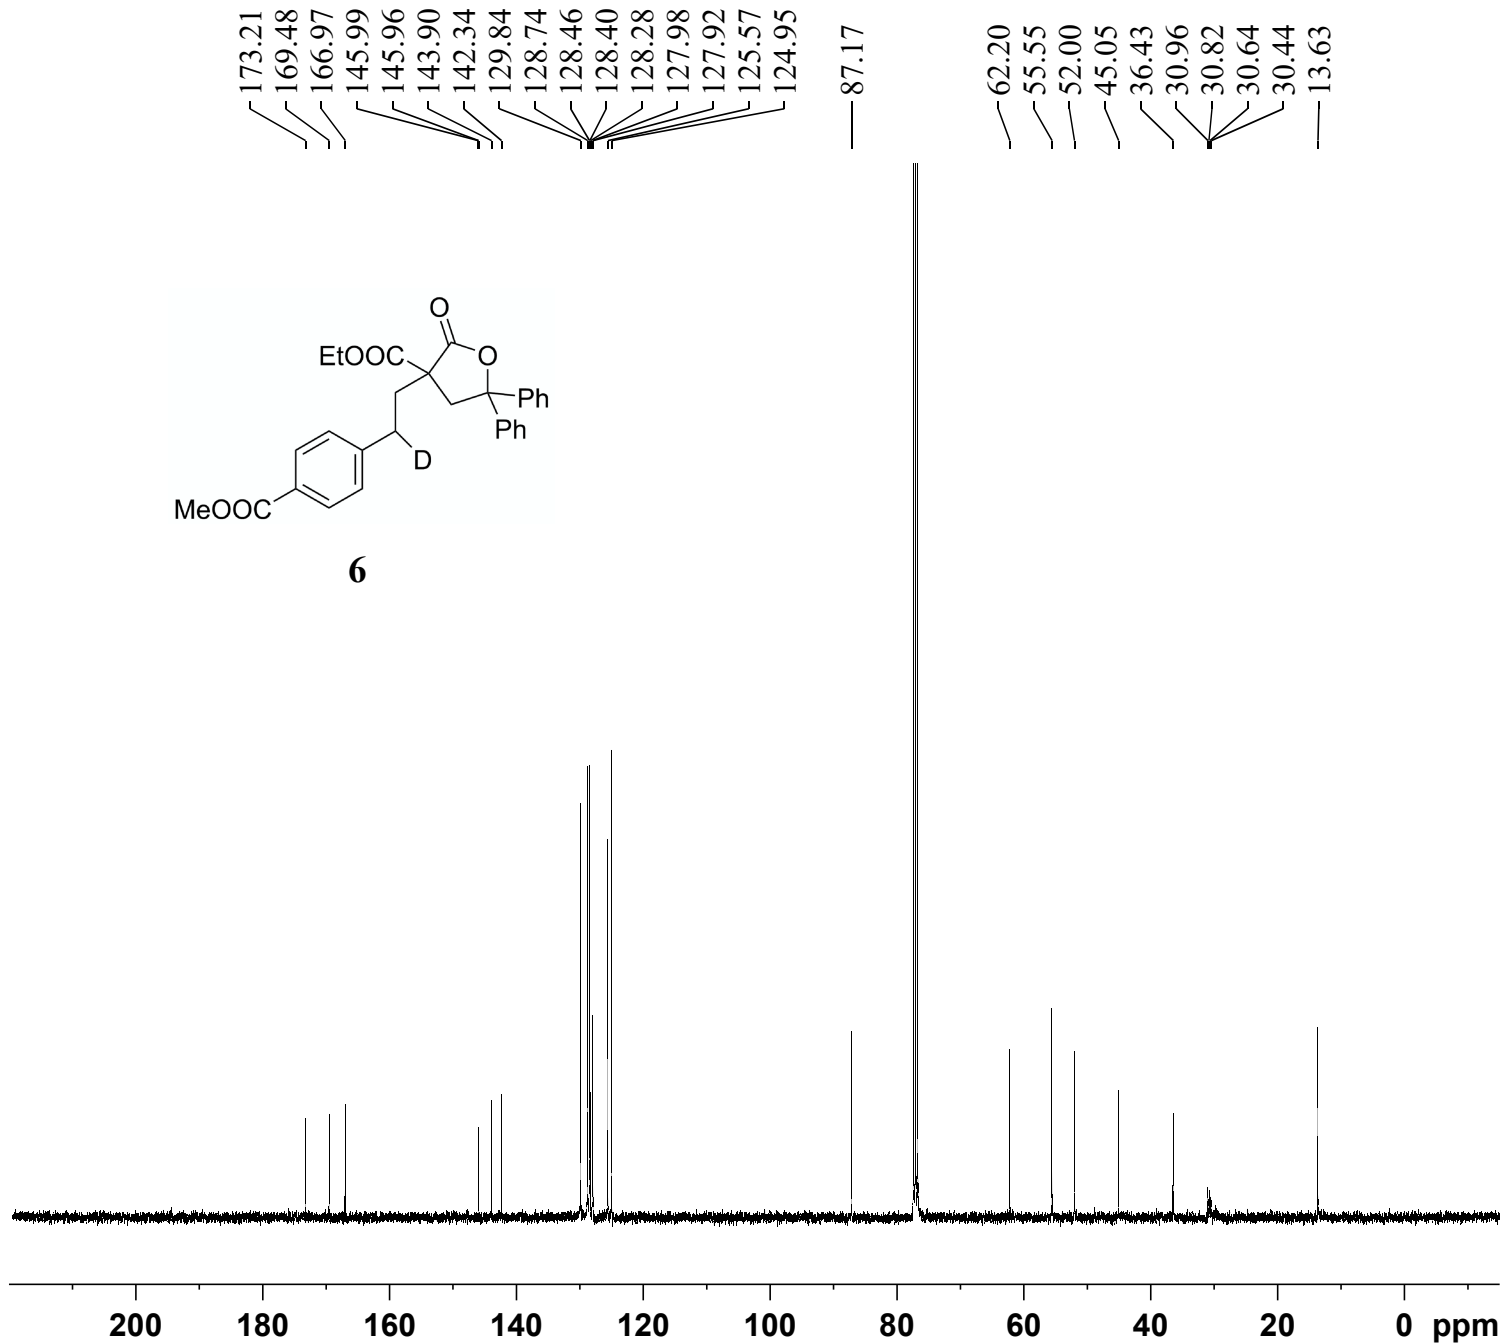

Current Data Parameters  
 NAME 400M-2022  
 EXPNO 28  
 PROCNO 1

F2 - Acquisition Parameters  
 Date\_ 20220701  
 Time 12.16  
 INSTRUM spect  
 PROBHD 5 mm PABBO BB/  
 PULPROG zgpg30  
 TD 65536  
 SOLVENT CDCl3  
 NS 1024  
 DS 4  
 SWH 24038.461 Hz  
 FIDRES 0.366798 Hz  
 AQ 1.3631488 sec  
 RG 206.33  
 DW 20.800 usec  
 DE 6.50 usec  
 TE 301.4 K  
 D1 2.00000000 sec  
 D11 0.03000000 sec  
 TD0 1

==== CHANNEL f1 =====  
 SFO1 100.6504916 MHz  
 NUC1 13C  
 P1 10.00 usec  
 PLW1 54.00000000 W

==== CHANNEL f2 =====  
 SFO2 400.2416010 MHz  
 NUC2 1H  
 CPDPRG[2] waltz16  
 PCPD2 90.00 usec  
 PLW2 12.00000000 W  
 PLW12 0.30294999 W  
 PLW13 0.24539000 W

F2 - Processing parameters  
 SI 32768  
 SF 100.6404280 MHz  
 WDW EM  
 SSB 0  
 LB 1.00 Hz  
 GB 0  
 PC 1.40

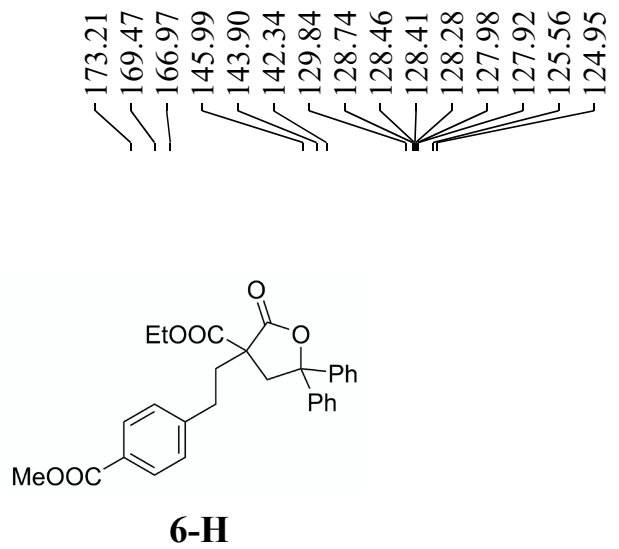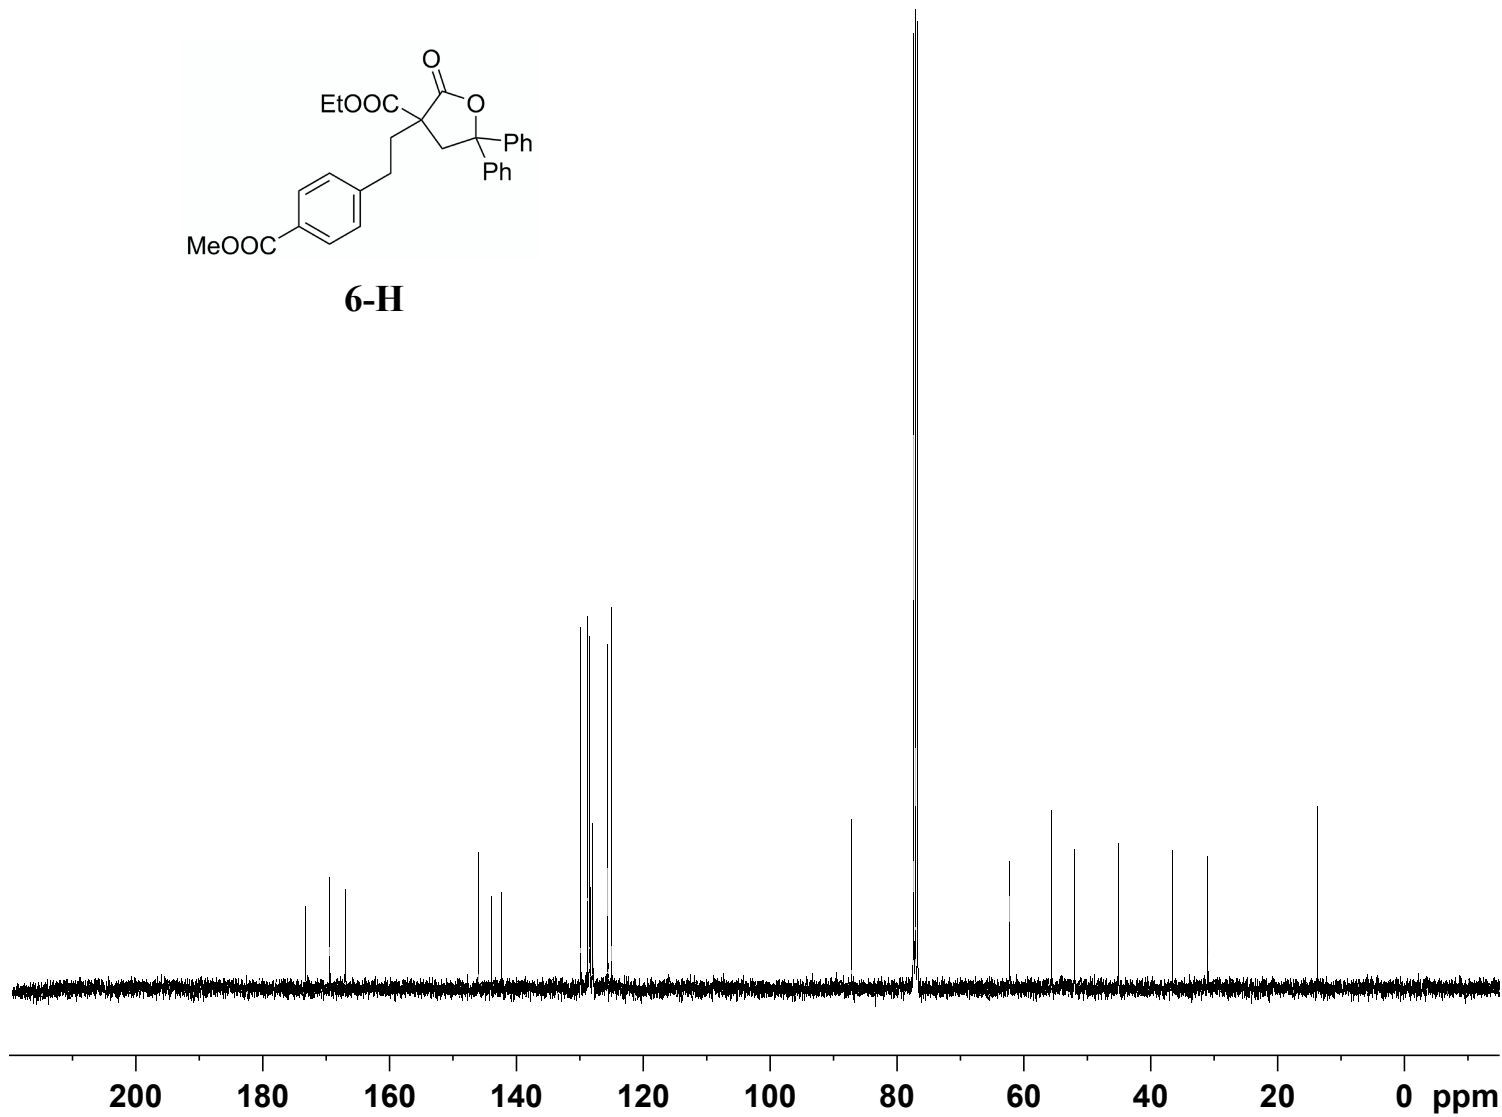

Current Data Parameters  
NAME 400M-2022  
EXPNO 30  
PROCNO 1

F2 - Acquisition Parameters  
Date\_ 20220701  
Time 13.57  
INSTRUM spect  
PROBHD 5 mm PABBO BB/  
PULPROG zgpg30  
TD 65536  
SOLVENT CDCl3  
NS 256  
DS 4  
SWH 24038.461 Hz  
FIDRES 0.366798 Hz  
AQ 1.3631488 sec  
RG 206.33  
DW 20.800 usec  
DE 6.50 usec  
TE 301.2 K  
D1 2.0000000 sec  
D11 0.0300000 sec  
TD0 1

==== CHANNEL f1 =====  
SFO1 100.6504916 MHz  
NUC1 13C  
P1 10.00 usec  
PLW1 54.0000000 W

==== CHANNEL f2 =====  
SFO2 400.2416010 MHz  
NUC2 1H  
CPDPRG[2] waltz16  
PCPD2 90.00 usec  
PLW2 12.0000000 W  
PLW12 0.30294999 W  
PLW13 0.24539000 W

F2 - Processing parameters  
SI 32768  
SF 100.6404280 MHz  
WDW EM  
SSB 0  
LB 1.00 Hz  
GB 0  
PC 1.40
